# Supplementary material for: Glycolytic flux controls retinal progenitor cell differentiation via regulating Wnt signaling
Source: eLife. 2025 Jun 17;13:RP100604. doi: 10.7554/eLife.100604 (PMC12173459; doi:10.7554/eLife.100604)
Supplement: Figure 2—source data 1. — Bulk RNA-seq data were performed on P0 wild-type (N = 4) and Pten-cKO (N = 5) retinas. The source data show the normalized RPKM (Reads Per Kilobase of transcript per Million reads) values, as a normalization method to quantify the abundance of transcripts, considering both the total number of reads and the length of the gene. Differentially expressed genes were identified using a DESeq1 1.28.1 package. Genes were considered to be differentially expressed if a comparison between wild-type and Pten-cKO retinas had an adjusted p-values (padj) less than 0.05 (Wald test, Benjamini–Hochberg correction for multiple comparisons). [file elife-100604-fig2-data1.xls]

## Sheet: CKO_vs_WT_annotated_results
	baseMean	log2FoldChange	lfcSE	stat	pvalue	padj	pten_CKO_1_S5	pten_CKO_3_S7	pten_CKO_4_S8	pten_CKO_5_S9	pten_CKO_6_S10	ptenWT_1_S1	ptenWT_2_S2	ptenWT_3_S3	ptenWT_4_S4	mgi_symbol	entrezgene_id	description
ENSMUSG00000102550	112.853	6.67161	0.496775	13.4298	4.04307e-41	5.03726e-37	187.939	195.483	195.56	227.089	201.759	2.32066	1.97211	1.79095	1.76479	Gm8276	NA	predicted gene 8276 [Source:MGI Symbol;Acc:MGI:3648019]
ENSMUSG00000035270	2185.19	-1.00951	0.0817809	-12.3441	5.24009e-35	3.26432e-31	1607.6	1366.65	1476.27	1351.95	1730.01	3149.91	2683.06	3084.02	3217.22	Impg2	224224	interphotoreceptor matrix proteoglycan 2 [Source:MGI Symbol;Acc:MGI:3044955]
ENSMUSG00000030257	8847.33	0.330296	0.0332422	9.93604	2.90121e-23	1.20487e-19	9821.01	9669.47	10119.2	9576.58	9475.36	7740.19	7988.04	7474.53	7761.56	Srgap3	259302	SLIT-ROBO Rho GTPase activating protein 3 [Source:MGI Symbol;Acc:MGI:2152938]
ENSMUSG00000044211	100.546	-1.39088	0.152751	-9.10557	8.58116e-20	2.67282e-16	67.4652	54.4929	61.644	57.6548	51.1244	157.805	167.63	142.381	144.713	Gm7887	NA	predicted gene 7887 [Source:MGI Symbol;Acc:MGI:3648251]
ENSMUSG00000032525	3618.04	0.347764	0.0386819	8.99034	2.46457e-19	6.14121e-16	3782.87	3947.71	3976.04	4152.32	4135.6	3132.9	3193.84	3136.85	3104.27	Nktr	18087	natural killer tumor recognition sequence [Source:MGI Symbol;Acc:MGI:97346]
ENSMUSG00000030695	4409.39	0.423735	0.0537957	7.87674	3.3602e-15	6.97746e-12	5323.01	5102.44	5185.54	4570.03	4676.06	3783.46	3842.66	3627.57	3573.71	Aldoa	11674	aldolase A, fructose-bisphosphate [Source:MGI Symbol;Acc:MGI:87994]
ENSMUSG00000045996	270.256	-0.881578	0.116329	-7.57832	3.5005e-14	6.23039e-11	163.844	201.537	215.754	184.731	216.366	322.572	377.66	409.232	340.605	Polr2k	17749	polymerase (RNA) II (DNA directed) polypeptide K [Source:MGI Symbol;Acc:MGI:102725]
ENSMUSG00000052133	1412	0.380776	0.0517688	7.35532	1.90466e-13	2.96628e-10	1628.8	1465.25	1658.01	1564.92	1556.56	1234.59	1220.74	1159.64	1219.47	Sema5b	20357	sema domain, seven thrombospondin repeats (type 1 and type 1-like), transmembrane domain (TM) and short cytoplasmic domain, (semaphorin) 5B [Source:MGI Symbol;Acc:MGI:107555]
ENSMUSG00000052512	2104.84	0.324153	0.0445704	7.27283	3.52036e-13	4.87335e-10	2228.28	2350.98	2297.84	2317.96	2364.5	1958.64	1840.97	1760.5	1823.91	Nav2	78286	neuron navigator 2 [Source:MGI Symbol;Acc:MGI:2183691]
ENSMUSG00000025207	1542.96	0.471314	0.0650239	7.24832	4.21969e-13	5.25731e-10	1599.89	1870.92	1731.35	1873.19	1731.84	1321.23	1231.58	1173.07	1353.6	Sema4g	26456	sema domain, immunoglobulin domain (Ig), transmembrane domain (TM) and short cytoplasmic domain, (semaphorin) 4G [Source:MGI Symbol;Acc:MGI:1347047]
ENSMUSG00000036427	3518.6	0.254664	0.035618	7.14988	8.68544e-13	9.83744e-10	3794.44	3770.39	3983.48	3714.62	3692.83	3119.75	3210.6	3188.79	3192.51	Gpi1	14751	glucose phosphate isomerase 1 [Source:MGI Symbol;Acc:MGI:95797]
ENSMUSG00000058600	3240.67	-0.51501	0.0724181	-7.11162	1.14689e-12	1.19076e-09	2300.56	2834.5	3052.44	2749.78	2672.16	3711.51	3759.83	4095.9	3989.32	Rpl30	19946	ribosomal protein L30 [Source:MGI Symbol;Acc:MGI:98037]
ENSMUSG00000051166	3829.97	0.301841	0.0430248	7.01551	2.29106e-12	2.19571e-09	4146.22	4045.45	4430.93	4067.61	4216.85	3554.48	3265.82	3439.52	3302.81	Eml5	319670	echinoderm microtubule associated protein like 5 [Source:MGI Symbol;Acc:MGI:2442513]
ENSMUSG00000009013	1693.93	-0.308543	0.0448825	-6.87445	6.22288e-12	5.53792e-09	1549.77	1553.48	1577.24	1482.55	1495.39	1978.75	1902.1	1812.44	1893.62	Dynll1	56455	dynein light chain LC8-type 1 [Source:MGI Symbol;Acc:MGI:1861457]
ENSMUSG00000025964	1322.31	0.338027	0.0497839	6.78988	1.12228e-11	9.32163e-09	1522.79	1412.49	1451.82	1457.84	1442.44	1147.95	1207.92	1171.28	1086.23	Adam23	23792	a disintegrin and metallopeptidase domain 23 [Source:MGI Symbol;Acc:MGI:1345162]
ENSMUSG00000028078	3185.33	0.337708	0.0500123	6.7525	1.45317e-11	1.13156e-08	3260.5	3842.18	3499.89	3467.53	3483.76	2798.72	2732.36	2724.93	2858.08	Dclk2	70762	doublecortin-like kinase 2 [Source:MGI Symbol;Acc:MGI:1918012]
ENSMUSG00000043639	281.521	-0.673403	0.100999	-6.6674	2.60383e-11	1.9083e-08	260.223	193.753	205.126	227.089	227.321	351.194	364.841	361.772	342.37	Rbm20	73713	RNA binding motif protein 20 [Source:MGI Symbol;Acc:MGI:1920963]
ENSMUSG00000060126	13646.6	-0.343804	0.0521116	-6.59746	4.1826e-11	2.89506e-08	11233.9	11953	12346.9	12381.7	13029.4	14851.5	14638	16531.4	15854	Tpt1	NA	tumor protein, translationally-controlled 1 [Source:MGI Symbol;Acc:MGI:104890]
ENSMUSG00000021779	846.997	-0.636254	0.0977514	-6.5089	7.5705e-11	4.96425e-08	820.185	605.477	651.514	668.325	652.749	986.282	970.28	1054.87	1213.3	Thrb	21834	thyroid hormone receptor beta [Source:MGI Symbol;Acc:MGI:98743]
ENSMUSG00000079435	2262.02	-0.328888	0.0514364	-6.39408	1.61521e-10	1.00619e-07	1864.93	2087.17	2104.4	2002.62	2094.27	2435.15	2480.92	2630.01	2658.66	Rpl36a	19982	ribosomal protein L36A [Source:MGI Symbol;Acc:MGI:1201789]
ENSMUSG00000040280	1292.83	0.416152	0.0655256	6.35098	2.13941e-10	1.26928e-07	1583.51	1383.95	1535.79	1386.07	1385.84	1075.24	1024.51	1076.36	1184.18	Ndufa4l2	407790	Ndufa4, mitochondrial complex associated like 2 [Source:MGI Symbol;Acc:MGI:3039567]
ENSMUSG00000006307	2323.43	0.262358	0.0415756	6.31037	2.78374e-10	1.57648e-07	2588.74	2441.8	2466.82	2502.69	2545.27	2146.61	2089.45	1983.48	2145.99	Kmt2b	75410	lysine (K)-specific methyltransferase 2B [Source:MGI Symbol;Acc:MGI:109565]
ENSMUSG00000014498	1694.49	0.278338	0.0456421	6.09828	1.07214e-09	5.34312e-07	1903.48	1829.41	1819.56	1837.89	1797.57	1505.34	1585.58	1429.18	1542.43	Ankrd52	237615	ankyrin repeat domain 52 [Source:MGI Symbol;Acc:MGI:2444029]
ENSMUSG00000025381	955.545	-0.313369	0.0513578	-6.10168	1.04956e-09	5.34312e-07	884.758	824.314	852.388	857.762	893.764	1066.73	1056.07	1060.24	1103.88	Cnpy2	56530	canopy FGF signaling regulator 2 [Source:MGI Symbol;Acc:MGI:1928477]
ENSMUSG00000097767	29605.1	0.474162	0.077709	6.10176	1.04908e-09	5.34312e-07	35388.4	32930.2	37347.8	32052.5	31357.5	27904.4	25274.6	21051.7	23139.1	Miat	330166	myocardial infarction associated transcript (non-protein coding) [Source:MGI Symbol;Acc:MGI:2444886]
ENSMUSG00000040943	1254.8	0.36718	0.0604637	6.07273	1.25752e-09	5.85066e-07	1304.97	1410.76	1541.1	1329.59	1383.1	1043.53	1069.87	1137.25	1072.99	Tet2	214133	tet methylcytosine dioxygenase 2 [Source:MGI Symbol;Acc:MGI:2443298]
ENSMUSG00000071528	977.094	-0.35664	0.0587409	-6.07141	1.2679e-09	5.85066e-07	815.366	878.807	909.781	867.175	872.767	1050.49	1074.8	1177.55	1147.12	Atp5md	66477	ATP synthase membrane subunit DAPIT [Source:MGI Symbol;Acc:MGI:1891435]
ENSMUSG00000009108	598.125	-0.691296	0.114589	-6.03284	1.61104e-09	7.05464e-07	526.229	435.944	460.205	420.056	506.679	821.515	580.787	796.077	835.63	Gnat2	14686	guanine nucleotide binding protein, alpha transducing 2 [Source:MGI Symbol;Acc:MGI:95779]
ENSMUSG00000058558	7242.77	-0.306148	0.0507836	-6.02849	1.655e-09	7.05464e-07	5908.99	6738.96	6790.41	6695.02	6637.96	7807.49	7810.55	8578.65	8216.88	Rpl5	100503670	ribosomal protein L5 [Source:MGI Symbol;Acc:MGI:102854]
ENSMUSG00000063919	3178.31	0.30336	0.0503563	6.02428	1.69869e-09	7.05464e-07	3323.14	3445.16	3697.58	3467.53	3425.34	3018.41	2619.95	2784.93	2822.79	Srrm4	68955	serine/arginine repetitive matrix 4 [Source:MGI Symbol;Acc:MGI:1916205]
ENSMUSG00000060780	898.916	0.665961	0.11091	6.0045	1.91918e-09	7.71326e-07	1406.17	1016.34	1059.64	929.537	966.799	717.085	639.951	681.457	673.269	Lrrtm1	74342	leucine rich repeat transmembrane neuronal 1 [Source:MGI Symbol;Acc:MGI:2389173]
ENSMUSG00000042670	482.499	-0.469326	0.0786231	-5.96932	2.38244e-09	9.27588e-07	397.081	384.045	421.943	418.88	440.035	577.845	510.777	588.327	603.559	Immp1l	66541	IMP1 inner mitochondrial membrane peptidase-like (S. cerevisiae) [Source:MGI Symbol;Acc:MGI:1913791]
ENSMUSG00000026193	2767.95	0.448107	0.0757505	5.91557	3.30735e-09	1.24867e-06	2990.64	3415.76	2945.1	2823.91	3525.76	2454.49	2338.93	2337.19	2079.81	Fn1	14268	fibronectin 1 [Source:MGI Symbol;Acc:MGI:95566]
ENSMUSG00000035545	5647.9	0.355848	0.0604359	5.88802	3.90856e-09	1.43226e-06	6017.9	5714.84	6241.99	6902.1	6406.07	5260.94	4765.61	4567.82	4953.78	Leng8	232798	leukocyte receptor cluster (LRC) member 8 [Source:MGI Symbol;Acc:MGI:2142195]
ENSMUSG00000021819	2648.37	0.214619	0.0365703	5.86867	4.39294e-09	1.56376e-06	2837.4	2922.72	2792.05	2834.5	2721.46	2426.64	2423.73	2402.56	2474.24	Zswim8	268721	zinc finger SWIM-type containing 8 [Source:MGI Symbol;Acc:MGI:1919156]
ENSMUSG00000036591	3847.46	0.246972	0.0422648	5.84344	5.11342e-09	1.76967e-06	4326.45	4195.96	4197.11	3907.58	4053.44	3525.86	3635.59	3409.97	3375.17	Arhgap21	71435	Rho GTPase activating protein 21 [Source:MGI Symbol;Acc:MGI:1918685]
ENSMUSG00000003810	2678.01	0.291781	0.0500241	5.8328	5.45049e-09	1.83534e-06	2920.28	3035.17	2849.44	2966.28	2806.36	2547.32	2438.52	2210.93	2327.76	Mast2	17776	microtubule associated serine/threonine kinase 2 [Source:MGI Symbol;Acc:MGI:894676]
ENSMUSG00000056494	617.863	-0.479089	0.0831243	-5.76352	8.23784e-09	2.70093e-06	523.337	470.542	529.289	533.013	574.237	729.462	645.867	801.45	753.567	Cngb3	30952	cyclic nucleotide gated channel beta 3 [Source:MGI Symbol;Acc:MGI:1353562]
ENSMUSG00000029478	3736.25	0.223622	0.0389829	5.73642	9.66971e-09	3.06291e-06	4135.62	3841.32	4097.2	3818.16	4061.65	3469.39	3469.93	3341.02	3391.93	Ncor2	20602	nuclear receptor co-repressor 2 [Source:MGI Symbol;Acc:MGI:1337080]
ENSMUSG00000040797	1730.97	0.283421	0.0494319	5.73357	9.83358e-09	3.06291e-06	1944.93	1818.16	1816.37	2020.27	1803.05	1567.22	1565.86	1538.43	1504.49	Iqsec3	243621	IQ motif and Sec7 domain 3 [Source:MGI Symbol;Acc:MGI:2677208]
ENSMUSG00000029512	1603.75	0.268068	0.0468627	5.72028	1.06348e-08	3.23169e-06	1812.89	1777.51	1736.66	1634.34	1709.93	1495.28	1429.78	1419.33	1418.01	Ulk1	22241	unc-51 like kinase 1 [Source:MGI Symbol;Acc:MGI:1270126]
ENSMUSG00000039218	13275.4	0.269517	0.0473585	5.691	1.26298e-08	3.74655e-06	15092	13652.6	14384.3	13856	14827.9	11727.1	12831.6	11261.5	11845.3	Srrm2	75956	serine/arginine repetitive matrix 2 [Source:MGI Symbol;Acc:MGI:1923206]
ENSMUSG00000031320	6823.63	-0.262449	0.0461998	-5.68075	1.34106e-08	3.88563e-06	5824.18	6078.13	6647.99	6411.45	6380.51	7392.09	7239.63	7871.23	7567.43	Rps4x	20102	ribosomal protein S4, X-linked [Source:MGI Symbol;Acc:MGI:98158]
ENSMUSG00000004031	651.72	0.40359	0.071135	5.67358	1.39847e-08	3.95988e-06	701.638	806.15	753.545	695.388	696.57	536.847	562.052	583.85	529.438	Brinp2	240843	bone morphogenic protein/retinoic acid inducible neural-specific 2 [Source:MGI Symbol;Acc:MGI:2443333]
ENSMUSG00000043716	8283.78	-0.24996	0.0440894	-5.66938	1.43318e-08	3.96799e-06	7390.34	7394.61	8048.8	7776.34	7598.37	8571.76	8884.37	9301.3	9588.12	Rpl7	NA	ribosomal protein L7 [Source:MGI Symbol;Acc:MGI:98073]
ENSMUSG00000021268	11817.8	0.534838	0.0944497	5.66268	1.4903e-08	4.03644e-06	12102.3	15609.2	14258.9	15091.4	11462.8	10559.8	9072.71	8336.87	9866.08	Meg3	17263	maternally expressed 3 [Source:MGI Symbol;Acc:MGI:1202886]
ENSMUSG00000021196	2558.95	0.437967	0.0774992	5.65125	1.59289e-08	4.22251e-06	3000.28	3147.62	3105.58	2635.65	2590	2023.62	1943.52	2253.91	2330.41	Pfkp	56421	phosphofructokinase, platelet [Source:MGI Symbol;Acc:MGI:1891833]
ENSMUSG00000020601	4983.44	0.207866	0.036971	5.62242	1.88303e-08	4.88764e-06	5467.58	5086.01	5174.91	5308.95	5462.1	4649.06	4442.18	4554.39	4705.82	Trib2	217410	tribbles pseudokinase 2 [Source:MGI Symbol;Acc:MGI:2145021]
ENSMUSG00000026787	1572.68	0.380772	0.0680418	5.59614	2.19173e-08	5.57281e-06	1601.82	1788.75	1898.21	1794.36	1686.19	1458.92	1355.83	1361.12	1208.88	Gad2	14417	glutamic acid decarboxylase 2 [Source:MGI Symbol;Acc:MGI:95634]
ENSMUSG00000060636	2063.74	-0.354647	0.0635719	-5.57867	2.42361e-08	6.03915e-06	1619.17	1835.46	1940.72	1817.89	1968.29	2303.65	2268.92	2528.82	2290.7	Rpl35a	57808	ribosomal protein L35A [Source:MGI Symbol;Acc:MGI:1928894]
ENSMUSG00000051790	3221.85	0.236372	0.0425663	5.55302	2.80772e-08	6.8591e-06	3475.42	3561.07	3256.51	3515.77	3459.11	3009.9	3044.94	2846.72	2827.2	Nlgn2	216856	neuroligin 2 [Source:MGI Symbol;Acc:MGI:2681835]
ENSMUSG00000058546	2727.72	-0.338816	0.061392	-5.51889	3.41143e-08	8.17365e-06	2276.47	2399.42	2457.26	2432.09	2638.38	3048.58	2788.57	3152.07	3356.64	Rpl23a	268449	ribosomal protein L23A [Source:MGI Symbol;Acc:MGI:3040672]
ENSMUSG00000039016	755.927	-0.371257	0.0675372	-5.49707	3.86156e-08	9.07759e-06	657.304	660.835	668.519	678.915	679.224	860.193	784.901	854.283	959.165	Timm8b	30057	translocase of inner mitochondrial membrane 8B [Source:MGI Symbol;Acc:MGI:1353424]
ENSMUSG00000020277	2041.58	0.386414	0.0706968	5.46579	4.60838e-08	1.06326e-05	2424.89	2284.38	2466.82	2192.06	2030.37	1832.55	1873.51	1595.74	1673.91	Pfkl	18641	phosphofructokinase, liver, B-type [Source:MGI Symbol;Acc:MGI:97547]
ENSMUSG00000042810	1256.01	0.256551	0.0470515	5.45256	4.96495e-08	1.1247e-05	1347.38	1308.7	1357.23	1390.78	1368.49	1175.8	1144.81	1120.24	1090.64	Krba1	77827	KRAB-A domain containing 1 [Source:MGI Symbol;Acc:MGI:1925077]
ENSMUSG00000038002	1203.39	0.254233	0.0467326	5.44016	5.32338e-08	1.18436e-05	1305.93	1264.58	1314.72	1270.76	1326.5	1096.9	1092.55	1044.12	1114.47	Cramp1l	57354	cramped chromatin regulator homolog 1 [Source:MGI Symbol;Acc:MGI:1930190]
ENSMUSG00000025369	6400.71	0.209152	0.0385143	5.43051	5.61925e-08	1.22825e-05	6902.66	6776.15	6752.15	6992.71	6623.35	6053.84	6154.96	5578.81	5771.76	Smarcc2	68094	SWI/SNF related, matrix associated, actin dependent regulator of chromatin, subfamily c, member 2 [Source:MGI Symbol;Acc:MGI:1915344]
ENSMUSG00000022722	759.61	-0.38314	0.0707978	-5.41175	6.24102e-08	1.34064e-05	705.494	655.645	699.341	657.736	629.926	942.189	780.957	873.984	891.221	Arl6	56297	ADP-ribosylation factor-like 6 [Source:MGI Symbol;Acc:MGI:1927136]
ENSMUSG00000039852	3474.71	0.219985	0.0406976	5.40535	6.46829e-08	1.36591e-05	3743.36	3563.67	3720.96	3621.66	3887.28	3179.31	3309.21	3055.36	3191.63	Rere	68703	arginine glutamic acid dipeptide (RE) repeats [Source:MGI Symbol;Acc:MGI:2683486]
ENSMUSG00000035569	4201.31	0.193902	0.0361405	5.36523	8.08446e-08	1.67874e-05	4264.77	4443.34	4420.3	4671.22	4452.39	3879.38	3986.63	3817.41	3876.37	Ankrd11	77087	ankyrin repeat domain 11 [Source:MGI Symbol;Acc:MGI:1924337]
ENSMUSG00000073702	4482.89	-0.332472	0.0623083	-5.33591	9.5065e-08	1.94166e-05	3572.77	4038.53	4259.82	3999.36	4229.63	4935.28	4640.38	5336.14	5334.09	Rpl31	114641	ribosomal protein L31 [Source:MGI Symbol;Acc:MGI:2149632]
ENSMUSG00000053046	1850.62	0.264578	0.0499945	5.29214	1.20892e-07	2.42934e-05	1952.64	2129.55	2087.4	1933.2	1895.25	1717.29	1625.02	1636.93	1678.32	Brsk2	75770	BR serine/threonine kinase 2 [Source:MGI Symbol;Acc:MGI:1923020]
ENSMUSG00000059070	3611.35	-0.277664	0.0526166	-5.27712	1.31232e-07	2.59527e-05	3178.58	3235.84	3372.35	3233.38	3481.94	4138.52	3664.19	3921.29	4276.09	Rpl18	19899	ribosomal protein L18 [Source:MGI Symbol;Acc:MGI:98003]
ENSMUSG00000003233	1315.06	0.277421	0.0527385	5.26032	1.43806e-07	2.77558e-05	1459.18	1422.87	1399.75	1422.54	1425.09	1213.71	1226.65	1070.09	1195.65	Dvl3	13544	dishevelled segment polarity protein 3 [Source:MGI Symbol;Acc:MGI:108100]
ENSMUSG00000043456	1369.88	0.399491	0.0759627	5.25905	1.44805e-07	2.77558e-05	1295.33	1470.44	1630.38	1627.28	1652.41	1147.18	1115.23	1165.91	1224.77	Zfp536	243937	zinc finger protein 536 [Source:MGI Symbol;Acc:MGI:1926102]
ENSMUSG00000030613	673.27	-0.321718	0.061259	-5.25176	1.5065e-07	2.84386e-05	594.658	596.827	640.886	605.964	592.495	730.236	728.696	777.272	792.392	Ccdc90b	66365	coiled-coil domain containing 90B [Source:MGI Symbol;Acc:MGI:1913615]
ENSMUSG00000037071	236.271	0.698071	0.133176	5.24172	1.59087e-07	2.92922e-05	350.819	302.739	277.398	247.092	245.58	188.747	191.295	168.349	154.419	Scd1	20249	stearoyl-Coenzyme A desaturase 1 [Source:MGI Symbol;Acc:MGI:98239]
ENSMUSG00000058975	589.071	0.457047	0.0872092	5.24081	1.59874e-07	2.92922e-05	614.897	796.635	655.765	664.795	616.232	474.189	495.986	493.407	489.73	Kcnc1	16502	potassium voltage gated channel, Shaw-related subfamily, member 1 [Source:MGI Symbol;Acc:MGI:96667]
ENSMUSG00000022961	12671.1	0.174272	0.0333855	5.21999	1.78937e-07	3.23098e-05	12687.3	13024.7	13702	13770.1	13548.9	11666	11920.4	11856.1	11864.7	Son	20658	Son DNA binding protein [Source:MGI Symbol;Acc:MGI:98353]
ENSMUSG00000007817	5612.65	0.24459	0.046928	5.21203	1.86789e-07	3.28277e-05	5840.56	5817.77	5796.67	6176.12	6521.1	5118.61	5337.52	4934.96	4970.54	Zmiz1	328365	zinc finger, MIZ-type containing 1 [Source:MGI Symbol;Acc:MGI:3040693]
ENSMUSG00000013236	14173.4	0.239907	0.0460319	5.21174	1.87075e-07	3.28277e-05	16634	14489.9	15046.5	14583.1	15289.9	12754.4	12985.4	12439.9	13337.4	Ptprs	19280	protein tyrosine phosphatase, receptor type, S [Source:MGI Symbol;Acc:MGI:97815]
ENSMUSG00000022336	2626.85	-0.346327	0.0666283	-5.19789	2.01561e-07	3.44007e-05	2227.32	2443.53	2490.21	2290.9	2268.65	2743.02	2731.38	3252.37	3194.28	Eif3e	16341	eukaryotic translation initiation factor 3, subunit E [Source:MGI Symbol;Acc:MGI:99257]
ENSMUSG00000062997	3062.31	-0.348834	0.0670899	-5.19949	1.99831e-07	3.44007e-05	2415.26	2788.65	2749.54	2709.78	2988.95	3494.15	3126.79	3624.88	3662.83	Rpl35	NA	ribosomal protein L35 [Source:MGI Symbol;Acc:MGI:1913739]
ENSMUSG00000002413	2090.79	0.240859	0.0464913	5.18073	2.21023e-07	3.72125e-05	2142.5	2153.77	2276.58	2337.96	2310.64	1859.63	1957.32	1950.35	1828.33	Braf	109880	Braf transforming gene [Source:MGI Symbol;Acc:MGI:88190]
ENSMUSG00000020422	1265.56	0.413978	0.0800893	5.16895	2.35408e-07	3.81614e-05	1272.2	1404.71	1412.5	1442.55	1583.03	1011.81	1199.04	1106.81	957.4	Tns3	319939	tensin 3 [Source:MGI Symbol;Acc:MGI:2443012]
ENSMUSG00000020538	2371.78	0.242923	0.0469789	5.17091	2.32962e-07	3.81614e-05	2561.75	2398.55	2640.07	2565.05	2575.39	2264.97	2026.35	2163.47	2150.4	Srebf1	20787	sterol regulatory element binding transcription factor 1 [Source:MGI Symbol;Acc:MGI:107606]
ENSMUSG00000040265	1091.27	0.308683	0.0597227	5.16861	2.35848e-07	3.81614e-05	1171.97	1265.45	1143.6	1231.93	1153.95	951.472	945.628	1045.92	911.516	Dnm3	103967	dynamin 3 [Source:MGI Symbol;Acc:MGI:1341299]
ENSMUSG00000000823	2254.74	0.217706	0.042316	5.14476	2.67856e-07	4.27512e-05	2381.52	2491.11	2330.78	2439.15	2379.11	2054.56	2048.04	1992.43	2175.99	Zfp512b	269401	zinc finger protein 512B [Source:MGI Symbol;Acc:MGI:2685478]
ENSMUSG00000032384	741.319	0.28848	0.0561229	5.14016	2.74508e-07	4.27512e-05	763.321	826.044	817.315	824.817	800.645	662.936	648.825	661.756	666.21	Csnk1g1	214897	casein kinase 1, gamma 1 [Source:MGI Symbol;Acc:MGI:2660884]
ENSMUSG00000034656	683.799	0.352276	0.0685273	5.14067	2.73764e-07	4.27512e-05	690.073	822.584	770.551	781.282	719.393	598.731	576.843	601.759	592.971	Cacna1a	12286	calcium channel, voltage-dependent, P/Q type, alpha 1A subunit [Source:MGI Symbol;Acc:MGI:109482]
ENSMUSG00000036026	2047.17	0.229748	0.0448436	5.12331	3.00216e-07	4.61776e-05	2197.44	2313.79	2145.85	2201.47	2094.27	1916.87	1849.84	1799.01	1905.98	Tmem63b	224807	transmembrane protein 63b [Source:MGI Symbol;Acc:MGI:2387609]
ENSMUSG00000020889	454.908	0.485066	0.0947273	5.12066	3.04471e-07	4.6261e-05	437.56	524.17	557.985	513.01	573.324	409.21	359.911	351.922	367.077	Nr1d1	217166	nuclear receptor subfamily 1, group D, member 1 [Source:MGI Symbol;Acc:MGI:2444210]
ENSMUSG00000031197	1662.46	-0.222046	0.0436647	-5.08525	3.6715e-07	5.51124e-05	1531.46	1537.05	1570.86	1609.63	1494.48	1805.48	1743.35	1871.54	1798.32	Vbp1	22327	von Hippel-Lindau binding protein 1 [Source:MGI Symbol;Acc:MGI:1333804]
ENSMUSG00000036916	827.327	0.297038	0.0584626	5.08083	3.75793e-07	5.57382e-05	841.388	903.891	917.221	936.597	912.936	756.536	690.24	745.035	742.096	Zfp280c	208968	zinc finger protein 280C [Source:MGI Symbol;Acc:MGI:2387585]
ENSMUSG00000022246	1119.14	0.351034	0.0693334	5.06298	4.1275e-07	6.04994e-05	1288.59	1226.52	1279.65	1207.22	1185.9	937.548	1105.37	962.636	878.867	Rai14	75646	retinoic acid induced 14 [Source:MGI Symbol;Acc:MGI:1922896]
ENSMUSG00000028613	3838.8	0.222596	0.0440443	5.05391	4.3286e-07	6.27094e-05	4080.68	4363.76	4192.86	3833.46	4023.31	3552.94	3434.43	3609.66	3458.11	Lrp8	16975	low density lipoprotein receptor-related protein 8, apolipoprotein e receptor [Source:MGI Symbol;Acc:MGI:1340044]
ENSMUSG00000051278	1293.14	0.295267	0.0591079	4.99539	5.87185e-07	8.40889e-05	1313.64	1358.86	1534.72	1408.42	1431.48	1207.52	1165.52	1127.4	1090.64	Zgrf1	71643	zinc finger, GRF-type containing 1 [Source:MGI Symbol;Acc:MGI:1918893]
ENSMUSG00000038369	2624.98	0.206398	0.0413695	4.98913	6.06524e-07	8.54162e-05	2719.81	2851.8	2812.24	2714.48	2849.27	2398.02	2546	2419.57	2313.64	Ncoa6	56406	nuclear receptor coactivator 6 [Source:MGI Symbol;Acc:MGI:1929915]
ENSMUSG00000042363	1784.28	-0.337882	0.0677393	-4.98797	6.10165e-07	8.54162e-05	1778.19	1588.94	1558.11	1496.67	1562.95	2068.48	1788.71	2138.39	2078.04	Lgalsl	216551	lectin, galactoside binding-like [Source:MGI Symbol;Acc:MGI:1916114]
ENSMUSG00000029822	421.667	0.36603	0.0734581	4.98284	6.26589e-07	8.67408e-05	465.51	467.947	493.152	468.298	448.252	380.589	343.148	371.622	356.488	Osbpl3	71720	oxysterol binding protein-like 3 [Source:MGI Symbol;Acc:MGI:1918970]
ENSMUSG00000028760	4854.52	0.186536	0.0376086	4.95993	7.05178e-07	9.65474e-05	5048.33	5136.18	5088.82	5344.25	5038.49	4514.46	4748.85	4371.71	4399.63	Eif4g3	230861	eukaryotic translation initiation factor 4 gamma, 3 [Source:MGI Symbol;Acc:MGI:1923935]
ENSMUSG00000036057	1342.62	0.256047	0.051716	4.95103	7.38209e-07	9.97387e-05	1434.12	1448.82	1438.01	1448.43	1468	1281.01	1216.79	1110.39	1238	Ptpn23	104831	protein tyrosine phosphatase, non-receptor type 23 [Source:MGI Symbol;Acc:MGI:2144837]
ENSMUSG00000037742	54683.5	-0.237703	0.0480269	-4.94938	7.44498e-07	9.97387e-05	46061.4	52377.2	53744	49239.6	51832.8	57687.8	58745.3	61953.5	60509.5	Eef1a1	13627	eukaryotic translation elongation factor 1 alpha 1 [Source:MGI Symbol;Acc:MGI:1096881]
ENSMUSG00000033597	1083.53	0.327657	0.0663422	4.93889	7.85681e-07	0.000104136	1115.1	1289.67	1179.74	1222.52	1148.47	909.7	882.521	973.382	1030.64	Caskin1	268932	CASK interacting protein 1 [Source:MGI Symbol;Acc:MGI:2442952]
ENSMUSG00000027254	2072.35	0.261471	0.0530913	4.92493	8.43888e-07	0.000110674	2317.91	2275.73	2181.99	2192.06	2213.87	1767.57	2060.86	1838.41	1802.74	Map1a	17754	microtubule-associated protein 1 A [Source:MGI Symbol;Acc:MGI:1306776]
ENSMUSG00000032637	3699.67	0.245738	0.0499341	4.92123	8.60003e-07	0.000111612	4007.44	3857.75	3876.14	4139.38	4005.05	3611.73	3355.55	3072.38	3371.64	Atxn2l	233871	ataxin 2-like [Source:MGI Symbol;Acc:MGI:2446242]
ENSMUSG00000038252	6142.94	0.280021	0.0570569	4.90775	9.21271e-07	0.000118331	6114.28	6460.44	7161.34	6839.74	6755.73	5978.8	5472.61	5157.04	5346.44	Ncapd2	68298	non-SMC condensin I complex, subunit D2 [Source:MGI Symbol;Acc:MGI:1915548]
ENSMUSG00000003847	1869.63	0.29291	0.0600105	4.88098	1.0556e-06	0.000134201	1986.37	1953.96	2019.37	2087.34	2130.79	1605.9	1828.15	1704.09	1510.66	Nfat5	54446	nuclear factor of activated T cells 5 [Source:MGI Symbol;Acc:MGI:1859333]
ENSMUSG00000035125	368.328	0.435215	0.0892158	4.87823	1.07042e-06	0.000134711	401.9	427.294	411.315	465.945	377.955	313.29	290.887	292.82	333.546	Gcfc2	330361	GC-rich sequence DNA binding factor 2 [Source:MGI Symbol;Acc:MGI:2141656]
ENSMUSG00000027490	2450.05	0.300036	0.0616634	4.86571	1.14046e-06	0.000140683	2634.04	2566.36	2914.28	2667.42	2587.26	2422	2128.9	2036.31	2093.93	E2f1	13555	E2F transcription factor 1 [Source:MGI Symbol;Acc:MGI:101941]
ENSMUSG00000041164	3495.77	0.224738	0.0461742	4.86718	1.132e-06	0.000140683	3630.59	4035.94	3567.92	3694.61	3744.86	3293.02	3269.76	3075.96	3149.27	Zmiz2	52915	zinc finger, MIZ-type containing 2 [Source:MGI Symbol;Acc:MGI:106374]
ENSMUSG00000030409	308.227	0.524966	0.108103	4.85616	1.19682e-06	0.000146189	303.594	369.341	382.618	352.989	374.304	228.199	221.863	257.001	284.132	Dmpk	13400	dystrophia myotonica-protein kinase [Source:MGI Symbol;Acc:MGI:94906]
ENSMUSG00000026393	957.241	-0.29757	0.0613098	-4.85354	1.21278e-06	0.000146699	872.229	801.825	918.284	884.825	869.115	1070.6	1037.33	1146.21	1014.76	Nek7	59125	NIMA (never in mitosis gene a)-related expressed kinase 7 [Source:MGI Symbol;Acc:MGI:1890645]
ENSMUSG00000006494	882.196	0.502391	0.103868	4.83683	1.31927e-06	0.000156627	1058.24	1114.08	1144.67	882.472	872.767	625.806	785.887	778.168	677.681	Pdk1	228026	pyruvate dehydrogenase kinase, isoenzyme 1 [Source:MGI Symbol;Acc:MGI:1926119]
ENSMUSG00000012483	441.645	-0.398216	0.0823639	-4.83483	1.33257e-06	0.000156627	389.371	350.312	418.754	400.054	378.868	520.602	461.474	545.344	510.025	Rpa3	68240	replication protein A3 [Source:MGI Symbol;Acc:MGI:1915490]
ENSMUSG00000022389	1326.74	0.232398	0.0480491	4.83667	1.32032e-06	0.000156627	1414.84	1476.5	1453.95	1329.59	1426.01	1195.92	1191.16	1241.13	1211.53	Tef	21685	thyrotroph embryonic factor [Source:MGI Symbol;Acc:MGI:98663]
ENSMUSG00000063457	6818.18	-0.30745	0.0636789	-4.82812	1.37826e-06	0.000160483	5520.58	6081.59	6270.69	6140.83	6822.37	7458.61	6991.14	8014.5	8063.34	Rps15	20054	ribosomal protein S15 [Source:MGI Symbol;Acc:MGI:98117]
ENSMUSG00000103047	134.686	0.729454	0.151304	4.82113	1.42745e-06	0.000164673	121.437	166.074	177.492	172.964	179.848	92.8265	91.7033	108.353	101.476	Gm37310	NA	predicted gene, 37310 [Source:MGI Symbol;Acc:MGI:5610538]
ENSMUSG00000037058	3350.46	-0.247622	0.0514867	-4.80944	1.51353e-06	0.000173	3240.26	2984.14	3149.16	3094.53	2999.91	3672.06	3338.79	3879.2	3796.07	Paip2	67869	polyadenylate-binding protein-interacting protein 2 [Source:MGI Symbol;Acc:MGI:1915119]
ENSMUSG00000041096	876.373	0.253453	0.0527938	4.8008	1.58029e-06	0.00017899	944.513	920.325	933.163	990.721	933.02	808.365	803.636	765.631	787.98	Tspyl2	52808	TSPY-like 2 [Source:MGI Symbol;Acc:MGI:106244]
ENSMUSG00000009927	4163.78	-0.338492	0.0708804	-4.77553	1.79231e-06	0.000201174	3323.14	3741.85	3859.13	3644.02	4061.65	4634.37	4148.34	4984.22	5077.31	Rps25	NA	ribosomal protein S25 [Source:MGI Symbol;Acc:MGI:1922867]
ENSMUSG00000009741	2357.11	0.207522	0.0435759	4.76231	1.91392e-06	0.000210411	2401.76	2531.76	2629.44	2552.11	2419.28	2236.35	2201.86	2099.89	2141.58	Ubp1	22221	upstream binding protein 1 [Source:MGI Symbol;Acc:MGI:104889]
ENSMUSG00000039001	2895.81	-0.329432	0.0691921	-4.76111	1.92527e-06	0.000210411	2281.29	2716	2709.15	2581.52	2709.59	3191.69	2931.55	3542.5	3398.99	Rps21	66481	ribosomal protein S21 [Source:MGI Symbol;Acc:MGI:1913731]
ENSMUSG00000044349	4068.18	0.416956	0.0875376	4.76317	1.90577e-06	0.000210411	3989.12	4453.72	4757.22	5492.5	4205.9	3634.16	3206.66	3176.25	3698.12	Snhg11	319317	small nucleolar RNA host gene 11 [Source:MGI Symbol;Acc:MGI:2441845]
ENSMUSG00000020185	919.074	0.297058	0.0624442	4.75717	1.96328e-06	0.000212113	1079.44	931.57	986.305	1015.43	998.752	867.155	823.357	776.377	793.275	E2f7	52679	E2F transcription factor 7 [Source:MGI Symbol;Acc:MGI:1289147]
ENSMUSG00000061589	1900.27	0.328399	0.0690498	4.75598	1.97489e-06	0.000212113	2313.09	2184.04	2005.56	2001.45	1941.81	1776.85	1746.31	1507.08	1626.26	Dot1l	208266	DOT1-like, histone H3 methyltransferase (S. cerevisiae) [Source:MGI Symbol;Acc:MGI:2143886]
ENSMUSG00000022205	3659.72	-0.284717	0.0599419	-4.74988	2.03535e-06	0.000216739	3038.83	3350.88	3624.24	3416.93	3251.88	3854.62	3853.51	4387.83	4158.74	Sub1	20024	SUB1 homolog, transcriptional regulator [Source:MGI Symbol;Acc:MGI:104811]
ENSMUSG00000038126	1077.9	0.274323	0.0578129	4.74503	2.08481e-06	0.000220124	1190.28	1115.81	1204.18	1135.45	1195.03	1035.79	937.74	984.127	902.692	Mphosph9	269702	M-phase phosphoprotein 9 [Source:MGI Symbol;Acc:MGI:2443138]
ENSMUSG00000038900	4700.32	-0.310901	0.0656338	-4.73689	2.17018e-06	0.000227212	3833.95	4195.09	4221.55	4309.99	4672.41	5180.49	4736.03	5485.68	5667.63	Rpl12	NA	ribosomal protein L12 [Source:MGI Symbol;Acc:MGI:98002]
ENSMUSG00000058153	1762.21	0.253283	0.053581	4.72711	2.27734e-06	0.000236444	1835.05	2077.65	1803.62	1936.73	1835.91	1588.11	1585.58	1649.47	1547.72	Sez6l	56747	seizure related 6 homolog like [Source:MGI Symbol;Acc:MGI:1935121]
ENSMUSG00000012848	8679.35	-0.296239	0.0629503	-4.70592	2.5273e-06	0.000260228	7421.18	7882.45	8111.51	7719.86	8270.29	9347.63	8562.91	10048.1	10750.2	Rps5	20103	ribosomal protein S5 [Source:MGI Symbol;Acc:MGI:1097682]
ENSMUSG00000048154	3194.22	0.274686	0.058416	4.70225	2.57313e-06	0.000262776	3868.65	3192.59	3463.76	3301.62	3476.46	2757.72	2954.23	2778.66	2954.26	Kmt2d	381022	lysine (K)-specific methyltransferase 2D [Source:MGI Symbol;Acc:MGI:2682319]
ENSMUSG00000023473	1786.06	0.316138	0.067394	4.69088	2.72027e-06	0.000275544	2046.12	2179.72	1943.91	1820.24	1793.92	1581.92	1654.6	1460.52	1593.61	Celsr3	107934	cadherin, EGF LAG seven-pass G-type receptor 3 [Source:MGI Symbol;Acc:MGI:1858236]
ENSMUSG00000025153	9103.28	0.223133	0.0477487	4.67307	2.96728e-06	0.00029814	10421.5	9884.85	9654.73	8932.97	9714.55	8468.88	8702.94	8061.07	8088.05	Fasn	14104	fatty acid synthase [Source:MGI Symbol;Acc:MGI:95485]
ENSMUSG00000015879	805.328	0.307315	0.0659316	4.66111	3.14506e-06	0.000313474	916.563	890.916	952.294	801.284	839.901	720.953	735.598	710.112	680.328	Fam184b	58227	family with sequence similarity 184, member B [Source:MGI Symbol;Acc:MGI:2442958]
ENSMUSG00000052632	1246.16	0.279994	0.0601551	4.65453	3.24714e-06	0.00032108	1374.36	1242.96	1324.28	1459.02	1361.19	1098.45	1196.09	1075.47	1083.58	Asap2	211914	ArfGAP with SH3 domain, ankyrin repeat and PH domain 2 [Source:MGI Symbol;Acc:MGI:2685438]
ENSMUSG00000062296	387.933	0.58048	0.125179	4.63718	3.53195e-06	0.000346493	447.198	577.798	448.514	414.173	386.172	286.215	269.193	325.058	337.076	Trank1	320429	tetratricopeptide repeat and ankyrin repeat containing 1 [Source:MGI Symbol;Acc:MGI:1341834]
ENSMUSG00000031074	172.676	-0.658095	0.142034	-4.63337	3.59755e-06	0.000347456	120.474	124.555	111.597	172.964	157.938	207.313	230.737	218.496	210.01	Fgf3	NA	fibroblast growth factor 3 [Source:MGI Symbol;Acc:MGI:95517]
ENSMUSG00000068036	3756.99	0.231601	0.0499765	4.63419	3.58345e-06	0.000347456	3892.74	4218.45	4189.67	3902.88	3902.8	3213.35	3666.16	3486.98	3339.87	Afdn	17356	afadin, adherens junction formation factor [Source:MGI Symbol;Acc:MGI:1314653]
ENSMUSG00000023912	980.388	0.237108	0.0514249	4.61076	4.01191e-06	0.000381772	1085.23	1010.28	1038.38	1051.91	1071.79	927.492	875.618	890.102	872.69	Slc25a27	74011	solute carrier family 25, member 27 [Source:MGI Symbol;Acc:MGI:1921261]
ENSMUSG00000030310	4084.35	0.263605	0.0571731	4.61065	4.01414e-06	0.000381772	4970.26	4197.69	4287.45	4354.7	4250.63	3887.89	3583.33	3529.07	3698.12	Slc6a1	232333	solute carrier family 6 (neurotransmitter transporter, GABA), member 1 [Source:MGI Symbol;Acc:MGI:95627]
ENSMUSG00000008668	4577.34	-0.294459	0.0638965	-4.60837	4.05835e-06	0.000382096	3791.55	4147.52	4318.27	4107.61	4429.56	4915.17	4635.45	5202.71	5648.22	Rps18	20084	ribosomal protein S18 [Source:MGI Symbol;Acc:MGI:98146]
ENSMUSG00000028936	4316.68	-0.289297	0.0628119	-4.60576	4.10955e-06	0.000382096	3602.64	4094.76	3974.98	3805.22	4165.73	4517.56	4422.46	5202.71	5064.07	Rpl22	19934	ribosomal protein L22 [Source:MGI Symbol;Acc:MGI:99262]
ENSMUSG00000038375	1559.78	0.301054	0.0653556	4.6064	4.09707e-06	0.000382096	1886.14	1734.26	1758.98	1550.8	1581.2	1424.89	1305.54	1381.72	1414.48	Trp53inp2	68728	transformation related protein 53 inducible nuclear protein 2 [Source:MGI Symbol;Acc:MGI:1915978]
ENSMUSG00000033902	1342.03	0.225401	0.0489847	4.60146	4.19533e-06	0.000387182	1506.4	1488.61	1371.05	1424.9	1378.53	1215.25	1234.54	1248.29	1210.65	Mapkbp1	26390	mitogen-activated protein kinase binding protein 1 [Source:MGI Symbol;Acc:MGI:1347004]
ENSMUSG00000040524	3076.79	0.181277	0.0394654	4.59333	4.36238e-06	0.000399639	3297.12	3163.19	3293.71	3101.59	3376.95	2827.34	2955.21	2870.89	2805.14	Zfp609	214812	zinc finger protein 609 [Source:MGI Symbol;Acc:MGI:2674092]
ENSMUSG00000025892	1255.79	0.264728	0.0576958	4.58834	4.4678e-06	0.000406309	1377.25	1366.65	1342.35	1429.6	1270.81	1120.88	1056.07	1219.64	1118.88	Gria4	14802	glutamate receptor, ionotropic, AMPA4 (alpha 4) [Source:MGI Symbol;Acc:MGI:95811]
ENSMUSG00000053007	84.3483	0.751589	0.164001	4.58284	4.58707e-06	0.000414132	109.872	98.6063	91.4032	108.25	105.901	52.6017	69.024	56.4149	67.0622	Creb5	231991	cAMP responsive element binding protein 5 [Source:MGI Symbol;Acc:MGI:2443973]
ENSMUSG00000025161	688.836	0.647498	0.14171	4.56918	4.89641e-06	0.00043888	1070.77	835.558	917.221	653.029	627.187	577.072	520.638	487.139	510.908	Slc16a3	80879	solute carrier family 16 (monocarboxylic acid transporters), member 3 [Source:MGI Symbol;Acc:MGI:1933438]
ENSMUSG00000049504	932.506	0.26727	0.0587134	4.55212	5.31083e-06	0.000472626	1008.12	945.409	977.802	1033.08	1078.18	870.249	847.023	803.241	829.453	Proser1	212127	proline and serine rich 1 [Source:MGI Symbol;Acc:MGI:1919933]
ENSMUSG00000024050	2546	0.220955	0.0485652	4.54965	5.37344e-06	0.000474806	2595.48	2714.27	2559.29	2865.09	2853.84	2380.23	2400.06	2271.82	2273.94	Wiz	22404	widely-interspaced zinc finger motifs [Source:MGI Symbol;Acc:MGI:1332638]
ENSMUSG00000034543	1715.7	0.22361	0.0492235	4.54275	5.55259e-06	0.000480709	1735.78	1871.79	1866.33	1930.85	1759.23	1498.38	1573.75	1593.05	1612.14	Morc2a	74522	microrchidia 2A [Source:MGI Symbol;Acc:MGI:1921772]
ENSMUSG00000047215	6298.72	-0.27851	0.0612717	-4.5455	5.48061e-06	0.000480709	5257.47	5729.54	5776.47	5811.37	6197.01	6948.84	6249.63	7174.55	7543.61	Rpl9	20005	ribosomal protein L9 [Source:MGI Symbol;Acc:MGI:1298373]
ENSMUSG00000090733	3975.58	-0.342606	0.0754203	-4.54262	5.556e-06	0.000480709	3137.13	3454.68	3570.04	3612.25	3987.7	4162.5	4155.24	4986.9	4713.76	Rps27	57294	ribosomal protein S27 [Source:MGI Symbol;Acc:MGI:1888676]
ENSMUSG00000050967	192.198	0.725903	0.159909	4.53946	5.63973e-06	0.000484589	240.947	198.078	180.681	277.684	268.403	144.655	169.602	121.785	127.948	Creg2	263764	cellular repressor of E1A-stimulated genes 2 [Source:MGI Symbol;Acc:MGI:1928333]
ENSMUSG00000090086	984.392	0.328642	0.0724853	4.53391	5.7903e-06	0.000494119	1141.13	1052.67	1024.57	1135.45	1059.92	949.151	880.548	754.886	861.219	AI480526	NA	expressed sequence AI480526 [Source:MGI Symbol;Acc:MGI:2140910]
ENSMUSG00000039741	2487.36	0.218904	0.0484245	4.52052	6.16877e-06	0.000522835	2603.19	2515.32	2625.19	2700.36	2823.71	2238.67	2232.43	2222.57	2424.83	Bahcc1	268515	BAH domain and coiled-coil containing 1 [Source:MGI Symbol;Acc:MGI:2679272]
ENSMUSG00000032399	15567.2	-0.220834	0.048964	-4.51012	6.47909e-06	0.000545426	13408.2	14305.7	15286.7	14569	14937.5	16153.4	16135.8	17451.9	17857.1	Rpl4	67891	ribosomal protein L4 [Source:MGI Symbol;Acc:MGI:1915141]
ENSMUSG00000061787	3451.48	-0.305701	0.0678325	-4.5067	6.58426e-06	0.000550559	2819.08	3196.92	3234.19	3039.23	3329.48	3734.72	3460.07	3993.82	4255.8	Rps17	20068	ribosomal protein S17 [Source:MGI Symbol;Acc:MGI:1309526]
ENSMUSG00000036990	2232	0.179999	0.0400126	4.49854	6.84205e-06	0.000568301	2318.88	2361.36	2401.99	2401.5	2291.47	2119.54	2147.63	2042.58	2003.04	Otud4	73945	OTU domain containing 4 [Source:MGI Symbol;Acc:MGI:1098801]
ENSMUSG00000032965	409.627	-0.325525	0.0725043	-4.48973	7.13136e-06	0.000588408	372.023	373.666	352.859	370.638	370.652	452.529	492.042	452.215	450.022	Ift57	73916	intraflagellar transport 57 [Source:MGI Symbol;Acc:MGI:1921166]
ENSMUSG00000012405	2574.95	-0.254511	0.0567313	-4.48625	7.24881e-06	0.000594164	2245.63	2369.15	2411.56	2263.83	2566.26	2711.31	2655.45	2991.78	2959.56	Rpl15	66480	ribosomal protein L15 [Source:MGI Symbol;Acc:MGI:1913730]
ENSMUSG00000037627	161.405	0.562821	0.125502	4.48455	7.30663e-06	0.000594989	191.794	169.534	177.492	185.907	217.279	126.863	131.146	138.799	113.829	Rgs22	626596	regulator of G-protein signalling 22 [Source:MGI Symbol;Acc:MGI:3613651]
ENSMUSG00000030744	11948.1	-0.347294	0.0775465	-4.47853	7.51579e-06	0.000600533	10212.3	10397.8	10691	10159	11833.5	13091.6	11516.2	14110	15521.4	Rps3	27050	ribosomal protein S3 [Source:MGI Symbol;Acc:MGI:1350917]
ENSMUSG00000039801	1289	0.245188	0.0547486	4.47843	7.51932e-06	0.000600533	1336.78	1426.33	1396.56	1356.65	1405.92	1089.94	1267.08	1156.95	1164.76	Cplane1	73692	ciliogenesis and planar polarity effector 1 [Source:MGI Symbol;Acc:MGI:1920942]
ENSMUSG00000056211	2074.96	0.250586	0.0559368	4.47981	7.47106e-06	0.000600533	2321.77	2296.49	2126.72	2206.18	2213.87	1988.04	1995.78	1793.64	1732.14	R3hdm1	226412	R3H domain containing 1 [Source:MGI Symbol;Acc:MGI:2448514]
ENSMUSG00000045287	651.049	-0.297651	0.0665169	-4.47481	7.64777e-06	0.000606902	613.934	536.28	571.802	628.32	606.189	726.368	702.072	724.439	750.037	Rtn4rl1	237847	reticulon 4 receptor-like 1 [Source:MGI Symbol;Acc:MGI:2661375]
ENSMUSG00000020460	4551.79	-0.336999	0.0756104	-4.45705	8.30968e-06	0.000651306	3565.06	4041.99	4343.78	4088.79	4336.45	4624.31	4783.36	5665.67	5516.74	Rps27a	78294	ribosomal protein S27A [Source:MGI Symbol;Acc:MGI:1925544]
ENSMUSG00000038690	1719.01	-0.302716	0.0679194	-4.45699	8.31187e-06	0.000651306	1451.47	1541.37	1672.89	1473.14	1647.85	1822.49	1758.14	2037.21	2066.57	Atp5j2	NA	ATP synthase, H+ transporting, mitochondrial F0 complex, subunit F2 [Source:MGI Symbol;Acc:MGI:1927558]
ENSMUSG00000036781	914.636	-0.356147	0.079933	-4.45556	8.36738e-06	0.000651557	751.756	730.032	895.964	788.341	901.981	1033.47	976.196	1030.69	1123.29	Rps27l	67941	ribosomal protein S27-like [Source:MGI Symbol;Acc:MGI:1915191]
ENSMUSG00000103651	236.278	0.489195	0.109831	4.45409	8.42504e-06	0.000651973	234.201	257.76	301.843	292.981	269.316	208.086	184.393	198.796	179.127	Gm37206	NA	predicted gene, 37206 [Source:MGI Symbol;Acc:MGI:5610434]
ENSMUSG00000025794	3869.45	-0.245572	0.0552294	-4.44639	8.73256e-06	0.000667478	3311.58	3507.44	3440.38	3732.27	3882.72	4211.23	4026.07	4209.63	4503.75	Rpl14	67115	ribosomal protein L14 [Source:MGI Symbol;Acc:MGI:1914365]
ENSMUSG00000041301	95.7465	0.731208	0.164413	4.44738	8.69229e-06	0.000667478	126.256	96.0114	115.848	136.489	107.726	76.5819	72.9682	68.9516	60.8854	Cftr	12638	cystic fibrosis transmembrane conductance regulator [Source:MGI Symbol;Acc:MGI:88388]
ENSMUSG00000027411	1426.52	0.223854	0.0503863	4.44275	8.88144e-06	0.000674719	1498.69	1524.07	1501.78	1535.5	1560.21	1387.76	1342.02	1231.28	1257.42	Vps16	80743	VSP16 CORVET/HOPS core subunit [Source:MGI Symbol;Acc:MGI:2136772]
ENSMUSG00000033004	4209.51	0.226132	0.0509481	4.43847	9.0599e-06	0.000679983	4349.58	4828.25	4571.23	4293.52	4450.56	3548.29	4025.08	3940.99	3878.13	Mycbp2	105689	MYC binding protein 2, E3 ubiquitin protein ligase [Source:MGI Symbol;Acc:MGI:2179432]
ENSMUSG00000039323	1401.24	0.302877	0.0682355	4.4387	9.05024e-06	0.000679983	1485.2	1671.12	1583.61	1482.55	1426.01	1130.94	1202	1281.43	1348.3	Igfbp2	16008	insulin-like growth factor binding protein 2 [Source:MGI Symbol;Acc:MGI:96437]
ENSMUSG00000028618	2357.4	-0.156503	0.0352918	-4.43455	9.2265e-06	0.000688341	2234.06	2260.16	2244.69	2265.01	2212.04	2459.13	2475.99	2572.7	2492.77	Tmem59	NA	transmembrane protein 59 [Source:MGI Symbol;Acc:MGI:1929278]
ENSMUSG00000004945	991.981	-0.306723	0.0692123	-4.43163	9.35224e-06	0.000693569	817.293	898.701	945.917	873.059	952.192	1053.58	1037.33	1143.52	1206.24	Tmem242	70544	transmembrane protein 242 [Source:MGI Symbol;Acc:MGI:1917794]
ENSMUSG00000015843	501.418	-0.34899	0.0787931	-4.4292	9.45833e-06	0.000696686	460.691	403.94	479.336	451.825	441.861	585.581	513.735	574	601.795	Rxrg	20183	retinoid X receptor gamma [Source:MGI Symbol;Acc:MGI:98216]
ENSMUSG00000026797	5205.17	0.21157	0.0477788	4.42811	9.50611e-06	0.000696686	5889.72	5623.15	5259.94	5365.43	5568	5061.37	4516.14	4671.69	4891.13	Stxbp1	20910	syntaxin binding protein 1 [Source:MGI Symbol;Acc:MGI:107363]
ENSMUSG00000032518	6224.57	-0.222227	0.0502621	-4.42137	9.80788e-06	0.000714075	5575.52	5763.28	5805.17	5657.23	6176.92	6710.59	6196.38	6951.57	7184.47	Rpsa	16785	ribosomal protein SA [Source:MGI Symbol;Acc:MGI:105381]
ENSMUSG00000064125	1634.23	0.270387	0.0611699	4.42026	9.85801e-06	0.000714075	1841.8	1757.61	1643.13	1860.25	1742.79	1623.69	1429.78	1414.85	1394.19	Prr36	73072	proline rich 36 [Source:MGI Symbol;Acc:MGI:3605626]
ENSMUSG00000024078	387.448	-0.331324	0.0750387	-4.41538	1.00831e-05	0.000726156	346	352.907	360.299	338.869	340.525	466.453	426.962	420.873	434.139	Ttc27	74196	tetratricopeptide repeat domain 27 [Source:MGI Symbol;Acc:MGI:1921446]
ENSMUSG00000066392	989.646	0.300216	0.0680768	4.40996	1.03389e-05	0.000740297	1082.34	1127.92	1120.22	1094.26	975.016	923.624	917.033	875.775	790.627	Nrxn3	18191	neurexin III [Source:MGI Symbol;Acc:MGI:1096389]
ENSMUSG00000050822	966.705	0.261534	0.0594383	4.40009	1.08207e-05	0.000761667	1016.8	1146.08	1000.12	1026.02	1027.05	860.193	871.674	843.538	908.869	Slc29a4	243328	solute carrier family 29 (nucleoside transporters), member 4 [Source:MGI Symbol;Acc:MGI:2385330]
ENSMUSG00000059291	4935.54	-0.282231	0.0641249	-4.40127	1.07618e-05	0.000761667	4019.96	4507.34	4565.91	4591.21	4832.17	5391.68	4920.42	5738.21	5852.94	Rpl11	67025	ribosomal protein L11 [Source:MGI Symbol;Acc:MGI:1914275]
ENSMUSG00000062785	342.691	0.51354	0.116656	4.40218	1.07171e-05	0.000761667	374.914	392.695	395.372	462.415	353.306	320.252	261.305	229.242	294.721	Kcnc3	16504	potassium voltage gated channel, Shaw-related subfamily, member 3 [Source:MGI Symbol;Acc:MGI:96669]
ENSMUSG00000058267	636.129	-0.348728	0.0793428	-4.39521	1.10667e-05	0.00077461	505.989	566.554	627.069	530.66	605.276	691.558	684.323	753.99	759.744	Mrps14	NA	mitochondrial ribosomal protein S14 [Source:MGI Symbol;Acc:MGI:1928141]
ENSMUSG00000026640	2781.83	0.288947	0.0658535	4.38772	1.14543e-05	0.000784113	3002.2	3416.62	3013.12	2838.03	2855.66	2275.02	2604.18	2610.31	2421.3	Plxna2	18845	plexin A2 [Source:MGI Symbol;Acc:MGI:107684]
ENSMUSG00000029614	4491.2	-0.193843	0.0441598	-4.38958	1.13572e-05	0.000784113	3973.7	4195.09	4254.5	4453.54	4234.2	4819.24	4601.93	4804.22	5084.37	Rpl6	19988	ribosomal protein L6 [Source:MGI Symbol;Acc:MGI:108057]
ENSMUSG00000037563	3080.17	-0.275999	0.0628903	-4.38858	1.14091e-05	0.000784113	2480.79	2907.16	3088.58	2802.73	2802.71	3270.59	3257.93	3552.35	3558.71	Rps16	NA	ribosomal protein S16 [Source:MGI Symbol;Acc:MGI:98118]
ENSMUSG00000057841	5565.58	-0.274686	0.0625871	-4.38886	1.13947e-05	0.000784113	4482.58	5076.49	5221.68	5120.69	5554.3	6063.89	5703.35	6352.5	6514.74	Rpl32	19951	ribosomal protein L32 [Source:MGI Symbol;Acc:MGI:98038]
ENSMUSG00000055296	1425.22	0.311039	0.0709145	4.38612	1.15393e-05	0.000785616	1439.9	1697.07	1649.51	1471.96	1537.38	1243.88	1400.2	1220.53	1166.53	Tmem245	242474	transmembrane protein 245 [Source:MGI Symbol;Acc:MGI:2445107]
ENSMUSG00000037486	1211.64	0.198095	0.0451808	4.38449	1.16256e-05	0.00078719	1277.98	1264.58	1304.09	1273.11	1303.67	1110.82	1161.57	1108.6	1100.35	Asxl2	75302	additional sex combs like 2, transcriptional regulator [Source:MGI Symbol;Acc:MGI:1922552]
ENSMUSG00000038332	886.988	-0.269385	0.0614874	-4.38114	1.1806e-05	0.000795089	844.279	797.5	807.75	773.045	841.727	1035.79	931.823	1027.11	923.869	Sesn1	140742	sestrin 1 [Source:MGI Symbol;Acc:MGI:2155278]
ENSMUSG00000039637	577.762	0.322068	0.0735475	4.37905	1.19198e-05	0.000798436	560.925	682.459	648.325	630.673	648.184	513.64	499.931	488.929	526.791	Coro7	NA	coronin 7 [Source:MGI Symbol;Acc:MGI:1926135]
ENSMUSG00000081281	474.313	-0.318397	0.072807	-4.37317	1.22457e-05	0.000815877	455.872	403.075	394.309	443.589	440.035	521.376	550.22	522.958	537.38	Gm6274	NA	predicted gene 6274 [Source:MGI Symbol;Acc:MGI:3645367]
ENSMUSG00000020330	1029.09	-0.359537	0.08227	-4.37021	1.24126e-05	0.000822597	1062.1	801.825	910.844	854.233	942.15	1238.46	1115.23	1112.18	1224.77	Hmmr	15366	hyaluronan mediated motility receptor (RHAMM) [Source:MGI Symbol;Acc:MGI:104667]
ENSMUSG00000042724	907.631	0.346003	0.0793531	4.3603	1.29885e-05	0.000856207	1036.07	1149.54	1017.13	903.651	904.719	783.611	829.274	758.468	786.215	Map3k9	338372	mitogen-activated protein kinase kinase kinase 9 [Source:MGI Symbol;Acc:MGI:2449952]
ENSMUSG00000025384	664.41	0.327799	0.0753925	4.3479	1.37449e-05	0.000901305	697.783	823.449	731.226	677.738	721.219	618.844	554.164	557.881	597.383	Faap100	71885	Fanconi anemia core complex associated protein 100 [Source:MGI Symbol;Acc:MGI:1919135]
ENSMUSG00000028565	687.047	0.32828	0.07563	4.34061	1.42088e-05	0.000926844	744.045	800.96	696.153	745.983	789.69	668.351	606.425	583.85	547.968	Nfia	18027	nuclear factor I/A [Source:MGI Symbol;Acc:MGI:108056]
ENSMUSG00000047789	800.676	0.318886	0.0736519	4.32964	1.49351e-05	0.000969148	807.655	877.077	923.598	894.238	888.287	716.312	712.919	768.318	617.678	Slc38a9	268706	solute carrier family 38, member 9 [Source:MGI Symbol;Acc:MGI:1918839]
ENSMUSG00000069045	556.519	12.5935	2.91339	4.32262	1.54189e-05	0.000995357	1588.32	1691.01	1728.16	1.17663	0	0	0	0	0	Ddx3y	26900	DEAD (Asp-Glu-Ala-Asp) box polypeptide 3, Y-linked [Source:MGI Symbol;Acc:MGI:1349406]
ENSMUSG00000029505	3765.46	0.194225	0.0450458	4.31172	1.61989e-05	0.00104032	4165.5	3864.67	3948.41	3836.99	4124.64	3436.9	3715.46	3343.7	3452.82	Ep400	75560	E1A binding protein p400 [Source:MGI Symbol;Acc:MGI:1276124]
ENSMUSG00000042249	412.813	0.468748	0.108802	4.30826	1.64546e-05	0.00105132	436.596	537.145	487.838	457.709	434.557	304.007	308.636	340.281	408.55	Grk3	320129	G protein-coupled receptor kinase 3 [Source:MGI Symbol;Acc:MGI:87941]
ENSMUSG00000049517	3264.57	-0.274879	0.0638415	-4.30564	1.66504e-05	0.0010584	2669.7	3056.79	3152.35	2943.93	3107.63	3483.32	3301.32	3797.71	3868.43	Rps23	NA	ribosomal protein S23 [Source:MGI Symbol;Acc:MGI:1913725]
ENSMUSG00000029461	3857.91	0.155902	0.0362209	4.30421	1.67581e-05	0.00105985	4016.11	4099.08	3963.29	4005.24	4121.91	3622.56	3804.21	3598.02	3490.76	Fam168a	319604	family with sequence similarity 168, member A [Source:MGI Symbol;Acc:MGI:2442372]
ENSMUSG00000029033	1331.27	0.254143	0.0590727	4.30221	1.691e-05	0.00106405	1453.39	1588.08	1369.99	1347.24	1409.57	1206.75	1207.92	1156.95	1241.53	Acap3	140500	ArfGAP with coiled-coil, ankyrin repeat and PH domains 3 [Source:MGI Symbol;Acc:MGI:2153589]
ENSMUSG00000024208	479.363	-0.375602	0.0875093	-4.29214	1.7696e-05	0.00110791	379.733	414.319	429.383	409.467	483.856	538.394	502.889	563.254	592.971	Uqcc2	67267	ubiquinol-cytochrome c reductase complex assembly factor 2 [Source:MGI Symbol;Acc:MGI:1914517]
ENSMUSG00000034390	2979.06	0.246276	0.0575024	4.28288	1.84487e-05	0.00114926	3092.8	3408.84	2894.08	3428.7	3188.89	2857.51	2673.2	2632.7	2634.84	Cmip	74440	c-Maf inducing protein [Source:MGI Symbol;Acc:MGI:1921690]
ENSMUSG00000057497	492.637	-0.37785	0.0882606	-4.28107	1.85995e-05	0.00115289	504.062	410.859	463.393	388.288	407.169	592.543	575.857	546.24	545.321	Fam136a	66488	family with sequence similarity 136, member A [Source:MGI Symbol;Acc:MGI:1913738]
ENSMUSG00000006333	7482.2	-0.27043	0.063214	-4.27801	1.8857e-05	0.00116306	6053.56	6863.52	7110.32	6959.76	7284.32	7888.71	7642.92	8638.65	8898.09	Rps9	76846	ribosomal protein S9 [Source:MGI Symbol;Acc:MGI:1924096]
ENSMUSG00000030423	482.447	0.80125	0.187381	4.27605	1.90239e-05	0.00116758	307.449	670.35	702.53	653.029	642.707	324.893	318.496	354.608	367.959	Pop4	66161	processing of precursor 4, ribonuclease P/MRP family, (S. cerevisiae) [Source:MGI Symbol;Acc:MGI:1913411]
ENSMUSG00000003429	4771.22	-0.205131	0.0480472	-4.26937	1.9603e-05	0.00118574	4072.97	4467.56	4559.53	4439.42	4799.3	5101.59	5020.01	5282.41	5198.2	Rps11	27207	ribosomal protein S11 [Source:MGI Symbol;Acc:MGI:1351329]
ENSMUSG00000028060	1954.16	0.260339	0.061002	4.26771	1.97488e-05	0.00118574	1989.26	2047.38	2160.73	2267.36	2083.32	1919.19	1802.51	1622.6	1695.08	Khdc4	74200	KH domain containing 4, pre-mRNA splicing factor [Source:MGI Symbol;Acc:MGI:1921450]
ENSMUSG00000044408	1950.22	-0.222779	0.0522013	-4.26769	1.97506e-05	0.00118574	1908.3	1717.83	1800.43	1832.01	1821.31	2121.09	1949.43	2186.75	2214.82	Sptssa	104725	serine palmitoyltransferase, small subunit A [Source:MGI Symbol;Acc:MGI:1913399]
ENSMUSG00000048271	3400.92	0.279136	0.0654145	4.26718	1.97957e-05	0.00118574	3105.33	3805.86	3781.54	3778.16	3975.84	3008.35	3038.04	3091.18	3023.97	Rbm33	381626	RNA binding motif protein 33 [Source:MGI Symbol;Acc:MGI:1919670]
ENSMUSG00000060938	3011.35	-0.258054	0.0604551	-4.26852	1.96771e-05	0.00118574	2653.31	2653.72	2924.9	2741.55	2879.4	3264.4	2955.21	3479.82	3549.88	Rpl26	19941	ribosomal protein L26 [Source:MGI Symbol;Acc:MGI:106022]
ENSMUSG00000026933	2691.19	0.155697	0.036506	4.26497	1.99925e-05	0.0011918	2770.89	2863.91	2921.72	2788.61	2753.41	2588.31	2509.51	2535.09	2489.24	Camsap1	227634	calmodulin regulated spectrin-associated protein 1 [Source:MGI Symbol;Acc:MGI:3036242]
ENSMUSG00000013033	4538.18	0.21946	0.051584	4.25442	2.09594e-05	0.0012376	4835.33	5201.91	4654.13	4921.84	4593.89	4177.97	4477.68	3961.58	4019.32	Adgrl1	330814	adhesion G protein-coupled receptor L1 [Source:MGI Symbol;Acc:MGI:1929461]
ENSMUSG00000032621	1993.27	0.328267	0.0771567	4.25455	2.09472e-05	0.0012376	1983.48	2162.42	2229.81	2434.45	2149.96	1963.28	1804.48	1662.9	1548.61	Srek1	218543	splicing regulatory glutamine/lysine-rich protein 1 [Source:MGI Symbol;Acc:MGI:2145245]
ENSMUSG00000022257	993.998	0.486476	0.114376	4.2533	2.10644e-05	0.00123793	1252.93	855.453	1009.69	1306.06	1270.81	765.819	847.023	818.464	819.747	Laptm4b	114128	lysosomal-associated protein transmembrane 4B [Source:MGI Symbol;Acc:MGI:1890494]
ENSMUSG00000041729	2777.12	0.254326	0.0598398	4.25012	2.13658e-05	0.00124975	2970.4	2788.65	2919.59	3115.71	3166.97	2640.92	2672.21	2273.61	2446	Coro2b	235431	coronin, actin binding protein, 2B [Source:MGI Symbol;Acc:MGI:2444283]
ENSMUSG00000066306	6975.16	-0.287357	0.0676315	-4.24886	2.14865e-05	0.00125094	7004.82	6097.15	6417.36	5864.32	6380.51	7621.83	6844.22	8066.44	8479.83	Numa1	101706	nuclear mitotic apparatus protein 1 [Source:MGI Symbol;Acc:MGI:2443665]
ENSMUSG00000031818	4804.59	-0.29012	0.0683647	-4.24371	2.1985e-05	0.00127401	4086.47	4464.96	4309.77	4225.27	4772.83	5548.71	4642.35	5345.09	5845.88	Cox4i1	12857	cytochrome c oxidase subunit 4I1 [Source:MGI Symbol;Acc:MGI:88473]
ENSMUSG00000040865	1141.9	0.254245	0.0600175	4.23619	2.27348e-05	0.00131136	1198.95	1155.6	1227.57	1248.4	1320.11	1031.15	1107.34	1021.74	966.224	Ino80d	227195	INO80 complex subunit D [Source:MGI Symbol;Acc:MGI:3027003]
ENSMUSG00000015599	469.519	0.421861	0.0996466	4.23357	2.30011e-05	0.0013206	506.953	619.317	511.22	473.005	533.155	359.703	394.423	376.995	450.905	Ttbk1	106763	tau tubulin kinase 1 [Source:MGI Symbol;Acc:MGI:2147036]
ENSMUSG00000008575	2096.1	0.349063	0.0825184	4.23012	2.33566e-05	0.00133486	2209	2773.95	2196.87	2285.01	2121.66	1970.24	1884.35	1760.5	1663.32	Nfib	18028	nuclear factor I/B [Source:MGI Symbol;Acc:MGI:103188]
ENSMUSG00000039542	9104.54	0.193438	0.0457649	4.22678	2.3706e-05	0.00134865	9754.51	10257.6	9769.52	9257.72	9168.62	8475.84	8953.39	8129.12	8174.52	Ncam1	17967	neural cell adhesion molecule 1 [Source:MGI Symbol;Acc:MGI:97281]
ENSMUSG00000018076	1945.99	0.23406	0.055437	4.22208	2.42054e-05	0.00136554	1926.61	2189.23	2181.99	1968.5	2154.53	1679.39	1782.79	1799.91	1830.97	Med13l	76199	mediator complex subunit 13-like [Source:MGI Symbol;Acc:MGI:2670178]
ENSMUSG00000039221	742.657	-0.320947	0.076019	-4.22193	2.42223e-05	0.00136554	567.672	663.43	670.645	733.04	709.351	806.817	834.204	855.179	843.571	Rpl22l1	68028	ribosomal protein L22 like 1 [Source:MGI Symbol;Acc:MGI:1915278]
ENSMUSG00000024087	967.226	-0.449411	0.106532	-4.21856	2.45871e-05	0.00137987	771.995	765.496	689.776	990.721	943.976	1276.37	1130.02	1054.87	1081.82	Cyp1b1	13078	cytochrome P450, family 1, subfamily b, polypeptide 1 [Source:MGI Symbol;Acc:MGI:88590]
ENSMUSG00000051359	1158.39	0.348108	0.0825615	4.21635	2.48293e-05	0.00138721	1498.69	1254.2	1210.56	1211.93	1226.99	1019.54	881.535	1078.15	1043.88	Ncald	52589	neurocalcin delta [Source:MGI Symbol;Acc:MGI:1196326]
ENSMUSG00000025478	4862.69	0.215124	0.0511092	4.20911	2.56382e-05	0.00142601	5344.21	4915.61	5161.09	5425.44	5066.79	4866.43	4466.84	4232.91	4284.92	Dpysl4	26757	dihydropyrimidinase-like 4 [Source:MGI Symbol;Acc:MGI:1349764]
ENSMUSG00000073616	804.089	-0.346942	0.0826492	-4.19776	2.69565e-05	0.00149267	636.101	730.897	751.42	710.684	758.65	905.832	785.887	978.754	978.578	Cops9	66915	COP9 signalosome subunit 9 [Source:MGI Symbol;Acc:MGI:1914165]
ENSMUSG00000037089	959.541	-0.246136	0.0586507	-4.19665	2.70894e-05	0.00149339	938.731	853.723	848.137	858.939	930.282	1024.96	1051.14	1017.26	1112.7	Slc35b2	73836	solute carrier family 35, member B2 [Source:MGI Symbol;Acc:MGI:1921086]
ENSMUSG00000040940	1239.03	0.278261	0.0663896	4.19133	2.77321e-05	0.00152209	1411.95	1300.91	1226.5	1375.48	1405.92	1209.84	1056.07	1034.27	1130.35	Arhgef1	16801	Rho guanine nucleotide exchange factor (GEF) 1 [Source:MGI Symbol;Acc:MGI:1353510]
ENSMUSG00000042182	182.744	0.790453	0.188772	4.18735	2.82229e-05	0.00154223	167.699	324.363	187.058	230.619	214.54	148.522	138.048	121.785	112.064	Bend6	320705	BEN domain containing 6 [Source:MGI Symbol;Acc:MGI:2444572]
ENSMUSG00000029705	5567.37	0.122811	0.0293376	4.18613	2.83752e-05	0.00154378	5785.63	5672.46	5746.71	5745.48	5933.17	5298.85	5351.33	5185.7	5387.03	Cux1	13047	cut-like homeobox 1 [Source:MGI Symbol;Acc:MGI:88568]
ENSMUSG00000032589	1604.31	0.259456	0.0620527	4.18122	2.89947e-05	0.00157063	1756.02	1947.04	1707.97	1601.39	1638.72	1394.72	1480.07	1456.04	1456.84	Bsn	12217	bassoon [Source:MGI Symbol;Acc:MGI:1277955]
ENSMUSG00000055436	4858.51	0.2151	0.0516206	4.16693	3.08727e-05	0.00166512	4849.79	5182.88	5305.64	5604.28	4948.11	4728.74	4477.68	4264.25	4365.22	Srsf11	69207	serine/arginine-rich splicing factor 11 [Source:MGI Symbol;Acc:MGI:1916457]
ENSMUSG00000025979	1125.32	-0.20476	0.0491894	-4.1627	3.14511e-05	0.00168901	1090.05	1046.61	1039.45	1061.32	1033.44	1228.4	1160.59	1266.2	1201.82	Mob4	19070	MOB family member 4, phocein [Source:MGI Symbol;Acc:MGI:104899]
ENSMUSG00000005442	4270.52	0.212876	0.0511697	4.1602	3.17974e-05	0.00170028	4944.24	4523.78	4377.79	4394.71	4498.95	4215.1	3921.55	3743.09	3815.48	Cic	71722	capicua transcriptional repressor [Source:MGI Symbol;Acc:MGI:1918972]
ENSMUSG00000029638	267.031	0.483832	0.11647	4.15413	3.26522e-05	0.00173852	297.811	316.578	347.545	284.744	282.097	201.898	192.281	262.374	217.952	Glcci1	170772	glucocorticoid induced transcript 1 [Source:MGI Symbol;Acc:MGI:2179717]
ENSMUSG00000023939	261.581	-0.41029	0.0988206	-4.15187	3.29773e-05	0.00174836	252.513	224.027	208.314	228.266	228.234	306.328	271.166	306.253	329.134	Mrpl14	68463	mitochondrial ribosomal protein L14 [Source:MGI Symbol;Acc:MGI:1333864]
ENSMUSG00000032558	205.681	0.420581	0.101374	4.14879	3.34232e-05	0.00176088	221.671	229.216	233.822	234.149	239.189	170.182	191.295	169.245	162.361	Nphp3	74025	nephronophthisis 3 (adolescent) [Source:MGI Symbol;Acc:MGI:1921275]
ENSMUSG00000033253	1289.29	0.278831	0.0672158	4.14829	3.34962e-05	0.00176088	1500.62	1301.78	1380.61	1301.35	1506.34	1128.62	1216.79	1070.09	1197.41	Szt2	230676	SZT2 subunit of KICSTOR complex [Source:MGI Symbol;Acc:MGI:3033336]
ENSMUSG00000036977	337.326	-0.333197	0.0803594	-4.14633	3.37842e-05	0.00176856	320.942	288.899	295.466	296.51	310.398	379.815	360.897	384.159	398.843	Anapc10	68999	anaphase promoting complex subunit 10 [Source:MGI Symbol;Acc:MGI:1916249]
ENSMUSG00000025912	3361.92	0.227922	0.0550811	4.13793	3.50454e-05	0.00182691	3930.33	3422.68	3797.49	3443.99	3383.34	3094.22	3071.57	3168.19	2945.44	Mybl1	17864	myeloblastosis oncogene-like 1 [Source:MGI Symbol;Acc:MGI:99925]
ENSMUSG00000021537	2150.44	-0.271302	0.0655915	-4.13624	3.53044e-05	0.00183274	1751.2	2086.3	2102.27	1974.38	1933.6	2355.47	2172.28	2535.09	2443.36	Cetn3	12626	centrin 3 [Source:MGI Symbol;Acc:MGI:1097706]
ENSMUSG00000041544	533.052	0.295945	0.0716193	4.1322	3.59308e-05	0.00185752	581.165	557.039	567.55	598.904	601.625	498.943	458.516	433.41	500.319	Disp3	242748	dispatched RND transporter family member 3 [Source:MGI Symbol;Acc:MGI:2444403]
ENSMUSG00000049775	7595.04	-0.199509	0.0482985	-4.13076	3.6157e-05	0.00186149	6474.74	7497.54	7018.92	7272.74	7361	7850.03	8238.5	8514.18	8127.76	Tmsb4x	19241	thymosin, beta 4, X chromosome [Source:MGI Symbol;Acc:MGI:99510]
ENSMUSG00000020647	2568.31	0.183551	0.0444609	4.12837	3.65343e-05	0.00187317	2797.88	2820.66	2752.73	2546.22	2641.12	2327.63	2336.95	2446.44	2445.12	Ncoa1	17977	nuclear receptor coactivator 1 [Source:MGI Symbol;Acc:MGI:1276523]
ENSMUSG00000040669	2592.38	0.173212	0.0419787	4.1262	3.68808e-05	0.00188319	2589.7	2875.15	2717.65	2774.49	2692.25	2462.22	2347.8	2443.75	2428.36	Phc1	13619	polyhomeotic 1 [Source:MGI Symbol;Acc:MGI:103248]
ENSMUSG00000032479	5509.58	0.152549	0.0369841	4.12471	3.712e-05	0.00188767	5851.16	5937.14	5427.86	5679.59	5933.17	5168.89	5305.97	5129.28	5153.2	Map4	17758	microtubule-associated protein 4 [Source:MGI Symbol;Acc:MGI:97178]
ENSMUSG00000047909	1248	0.238803	0.0579215	4.12288	3.74171e-05	0.00189504	1331.96	1278.42	1386.99	1395.48	1303.67	1208.29	1182.28	1072.78	1072.11	Ankrd16	320816	ankyrin repeat domain 16 [Source:MGI Symbol;Acc:MGI:2444796]
ENSMUSG00000046049	408.98	-0.510273	0.123961	-4.1164	3.84843e-05	0.0019412	411.538	291.494	357.11	289.451	370.652	478.83	419.074	501.466	561.204	Rp1l1	271209	retinitis pigmentosa 1 homolog like 1 [Source:MGI Symbol;Acc:MGI:2384303]
ENSMUSG00000045128	5205.11	-0.282842	0.0687734	-4.11267	3.91115e-05	0.00196488	4536.56	4549.73	4935.78	4837.12	4883.29	5660.87	4953.95	6048.04	6440.61	Rpl18a	76808	ribosomal protein L18A [Source:MGI Symbol;Acc:MGI:1924058]
ENSMUSG00000014177	393.043	-0.345854	0.0841414	-4.11039	3.9499e-05	0.00197638	397.081	322.633	345.419	348.282	341.438	456.397	428.935	470.124	427.08	Tvp23b	67510	trans-golgi network vesicle protein 23B [Source:MGI Symbol;Acc:MGI:1914760]
ENSMUSG00000026511	782.747	-0.291048	0.0708372	-4.10869	3.97909e-05	0.00198302	642.847	711.868	757.797	714.214	734	833.892	806.594	918.758	924.752	Srp9	27058	signal recognition particle 9 [Source:MGI Symbol;Acc:MGI:1350930]
ENSMUSG00000042185	1268.41	0.180507	0.0439624	4.10594	4.02671e-05	0.00199876	1346.41	1312.16	1348.73	1351.95	1334.71	1194.37	1151.71	1166.8	1208.88	Nfrkb	235134	nuclear factor related to kappa B binding protein [Source:MGI Symbol;Acc:MGI:2442410]
ENSMUSG00000034269	3751.49	0.155551	0.0379318	4.10082	4.11694e-05	0.00203544	3875.4	3838.72	3973.92	3929.94	4033.35	3660.46	3624.74	3428.77	3398.11	Setd5	72895	SET domain containing 5 [Source:MGI Symbol;Acc:MGI:1920145]
ENSMUSG00000028803	661.989	-0.294206	0.0718135	-4.09681	4.18882e-05	0.00206279	670.797	544.929	616.44	594.198	582.453	731.783	706.016	767.422	743.86	Nipal3	74552	NIPA-like domain containing 3 [Source:MGI Symbol;Acc:MGI:1921802]
ENSMUSG00000020372	10678.8	-0.231049	0.0564637	-4.09199	4.27693e-05	0.00209788	9631.14	9684.17	9865.17	9635.41	10751.6	11384.4	10553.8	11943	12660.6	Rack1	NA	receptor for activated C kinase 1 [Source:MGI Symbol;Acc:MGI:101849]
ENSMUSG00000075415	1508.81	0.21946	0.0537409	4.08366	4.43311e-05	0.00216597	1721.33	1600.19	1619.75	1574.33	1535.56	1472.07	1306.52	1387.99	1361.54	Fnbp1	14269	formin binding protein 1 [Source:MGI Symbol;Acc:MGI:109606]
ENSMUSG00000009076	268.814	-0.394602	0.0967643	-4.07797	4.54316e-05	0.00220629	254.44	226.621	232.759	238.856	227.321	306.328	279.054	308.043	345.9	Zmat5	67178	zinc finger, matrin type 5 [Source:MGI Symbol;Acc:MGI:1914428]
ENSMUSG00000022974	2245.09	0.212161	0.0520773	4.07397	4.6219e-05	0.00220629	2527.06	2294.76	2454.07	2333.25	2342.59	2112.58	2172.28	2069.44	1899.8	Paxbp1	67367	PAX3 and PAX7 binding protein 1 [Source:MGI Symbol;Acc:MGI:1914617]
ENSMUSG00000024002	2374.41	0.242722	0.0595714	4.07447	4.61192e-05	0.00220629	2323.7	2493.7	2598.62	2709.78	2626.52	2315.25	2199.89	1995.12	2107.16	Brd4	57261	bromodomain containing 4 [Source:MGI Symbol;Acc:MGI:1888520]
ENSMUSG00000027603	538.086	0.290583	0.0713163	4.07456	4.6101e-05	0.00220629	553.215	596.827	589.87	600.081	587.931	451.756	453.586	486.243	523.261	Ggt7	207182	gamma-glutamyltransferase 7 [Source:MGI Symbol;Acc:MGI:1913385]
ENSMUSG00000031059	1355.11	-0.227828	0.0559094	-4.07495	4.6025e-05	0.00220629	1197.03	1284.48	1280.71	1209.57	1323.76	1427.98	1387.38	1524.1	1560.96	Ndufb11	104130	NADH:ubiquinone oxidoreductase subunit B11 [Source:MGI Symbol;Acc:MGI:1349919]
ENSMUSG00000031347	936.831	-0.255371	0.0626755	-4.07449	4.61158e-05	0.00220629	831.75	819.124	912.97	867.175	884.635	1055.9	932.809	1063.82	1063.29	Cetn2	26370	centrin 2 [Source:MGI Symbol;Acc:MGI:1347085]
ENSMUSG00000031398	1229.79	0.276343	0.0678527	4.07268	4.64744e-05	0.00221002	1301.12	1502.45	1246.7	1349.59	1263.5	1096.13	1178.34	1037.86	1092.41	Plxna3	18846	plexin A3 [Source:MGI Symbol;Acc:MGI:107683]
ENSMUSG00000023571	524.037	-0.489025	0.120577	-4.05571	4.99833e-05	0.0023638	508.881	475.732	504.844	361.225	370.652	619.617	543.317	640.265	691.799	C1qtnf12	67389	C1q and tumor necrosis factor related 12 [Source:MGI Symbol;Acc:MGI:1914639]
ENSMUSG00000025967	4187.12	-0.248815	0.0613732	-4.05412	5.03223e-05	0.0023638	3433.98	3971.93	3896.33	3785.21	4231.46	4588.73	4256.81	4794.37	4725.23	Eef1b2	55949	eukaryotic translation elongation factor 1 beta 2 [Source:MGI Symbol;Acc:MGI:1929520]
ENSMUSG00000027397	2169.96	0.235382	0.0580696	4.05345	5.04673e-05	0.0023638	2050.94	2380.39	2467.89	2343.84	2386.41	2025.17	1882.38	1979	2013.63	Slc20a1	20515	solute carrier family 20, member 1 [Source:MGI Symbol;Acc:MGI:108392]
ENSMUSG00000061477	6067.51	-0.440541	0.10866	-4.05432	5.02798e-05	0.0023638	4320.67	5614.5	5814.73	4886.54	5545.17	6297.51	5863.09	7984.06	8281.29	Rps7	20115	ribosomal protein S7 [Source:MGI Symbol;Acc:MGI:1333818]
ENSMUSG00000034450	459.644	-0.366919	0.0906816	-4.04623	5.20482e-05	0.00242872	416.357	380.586	417.692	383.581	439.122	584.807	450.628	533.703	530.32	Gulo	268756	gulonolactone (L-) oxidase [Source:MGI Symbol;Acc:MGI:1353434]
ENSMUSG00000046613	301.027	0.432733	0.107129	4.03938	5.35932e-05	0.00248222	314.195	351.177	343.294	382.404	311.311	256.047	236.654	222.973	291.191	Vwa5b2	328643	von Willebrand factor A domain containing 5B2 [Source:MGI Symbol;Acc:MGI:2681859]
ENSMUSG00000083563	107.154	-0.590602	0.14619	-4.03996	5.34612e-05	0.00248222	80.9583	96.0114	97.7802	78.8341	83.0772	126.089	151.853	125.367	124.418	Gm13340	NA	predicted gene 13340 [Source:MGI Symbol;Acc:MGI:3650227]
ENSMUSG00000027489	149.906	0.543133	0.134639	4.034	5.48344e-05	0.0025303	202.396	179.913	165.801	160.022	163.416	140.013	106.494	114.621	116.476	Necab3	56846	N-terminal EF-hand calcium binding protein 3 [Source:MGI Symbol;Acc:MGI:1861721]
ENSMUSG00000039716	1093.7	0.365042	0.0908052	4.02005	5.81859e-05	0.00267505	1165.22	1501.58	1151.04	1135.45	1116.52	959.981	999.861	927.712	885.926	Dock3	208869	dedicator of cyto-kinesis 3 [Source:MGI Symbol;Acc:MGI:2429763]
ENSMUSG00000039680	236.556	-0.393867	0.0980246	-4.01804	5.86839e-05	0.00268803	209.142	220.567	183.869	202.38	220.93	276.933	269.193	287.448	258.542	Mrps6	121022	mitochondrial ribosomal protein S6 [Source:MGI Symbol;Acc:MGI:2153111]
ENSMUSG00000101609	832.377	0.465858	0.116007	4.01576	5.92548e-05	0.00270423	721.878	913.405	1000.12	1140.15	968.625	658.295	779.971	688.62	620.325	Kcnq1ot1	NA	KCNQ1 overlapping transcript 1 [Source:MGI Symbol;Acc:MGI:1926855]
ENSMUSG00000020289	424.473	0.306184	0.0763401	4.01079	6.05156e-05	0.00275169	449.126	467.082	479.336	424.763	498.463	389.098	374.701	362.667	375.019	Nprl3	17168	nitrogen permease regulator-like 3 [Source:MGI Symbol;Acc:MGI:109258]
ENSMUSG00000000149	2412.09	0.144786	0.0361191	4.00858	6.10853e-05	0.0027675	2451.88	2503.22	2514.65	2557.99	2568.09	2311.38	2317.23	2240.48	2243.93	Gna12	14673	guanine nucleotide binding protein, alpha 12 [Source:MGI Symbol;Acc:MGI:95767]
ENSMUSG00000002489	1905.84	0.185976	0.0464632	4.00266	6.26343e-05	0.00282739	1973.84	1972.99	2124.59	1942.61	2056.84	1740.5	1693.06	1832.14	1815.97	Tiam1	21844	T cell lymphoma invasion and metastasis 1 [Source:MGI Symbol;Acc:MGI:103306]
ENSMUSG00000060036	6266.11	-0.233111	0.0582716	-4.00043	6.32287e-05	0.00283369	5222.77	6291.77	6222.86	5667.82	5660.2	7214.17	6839.29	6617.56	6658.57	Rpl3	27367	ribosomal protein L3 [Source:MGI Symbol;Acc:MGI:1351605]
ENSMUSG00000062044	1902.97	0.421336	0.105301	4.00125	6.30078e-05	0.00283369	1995.04	2735.89	1931.16	2263.83	1795.74	1721.16	1585.58	1523.2	1575.08	Lmtk3	381983	lemur tyrosine kinase 3 [Source:MGI Symbol;Acc:MGI:3039582]
ENSMUSG00000023456	4378.31	0.258931	0.0648172	3.99478	6.47532e-05	0.00288129	4626.19	4858.52	5403.42	4370	4358.36	3939.71	3785.47	3913.23	4149.91	Tpi1	21991	triosephosphate isomerase 1 [Source:MGI Symbol;Acc:MGI:98797]
ENSMUSG00000028068	1098.57	0.258564	0.0647139	3.9955	6.45584e-05	0.00288129	1254.85	1127.92	1230.76	1160.16	1152.13	1059	1049.16	915.176	937.988	Iqgap3	404710	IQ motif containing GTPase activating protein 3 [Source:MGI Symbol;Acc:MGI:3028642]
ENSMUSG00000025198	380.288	-0.332246	0.0832347	-3.99167	6.56083e-05	0.00290895	326.725	319.173	362.424	354.165	344.177	454.85	445.698	426.246	389.137	Erlin1	226144	ER lipid raft associated 1 [Source:MGI Symbol;Acc:MGI:2387613]
ENSMUSG00000078566	692.627	0.505809	0.126851	3.98741	6.67982e-05	0.0029512	987.884	832.099	872.582	658.912	635.403	539.941	510.777	631.31	564.734	Bnip3	12176	BCL2/adenovirus E1B interacting protein 3 [Source:MGI Symbol;Acc:MGI:109326]
ENSMUSG00000017550	961.625	0.238251	0.0598305	3.9821	6.83085e-05	0.00297222	975.355	998.172	1095.78	1110.74	979.58	868.702	889.423	867.715	869.161	Atad5	237877	ATPase family, AAA domain containing 5 [Source:MGI Symbol;Acc:MGI:2442925]
ENSMUSG00000019854	1150.09	0.22909	0.0575371	3.9816	6.84536e-05	0.00297222	1137.27	1209.22	1218	1335.47	1254.37	1082.98	1063.96	1008.31	1041.23	Reps1	19707	RalBP1 associated Eps domain containing protein [Source:MGI Symbol;Acc:MGI:1196373]
ENSMUSG00000035283	112.342	-0.710124	0.178353	-3.98155	6.84668e-05	0.00297222	73.248	93.4165	94.5917	90.6004	86.7289	153.937	100.578	142.381	175.597	Adrb1	11554	adrenergic receptor, beta 1 [Source:MGI Symbol;Acc:MGI:87937]
ENSMUSG00000051339	878.247	0.308741	0.0775051	3.98349	6.79098e-05	0.00297222	1046.67	885.727	892.776	933.067	1043.49	737.971	734.612	854.283	775.627	2900026A02Rik	243219	RIKEN cDNA 2900026A02 gene [Source:MGI Symbol;Acc:MGI:1920194]
ENSMUSG00000068749	1137.51	-0.210295	0.0528065	-3.98236	6.8233e-05	0.00297222	1051.49	1042.29	1140.41	1011.9	1071.79	1260.89	1177.35	1222.32	1259.18	Psma5	26442	proteasome (prosome, macropain) subunit, alpha type 5 [Source:MGI Symbol;Acc:MGI:1347009]
ENSMUSG00000028809	3970.7	0.240268	0.0603737	3.97969	6.90058e-05	0.00298522	4024.78	4083.51	4169.48	4653.57	4377.53	3854.62	3787.44	3307.89	3477.53	Srrm1	51796	serine/arginine repetitive matrix 1 [Source:MGI Symbol;Acc:MGI:1858303]
ENSMUSG00000022119	1884.86	0.179418	0.0451261	3.97593	7.01043e-05	0.00302225	1921.8	1962.61	1997.05	2077.93	1982.9	1763.7	1811.39	1791.85	1654.49	Rbm26	NA	RNA binding motif protein 26 [Source:MGI Symbol;Acc:MGI:1921463]
ENSMUSG00000036862	1838.82	0.227314	0.0571905	3.97468	7.04726e-05	0.00302765	1996.97	2177.12	1841.88	1830.83	1980.16	1655.41	1693.06	1670.06	1703.91	Dchs1	233651	dachsous cadherin related 1 [Source:MGI Symbol;Acc:MGI:2685011]
ENSMUSG00000022812	5013.33	0.157243	0.0395827	3.97253	7.11133e-05	0.00304468	5192.9	5434.59	5190.85	5125.4	5324.24	4703.21	4941.13	4764.82	4442.87	Gsk3b	56637	glycogen synthase kinase 3 beta [Source:MGI Symbol;Acc:MGI:1861437]
ENSMUSG00000036882	2415.13	0.295151	0.0743349	3.97055	7.17054e-05	0.00305049	2515.49	3094.85	2495.52	2477.98	2572.65	2336.91	2128.9	2005.86	2108.05	Arhgap33	233071	Rho GTPase activating protein 33 [Source:MGI Symbol;Acc:MGI:2673998]
ENSMUSG00000053754	3612.77	0.161271	0.040618	3.97044	7.17388e-05	0.00305049	3579.51	3887.16	3799.61	3704.03	3981.31	3310.04	3391.05	3432.36	3429.88	Chd8	67772	chromodomain helicase DNA binding protein 8 [Source:MGI Symbol;Acc:MGI:1915022]
ENSMUSG00000069049	544.667	12.0069	3.02841	3.96474	7.34763e-05	0.00311375	1575.8	1678.9	1646.32	0	0	0	0.986057	0	0	Eif2s3y	26908	eukaryotic translation initiation factor 2, subunit 3, structural gene Y-linked [Source:MGI Symbol;Acc:MGI:1349430]
ENSMUSG00000001289	1585.62	-0.217061	0.0548671	-3.95613	7.61726e-05	0.00321707	1370.51	1482.55	1507.09	1550.8	1486.26	1711.88	1600.37	1735.43	1825.68	Pfdn5	NA	prefoldin 5 [Source:MGI Symbol;Acc:MGI:1928753]
ENSMUSG00000034825	59.067	0.76299	0.193118	3.9509	7.78579e-05	0.00327713	79.0307	72.6573	68.021	65.8912	75.7737	43.3191	33.5259	50.1466	43.2374	Nrip3	78593	nuclear receptor interacting protein 3 [Source:MGI Symbol;Acc:MGI:1925843]
ENSMUSG00000020267	2486.33	-0.217707	0.0551284	-3.94909	7.84501e-05	0.00329094	2100.1	2375.2	2345.66	2366.2	2406.5	2689.65	2513.46	2714.19	2866.02	Hint1	15254	histidine triad nucleotide binding protein 1 [Source:MGI Symbol;Acc:MGI:1321133]
ENSMUSG00000040258	625.768	0.452242	0.114613	3.94581	7.95311e-05	0.00332509	891.505	646.996	729.1	642.439	644.533	601.052	522.61	470.124	483.553	Nxph4	104080	neurexophilin 4 [Source:MGI Symbol;Acc:MGI:1336197]
ENSMUSG00000087370	1189.99	0.206418	0.0524258	3.93733	8.23924e-05	0.0034332	1253.89	1303.51	1290.27	1268.41	1206.9	1062.09	1162.56	1115.76	1046.52	Tmem170b	621976	transmembrane protein 170B [Source:MGI Symbol;Acc:MGI:3647046]
ENSMUSG00000026014	774.974	0.27754	0.0705053	3.93644	8.26982e-05	0.00343446	843.315	911.676	798.184	802.461	843.553	707.802	761.236	644.742	661.798	Raph1	77300	Ras association (RalGDS/AF-6) and pleckstrin homology domains 1 [Source:MGI Symbol;Acc:MGI:1924550]
ENSMUSG00000025982	8998.97	0.153811	0.039118	3.93199	8.42468e-05	0.00346811	8959.38	9713.58	9836.48	9361.26	9240.74	8397.71	8612.22	8737.15	8132.17	Sf3b1	81898	splicing factor 3b, subunit 1 [Source:MGI Symbol;Acc:MGI:1932339]
ENSMUSG00000053930	147.334	0.868042	0.220694	3.93324	8.38102e-05	0.00346811	169.627	295.819	128.602	157.668	169.806	113.713	90.7172	103.875	96.1812	Shisa6	380702	shisa family member 6 [Source:MGI Symbol;Acc:MGI:2685725]
ENSMUSG00000072769	63.6066	0.763684	0.194237	3.93171	8.43437e-05	0.00346811	77.1031	71.7923	75.4608	92.9537	72.1219	38.6777	39.4423	53.7285	51.179	Gm10419	NA	predicted gene 10419 [Source:MGI Symbol;Acc:MGI:3642823]
ENSMUSG00000014313	1729.09	-0.25345	0.0645107	-3.92881	8.53664e-05	0.00348715	1480.38	1750.69	1599.56	1556.68	1576.64	1817.85	1801.53	2098.1	1880.39	Cox6c	12864	cytochrome c oxidase subunit 6C [Source:MGI Symbol;Acc:MGI:104614]
ENSMUSG00000026657	5692.62	0.145584	0.0370527	3.92909	8.52678e-05	0.00348715	5607.33	6011.52	6101.7	6010.22	5999.81	5277.96	5492.33	5503.59	5229.08	Frmd4a	209630	FERM domain containing 4A [Source:MGI Symbol;Acc:MGI:1919850]
ENSMUSG00000028495	2363.31	-0.263962	0.0672656	-3.92417	8.70295e-05	0.00352045	2144.43	1949.64	2050.2	2237.95	2467.67	2673.4	2458.24	2603.15	2685.13	Rps6	20104	ribosomal protein S6 [Source:MGI Symbol;Acc:MGI:98159]
ENSMUSG00000033545	1929.9	0.21012	0.0535369	3.92477	8.68132e-05	0.00352045	1933.36	2213.45	2001.31	2139.11	1981.07	1833.32	1823.22	1710.36	1733.91	Znrf1	170737	zinc and ring finger 1 [Source:MGI Symbol;Acc:MGI:2177308]
ENSMUSG00000045409	902.464	0.253057	0.0644863	3.9242	8.70169e-05	0.00352045	994.63	943.679	974.614	1003.66	944.889	881.852	857.869	766.527	754.449	Trim39	79263	tripartite motif-containing 39 [Source:MGI Symbol;Acc:MGI:1890659]
ENSMUSG00000079139	1040.23	-0.248704	0.0634003	-3.92276	8.75418e-05	0.00352972	912.708	968.763	977.802	1007.19	933.02	1091.49	1234.54	1185.61	1050.93	Gm4204	NA	predicted gene 4204 [Source:MGI Symbol;Acc:MGI:3782381]
ENSMUSG00000024743	1453.53	0.276568	0.0705405	3.9207	8.82906e-05	0.00354843	1410.02	1786.16	1500.71	1651.99	1529.17	1309.63	1298.64	1352.17	1243.3	Syt7	54525	synaptotagmin VII [Source:MGI Symbol;Acc:MGI:1859545]
ENSMUSG00000029547	1936.64	0.166157	0.0424312	3.9159	9.0067e-05	0.00360818	2130.94	1972.99	2015.12	2016.74	2040.41	1873.55	1830.12	1755.13	1794.79	Ints1	68510	integrator complex subunit 1 [Source:MGI Symbol;Acc:MGI:1915760]
ENSMUSG00000069601	5598.2	0.195668	0.0499958	3.91368	9.09008e-05	0.00362991	5726.84	6555.59	5784.98	5819.61	5771.58	4981.69	5446.98	5184.8	5111.72	Ank3	11735	ankyrin 3, epithelial [Source:MGI Symbol;Acc:MGI:88026]
ENSMUSG00000019254	1338.25	0.198775	0.0508349	3.9102	9.22189e-05	0.00367078	1439.9	1391.73	1416.75	1462.55	1390.4	1315.82	1173.41	1192.77	1260.94	Ppp1r12c	232807	protein phosphatase 1, regulatory subunit 12C [Source:MGI Symbol;Acc:MGI:1924258]
ENSMUSG00000034566	1679.16	-0.18441	0.0472243	-3.90497	9.42354e-05	0.0037391	1493.87	1629.6	1651.64	1601.39	1541.04	1793.1	1744.33	1868.86	1788.62	Atp5h	71679	ATP synthase, H+ transporting, mitochondrial F0 complex, subunit D [Source:MGI Symbol;Acc:MGI:1918929]
ENSMUSG00000023186	194.565	-0.515993	0.132222	-3.90247	9.5217e-05	0.00376606	162.88	141.855	160.487	172.964	178.022	194.162	282.012	231.928	226.776	Vwa5a	67776	von Willebrand factor A domain containing 5A [Source:MGI Symbol;Acc:MGI:1915026]
ENSMUSG00000021917	941.498	-0.222945	0.0571415	-3.90164	9.55451e-05	0.00376708	818.257	870.157	872.582	936.597	885.548	975.452	1012.68	1050.39	1051.82	Spcs1	69019	signal peptidase complex subunit 1 homolog (S. cerevisiae) [Source:MGI Symbol;Acc:MGI:1916269]
ENSMUSG00000038056	2967.18	0.211801	0.0543098	3.89987	9.62427e-05	0.00378261	3300.98	3089.66	3192.74	2952.16	3254.62	2470.73	2814.21	2825.22	2804.26	Kmt2c	231051	lysine (K)-specific methyltransferase 2C [Source:MGI Symbol;Acc:MGI:2444959]
ENSMUSG00000007872	963.086	-0.341161	0.0877336	-3.8886	0.000100825	0.00395026	947.405	768.956	755.671	874.235	957.67	988.603	1127.06	1075.47	1172.71	Id3	15903	inhibitor of DNA binding 3 [Source:MGI Symbol;Acc:MGI:96398]
ENSMUSG00000020000	774.212	-0.350418	0.0902091	-3.88451	0.000102538	0.00399683	724.769	661.7	696.153	604.787	762.301	990.15	759.264	877.566	891.221	Moxd1	59012	monooxygenase, DBH-like 1 [Source:MGI Symbol;Acc:MGI:1921582]
ENSMUSG00000061983	2600.66	-0.245143	0.0631124	-3.88423	0.000102656	0.00399683	2071.18	2462.56	2473.2	2410.91	2596.39	2814.97	2734.33	2960.44	2881.91	Rps12	NA	ribosomal protein S12 [Source:MGI Symbol;Acc:MGI:98105]
ENSMUSG00000020186	2134.41	-0.18329	0.0472028	-3.88302	0.000103167	0.00400422	2041.31	1972.13	2132.03	2056.75	1867.87	2307.51	2212.71	2299.58	2319.82	Csrp2	NA	cysteine and glycine-rich protein 2 [Source:MGI Symbol;Acc:MGI:1202907]
ENSMUSG00000020827	880.115	0.255946	0.0659457	3.88117	0.000103956	0.00400492	997.522	973.953	844.949	980.132	945.802	807.591	837.162	746.826	787.098	Mink1	50932	misshapen-like kinase 1 (zebrafish) [Source:MGI Symbol;Acc:MGI:1355329]
ENSMUSG00000037072	3443.14	-0.270421	0.0696607	-3.88197	0.000103616	0.00400492	3046.54	3051.6	3142.78	3052.18	3477.37	3640.35	3350.62	4061.88	4164.91	Selenof	93684	selenoprotein F [Source:MGI Symbol;Acc:MGI:1927947]
ENSMUSG00000053580	1275.31	0.364302	0.0938915	3.88003	0.000104443	0.00400492	1306.9	1781.83	1312.59	1348.42	1326.5	1053.58	1176.37	1091.58	1080.05	Tanc2	77097	tetratricopeptide repeat, ankyrin repeat and coiled-coil containing 2 [Source:MGI Symbol;Acc:MGI:2444121]
ENSMUSG00000078716	787.802	0.238167	0.0613838	3.87997	0.000104471	0.00400492	775.85	877.942	833.257	893.061	846.292	734.877	686.295	719.962	722.683	Tmem8b	242409	transmembrane protein 8B [Source:MGI Symbol;Acc:MGI:2441680]
ENSMUSG00000045237	204.799	-0.412211	0.106346	-3.87612	0.000106134	0.00404381	198.541	182.508	175.367	150.608	184.413	236.708	229.751	239.987	245.306	1110012L19Rik	68618	RIKEN cDNA 1110012L19 gene [Source:MGI Symbol;Acc:MGI:1915868]
ENSMUSG00000062691	205.34	-0.423586	0.109264	-3.8767	0.000105881	0.00404381	164.808	187.698	176.43	158.845	202.672	239.802	221.863	244.465	251.483	Cebpzos	68554	CCAAT/enhancer binding protein (C/EBP), zeta, opposite strand [Source:MGI Symbol;Acc:MGI:1915804]
ENSMUSG00000024843	1459.98	0.203675	0.0525952	3.87251	0.000107722	0.00407935	1543.99	1585.49	1558.11	1527.26	1539.21	1443.45	1392.31	1257.25	1292.71	Chka	12660	choline kinase alpha [Source:MGI Symbol;Acc:MGI:107760]
ENSMUSG00000027951	1156.56	0.208806	0.0539147	3.8729	0.000107548	0.00407935	1244.25	1277.56	1170.17	1224.87	1234.29	1134.03	1077.76	1013.68	1032.4	Adar	56417	adenosine deaminase, RNA-specific [Source:MGI Symbol;Acc:MGI:1889575]
ENSMUSG00000029456	179.908	-0.460813	0.119145	-3.86768	0.000109878	0.00414838	148.424	141.855	144.545	165.905	170.719	216.595	187.351	237.301	206.481	Acad10	71985	acyl-Coenzyme A dehydrogenase family, member 10 [Source:MGI Symbol;Acc:MGI:1919235]
ENSMUSG00000010663	3184.6	0.171044	0.0442959	3.86138	0.000112747	0.00420571	3319.29	3425.27	3323.46	3366.34	3322.17	3165.39	3059.73	2886.12	2793.67	Fads1	76267	fatty acid desaturase 1 [Source:MGI Symbol;Acc:MGI:1923517]
ENSMUSG00000016933	3091.12	0.158703	0.0410845	3.86284	0.000112076	0.00420571	3263.39	3316.28	3345.78	3134.54	3143.24	2896.19	3051.84	2796.57	2872.2	Plcg1	18803	phospholipase C, gamma 1 [Source:MGI Symbol;Acc:MGI:97615]
ENSMUSG00000026490	2293.78	0.158871	0.0411334	3.86233	0.000112311	0.00420571	2357.43	2517.05	2410.49	2366.2	2370.89	2066.94	2223.56	2157.2	2174.23	Cdc42bpa	226751	CDC42 binding protein kinase alpha [Source:MGI Symbol;Acc:MGI:2441841]
ENSMUSG00000030519	3477.4	0.148638	0.0384906	3.86168	0.000112608	0.00420571	3631.56	3804.99	3631.68	3562.83	3547.67	3410.6	3177.07	3230.87	3299.28	Apba2	11784	amyloid beta (A4) precursor protein-binding, family A, member 2 [Source:MGI Symbol;Acc:MGI:1261791]
ENSMUSG00000035351	483.542	-0.318951	0.0826158	-3.86065	0.000113084	0.00420571	437.56	409.13	503.781	402.407	426.341	571.657	530.498	554.299	516.202	Nup37	69736	nucleoporin 37 [Source:MGI Symbol;Acc:MGI:1919964]
ENSMUSG00000105879	87.1235	-0.753873	0.195345	-3.85918	0.00011377	0.00421862	53.0084	70.0624	62.7069	70.5977	77.5996	110.618	79.8706	136.112	123.536	Gm6204	NA	predicted gene 6204 [Source:MGI Symbol;Acc:MGI:3649038]
ENSMUSG00000041841	2492.88	-0.263854	0.0684134	-3.85676	0.000114901	0.00424792	2064.44	2334.55	2337.16	2315.61	2392.8	2671.86	2424.71	2987.31	2907.5	Rpl37	67281	ribosomal protein L37 [Source:MGI Symbol;Acc:MGI:1914531]
ENSMUSG00000015357	799.812	-0.233205	0.0605267	-3.85293	0.000116713	0.00428945	726.697	762.901	806.687	702.447	710.264	846.269	868.716	894.58	879.75	Clpx	270166	caseinolytic mitochondrial matrix peptidase chaperone subunit [Source:MGI Symbol;Acc:MGI:1346017]
ENSMUSG00000056209	500.535	-0.42274	0.1097	-3.8536	0.000116395	0.00428945	409.61	377.126	466.582	410.643	509.418	505.905	552.192	607.132	666.21	Npm3	18150	nucleoplasmin 3 [Source:MGI Symbol;Acc:MGI:894653]
ENSMUSG00000033392	3897.49	0.159024	0.0412897	3.85143	0.000117432	0.00429993	4265.73	4167.41	3901.64	4019.36	4079.91	3682.89	3555.72	3842.48	3562.24	Clasp2	76499	CLIP associating protein 2 [Source:MGI Symbol;Acc:MGI:1923749]
ENSMUSG00000046330	3313.79	-0.235724	0.0612128	-3.85089	0.000117688	0.00429993	2704.39	3232.38	3260.76	3054.53	3105.81	3577.69	3397.95	3862.18	3628.42	Rpl37a	19981	ribosomal protein L37a [Source:MGI Symbol;Acc:MGI:98068]
ENSMUSG00000014786	604.155	0.344571	0.0895301	3.84866	0.000118765	0.0043266	628.391	597.692	684.462	756.572	670.095	519.829	557.122	459.379	563.852	Slc9a5	277973	solute carrier family 9 (sodium/hydrogen exchanger), member 5 [Source:MGI Symbol;Acc:MGI:2685542]
ENSMUSG00000028609	1277.01	-0.289627	0.0753328	-3.84463	0.000120732	0.00438543	1001.38	1153	1284.96	1207.22	1165.82	1347.53	1332.16	1507.98	1493.02	Magoh	17149	mago homolog, exon junction complex core component [Source:MGI Symbol;Acc:MGI:1330312]
ENSMUSG00000062070	3564.36	0.343489	0.0893659	3.84363	0.000121228	0.00438709	4003.58	4032.48	4799.73	3535.77	3303	3014.54	3040.01	3166.4	3183.69	Pgk1	18655	phosphoglycerate kinase 1 [Source:MGI Symbol;Acc:MGI:97555]
ENSMUSG00000074305	619.353	0.333443	0.0867637	3.84312	0.000121482	0.00438709	694.892	674.674	765.236	608.317	664.617	517.508	609.383	549.822	489.73	Peak1	244895	pseudopodium-enriched atypical kinase 1 [Source:MGI Symbol;Acc:MGI:2442366]
ENSMUSG00000001127	1806.4	0.171755	0.0447797	3.83555	0.000125282	0.00451125	1867.82	1860.54	1892.9	2014.39	1875.17	1717.29	1605.3	1722	1702.14	Araf	11836	Araf proto-oncogene, serine/threonine kinase [Source:MGI Symbol;Acc:MGI:88065]
ENSMUSG00000019432	7455.75	0.178728	0.0466247	3.83333	0.000126419	0.00453476	7588.88	7619.5	7966.96	8117.56	8025.62	7409.88	6973.39	6396.38	7003.58	Ddx39b	53817	DEAD (Asp-Glu-Ala-Asp) box polypeptide 39B [Source:MGI Symbol;Acc:MGI:99240]
ENSMUSG00000028249	1835.41	-0.156466	0.0408224	-3.83286	0.000126663	0.00453476	1757.95	1698.8	1745.16	1710.82	1817.66	1919.19	1986.9	1970.05	1912.15	Sdcbp	53378	syndecan binding protein [Source:MGI Symbol;Acc:MGI:1337026]
ENSMUSG00000054091	624.64	-0.307628	0.0803093	-3.83053	0.000127865	0.00456467	558.034	519.845	609.001	580.078	560.543	725.594	623.188	672.502	772.98	1810037I17Rik	NA	RIKEN cDNA 1810037I17 gene [Source:MGI Symbol;Acc:MGI:1914954]
ENSMUSG00000004113	1111.04	0.297776	0.0777633	3.82926	0.000128527	0.00457519	1173.9	1418.55	1137.23	1234.28	1091.87	970.811	1027.47	998.455	946.812	Cacna1b	12287	calcium channel, voltage-dependent, N type, alpha 1B subunit [Source:MGI Symbol;Acc:MGI:88296]
ENSMUSG00000017404	2792.15	-0.230268	0.0602034	-3.82483	0.000130864	0.0046451	2344.9	2604.42	2637.94	2561.52	2814.58	2942.6	2836.88	3183.41	3203.1	Rpl19	19921	ribosomal protein L19 [Source:MGI Symbol;Acc:MGI:98020]
ENSMUSG00000052146	3166.85	-0.315439	0.0824876	-3.82408	0.000131259	0.00464589	2707.28	2799.9	2711.28	2832.15	3232.71	3583.1	2975.92	3635.63	4023.73	Rps10	67097	ribosomal protein S10 [Source:MGI Symbol;Acc:MGI:1914347]
ENSMUSG00000038685	1071.47	0.227984	0.0596516	3.82193	0.000132413	0.00467348	1150.76	1038.83	1189.31	1164.86	1187.73	983.961	970.28	929.503	1027.99	Rtel1	269400	regulator of telomere elongation helicase 1 [Source:MGI Symbol;Acc:MGI:2139369]
ENSMUSG00000031701	2930.1	-0.138389	0.0362284	-3.81991	0.000133498	0.00469845	2771.86	2908.89	2844.13	2720.37	2775.33	3088.8	3067.62	3165.5	3028.39	Dnaja2	56445	DnaJ heat shock protein family (Hsp40) member A2 [Source:MGI Symbol;Acc:MGI:1931882]
ENSMUSG00000017776	3703.6	-0.178096	0.0466627	-3.81668	0.00013526	0.00473372	3763.6	3498.79	3557.29	3421.64	3254.62	3901.81	3965.92	4098.59	3870.19	Crk	12928	v-crk avian sarcoma virus CT10 oncogene homolog [Source:MGI Symbol;Acc:MGI:88508]
ENSMUSG00000075590	1214.38	0.342405	0.0897039	3.81706	0.00013505	0.00473372	1180.64	1360.59	1240.32	1555.5	1365.75	1165.75	1103.4	926.817	1030.64	Nrbp2	223649	nuclear receptor binding protein 2 [Source:MGI Symbol;Acc:MGI:2385017]
ENSMUSG00000025362	3215.46	-0.206535	0.0541705	-3.81269	0.000137461	0.00477884	2748.73	2978.95	3153.41	3135.72	3034.6	3488.73	3205.67	3566.68	3626.65	Rps26	NA	ribosomal protein S26 [Source:MGI Symbol;Acc:MGI:1351628]
ENSMUSG00000034220	1910.86	0.16508	0.0432943	3.81298	0.000137303	0.00477884	1930.47	2048.24	2022.56	2096.75	1939.99	1776.08	1816.32	1740.8	1826.56	Gpc1	14733	glypican 1 [Source:MGI Symbol;Acc:MGI:1194891]
ENSMUSG00000056258	219.105	0.609532	0.159945	3.81089	0.000138467	0.00477884	285.282	326.958	190.246	229.443	260.187	140.013	174.532	179.095	186.186	Kcnq3	110862	potassium voltage-gated channel, subfamily Q, member 3 [Source:MGI Symbol;Acc:MGI:1336181]
ENSMUSG00000058799	8854.61	-0.149343	0.0391779	-3.8119	0.000137901	0.00477884	8312.68	8053.71	8640.8	8904.73	8317.76	9177.45	9713.64	9473.23	9097.51	Nap1l1	53605	nucleosome assembly protein 1-like 1 [Source:MGI Symbol;Acc:MGI:1855693]
ENSMUSG00000106099	507.59	0.523596	0.137371	3.81154	0.000138103	0.00477884	514.663	629.696	570.739	518.893	699.309	303.233	396.395	486.243	449.14	Gm42664	NA	predicted gene 42664 [Source:MGI Symbol;Acc:MGI:5662801]
ENSMUSG00000035835	3226.32	0.181336	0.0476709	3.80391	0.000142429	0.00490201	3362.66	3624.21	3272.45	3436.93	3330.39	3153.78	2871.4	2881.64	3103.39	Plppr3	216152	phospholipid phosphatase related 3 [Source:MGI Symbol;Acc:MGI:2388640]
ENSMUSG00000003154	454.737	0.286358	0.0752979	3.803	0.000142957	0.0049066	521.41	523.305	493.152	470.652	462.858	412.305	380.618	406.546	421.786	Foxj2	60611	forkhead box J2 [Source:MGI Symbol;Acc:MGI:1926805]
ENSMUSG00000020390	1640.33	-0.174498	0.0458983	-3.80183	0.000143632	0.00491625	1653.86	1500.72	1513.47	1541.38	1550.17	1786.91	1691.09	1764.98	1760.38	Ube2b	22210	ubiquitin-conjugating enzyme E2B [Source:MGI Symbol;Acc:MGI:102944]
ENSMUSG00000102602	359.294	0.382566	0.100666	3.80036	0.000144485	0.00493187	332.507	388.37	441.074	421.233	420.863	279.253	308.636	316.103	325.604	A930004J17Rik	NA	RIKEN cDNA A930004J17 gene [Source:MGI Symbol;Acc:MGI:2442442]
ENSMUSG00000071415	4286.79	-0.262201	0.0690515	-3.79719	0.000146348	0.00498182	3346.28	3984.04	4258.75	4207.62	3894.58	4414.68	4647.28	4934.96	4892.89	Rpl23	65019	ribosomal protein L23 [Source:MGI Symbol;Acc:MGI:1929455]
ENSMUSG00000006007	1661.96	-0.49968	0.131658	-3.7953	0.000147465	0.00499258	1690.49	1269.77	1306.22	1261.35	1490.82	1906.04	1425.84	2244.96	2362.18	Pdc	20028	phosducin [Source:MGI Symbol;Acc:MGI:98090]
ENSMUSG00000043411	2662.68	0.213515	0.0562506	3.79579	0.000147176	0.00499258	3027.26	2831.04	2869.64	2759.19	2694.07	2640.92	2533.18	2297.79	2311	Usp48	170707	ubiquitin specific peptidase 48 [Source:MGI Symbol;Acc:MGI:2158502]
ENSMUSG00000008200	2682.73	0.205394	0.0541407	3.7937	0.000148417	0.00501119	2528.98	2857.85	3037.56	2950.99	2881.23	2522.56	2454.29	2455.39	2455.71	Fnbp4	55935	formin binding protein 4 [Source:MGI Symbol;Acc:MGI:1860513]
ENSMUSG00000059040	162.903	4.9767	1.31278	3.79096	0.000150068	0.00505323	6.74652	14.7044	18.0681	700.094	690.18	5.41488	7.88845	6.26833	16.7655	Eno1b	433182	enolase 1B, retrotransposed [Source:MGI Symbol;Acc:MGI:3648653]
ENSMUSG00000063524	10052.9	0.26856	0.0709433	3.78556	0.000153361	0.0051502	10827.2	10994.6	12782.6	9948.4	9815.89	9254.03	9362.61	8662.83	8827.5	Eno1	13806	enolase 1, alpha non-neuron [Source:MGI Symbol;Acc:MGI:95393]
ENSMUSG00000004677	1624.63	0.183001	0.0483892	3.78187	0.000155657	0.00521324	1724.22	1705.72	1733.47	1667.28	1744.62	1496.05	1582.62	1403.21	1564.49	Myo9b	17925	myosin IXb [Source:MGI Symbol;Acc:MGI:106624]
ENSMUSG00000025159	1056.78	0.249619	0.0660267	3.78057	0.00015647	0.00522642	1074.62	1064.77	1255.2	1163.69	1129.3	1003.3	991.973	894.58	933.576	Mms19	72199	MMS19 cytosolic iron-sulfur assembly component [Source:MGI Symbol;Acc:MGI:1919449]
ENSMUSG00000029862	132.395	0.524753	0.138906	3.77776	0.000158246	0.00527161	130.112	155.694	147.733	177.671	155.199	102.109	94.6614	109.248	119.124	Clcn1	12723	chloride channel, voltage-sensitive 1 [Source:MGI Symbol;Acc:MGI:88417]
ENSMUSG00000095139	620.48	0.311459	0.0825433	3.77328	0.000161114	0.00535286	701.638	720.518	684.462	662.442	627.187	621.164	559.094	491.616	516.202	Pou3f2	NA	POU domain, class 3, transcription factor 2 [Source:MGI Symbol;Acc:MGI:101895]
ENSMUSG00000004268	1299.95	-0.190013	0.0504109	-3.76928	0.00016372	0.00542496	1244.25	1221.33	1279.65	1190.75	1182.25	1398.59	1329.2	1380.82	1472.72	Emg1	14791	EMG1 N1-specific pseudouridine methyltransferase [Source:MGI Symbol;Acc:MGI:1315195]
ENSMUSG00000026289	832.602	0.204258	0.0542012	3.76851	0.000164223	0.0054272	857.772	895.241	921.472	891.885	857.247	778.196	764.194	784.436	742.978	Atg16l1	77040	autophagy related 16-like 1 (S. cerevisiae) [Source:MGI Symbol;Acc:MGI:1924290]
ENSMUSG00000024459	98.1254	0.589217	0.156498	3.76502	0.000166535	0.00546158	108.908	117.636	100.969	136.489	113.204	86.6381	77.8985	74.3244	67.0622	H2-M5	240095	histocompatibility 2, M region locus 5 [Source:MGI Symbol;Acc:MGI:95917]
ENSMUSG00000030432	3175.03	-0.167414	0.0444572	-3.76575	0.000166053	0.00546158	2768.97	3061.98	3047.13	3159.25	3018.17	3472.49	3304.28	3366.99	3376.05	Rpl28	19943	ribosomal protein L28 [Source:MGI Symbol;Acc:MGI:101839]
ENSMUSG00000059742	278.302	0.416746	0.110691	3.76496	0.000166578	0.00546158	316.123	363.286	302.906	302.394	281.184	244.443	222.849	264.165	207.363	Kcnh7	170738	potassium voltage-gated channel, subfamily H (eag-related), member 7 [Source:MGI Symbol;Acc:MGI:2159566]
ENSMUSG00000022329	443.848	-0.274341	0.0731081	-3.75254	0.000175051	0.00569441	371.059	413.454	412.377	417.703	416.299	486.566	466.405	512.212	498.554	Stk3	56274	serine/threonine kinase 3 [Source:MGI Symbol;Acc:MGI:1928487]
ENSMUSG00000036565	4915.15	0.218059	0.0581032	3.75296	0.000174759	0.00569441	5209.28	5786.63	4818.86	5240.7	5151.7	4602.65	4817.87	4225.75	4382.86	Ttyh3	78339	tweety family member 3 [Source:MGI Symbol;Acc:MGI:1925589]
ENSMUSG00000072501	1820.62	0.159479	0.0424957	3.75283	0.000174849	0.00569441	1977.7	1905.52	1912.03	1876.72	1875.17	1764.48	1749.26	1680.81	1643.91	Phf20l1	239510	PHD finger protein 20-like 1 [Source:MGI Symbol;Acc:MGI:2444412]
ENSMUSG00000008153	685.779	0.340359	0.090792	3.74878	0.000177699	0.00576549	746.937	918.595	690.838	720.097	704.787	633.541	576.843	585.641	594.735	Clstn3	232370	calsyntenin 3 [Source:MGI Symbol;Acc:MGI:2178323]
ENSMUSG00000034687	375.494	0.331348	0.0884313	3.74695	0.000178995	0.00579246	414.429	427.294	455.953	357.695	408.995	324.893	350.05	329.535	310.604	Fras1	231470	Fraser extracellular matrix complex subunit 1 [Source:MGI Symbol;Acc:MGI:2385368]
ENSMUSG00000020716	2337.49	0.221192	0.0590428	3.7463	0.000179464	0.0057926	2721.74	2375.2	2530.59	2321.49	2523.35	2025.94	2314.27	2106.16	2118.63	Nf1	18015	neurofibromin 1 [Source:MGI Symbol;Acc:MGI:97306]
ENSMUSG00000024059	531.264	0.299841	0.0800541	3.74548	0.00018005	0.0057965	587.911	602.017	609.001	593.021	507.592	472.642	426.962	491.616	490.613	Clip4	78785	CAP-GLY domain containing linker protein family, member 4 [Source:MGI Symbol;Acc:MGI:1919100]
ENSMUSG00000007783	470.083	0.305126	0.081508	3.74351	0.00018147	0.00582714	455.872	516.385	482.524	565.958	547.762	409.984	414.144	411.919	426.198	Cpt1c	78070	carnitine palmitoyltransferase 1c [Source:MGI Symbol;Acc:MGI:2446526]
ENSMUSG00000021112	797.918	-0.27687	0.0740303	-3.73996	0.000184052	0.00589488	767.176	668.62	736.54	736.57	738.565	934.454	952.531	863.238	783.568	Mpp5	56217	membrane protein, palmitoylated 5 (MAGUK p55 subfamily member 5) [Source:MGI Symbol;Acc:MGI:1927339]
ENSMUSG00000056763	1581.23	0.2314	0.0619201	3.73707	0.000186176	0.0059476	1497.73	1699.66	1780.24	1826.13	1662.46	1492.19	1461.34	1392.46	1418.89	Cspp1	211660	centrosome and spindle pole associated protein 1 [Source:MGI Symbol;Acc:MGI:2681832]
ENSMUSG00000057286	60.9627	-0.788801	0.211261	-3.73377	0.000188637	0.0060108	53.9722	38.0586	37.199	42.3586	58.4279	71.9406	68.0379	89.5475	89.1221	St6galnac2	NA	ST6 (alpha-N-acetyl-neuraminyl-2,3-beta-galactosyl-1,3)-N-acetylgalactosaminide alpha-2,6-sialyltransferase 2 [Source:MGI Symbol;Acc:MGI:107553]
ENSMUSG00000005649	138.98	-0.936367	0.251006	-3.73046	0.000191132	0.00607478	92.5238	65.7375	78.6493	128.253	129.637	154.711	122.271	234.615	244.424	Cabp5	29865	calcium binding protein 5 [Source:MGI Symbol;Acc:MGI:1352746]
ENSMUSG00000019082	616.248	0.337777	0.0905815	3.72898	0.000192254	0.00609491	718.987	788.85	610.064	628.32	648.184	537.62	556.136	488.929	569.146	Slc25a22	68267	solute carrier family 25 (mitochondrial carrier, glutamate), member 22 [Source:MGI Symbol;Acc:MGI:1915517]
ENSMUSG00000044155	869.534	-0.191987	0.0515147	-3.72683	0.0001939	0.00612989	807.655	829.504	842.823	778.928	828.946	942.189	930.837	934.876	930.046	Lsm8	76522	LSM8 homolog, U6 small nuclear RNA associated [Source:MGI Symbol;Acc:MGI:1923772]
ENSMUSG00000086429	314.052	-0.362187	0.0971985	-3.72626	0.000194342	0.00612989	239.983	286.304	295.466	283.568	289.401	384.457	319.482	351.026	376.783	Gt(ROSA)26Sor	14910	gene trap ROSA 26, Philippe Soriano [Source:MGI Symbol;Acc:MGI:104735]
ENSMUSG00000056073	520.958	0.36548	0.0981163	3.72497	0.000195337	0.0061457	545.505	707.543	561.173	540.073	536.806	468.774	476.265	428.933	423.55	Grik2	14806	glutamate receptor, ionotropic, kainate 2 (beta 2) [Source:MGI Symbol;Acc:MGI:95815]
ENSMUSG00000023033	853.389	0.256038	0.0687622	3.72353	0.000196457	0.0061654	882.831	1050.94	868.331	891.885	903.807	790.573	763.208	767.422	761.508	Scn8a	20273	sodium channel, voltage-gated, type VIII, alpha [Source:MGI Symbol;Acc:MGI:103169]
ENSMUSG00000029632	1837.37	-0.287033	0.077114	-3.72219	0.0001975	0.00618254	1407.13	1746.37	1851.45	1676.7	1687.11	1957.09	1901.12	2155.41	2153.93	Ndufa4	NA	Ndufa4, mitochondrial complex associated [Source:MGI Symbol;Acc:MGI:107686]
ENSMUSG00000002068	393.835	0.342457	0.0920852	3.71891	0.000200081	0.00624765	376.842	426.429	432.571	470.652	467.423	361.25	365.827	319.685	323.84	Ccne1	12447	cyclin E1 [Source:MGI Symbol;Acc:MGI:88316]
ENSMUSG00000040649	2673.38	0.163623	0.0440126	3.71765	0.000201082	0.00626322	2666.8	2952.13	2842	2854.5	2718.72	2460.68	2616.01	2490.32	2459.24	Rimklb	108653	ribosomal modification protein rimK-like family member B [Source:MGI Symbol;Acc:MGI:1918325]
ENSMUSG00000009418	2305.75	0.355755	0.0957282	3.71631	0.000202157	0.00628098	2316.95	3239.3	2237.25	2592.11	2381.85	2015.88	2092.41	1966.46	1909.51	Nav1	215690	neuron navigator 1 [Source:MGI Symbol;Acc:MGI:2183683]
ENSMUSG00000016346	1667.51	0.354937	0.0955548	3.71448	0.000203618	0.00629499	1799.39	2349.25	1652.7	1742.59	1687.11	1453.51	1382.45	1422.01	1518.6	Kcnq2	16536	potassium voltage-gated channel, subfamily Q, member 2 [Source:MGI Symbol;Acc:MGI:1309503]
ENSMUSG00000020328	930.489	-0.224043	0.0603134	-3.71464	0.000203492	0.00629499	906.926	850.263	909.781	881.295	783.299	1038.88	1001.83	1024.42	977.696	Nudcd2	52653	NudC domain containing 2 [Source:MGI Symbol;Acc:MGI:1277103]
ENSMUSG00000043467	1259.22	0.187302	0.0504691	3.71123	0.000206258	0.00636082	1327.14	1313.89	1388.05	1290.76	1333.8	1111.6	1242.43	1160.54	1164.76	Zbtb37	240869	zinc finger and BTB domain containing 37 [Source:MGI Symbol;Acc:MGI:2444467]
ENSMUSG00000036686	614.08	0.237983	0.0641562	3.70943	0.000207726	0.00637452	667.906	646.131	657.891	685.975	637.229	575.525	537.401	529.226	589.441	Cc2d1a	212139	coiled-coil and C2 domain containing 1A [Source:MGI Symbol;Acc:MGI:2384831]
ENSMUSG00000047613	410.43	-0.292784	0.0789237	-3.70971	0.000207496	0.00637452	389.371	358.096	379.43	361.225	377.955	450.209	413.158	480.87	483.553	A430005L14Rik	97159	RIKEN cDNA A430005L14 gene [Source:MGI Symbol;Acc:MGI:2140680]
ENSMUSG00000029439	2650.9	0.141555	0.0381698	3.70857	0.000208431	0.00638044	2750.65	2729.84	2783.55	2841.56	2727.85	2626.99	2493.74	2445.54	2458.36	Sfswap	231769	splicing factor SWAP [Source:MGI Symbol;Acc:MGI:101760]
ENSMUSG00000009739	1027.89	0.298105	0.0806403	3.69672	0.000218399	0.0066529	1078.48	1325.13	1076.65	1111.91	1011.53	898.87	858.855	929.503	960.048	Pou6f1	19009	POU domain, class 6, transcription factor 1 [Source:MGI Symbol;Acc:MGI:102935]
ENSMUSG00000014980	368.114	-0.310029	0.0838524	-3.69732	0.000217886	0.0066529	313.231	334.742	312.472	378.874	325.005	400.701	425.976	397.591	424.433	Tsen15	66637	tRNA splicing endonuclease subunit 15 [Source:MGI Symbol;Acc:MGI:1913887]
ENSMUSG00000036816	197.448	-0.441074	0.119478	-3.69167	0.000222786	0.00673346	199.504	166.939	157.299	149.432	177.11	219.689	258.347	212.228	236.482	Atoh7	53404	atonal bHLH transcription factor 7 [Source:MGI Symbol;Acc:MGI:1355553]
ENSMUSG00000037652	1129.05	0.209801	0.0568254	3.69203	0.000222475	0.00673346	1203.77	1236.04	1179.74	1117.8	1265.33	1024.96	1100.44	1049.5	983.872	Phc3	241915	polyhomeotic 3 [Source:MGI Symbol;Acc:MGI:2181434]
ENSMUSG00000038619	2814.94	-0.155531	0.042121	-3.69248	0.000222078	0.00673346	2760.29	2591.44	2766.54	2613.29	2664.86	2858.28	2935.49	3029.39	3114.86	Ensa	56205	endosulfine alpha [Source:MGI Symbol;Acc:MGI:1891189]
ENSMUSG00000062006	3788.49	-0.417552	0.113121	-3.69119	0.000223206	0.00673346	2334.3	3402.78	3570.04	3306.33	3869.94	4190.35	4047.76	4614.38	4760.53	Rpl34	68436	ribosomal protein L34 [Source:MGI Symbol;Acc:MGI:1915686]
ENSMUSG00000027206	1917.85	-0.185349	0.0502886	-3.68571	0.000228065	0.00686344	1810.96	1809.51	1930.1	1768.47	1719.06	1939.3	2039.16	2155.41	2088.63	Cops2	12848	COP9 signalosome subunit 2 [Source:MGI Symbol;Acc:MGI:1330276]
ENSMUSG00000022995	4151.24	0.16945	0.0459934	3.68422	0.000229404	0.0068871	4570.29	4413.93	4319.33	4337.05	4190.38	4017.84	4062.55	3846.96	3602.83	Enah	13800	ENAH actin regulator [Source:MGI Symbol;Acc:MGI:108360]
ENSMUSG00000029179	472.861	0.306014	0.0831993	3.67809	0.000234988	0.0070377	477.076	470.542	533.54	534.189	569.672	444.02	424.99	396.696	405.02	Zcchc4	78796	zinc finger, CCHC domain containing 4 [Source:MGI Symbol;Acc:MGI:1926046]
ENSMUSG00000038406	2583.62	0.174107	0.0473441	3.67748	0.00023555	0.0070377	2758.36	2779.14	2646.44	2729.78	2692.25	2536.49	2469.09	2209.14	2431.89	Scaf1	233208	SR-related CTD-associated factor 1 [Source:MGI Symbol;Acc:MGI:2141980]
ENSMUSG00000041879	3619.07	0.164966	0.0448725	3.67634	0.000236606	0.00705232	4014.18	3828.35	3827.25	3602.84	3732.99	3457.79	3556.71	3242.52	3308.99	Ipo9	226432	importin 9 [Source:MGI Symbol;Acc:MGI:1918944]
ENSMUSG00000037808	1686.8	0.220352	0.0599481	3.67571	0.000237192	0.00705291	1645.19	1763.67	1864.2	1942.61	1789.35	1646.9	1452.46	1563.5	1513.31	Fam76b	72826	family with sequence similarity 76, member B [Source:MGI Symbol;Acc:MGI:1920076]
ENSMUSG00000042308	641.322	0.231928	0.0631112	3.67491	0.000237937	0.00705822	647.666	721.383	687.65	664.795	709.351	564.695	608.397	581.163	586.794	Setd1a	233904	SET domain containing 1A [Source:MGI Symbol;Acc:MGI:2446244]
ENSMUSG00000031209	819.279	-0.335102	0.0912127	-3.67386	0.000238918	0.00707049	665.978	698.029	746.106	774.222	785.125	768.913	940.698	1042.33	952.106	Heph	15203	hephaestin [Source:MGI Symbol;Acc:MGI:1332240]
ENSMUSG00000032330	1412.58	-0.352158	0.095937	-3.67072	0.000241864	0.00714073	1054.39	1433.25	1453.95	1158.98	1188.64	1489.87	1535.29	1685.28	1713.61	Cox7a2	12866	cytochrome c oxidase subunit 7A2 [Source:MGI Symbol;Acc:MGI:1316715]
ENSMUSG00000041936	7538.79	0.170914	0.0465774	3.66945	0.000243074	0.00715947	7905.96	7813.25	7330.33	8294.06	8319.58	7144.55	7303.72	6681.14	7056.53	Agrn	11603	agrin [Source:MGI Symbol;Acc:MGI:87961]
ENSMUSG00000007880	6157.11	0.180839	0.0492921	3.66871	0.000243777	0.00716324	6827.48	6301.29	6369.53	6405.57	6582.27	6013.61	6088.9	5326.29	5499.1	Arid1a	93760	AT rich interactive domain 1A (SWI-like) [Source:MGI Symbol;Acc:MGI:1935147]
ENSMUSG00000031169	409.954	0.336203	0.0916875	3.66683	0.000245575	0.00719912	431.778	517.25	410.252	443.589	454.642	379.042	369.771	321.476	361.783	Porcn	53627	porcupine O-acyltransferase [Source:MGI Symbol;Acc:MGI:1890212]
ENSMUSG00000030172	1420.81	0.212313	0.05798	3.66183	0.000250422	0.00732397	1454.36	1652.95	1521.97	1409.6	1520.95	1241.56	1360.76	1331.57	1293.59	Erc1	111173	ELKS/RAB6-interacting/CAST family member 1 [Source:MGI Symbol;Acc:MGI:2151013]
ENSMUSG00000042548	2180.26	0.170406	0.0465856	3.65791	0.000254283	0.00740804	2132.87	2274	2274.45	2428.56	2361.77	2086.28	2051.98	2006.76	2005.69	Asxl1	228790	additional sex combs like 1 [Source:MGI Symbol;Acc:MGI:2684063]
ENSMUSG00000057863	1985.34	-0.252868	0.0691331	-3.6577	0.000254486	0.00740804	1635.55	1796.54	1867.39	1912.02	1936.34	1971.02	2122.98	2401.66	2224.52	Rpl36	54217	ribosomal protein L36 [Source:MGI Symbol;Acc:MGI:1860603]
ENSMUSG00000022843	680.6	0.259715	0.0710703	3.65434	0.000257844	0.00748326	704.53	666.025	751.42	791.871	760.476	621.938	598.536	581.163	649.444	Clcn2	12724	chloride channel, voltage-sensitive 2 [Source:MGI Symbol;Acc:MGI:105061]
ENSMUSG00000040225	6278.19	0.199822	0.054687	3.65392	0.000258271	0.00748326	6968.2	6431.03	6760.65	6311.44	6829.67	5291.11	6336.4	5852.83	5722.34	Prrc2c	226562	proline-rich coiled-coil 2C [Source:MGI Symbol;Acc:MGI:1913754]
ENSMUSG00000024053	163.198	0.546692	0.14967	3.65264	0.00025956	0.00750315	186.975	194.618	175.367	152.962	237.363	110.618	145.936	136.112	128.83	Emilin2	246707	elastin microfibril interfacer 2 [Source:MGI Symbol;Acc:MGI:2389136]
ENSMUSG00000023018	2735.94	0.15997	0.0438076	3.65164	0.000260572	0.00751497	2739.09	2829.31	2936.59	2819.2	3024.56	2633.18	2629.81	2456.29	2555.42	Smarcd1	83797	SWI/SNF related, matrix associated, actin dependent regulator of chromatin, subfamily d, member 1 [Source:MGI Symbol;Acc:MGI:1933623]
ENSMUSG00000075706	1833.33	-0.290816	0.0796557	-3.65091	0.00026131	0.00751884	1562.3	1620.08	1684.58	1621.39	1851.43	2089.37	1707.85	2140.19	2222.76	Gpx4	625249	glutathione peroxidase 4 [Source:MGI Symbol;Acc:MGI:104767]
ENSMUSG00000039168	278.542	-0.408033	0.112074	-3.64074	0.000271852	0.00780416	203.36	237.001	233.822	244.739	296.704	324.893	323.427	339.385	303.544	Dap	223453	death-associated protein [Source:MGI Symbol;Acc:MGI:1918190]
ENSMUSG00000028469	551.565	0.282526	0.0776911	3.63653	0.000276336	0.00791463	559.961	574.338	560.111	651.852	650.01	519.055	469.363	479.079	500.319	Npr2	230103	natriuretic peptide receptor 2 [Source:MGI Symbol;Acc:MGI:97372]
ENSMUSG00000025609	2096.21	0.17037	0.0468827	3.63397	0.00027909	0.00795617	2118.41	2084.57	2289.33	2292.07	2245.82	1963.28	1924.78	2037.21	1910.39	Mkln1	27418	muskelin 1, intracellular mediator containing kelch motifs [Source:MGI Symbol;Acc:MGI:1351638]
ENSMUSG00000037541	825.488	0.284887	0.0784077	3.63341	0.000279702	0.00795617	919.455	1018.93	866.205	817.757	861.811	794.441	675.449	723.544	751.802	Shank2	210274	SH3 and multiple ankyrin repeat domains 2 [Source:MGI Symbol;Acc:MGI:2671987]
ENSMUSG00000049878	1356.36	0.191177	0.0525998	3.63455	0.000278471	0.00795617	1408.1	1475.63	1484.77	1421.37	1385.84	1165.75	1276.94	1323.51	1265.36	Rlf	109263	rearranged L-myc fusion sequence [Source:MGI Symbol;Acc:MGI:1924705]
ENSMUSG00000029781	643.167	-0.467544	0.128776	-3.63069	0.000282668	0.00802223	466.474	517.25	479.336	644.793	639.968	626.579	919.991	739.663	754.449	Fkbp9	27055	FK506 binding protein 9 [Source:MGI Symbol;Acc:MGI:1350921]
ENSMUSG00000017707	2626.5	-0.14548	0.0401051	-3.62746	0.000286226	0.00810458	2563.68	2506.68	2492.33	2455.62	2521.53	2691.97	2665.31	2877.16	2864.26	Serinc3	26943	serine incorporator 3 [Source:MGI Symbol;Acc:MGI:1349457]
ENSMUSG00000028419	1313.44	-0.231062	0.0637148	-3.6265	0.000287291	0.00810458	1263.53	1140.03	1261.58	1255.46	1178.6	1404	1303.57	1566.19	1448.01	Chmp5	76959	charged multivesicular body protein 5 [Source:MGI Symbol;Acc:MGI:1924209]
ENSMUSG00000060739	972.425	-0.356512	0.0983131	-3.62629	0.000287521	0.00810458	933.912	875.347	868.331	828.347	817.078	956.113	952.531	1271.57	1248.59	Nsa2	59050	NSA2 ribosome biogenesis homolog [Source:MGI Symbol;Acc:MGI:1913883]
ENSMUSG00000090862	3359.8	-0.201535	0.0556371	-3.6223	0.000291991	0.00821199	2774.75	3219.41	3301.15	3298.09	3157.85	3537.46	3536.98	3773.53	3639	Rps13	68052	ribosomal protein S13 [Source:MGI Symbol;Acc:MGI:1915302]
ENSMUSG00000020899	1118.09	0.208875	0.0576841	3.62102	0.000293438	0.00823412	1215.34	1187.6	1164.86	1180.16	1199.6	1100.77	1039.3	929.503	1045.64	Pfas	237823	phosphoribosylformylglycinamidine synthase (FGAR amidotransferase) [Source:MGI Symbol;Acc:MGI:2684864]
ENSMUSG00000067629	1316.08	0.267383	0.0738597	3.62015	0.00029443	0.00824338	1449.54	1641.71	1296.65	1373.13	1352.06	1209.84	1255.25	1124.72	1141.82	Syngap1	240057	synaptic Ras GTPase activating protein 1 homolog (rat) [Source:MGI Symbol;Acc:MGI:3039785]
ENSMUSG00000014956	4576.84	-0.153309	0.0423879	-3.61682	0.000298244	0.00833144	4644.5	4392.3	4323.59	4280.58	4155.68	4879.58	4982.54	4910.79	4621.99	Ppp1cb	19046	protein phosphatase 1 catalytic subunit beta [Source:MGI Symbol;Acc:MGI:104871]
ENSMUSG00000026773	471.514	0.646518	0.178823	3.6154	0.000299884	0.00834149	709.349	726.573	569.676	417.703	384.346	382.136	402.311	324.162	327.369	Pfkfb3	170768	6-phosphofructo-2-kinase/fructose-2,6-biphosphatase 3 [Source:MGI Symbol;Acc:MGI:2181202]
ENSMUSG00000062591	3462.98	0.195416	0.0540517	3.61535	0.000299943	0.00834149	3307.72	3745.31	3547.72	3973.48	3774.08	3156.1	3320.05	3178.94	3163.39	Tubb4a	22153	tubulin, beta 4A class IVA [Source:MGI Symbol;Acc:MGI:107848]
ENSMUSG00000070808	622.116	0.249636	0.0691094	3.61219	0.000303626	0.00842511	704.53	678.999	609.001	665.972	688.354	597.184	555.15	570.418	529.438	Bicra	243842	BRD4 interacting chromatin remodeling complex associated protein [Source:MGI Symbol;Acc:MGI:2154263]
ENSMUSG00000027315	169.469	-0.487637	0.135208	-3.60657	0.00031027	0.00859034	179.265	120.23	139.231	130.606	149.721	209.633	182.42	199.691	214.422	Spint1	20732	serine protease inhibitor, Kunitz type 1 [Source:MGI Symbol;Acc:MGI:1338033]
ENSMUSG00000039661	1327.5	-0.260736	0.0723482	-3.60391	0.000313468	0.00865963	1161.37	1153.87	1310.47	1221.34	1255.29	1434.17	1283.85	1506.19	1620.96	Dusp26	66959	dual specificity phosphatase 26 (putative) [Source:MGI Symbol;Acc:MGI:1914209]
ENSMUSG00000048997	449.248	0.269254	0.0747722	3.60099	0.000317005	0.00873796	454.908	498.221	478.273	510.657	489.334	420.814	390.478	376.995	423.55	Atxn7l2	72522	ataxin 7-like 2 [Source:MGI Symbol;Acc:MGI:1919772]
ENSMUSG00000056673	281.705	11.6112	3.22605	3.5992	0.000319202	0.00874052	938.731	714.463	882.148	0	0	0	0	0	0	Kdm5d	20592	lysine (K)-specific demethylase 5D [Source:MGI Symbol;Acc:MGI:99780]
ENSMUSG00000104597	235.929	0.817878	0.227198	3.59985	0.000318403	0.00874052	233.237	513.791	239.136	244.739	229.147	179.465	156.783	160.29	166.773	B230334C09Rik	NA	RIKEN cDNA B230334C09 gene [Source:MGI Symbol;Acc:MGI:2442224]
ENSMUSG00000022204	557.008	-0.288728	0.0802389	-3.59835	0.000320243	0.00874979	537.794	467.947	545.231	481.241	504.854	669.125	570.927	584.745	651.209	Ngdn	68966	neuroguidin, EIF4E binding protein [Source:MGI Symbol;Acc:MGI:1916216]
ENSMUSG00000105388	203.877	-0.409322	0.113776	-3.59761	0.000321156	0.00875555	162.88	198.942	184.932	182.377	160.677	225.104	214.96	261.479	243.541	Rpl36a-ps2	NA	ribosomal protein L36A, pseudogene 2 [Source:MGI Symbol;Acc:MGI:3780887]
ENSMUSG00000018322	445.648	0.27111	0.0754024	3.59551	0.000323754	0.00880711	455.872	503.411	484.65	483.594	484.769	426.229	407.241	364.458	400.608	Tomm34	67145	translocase of outer mitochondrial membrane 34 [Source:MGI Symbol;Acc:MGI:1914395]
ENSMUSG00000002107	7315.72	0.206201	0.0573906	3.59293	0.000326978	0.00887543	7363.35	8633.24	7135.83	8002.25	7744.44	7061.01	6864.93	6577.27	6459.14	Celf2	14007	CUGBP, Elav-like family member 2 [Source:MGI Symbol;Acc:MGI:1338822]
ENSMUSG00000033257	2049.29	0.183285	0.051036	3.59128	0.000329063	0.00891261	2216.71	2028.35	2207.49	2060.28	2306.08	1920.74	1979.02	1838.41	1886.56	Ttll4	67534	tubulin tyrosine ligase-like family, member 4 [Source:MGI Symbol;Acc:MGI:1914784]
ENSMUSG00000018604	1518.42	0.24306	0.0677646	3.58683	0.000334719	0.00904611	1651.93	1472.17	1617.62	1740.23	1673.41	1300.35	1344.98	1323.51	1541.55	Tbx3	21386	T-box 3 [Source:MGI Symbol;Acc:MGI:98495]
ENSMUSG00000039202	1372.49	0.32109	0.0895485	3.58565	0.000336237	0.00906748	1242.32	1805.19	1480.52	1474.32	1526.43	1205.2	1246.38	1221.43	1150.65	Abhd2	NA	abhydrolase domain containing 2 [Source:MGI Symbol;Acc:MGI:1914344]
ENSMUSG00000040554	602.62	-0.515533	0.143804	-3.58497	0.000337114	0.00907149	568.636	420.374	499.529	483.594	558.717	740.292	495.986	798.764	857.69	Aipl1	114230	aryl hydrocarbon receptor-interacting protein-like 1 [Source:MGI Symbol;Acc:MGI:2148800]
ENSMUSG00000018820	1432.93	0.174977	0.0488573	3.58138	0.000341779	0.00913852	1558.45	1492.93	1467.77	1476.67	1552.9	1375.38	1256.24	1329.78	1386.25	Zfyve27	319740	zinc finger, FYVE domain containing 27 [Source:MGI Symbol;Acc:MGI:1919602]
ENSMUSG00000023007	1139.69	0.181676	0.0507282	3.58136	0.000341805	0.00913852	1240.4	1178.95	1244.57	1169.57	1183.16	1112.37	1033.39	1025.32	1069.46	Prpf40b	54614	pre-mRNA processing factor 40B [Source:MGI Symbol;Acc:MGI:1925583]
ENSMUSG00000024914	1817.13	-0.194887	0.0544035	-3.58225	0.00034065	0.00913852	1599.89	1771.45	1682.46	1837.89	1648.76	2039.86	1850.83	1925.27	1997.75	Drap1	66556	Dr1 associated protein 1 (negative cofactor 2 alpha) [Source:MGI Symbol;Acc:MGI:1913806]
ENSMUSG00000024304	6354.04	0.135045	0.0377287	3.57938	0.000344411	0.00918848	6552.8	6456.98	6911.57	6514.99	6645.26	5834.92	6361.05	5978.19	5930.59	Cdh2	12558	cadherin 2 [Source:MGI Symbol;Acc:MGI:88355]
ENSMUSG00000057561	880.785	-0.215369	0.0602264	-3.57599	0.000348908	0.00928857	783.561	800.095	847.074	884.825	797.906	959.208	893.367	990.396	970.636	Eif1a	13664	eukaryotic translation initiation factor 1A [Source:MGI Symbol;Acc:MGI:95298]
ENSMUSG00000001052	1453.21	0.20479	0.0572925	3.57446	0.000350956	0.00932316	1651.93	1499.85	1540.04	1559.03	1469.83	1389.3	1421.89	1299.33	1247.71	Sec24b	99683	Sec24 related gene family, member B (S. cerevisiae) [Source:MGI Symbol;Acc:MGI:2139764]
ENSMUSG00000038803	670.699	-0.245978	0.0688672	-3.57177	0.00035458	0.0093994	552.251	632.291	663.205	603.611	645.446	722.5	755.319	753.99	707.682	Ost4	67695	oligosaccharyltransferase complex subunit 4 (non-catalytic) [Source:MGI Symbol;Acc:MGI:1914945]
ENSMUSG00000041044	202.058	-0.50657	0.142052	-3.56609	0.000362352	0.00958502	218.78	150.504	162.613	140.019	178.935	251.405	206.086	252.524	257.66	Lrit1	239037	leucine-rich repeat, immunoglobulin-like and transmembrane domains 1 [Source:MGI Symbol;Acc:MGI:2385320]
ENSMUSG00000025862	3845.09	-0.187307	0.0525644	-3.56338	0.000366117	0.00964366	3811.79	3632	3842.12	3354.57	3467.33	3965.24	4057.62	4394.1	4081.08	Stag2	20843	stromal antigen 2 [Source:MGI Symbol;Acc:MGI:1098583]
ENSMUSG00000037012	1996.66	0.197866	0.0555222	3.56373	0.000365627	0.00964366	2145.39	2326.76	2022.56	2107.34	1982.9	1901.4	1890.27	1824.08	1769.21	Hk1	15275	hexokinase 1 [Source:MGI Symbol;Acc:MGI:96103]
ENSMUSG00000000563	2723.63	-0.167689	0.047085	-3.5614	0.000368886	0.00969609	2410.44	2624.31	2764.42	2590.94	2523.35	2941.05	2785.61	2972.08	2900.44	Atp5pb	11950	ATP synthase peripheral stalk-membrane subunit b [Source:MGI Symbol;Acc:MGI:1100495]
ENSMUSG00000020340	2827.99	0.189092	0.0531308	3.55899	0.000372283	0.00976477	2974.25	3271.31	3006.74	2819.2	2881.23	2620.8	2786.6	2562.85	2528.95	Cyfip2	76884	cytoplasmic FMR1 interacting protein 2 [Source:MGI Symbol;Acc:MGI:1924134]
ENSMUSG00000097119	557.558	-0.317402	0.0892116	-3.55785	0.000373904	0.00976636	610.079	477.462	481.461	475.358	468.336	640.503	627.132	642.951	594.735	B230354K17Rik	NA	RIKEN cDNA B230354K17 gene [Source:MGI Symbol;Acc:MGI:2443272]
ENSMUSG00000104546	65.0267	0.740989	0.208269	3.55784	0.000373911	0.00976636	69.3928	98.6063	81.8378	60.0081	85.816	56.4695	43.3865	41.1919	48.5318	Gm43858	NA	predicted gene 43858 [Source:MGI Symbol;Acc:MGI:5663995]
ENSMUSG00000025372	315.484	0.312529	0.0879059	3.55527	0.000377591	0.00982132	346	361.556	364.55	324.75	330.483	283.895	249.472	288.343	290.309	Baiap2	108100	brain-specific angiogenesis inhibitor 1-associated protein 2 [Source:MGI Symbol;Acc:MGI:2137336]
ENSMUSG00000027827	241.062	-0.567326	0.159564	-3.55547	0.000377299	0.00982132	154.206	227.486	224.257	192.967	193.542	235.161	248.486	354.608	338.84	Kcnab1	16497	potassium voltage-gated channel, shaker-related subfamily, beta member 1 [Source:MGI Symbol;Acc:MGI:109155]
ENSMUSG00000021832	2144.1	-0.159164	0.0448182	-3.55133	0.000383286	0.00994866	2091.42	2062.08	2130.97	1956.73	1950.03	2215.46	2228.49	2358.68	2303.06	Psmc6	NA	proteasome (prosome, macropain) 26S subunit, ATPase, 6 [Source:MGI Symbol;Acc:MGI:1914339]
ENSMUSG00000013698	7357.93	-0.0979462	0.0275909	-3.54995	0.00038531	0.00998041	7094.45	6988.07	7196.41	7098.6	7299.84	7664.38	7546.29	7549.75	7783.62	Pea15a	18611	phosphoprotein enriched in astrocytes 15A [Source:MGI Symbol;Acc:MGI:104799]
ENSMUSG00000001707	665.532	-0.282079	0.0795485	-3.546	0.000391119	0.0100889	643.811	625.371	606.875	584.785	576.063	751.895	631.076	794.287	775.627	Eef1e1	NA	eukaryotic translation elongation factor 1 epsilon 1 [Source:MGI Symbol;Acc:MGI:1913393]
ENSMUSG00000009549	1161.35	-0.232669	0.0656141	-3.54602	0.000391095	0.0100889	955.115	1075.15	1080.9	1197.81	1080.92	1220.67	1235.53	1293.07	1313.01	Srp14	20813	signal recognition particle 14 [Source:MGI Symbol;Acc:MGI:107169]
ENSMUSG00000026436	611.853	0.287056	0.0809755	3.54497	0.000392655	0.0101076	593.694	657.375	772.676	667.149	636.316	557.733	553.178	541.763	526.791	Elk4	13714	ELK4, member of ETS oncogene family [Source:MGI Symbol;Acc:MGI:102853]
ENSMUSG00000033307	1805.72	0.30994	0.0875427	3.54044	0.000399458	0.0102616	1765.66	2145.98	2354.16	1868.49	1742.79	1581.15	1666.44	1602.9	1523.9	Mif	17319	macrophage migration inhibitory factor (glycosylation-inhibiting factor) [Source:MGI Symbol;Acc:MGI:96982]
ENSMUSG00000037210	1385.27	0.162445	0.0459124	3.53815	0.000402937	0.0103296	1486.16	1449.69	1424.19	1470.79	1437.87	1269.4	1369.63	1257.25	1302.42	Fam193a	231128	family with sequence homology 193, member A [Source:MGI Symbol;Acc:MGI:2447768]
ENSMUSG00000096740	288.887	-0.336831	0.0952418	-3.53658	0.000405336	0.0103698	289.137	248.246	266.77	250.622	239.189	325.666	295.817	348.34	336.193	Lbhd1	NA	LBH domain containing 1 [Source:MGI Symbol;Acc:MGI:5516029]
ENSMUSG00000068457	157.753	10.0525	2.84302	3.53585	0.000406463	0.0103773	554.179	387.505	477.21	0	0	0	0	0	0.882397	Uty	22290	ubiquitously transcribed tetratricopeptide repeat gene, Y chromosome [Source:MGI Symbol;Acc:MGI:894810]
ENSMUSG00000030032	134.438	-0.453672	0.128357	-3.53446	0.000408611	0.0104108	123.365	104.661	115.848	110.603	123.246	163.994	143.964	149.544	174.715	Wdr54	NA	WD repeat domain 54 [Source:MGI Symbol;Acc:MGI:1922909]
ENSMUSG00000041720	2138.08	0.145671	0.0412239	3.53365	0.000409857	0.0104212	2311.17	2294.76	2211.75	2166.17	2179.18	1968.7	2092.41	2002.28	2016.28	Pi4ka	224020	phosphatidylinositol 4-kinase alpha [Source:MGI Symbol;Acc:MGI:2448506]
ENSMUSG00000022604	697.353	0.416151	0.117798	3.53275	0.00041126	0.0104356	1052.46	691.974	716.346	743.629	719.393	582.487	559.094	614.296	596.5	Cep97	74201	centrosomal protein 97 [Source:MGI Symbol;Acc:MGI:1921451]
ENSMUSG00000064337	3949.17	-0.283911	0.0804055	-3.53098	0.000414018	0.0104842	3486.99	3839.59	3320.28	3807.57	3552.23	4534.58	3668.13	5015.56	4317.57	mt-Rnr1	NA	mitochondrially encoded 12S rRNA [Source:MGI Symbol;Acc:MGI:102493]
ENSMUSG00000014602	7739.84	0.199922	0.0566434	3.52948	0.000416372	0.0105225	8431.23	9188.55	7828.79	7652.79	7954.41	6760.09	7284.99	7367.97	7189.77	Kif1a	16560	kinesin family member 1A [Source:MGI Symbol;Acc:MGI:108391]
ENSMUSG00000024830	553.583	0.262468	0.0743938	3.52809	0.000418564	0.0105417	602.368	549.254	600.498	650.676	587.931	515.961	525.568	459.379	490.613	Rps6kb2	58988	ribosomal protein S6 kinase, polypeptide 2 [Source:MGI Symbol;Acc:MGI:1927343]
ENSMUSG00000061601	1411.09	0.264449	0.0749589	3.52793	0.000418826	0.0105417	1613.38	1701.39	1429.5	1347.24	1528.25	1214.48	1232.57	1386.2	1246.83	Pclo	26875	piccolo (presynaptic cytomatrix protein) [Source:MGI Symbol;Acc:MGI:1349390]
ENSMUSG00000030042	658.686	-0.24812	0.0703703	-3.52592	0.000422011	0.0106005	558.998	614.992	594.121	631.85	640.881	719.406	657.7	755.781	754.449	Pole4	66979	polymerase (DNA-directed), epsilon 4 (p12 subunit) [Source:MGI Symbol;Acc:MGI:1914229]
ENSMUSG00000053550	654.177	0.457823	0.129895	3.52455	0.000424198	0.010634	662.123	1002.5	628.132	756.572	670.095	489.66	518.666	569.522	590.323	Shisa7	232813	shisa family member 7 [Source:MGI Symbol;Acc:MGI:3605641]
ENSMUSG00000027009	240.866	0.389782	0.110772	3.51878	0.000433531	0.0108461	294.919	244.786	268.896	288.274	249.231	184.106	207.072	234.615	195.892	Itga4	16401	integrin alpha 4 [Source:MGI Symbol;Acc:MGI:96603]
ENSMUSG00000040724	728.99	0.282537	0.0803239	3.51747	0.000435682	0.0108675	727.661	858.913	871.519	763.632	735.826	625.806	623.188	717.276	637.09	Kcna2	16490	potassium voltage-gated channel, shaker-related subfamily, member 2 [Source:MGI Symbol;Acc:MGI:96659]
ENSMUSG00000070733	2244.54	0.21616	0.061458	3.5172	0.000436129	0.0108675	2585.85	2234.21	2475.33	2181.47	2483.19	2003.51	2193.98	2070.34	1973.04	Fryl	72313	FRY like transcription coactivator [Source:MGI Symbol;Acc:MGI:1919563]
ENSMUSG00000024566	1115.15	0.162036	0.0460852	3.51601	0.000438084	0.0108727	1175.82	1204.03	1178.68	1141.33	1151.21	1052.81	1048.18	1033.38	1050.93	Atp9b	50771	ATPase, class II, type 9B [Source:MGI Symbol;Acc:MGI:1354757]
ENSMUSG00000033209	3771.42	0.213366	0.0606823	3.51612	0.00043791	0.0108727	3667.22	4402.68	3774.1	4091.14	4146.55	3277.55	3499.51	3692.94	3391.05	Ttc28	209683	tetratricopeptide repeat domain 28 [Source:MGI Symbol;Acc:MGI:2140873]
ENSMUSG00000034586	539.079	0.275024	0.0782465	3.51484	0.000440017	0.0108773	581.165	662.565	544.168	555.369	576.063	508.225	487.112	479.079	457.964	Hid1	217310	HID1 domain containing [Source:MGI Symbol;Acc:MGI:2445087]
ENSMUSG00000036764	244.284	-0.32217	0.091654	-3.51507	0.000439638	0.0108773	223.599	213.647	222.131	212.97	227.321	287.762	256.375	282.97	271.778	Dnajc12	NA	DnaJ heat shock protein family (Hsp40) member C12 [Source:MGI Symbol;Acc:MGI:1353428]
ENSMUSG00000048707	610.713	0.261591	0.0744395	3.51415	0.000441166	0.0108841	650.558	646.131	707.844	609.494	683.789	601.825	506.833	556.09	533.85	Tprn	97031	taperin [Source:MGI Symbol;Acc:MGI:2139535]
ENSMUSG00000015120	3411.15	0.218101	0.062143	3.50966	0.000448682	0.0110477	3126.53	3605.18	3774.1	3744.03	3940.23	3079.52	3195.81	3134.16	3100.74	Ube2i	22196	ubiquitin-conjugating enzyme E2I [Source:MGI Symbol;Acc:MGI:107365]
ENSMUSG00000025403	2718.35	0.172578	0.0492553	3.50375	0.00045875	0.0112733	2987.75	2748.87	2988.67	2835.68	2749.76	2657.93	2619.95	2386.44	2490.12	Shmt2	108037	serine hydroxymethyltransferase 2 (mitochondrial) [Source:MGI Symbol;Acc:MGI:1277989]
ENSMUSG00000033499	2429.78	0.135934	0.0388195	3.5017	0.000462299	0.0113382	2530.91	2526.57	2611.37	2532.11	2455.8	2376.36	2340.9	2233.32	2260.7	Larp4b	217980	La ribonucleoprotein domain family, member 4B [Source:MGI Symbol;Acc:MGI:106330]
ENSMUSG00000021359	1386.61	0.318937	0.0911535	3.4989	0.000467181	0.0113915	1726.15	1357.13	1563.42	1593.16	1364.84	1332.83	1327.23	1141.73	1072.99	Tfap2a	21418	transcription factor AP-2, alpha [Source:MGI Symbol;Acc:MGI:104671]
ENSMUSG00000031862	1275.58	0.174075	0.0497589	3.49836	0.00046813	0.0113915	1352.2	1348.48	1330.66	1360.18	1325.58	1209.84	1247.36	1103.23	1202.71	Atp13a1	170759	ATPase type 13A1 [Source:MGI Symbol;Acc:MGI:2180801]
ENSMUSG00000039481	95.3283	-0.598128	0.170902	-3.49983	0.000465557	0.0113915	79.9945	70.0624	70.1467	81.1874	86.7289	102.109	97.6196	127.157	142.948	Nrtn	18188	neurturin [Source:MGI Symbol;Acc:MGI:108417]
ENSMUSG00000043068	84.907	-0.540095	0.154365	-3.49882	0.000467314	0.0113915	77.1031	66.6025	72.2723	64.7146	72.1219	101.336	115.369	95.8158	98.8284	Fam89a	69627	family with sequence similarity 89, member A [Source:MGI Symbol;Acc:MGI:1916877]
ENSMUSG00000037466	680.76	0.249664	0.0714171	3.49585	0.000472548	0.0114766	796.09	746.467	750.357	728.333	641.794	623.485	615.299	621.46	603.559	Tedc1	104732	tubulin epsilon and delta complex 1 [Source:MGI Symbol;Acc:MGI:2144738]
ENSMUSG00000023032	916.119	0.25843	0.0739842	3.49304	0.000477556	0.0115531	958.97	1140.89	972.488	920.124	945.802	826.156	857.869	848.911	773.862	Slc4a8	59033	solute carrier family 4 (anion exchanger), member 8 [Source:MGI Symbol;Acc:MGI:1928745]
ENSMUSG00000031245	1160.91	-0.382284	0.109436	-3.49321	0.000477248	0.0115531	811.51	994.712	1143.6	1243.7	923.891	1269.4	1254.26	1343.21	1463.9	Hmgn5	50887	high-mobility group nucleosome binding domain 5 [Source:MGI Symbol;Acc:MGI:1355295]
ENSMUSG00000042292	485.21	0.271744	0.0778126	3.49229	0.000478905	0.0115633	534.903	534.55	498.467	505.95	551.413	458.718	472.321	398.486	412.079	Mrtfa	223701	myocardin related transcription factor A [Source:MGI Symbol;Acc:MGI:2384495]
ENSMUSG00000025658	540.869	0.29524	0.0846102	3.48941	0.000484079	0.0116312	562.853	670.35	582.43	607.14	524.025	505.905	495	468.334	451.787	Cnksr2	245684	connector enhancer of kinase suppressor of Ras 2 [Source:MGI Symbol;Acc:MGI:2661175]
ENSMUSG00000049092	275.06	0.358969	0.102868	3.48962	0.000483706	0.0116312	309.376	283.709	333.728	312.983	284.836	235.934	272.152	231.928	210.893	Gpr137c	70713	G protein-coupled receptor 137C [Source:MGI Symbol;Acc:MGI:1917963]
ENSMUSG00000063646	120.356	0.995642	0.285352	3.48917	0.000484517	0.0116312	72.2842	266.41	148.796	144.725	140.592	73.4877	68.0379	83.2792	85.5925	Jakmip1	76071	janus kinase and microtubule interacting protein 1 [Source:MGI Symbol;Acc:MGI:1923321]
ENSMUSG00000100164	171.297	-0.407686	0.116886	-3.48789	0.000486854	0.0116648	152.279	154.829	139.231	136.489	164.328	194.936	176.504	209.541	213.54	2610306M01Rik	67170	RIKEN cDNA 2610306M01 gene [Source:MGI Symbol;Acc:MGI:1914420]
ENSMUSG00000035566	1161.01	-0.294553	0.0844946	-3.48606	0.000490193	0.0117223	1233.65	952.329	1027.76	987.192	1073.61	1437.26	1299.62	1182.92	1254.77	Pcdh17	219228	protocadherin 17 [Source:MGI Symbol;Acc:MGI:2684924]
ENSMUSG00000034781	1409.72	0.169881	0.0487443	3.48514	0.000491873	0.0117399	1483.27	1559.54	1430.57	1483.73	1456.13	1305.76	1322.3	1262.62	1383.6	Gna11	14672	guanine nucleotide binding protein, alpha 11 [Source:MGI Symbol;Acc:MGI:95766]
ENSMUSG00000034771	181.296	0.454699	0.130519	3.48379	0.000494366	0.0117492	215.889	221.432	158.361	215.323	218.192	136.919	158.755	162.081	144.713	Tle2	21886	transducin-like enhancer of split 2 [Source:MGI Symbol;Acc:MGI:104635]
ENSMUSG00000042744	3195.68	0.224469	0.0644341	3.4837	0.000494525	0.0117492	3697.1	3667.46	3364.91	2969.81	3367.82	2794.85	3058.75	2947.9	2892.5	Hectd4	269700	HECT domain E3 ubiquitin protein ligase 4 [Source:MGI Symbol;Acc:MGI:3647820]
ENSMUSG00000101970	264.266	0.506642	0.145445	3.4834	0.000495089	0.0117492	208.178	307.928	335.854	356.519	314.05	211.954	193.267	223.869	226.776	1810026B05Rik	69170	RIKEN cDNA 1810026B05 gene [Source:MGI Symbol;Acc:MGI:1916420]
ENSMUSG00000029207	1519.98	0.163062	0.0468364	3.48153	0.000498563	0.0117867	1534.35	1677.17	1595.31	1616.69	1555.64	1469.75	1449.5	1393.36	1388.01	Apbb2	11787	amyloid beta (A4) precursor protein-binding, family B, member 2 [Source:MGI Symbol;Acc:MGI:108405]
ENSMUSG00000037933	2153.17	-0.325858	0.0935841	-3.48198	0.000497713	0.0117867	2351.65	1890.82	1841.88	1639.04	1951.86	2593.73	2144.67	2390.02	2574.83	Bicd2	76895	BICD cargo adaptor 2 [Source:MGI Symbol;Acc:MGI:1924145]
ENSMUSG00000000120	926.77	0.320399	0.0920547	3.48053	0.000500427	0.0118084	1115.1	932.435	903.404	1067.2	1066.31	766.593	708.975	861.447	919.457	Ngfr	18053	nerve growth factor receptor (TNFR superfamily, member 16) [Source:MGI Symbol;Acc:MGI:97323]
ENSMUSG00000020926	3322.06	0.195761	0.0563185	3.47595	0.000509041	0.0119889	3609.39	3195.19	3715.65	3573.42	3513.89	3248.93	2870.41	2972.98	3198.69	Adam11	11488	a disintegrin and metallopeptidase domain 11 [Source:MGI Symbol;Acc:MGI:1098667]
ENSMUSG00000024608	9768.39	-0.539212	0.155173	-3.47492	0.000511003	0.0120124	7661.16	7843.52	7444.05	7901.06	9804.02	11907.3	8527.42	12525.9	14301	Rps14	20044	ribosomal protein S14 [Source:MGI Symbol;Acc:MGI:98107]
ENSMUSG00000003190	285.311	0.393292	0.113304	3.47113	0.000518273	0.0121148	312.268	328.688	303.969	323.573	327.744	282.347	259.333	191.632	238.247	Bcl2l12	75736	BCL2-like 12 (proline rich) [Source:MGI Symbol;Acc:MGI:1922986]
ENSMUSG00000003378	1967.38	0.212845	0.0613173	3.47121	0.000518124	0.0121148	1991.19	2278.32	2008.75	2176.76	2021.24	1846.47	1739.4	1690.66	1953.63	Grik5	14809	glutamate receptor, ionotropic, kainate 5 (gamma 2) [Source:MGI Symbol;Acc:MGI:95818]
ENSMUSG00000027419	279.461	0.380615	0.109647	3.47127	0.000518	0.0121148	296.847	374.531	283.775	300.04	302.182	254.499	224.821	255.21	223.246	Pcsk2	18549	proprotein convertase subtilisin/kexin type 2 [Source:MGI Symbol;Acc:MGI:97512]
ENSMUSG00000020163	678.044	-0.236404	0.0682363	-3.46449	0.000531243	0.0123127	592.73	638.346	644.074	609.494	656.401	709.35	694.184	751.304	806.511	Uqcr11	66594	ubiquinol-cytochrome c reductase, complex III subunit XI [Source:MGI Symbol;Acc:MGI:1913844]
ENSMUSG00000037894	7428.42	-0.198441	0.0572824	-3.46427	0.000531681	0.0123127	6873.74	6623.05	7911.69	6697.37	6753.9	7901.09	7567	8258.07	8269.82	H2az1	51788	H2A.Z variant histone 1 [Source:MGI Symbol;Acc:MGI:1888388]
ENSMUSG00000050229	901.491	0.247852	0.071504	3.46627	0.000527735	0.0123127	848.134	973.953	1015	989.545	1019.75	749.574	858.855	825.628	832.983	Pigm	67556	phosphatidylinositol glycan anchor biosynthesis, class M [Source:MGI Symbol;Acc:MGI:1914806]
ENSMUSG00000051185	398.372	-0.292218	0.0843358	-3.46493	0.00053036	0.0123127	373.95	350.312	324.163	382.404	379.781	406.116	440.767	454.006	473.847	Fam174a	67698	family with sequence similarity 174, member A [Source:MGI Symbol;Acc:MGI:1914948]
ENSMUSG00000079641	1841.83	-0.319129	0.0921136	-3.46451	0.000531193	0.0123127	1345.45	1791.35	1724.97	1588.45	1844.13	1813.99	2098.33	2245.85	2123.93	Rpl39	NA	ribosomal protein L39 [Source:MGI Symbol;Acc:MGI:1914498]
ENSMUSG00000022450	677.31	-0.274542	0.0792827	-3.46283	0.000534533	0.0123557	596.585	584.718	632.383	657.736	628.1	700.84	669.532	821.151	804.746	Ndufa6	67130	NADH:ubiquinone oxidoreductase subunit A6 [Source:MGI Symbol;Acc:MGI:1914380]
ENSMUSG00000046668	4174.91	-0.136107	0.0393112	-3.46228	0.000535612	0.0123577	3979.49	3778.18	3951.6	4201.74	4089.04	4506.73	4408.66	4335.89	4322.86	Cxxc5	67393	CXXC finger 5 [Source:MGI Symbol;Acc:MGI:1914643]
ENSMUSG00000027170	1427.05	-0.225214	0.0650734	-3.46091	0.000538345	0.0123799	1291.48	1271.5	1409.31	1295.47	1369.4	1442.68	1435.7	1658.42	1669.49	Eif3m	98221	eukaryotic translation initiation factor 3, subunit M [Source:MGI Symbol;Acc:MGI:1351744]
ENSMUSG00000037138	816.774	0.252843	0.073059	3.46081	0.00053856	0.0123799	877.048	973.088	794.996	837.76	912.936	758.857	759.264	757.572	679.445	Aff3	16764	AF4/FMR2 family, member 3 [Source:MGI Symbol;Acc:MGI:106927]
ENSMUSG00000071644	3882.91	-0.154134	0.0445783	-3.45761	0.000544987	0.0125046	3604.57	3676.11	3564.73	3789.92	3852.59	4254.55	4315.97	3928.45	3959.31	Eef1g	NA	eukaryotic translation elongation factor 1 gamma [Source:MGI Symbol;Acc:MGI:1914410]
ENSMUSG00000031386	5474.95	0.149812	0.0433506	3.45583	0.000548596	0.0125182	5953.33	5404.32	5698.89	5506.62	6064.63	5171.99	5317.8	5054.06	5102.9	Hcfc1	15161	host cell factor C1 [Source:MGI Symbol;Acc:MGI:105942]
ENSMUSG00000038738	1140.69	0.410045	0.11863	3.45651	0.000547209	0.0125182	1204.74	1744.64	1102.15	1174.28	1180.43	969.264	1029.44	928.608	932.693	Shank1	243961	SH3 and multiple ankyrin repeat domains 1 [Source:MGI Symbol;Acc:MGI:3613677]
ENSMUSG00000070493	1645.04	-0.20494	0.0593002	-3.45597	0.000548324	0.0125182	1422.55	1609.7	1572.99	1563.74	1533.73	1686.35	1665.45	1916.32	1834.5	Chchd2	14004	coiled-coil-helix-coiled-coil-helix domain containing 2 [Source:MGI Symbol;Acc:MGI:1261428]
ENSMUSG00000043999	63.2711	0.894607	0.258995	3.45415	0.000552027	0.0125735	47.2257	93.4165	81.8378	107.073	68.4702	35.5835	53.2471	35.819	46.767	Gpr75	237716	G protein-coupled receptor 75 [Source:MGI Symbol;Acc:MGI:2441843]
ENSMUSG00000034829	79.1449	-0.667146	0.193384	-3.44984	0.00056091	0.0127525	79.0307	49.3031	47.8273	64.7146	73.0349	102.883	85.7869	101.189	108.535	Nxnl1	234404	nucleoredoxin-like 1 [Source:MGI Symbol;Acc:MGI:1924446]
ENSMUSG00000030757	540.993	0.245334	0.0712074	3.44535	0.000570323	0.0129238	599.477	574.338	549.482	562.429	618.971	451.756	500.917	506.839	504.731	Zkscan2	210162	zinc finger with KRAB and SCAN domains 2 [Source:MGI Symbol;Acc:MGI:2444060]
ENSMUSG00000030960	551.462	-0.21404	0.0621259	-3.44526	0.000570519	0.0129238	516.591	511.196	508.032	505.95	531.329	575.525	598.536	608.028	607.971	Eef1akmt2	72096	EEF1A lysine methyltransferase 2 [Source:MGI Symbol;Acc:MGI:1919346]
ENSMUSG00000021782	2065.38	0.163305	0.0474421	3.4422	0.000577012	0.013009	2200.33	2250.64	2255.32	2010.86	2121.66	1901.4	2014.51	1912.74	1920.98	Dlg5	71228	discs large MAGUK scaffold protein 5 [Source:MGI Symbol;Acc:MGI:1918478]
ENSMUSG00000028957	299.056	0.357196	0.103775	3.44201	0.000577414	0.013009	329.616	279.384	335.854	356.519	356.958	283.121	261.305	234.615	254.13	Per3	18628	period circadian clock 3 [Source:MGI Symbol;Acc:MGI:1277134]
ENSMUSG00000041126	4249.62	-0.205682	0.0597503	-3.44236	0.000576652	0.013009	3812.75	3848.24	4219.43	3971.12	4044.31	4580.22	4057.62	4735.27	4977.6	H2az2	77605	H2A.Z histone variant 2 [Source:MGI Symbol;Acc:MGI:1924855]
ENSMUSG00000008822	281.045	-0.298512	0.0868851	-3.43571	0.000590995	0.013291	251.549	245.651	255.079	265.918	257.448	300.913	296.803	331.326	324.722	Acyp1	66204	acylphosphatase 1, erythrocyte (common) type [Source:MGI Symbol;Acc:MGI:1913454]
ENSMUSG00000026893	135.933	0.50701	0.147681	3.43314	0.000596638	0.0133937	187.939	153.099	161.55	150.608	129.637	119.127	122.271	102.98	96.1812	Gca	227960	grancalcin [Source:MGI Symbol;Acc:MGI:1918521]
ENSMUSG00000040952	3007.95	-0.23225	0.0676889	-3.43114	0.000601044	0.0134683	2432.6	2837.09	2979.11	2822.73	2884.88	3047.8	3169.19	3291.77	3606.36	Rps19	20085	ribosomal protein S19 [Source:MGI Symbol;Acc:MGI:1333780]
ENSMUSG00000026675	390.886	0.369851	0.107913	3.4273	0.000609621	0.013636	473.22	436.808	435.76	420.056	407.169	307.101	277.082	372.518	388.255	Hsd17b7	15490	hydroxysteroid (17-beta) dehydrogenase 7 [Source:MGI Symbol;Acc:MGI:1330808]
ENSMUSG00000038766	1416.81	0.194494	0.0567777	3.42553	0.000613598	0.0137004	1540.14	1421.14	1579.36	1440.19	1521.86	1261.67	1425.84	1294.86	1266.24	Gabpb2	213054	GA repeat binding protein, beta 2 [Source:MGI Symbol;Acc:MGI:95612]
ENSMUSG00000022255	2483.83	-0.129006	0.0376694	-3.4247	0.00061548	0.0137178	2439.35	2439.21	2394.55	2322.67	2327.07	2678.82	2611.08	2539.57	2602.19	Mtdh	67154	metadherin [Source:MGI Symbol;Acc:MGI:1914404]
ENSMUSG00000015671	2130.51	-0.226043	0.0660503	-3.42228	0.000620974	0.0137664	1875.53	2090.63	2064.01	1959.09	1916.25	2148.93	2132.84	2415.1	2572.19	Psma2	NA	proteasome (prosome, macropain) subunit, alpha type 2 [Source:MGI Symbol;Acc:MGI:104885]
ENSMUSG00000033389	402.783	0.264165	0.0771829	3.42258	0.000620299	0.0137664	472.257	416.914	412.377	443.589	430.906	354.288	348.078	371.622	375.019	Arhgap44	216831	Rho GTPase activating protein 44 [Source:MGI Symbol;Acc:MGI:2144423]
ENSMUSG00000067870	298.946	-0.387345	0.113173	-3.42259	0.000620266	0.0137664	270.825	264.68	217.88	277.684	283.923	360.476	312.58	307.148	395.314	Rpl31-ps8	NA	ribosomal protein L31, pseudogene 8 [Source:MGI Symbol;Acc:MGI:3647726]
ENSMUSG00000024589	889.615	0.309609	0.0904888	3.42152	0.000622723	0.0137806	945.477	1192.79	910.844	931.89	883.722	835.439	789.831	764.736	751.802	Nedd4l	83814	neural precursor cell expressed, developmentally down-regulated gene 4-like [Source:MGI Symbol;Acc:MGI:1933754]
ENSMUSG00000069565	1991.64	0.156029	0.0456479	3.41811	0.000630587	0.0139299	1958.42	2102.74	2117.15	2212.06	2046.8	1919.96	1856.74	1837.52	1873.33	Dazap1	70248	DAZ associated protein 1 [Source:MGI Symbol;Acc:MGI:1917498]
ENSMUSG00000029714	2024.33	0.241683	0.0707618	3.41544	0.000636792	0.0140307	2128.05	2025.75	2208.56	2350.9	2157.27	1926.15	1617.13	1767.67	2037.45	Gigyf1	57330	GRB10 interacting GYF protein 1 [Source:MGI Symbol;Acc:MGI:1888677]
ENSMUSG00000043843	524.238	0.391407	0.114608	3.41518	0.000637402	0.0140307	478.039	688.514	544.168	653.029	567.846	484.245	403.297	411.919	487.083	Tmem145	330485	transmembrane protein 145 [Source:MGI Symbol;Acc:MGI:3607779]
ENSMUSG00000097392	634.333	0.225909	0.0661763	3.41374	0.000640774	0.0140801	727.661	637.481	638.76	714.214	672.834	577.845	582.759	586.536	570.911	Thoc2l	NA	THO complex subunit 2-like [Source:MGI Symbol;Acc:MGI:3040669]
ENSMUSG00000009575	7311.48	0.132029	0.0386813	3.41325	0.000641925	0.0140805	7358.53	7665.34	7924.45	7590.43	7495.2	6845.18	7368.8	6825.31	6730.04	Cbx5	12419	chromobox 5 [Source:MGI Symbol;Acc:MGI:109372]
ENSMUSG00000061313	592.848	0.208048	0.0609731	3.41213	0.000644567	0.0141136	621.644	645.266	611.126	624.79	649.097	559.28	547.261	527.435	549.733	Ddhd2	72108	DDHD domain containing 2 [Source:MGI Symbol;Acc:MGI:1919358]
ENSMUSG00000025260	579.205	-0.251903	0.0738545	-3.41079	0.000647742	0.0141583	497.315	552.714	598.372	504.774	515.809	629.673	671.505	622.355	620.325	Hsd17b10	15108	hydroxysteroid (17-beta) dehydrogenase 10 [Source:MGI Symbol;Acc:MGI:1333871]
ENSMUSG00000024943	2083.97	0.139636	0.0410145	3.40455	0.000662733	0.0144606	2116.48	2158.09	2257.45	2207.36	2127.14	1935.43	1976.06	2047.95	1929.8	Smc5	226026	structural maintenance of chromosomes 5 [Source:MGI Symbol;Acc:MGI:2385088]
ENSMUSG00000029406	888.189	0.24972	0.0733724	3.40346	0.000665378	0.0144676	920.419	1034.5	827.943	990.721	1004.23	837.76	809.552	762.945	805.628	Pitpnm2	19679	phosphatidylinositol transfer protein, membrane-associated 2 [Source:MGI Symbol;Acc:MGI:1336192]
ENSMUSG00000034799	1124.97	0.258259	0.0758788	3.40358	0.000665093	0.0144676	1174.86	1433.25	1123.41	1173.1	1160.34	1014.13	1000.85	983.232	1061.52	Unc13a	382018	unc-13 homolog A [Source:MGI Symbol;Acc:MGI:3051532]
ENSMUSG00000036940	3243.57	0.118458	0.0348205	3.40195	0.000669068	0.0144973	3361.7	3414.89	3440.38	3322.8	3267.4	3166.93	3142.56	3030.29	3045.15	Kdm1a	99982	lysine (K)-specific demethylase 1A [Source:MGI Symbol;Acc:MGI:1196256]
ENSMUSG00000061576	1084.68	0.189718	0.055764	3.40216	0.000668562	0.0144973	1130.52	1249.01	1090.46	1117.8	1146.65	973.132	1012.68	1029.8	1012.11	Dpp6	13483	dipeptidylpeptidase 6 [Source:MGI Symbol;Acc:MGI:94921]
ENSMUSG00000041028	2559.63	-0.162179	0.0476847	-3.40107	0.000671236	0.0144984	2496.21	2428.83	2440.25	2356.79	2432.06	2604.56	2582.48	2933.58	2761.9	Ghitm	NA	growth hormone inducible transmembrane protein [Source:MGI Symbol;Acc:MGI:1913342]
ENSMUSG00000052040	2455.87	0.195188	0.0573916	3.40098	0.000671446	0.0144984	2920.28	2482.46	2583.74	2517.99	2507.83	2398.79	2243.28	2194.81	2253.64	Klf13	50794	Kruppel-like factor 13 [Source:MGI Symbol;Acc:MGI:1354948]
ENSMUSG00000004891	1818.01	0.195628	0.0575587	3.39876	0.000676914	0.0145659	2031.67	1911.58	1850.38	2002.62	1837.74	1777.63	1778.85	1587.68	1583.9	Nes	18008	nestin [Source:MGI Symbol;Acc:MGI:101784]
ENSMUSG00000028798	1810.63	-0.151909	0.0446931	-3.39893	0.000676508	0.0145659	1623.02	1765.4	1736.66	1726.11	1775.66	1883.61	1860.69	1964.67	1959.8	Eif3i	54709	eukaryotic translation initiation factor 3, subunit I [Source:MGI Symbol;Acc:MGI:1860763]
ENSMUSG00000031103	99.8306	0.500222	0.14726	3.39687	0.000681619	0.0146419	128.184	115.041	103.094	109.426	117.769	76.5819	76.9124	79.6973	91.7693	Elf4	56501	E74-like factor 4 (ets domain transcription factor) [Source:MGI Symbol;Acc:MGI:1928377]
ENSMUSG00000028576	1369.57	-0.247632	0.0729519	-3.39445	0.000687654	0.0147461	1118.96	1262.85	1418.88	1255.46	1266.24	1412.51	1427.81	1636.03	1527.43	Ift74	67694	intraflagellar transport 74 [Source:MGI Symbol;Acc:MGI:1914944]
ENSMUSG00000022312	3246.91	-0.175375	0.0517511	-3.38882	0.000701939	0.0150266	3032.08	2985	3149.16	3029.82	3157.85	3395.13	3161.3	3583.69	3728.13	Eif3h	68135	eukaryotic translation initiation factor 3, subunit H [Source:MGI Symbol;Acc:MGI:1915385]
ENSMUSG00000036257	1370.44	-0.175701	0.0518649	-3.38767	0.000704903	0.0150641	1293.41	1332.05	1324.28	1297.82	1231.55	1414.06	1431.75	1575.14	1433.89	Pnpla8	67452	patatin-like phospholipase domain containing 8 [Source:MGI Symbol;Acc:MGI:1914702]
ENSMUSG00000038902	2162.97	0.176906	0.0522652	3.38478	0.000712343	0.0151971	2214.79	2203.07	2196.87	2375.61	2410.15	2103.29	2097.34	1979	1886.56	Pogz	229584	pogo transposable element with ZNF domain [Source:MGI Symbol;Acc:MGI:2442117]
ENSMUSG00000020848	1008.65	-0.316239	0.0934502	-3.38404	0.000714288	0.0152125	996.558	854.588	920.409	838.936	937.585	1096.9	939.712	1177.55	1315.65	Doc2b	13447	double C2, beta [Source:MGI Symbol;Acc:MGI:1100497]
ENSMUSG00000028898	577.182	-0.27492	0.0812636	-3.38307	0.000716802	0.01524	566.708	507.736	522.912	516.54	526.764	645.145	547.261	667.129	694.446	Trnau1ap	71787	tRNA selenocysteine 1 associated protein 1 [Source:MGI Symbol;Acc:MGI:1919037]
ENSMUSG00000019461	606.946	0.264921	0.0783718	3.38032	0.000724027	0.0153674	613.934	642.671	617.503	737.746	669.182	582.487	561.066	498.78	539.144	Plscr3	70310	phospholipid scramblase 3 [Source:MGI Symbol;Acc:MGI:1917560]
ENSMUSG00000026425	1517.58	0.22935	0.0678738	3.37906	0.000727335	0.0153899	1595.07	1871.79	1499.65	1516.67	1632.33	1422.57	1392.31	1353.96	1373.89	Srgap2	14270	SLIT-ROBO Rho GTPase activating protein 2 [Source:MGI Symbol;Acc:MGI:109605]
ENSMUSG00000044308	2945.44	0.154123	0.0456204	3.37839	0.000729119	0.0153899	3047.5	3254.01	3159.79	2907.45	3048.29	2629.31	2804.34	2863.73	2794.55	Ubr3	68795	ubiquitin protein ligase E3 component n-recognin 3 [Source:MGI Symbol;Acc:MGI:1861100]
ENSMUSG00000066224	81.3788	0.623216	0.18449	3.37805	0.000730029	0.0153899	110.836	76.1171	105.22	91.777	98.5971	63.4315	53.2471	56.4149	76.7685	Arid3c	550619	AT rich interactive domain 3C (BRIGHT-like) [Source:MGI Symbol;Acc:MGI:3650624]
ENSMUSG00000070953	352.713	-0.311008	0.0920474	-3.37878	0.000728094	0.0153899	333.471	294.954	322.037	318.866	325.005	401.475	356.952	372.518	449.14	Rabepk	227746	Rab9 effector protein with kelch motifs [Source:MGI Symbol;Acc:MGI:2139530]
ENSMUSG00000029420	361.356	0.308385	0.0913049	3.37753	0.000731397	0.0153927	399.972	451.513	364.55	387.111	372.478	345.005	307.65	307.148	316.78	Rimbp2	231760	RIMS binding protein 2 [Source:MGI Symbol;Acc:MGI:2443235]
ENSMUSG00000001833	3647.52	-0.160786	0.0476188	-3.37652	0.000734079	0.0154231	3535.18	3526.47	3626.37	3438.11	3203.49	3773.4	3889.99	4096.8	3737.83	Sept7	235072	septin 7 [Source:MGI Symbol;Acc:MGI:1335094]
ENSMUSG00000054874	2001.2	0.173872	0.0515092	3.37555	0.000736681	0.0154517	2273.58	2031.81	2032.13	2030.86	2167.31	1875.87	1955.35	1783.79	1860.09	Pcnx3	104401	pecanex homolog 3 [Source:MGI Symbol;Acc:MGI:1861733]
ENSMUSG00000029775	2105.04	0.187291	0.0555196	3.37342	0.000742417	0.0155458	2254.3	2387.31	2194.74	2128.52	2160.01	2029.81	2087.48	1855.42	1847.74	Klhdc10	76788	kelch domain containing 10 [Source:MGI Symbol;Acc:MGI:1924038]
ENSMUSG00000038538	2508.81	0.159484	0.04729	3.37247	0.000744973	0.0155471	2714.99	2606.15	2654.95	2587.41	2592.74	2475.37	2454.29	2312.12	2181.28	Ubn2	320538	ubinuclein 2 [Source:MGI Symbol;Acc:MGI:2444236]
ENSMUSG00000061028	954.801	0.227887	0.06757	3.37261	0.000744599	0.0155471	935.839	1005.09	1079.83	1103.68	984.145	900.418	848.995	813.987	921.222	Clasrp	53609	CLK4-associating serine/arginine rich protein [Source:MGI Symbol;Acc:MGI:1855695]
ENSMUSG00000024426	1521.48	0.291265	0.0864136	3.37059	0.000750074	0.0156239	1661.57	1911.58	1500.71	1640.22	1565.69	1522.36	1418.94	1194.56	1277.71	Atat1	73242	alpha tubulin acetyltransferase 1 [Source:MGI Symbol;Acc:MGI:1913869]
ENSMUSG00000064370	61243	-0.193192	0.0573237	-3.37019	0.000751161	0.0156239	53474.9	62370.2	57995.4	58626.7	55414.3	63684.4	60650.4	71587.9	67382.5	mt-Cytb	17711	mitochondrially encoded cytochrome b [Source:MGI Symbol;Acc:MGI:102501]
ENSMUSG00000070923	1699.41	-0.269965	0.0801225	-3.3694	0.000753308	0.0156424	1847.58	1536.18	1602.75	1359.01	1437.87	1813.99	1881.4	1961.09	1854.8	Klhl9	242521	kelch-like 9 [Source:MGI Symbol;Acc:MGI:2180122]
ENSMUSG00000029030	1467.6	-0.187851	0.0557913	-3.36703	0.000759815	0.0157513	1349.3	1337.24	1366.8	1374.3	1482.61	1494.51	1501.76	1627.08	1674.79	Tprgl	67808	transformation related protein 63 regulated like [Source:MGI Symbol;Acc:MGI:1915058]
ENSMUSG00000063882	1502.43	-0.210161	0.0624815	-3.36358	0.00076939	0.0159233	1296.3	1492.07	1439.07	1334.3	1459.78	1591.98	1496.83	1706.78	1704.79	Uqcrh	66576	ubiquinol-cytochrome c reductase hinge protein [Source:MGI Symbol;Acc:MGI:1913826]
ENSMUSG00000019590	155.07	0.57582	0.171342	3.36065	0.000777605	0.0159947	144.568	199.807	147.733	192.967	222.756	105.977	105.508	128.948	147.36	Cyb561	13056	cytochrome b-561 [Source:MGI Symbol;Acc:MGI:103253]
ENSMUSG00000021962	775.194	0.195226	0.0580785	3.36141	0.00077545	0.0159947	832.714	765.496	817.315	863.646	829.859	724.821	721.793	694.889	726.213	Dcp1a	75901	decapping mRNA 1A [Source:MGI Symbol;Acc:MGI:1923151]
ENSMUSG00000031328	6602.44	0.171055	0.0509014	3.36052	0.000777973	0.0159947	6867	6693.98	6769.15	7205.67	7200.33	5860.45	6816.61	5998.79	6010	Flna	192176	filamin, alpha [Source:MGI Symbol;Acc:MGI:95556]
ENSMUSG00000039087	1410.26	0.226262	0.0673054	3.36172	0.000774596	0.0159947	1413.88	1401.25	1569.8	1517.85	1635.98	1252.38	1184.25	1392.46	1324.48	Rreb1	68750	ras responsive element binding protein 1 [Source:MGI Symbol;Acc:MGI:2443664]
ENSMUSG00000030428	3884.82	0.199594	0.0595034	3.35433	0.000795572	0.0163295	4631.01	3895.81	4048.31	4069.96	3964.88	3798.15	3330.9	3579.21	3645.18	Ttyh1	57776	tweety family member 1 [Source:MGI Symbol;Acc:MGI:1889007]
ENSMUSG00000021018	352.788	-0.27019	0.0806133	-3.35168	0.000803221	0.0163837	323.833	309.658	333.728	330.633	319.528	400.701	371.743	418.187	367.077	Polr2h	245841	polymerase (RNA) II (DNA directed) polypeptide H [Source:MGI Symbol;Acc:MGI:2384309]
ENSMUSG00000028804	464.08	0.437817	0.130602	3.35231	0.000801416	0.0163837	448.162	702.353	477.21	477.711	518.548	368.986	439.781	369.831	374.136	Csmd2	329942	CUB and Sushi multiple domains 2 [Source:MGI Symbol;Acc:MGI:2386401]
ENSMUSG00000042390	2510.84	0.177781	0.0530436	3.3516	0.000803473	0.0163837	2450.92	2731.57	2690.02	2641.53	2720.55	2363.98	2503.6	2325.55	2169.81	Gatad2b	229542	GATA zinc finger domain containing 2B [Source:MGI Symbol;Acc:MGI:2443225]
ENSMUSG00000053477	5433.12	0.348963	0.104104	3.35207	0.000802098	0.0163837	5935.98	7747.51	6070.88	5223.06	5054.93	5110.1	4787.3	4568.71	4399.63	Tcf4	21413	transcription factor 4 [Source:MGI Symbol;Acc:MGI:98506]
ENSMUSG00000038872	1483.88	0.253573	0.075689	3.3502	0.000807532	0.0164396	1439.9	1472.17	1631.44	1860.25	1590.33	1304.99	1397.24	1384.4	1274.18	Zfhx3	11906	zinc finger homeobox 3 [Source:MGI Symbol;Acc:MGI:99948]
ENSMUSG00000022708	804.869	0.285811	0.0853408	3.34906	0.000810873	0.0164508	884.758	1032.77	872.582	783.635	798.819	764.272	706.016	705.634	695.329	Zbtb20	56490	zinc finger and BTB domain containing 20 [Source:MGI Symbol;Acc:MGI:1929213]
ENSMUSG00000032745	3088.11	-0.145757	0.0435271	-3.34866	0.000812044	0.0164508	2961.72	2914.07	3159.79	2902.74	2808.19	3276	3155.38	3368.78	3246.34	Gpbp1	73274	GC-rich promoter binding protein 1 [Source:MGI Symbol;Acc:MGI:1920524]
ENSMUSG00000047417	1659.24	0.166653	0.0497561	3.34939	0.000809883	0.0164508	1657.72	1710.91	1780.24	1806.13	1764.71	1522.36	1595.44	1465	1630.67	Rexo1	66932	REX1, RNA exonuclease 1 [Source:MGI Symbol;Acc:MGI:1914182]
ENSMUSG00000020611	1539.65	0.143676	0.0429237	3.34724	0.000816212	0.016455	1622.06	1600.19	1618.69	1563.74	1629.59	1396.27	1455.42	1499.03	1471.84	Gna13	14674	guanine nucleotide binding protein, alpha 13 [Source:MGI Symbol;Acc:MGI:95768]
ENSMUSG00000023020	496.307	-0.298861	0.089266	-3.34798	0.000814023	0.016455	427.922	455.838	464.456	460.062	444.6	571.657	458.516	572.209	611.501	Cox14	NA	cytochrome c oxidase assembly protein 14 [Source:MGI Symbol;Acc:MGI:1913629]
ENSMUSG00000024948	478.675	0.271317	0.0810533	3.3474	0.000815745	0.016455	479.967	555.309	476.147	563.605	516.722	460.265	424.99	412.814	418.256	Map4k2	26412	mitogen-activated protein kinase kinase kinase kinase 2 [Source:MGI Symbol;Acc:MGI:1346883]
ENSMUSG00000015189	1564.05	-0.200393	0.0599287	-3.34385	0.00082623	0.0165616	1585.43	1410.76	1478.39	1390.78	1468	1622.14	1643.76	1850.95	1626.26	Casd1	213819	CAS1 domain containing 1 [Source:MGI Symbol;Acc:MGI:2384865]
ENSMUSG00000037355	702.18	0.206309	0.0617017	3.34366	0.000826819	0.0165616	733.444	711.003	765.236	775.398	746.782	624.259	692.212	647.429	623.854	Uvssa	71101	UV stimulated scaffold protein A [Source:MGI Symbol;Acc:MGI:1918351]
ENSMUSG00000037674	2146.67	0.144766	0.0432858	3.34443	0.000824523	0.0165616	2262.01	2199.61	2331.85	2165	2249.47	2053.01	2107.2	2026.46	1925.39	Rfx7	319758	regulatory factor X, 7 [Source:MGI Symbol;Acc:MGI:2442675]
ENSMUSG00000042210	326.318	-0.432709	0.129381	-3.34445	0.000824462	0.0165616	221.671	326.093	351.796	257.682	254.709	373.627	372.729	381.472	397.079	Abhd14a	68644	abhydrolase domain containing 14A [Source:MGI Symbol;Acc:MGI:1915894]
ENSMUSG00000040537	1963.82	0.153263	0.0458683	3.34138	0.000833633	0.0166713	2043.23	2153.77	2149.04	1988.5	1943.64	1843.38	1882.38	1848.26	1822.15	Adam22	11496	a disintegrin and metallopeptidase domain 22 [Source:MGI Symbol;Acc:MGI:1340046]
ENSMUSG00000039007	206.196	-0.556717	0.166716	-3.33931	0.00083988	0.0167635	141.677	145.315	173.241	211.793	180.761	193.389	321.454	253.419	234.718	Cpq	54381	carboxypeptidase Q [Source:MGI Symbol;Acc:MGI:1889205]
ENSMUSG00000055320	1878.28	0.233816	0.0700266	3.33896	0.000840933	0.0167635	2049.98	1815.57	1971.55	2088.52	2134.44	1710.33	1919.85	1548.28	1665.97	Tead1	21676	TEA domain family member 1 [Source:MGI Symbol;Acc:MGI:101876]
ENSMUSG00000034820	2283.87	0.187531	0.0561728	3.33846	0.000842433	0.0167666	2421.04	2280.05	2381.8	2541.52	2452.15	2303.65	2173.27	1970.94	2030.39	Cpsf7	269061	cleavage and polyadenylation specific factor 7 [Source:MGI Symbol;Acc:MGI:1917826]
ENSMUSG00000063787	551.793	-0.246329	0.0738288	-3.33649	0.000848438	0.0168592	469.365	539.74	536.728	505.95	496.637	590.222	559.094	631.31	637.09	Chchd1	66121	coiled-coil-helix-coiled-coil-helix domain containing 1 [Source:MGI Symbol;Acc:MGI:1913371]
ENSMUSG00000026442	1623.54	0.266357	0.0798772	3.33458	0.00085427	0.016948	1583.51	2104.47	1727.1	1677.87	1680.71	1426.43	1397.24	1465.89	1548.61	Nfasc	269116	neurofascin [Source:MGI Symbol;Acc:MGI:104753]
ENSMUSG00000028655	117.459	0.541048	0.162406	3.33145	0.000863944	0.0171127	120.474	175.588	120.1	131.782	133.289	95.1472	107.48	82.3837	90.8869	Mfsd2a	76574	major facilitator superfamily domain containing 2A [Source:MGI Symbol;Acc:MGI:1923824]
ENSMUSG00000012114	879.369	0.22586	0.0678064	3.33096	0.000865467	0.0171156	935.839	887.456	920.409	1003.66	954.931	870.249	796.734	722.649	822.394	Med15	94112	mediator complex subunit 15 [Source:MGI Symbol;Acc:MGI:2137379]
ENSMUSG00000106037	267.407	-0.31321	0.0940471	-3.33036	0.000867349	0.0171257	228.418	239.596	250.828	227.089	260.187	307.101	325.399	287.448	280.602	Gm4332	NA	predicted gene 4332 [Source:MGI Symbol;Acc:MGI:3782515]
ENSMUSG00000024072	593.68	-0.233431	0.0701173	-3.32915	0.00087113	0.017146	587.911	518.115	552.671	563.605	533.155	674.54	619.244	684.143	609.736	Yipf4	67864	Yip1 domain family, member 4 [Source:MGI Symbol;Acc:MGI:1915114]
ENSMUSG00000037876	2601.54	0.162414	0.0487837	3.32927	0.000870735	0.017146	2648.49	2828.44	2855.82	2590.94	2727.85	2343.87	2383.3	2610.31	2424.83	Jmjd1c	108829	jumonji domain containing 1C [Source:MGI Symbol;Acc:MGI:1918614]
ENSMUSG00000022449	149.105	0.49044	0.14741	3.32706	0.000877688	0.0172478	126.256	191.158	183.869	178.848	175.284	122.222	107.48	124.471	132.36	Adamts20	223838	a disintegrin-like and metallopeptidase (reprolysin type) with thrombospondin type 1 motif, 20 [Source:MGI Symbol;Acc:MGI:2660628]
ENSMUSG00000026032	667.297	-0.227195	0.0683179	-3.32555	0.000882438	0.0173138	611.042	641.806	605.812	617.73	624.448	688.464	669.532	785.332	761.508	Ndufb3	66495	NADH:ubiquinone oxidoreductase subunit B3 [Source:MGI Symbol;Acc:MGI:1913745]
ENSMUSG00000045624	1209.83	-0.17819	0.0535936	-3.32483	0.000884723	0.0173314	1123.78	1139.16	1213.75	1168.39	1072.7	1274.04	1234.54	1320.83	1341.24	Esf1	66580	ESF1 nucleolar pre-rRNA processing protein homolog [Source:MGI Symbol;Acc:MGI:1913830]
ENSMUSG00000017778	688.48	-0.271881	0.0818598	-3.3213	0.000896001	0.0174973	549.36	657.375	665.331	631.85	647.272	686.143	742.501	841.747	774.744	Cox7c	NA	cytochrome c oxidase subunit 7C [Source:MGI Symbol;Acc:MGI:103226]
ENSMUSG00000058831	2029.41	-0.350096	0.105401	-3.32155	0.000895198	0.0174973	1629.77	1848.44	1967.3	1574.33	2023.98	2825.79	1948.45	2193.91	2252.76	Opn1sw	12057	opsin 1 (cone pigments), short-wave-sensitive (color blindness, tritan) [Source:MGI Symbol;Acc:MGI:99438]
ENSMUSG00000061751	1084.17	0.307025	0.0924567	3.32074	0.000897787	0.0175047	1151.73	1435.85	1110.66	1036.61	1187.73	862.513	968.308	983.232	1020.93	Kalrn	545156	kalirin, RhoGEF kinase [Source:MGI Symbol;Acc:MGI:2685385]
ENSMUSG00000038975	775.048	-0.231829	0.0699408	-3.31465	0.000917596	0.017863	805.728	674.674	703.592	713.037	700.222	891.135	874.632	804.137	808.275	Rabggtb	19352	Rab geranylgeranyl transferase, b subunit [Source:MGI Symbol;Acc:MGI:99537]
ENSMUSG00000026114	231.064	-0.515975	0.155722	-3.31344	0.000921543	0.0179119	190.83	172.993	218.943	160.022	227.321	286.215	200.169	309.834	313.251	Cnga3	12790	cyclic nucleotide gated channel alpha 3 [Source:MGI Symbol;Acc:MGI:1341818]
ENSMUSG00000035596	755.636	0.207634	0.0627284	3.31004	0.000932818	0.0181028	787.416	836.423	749.294	843.643	799.732	693.105	743.487	678.77	668.857	Mboat7	77582	membrane bound O-acyltransferase domain containing 7 [Source:MGI Symbol;Acc:MGI:1924832]
ENSMUSG00000037965	2321.06	0.167267	0.0505404	3.30957	0.000934409	0.0181055	2481.76	2322.44	2527.41	2463.86	2404.67	2252.59	2312.3	2066.76	2057.75	Zc3h7a	106205	zinc finger CCCH type containing 7 A [Source:MGI Symbol;Acc:MGI:2445044]
ENSMUSG00000028556	2830.65	0.148079	0.0447507	3.30897	0.000936403	0.0181159	3048.47	3123.4	2999.3	2812.14	2808.19	2659.48	2740.25	2653.29	2631.31	Dock7	67299	dedicator of cytokinesis 7 [Source:MGI Symbol;Acc:MGI:1914549]
ENSMUSG00000040356	1493.88	0.170709	0.0516168	3.30723	0.000942222	0.0182002	1640.37	1492.07	1524.1	1587.27	1615.9	1442.68	1450.49	1319.04	1373.01	Skiv2l	NA	superkiller viralicidic activity 2-like (S. cerevisiae) [Source:MGI Symbol;Acc:MGI:1099835]
ENSMUSG00000024497	206.982	-0.454717	0.137625	-3.30404	0.000953039	0.0183148	229.382	174.723	178.555	155.315	150.634	256.82	219.891	231.033	266.484	Pou4f3	NA	POU domain, class 4, transcription factor 3 [Source:MGI Symbol;Acc:MGI:102523]
ENSMUSG00000038346	935.077	0.174838	0.0529079	3.30457	0.000951227	0.0183148	1004.27	985.198	959.734	1017.78	958.583	884.173	905.2	871.297	829.453	Zfp384	269800	zinc finger protein 384 [Source:MGI Symbol;Acc:MGI:2443203]
ENSMUSG00000050786	230.563	-0.401537	0.12154	-3.30374	0.000954032	0.0183148	226.49	179.913	195.56	196.497	210.888	261.461	220.877	309.834	273.543	Ccdc126	57895	coiled-coil domain containing 126 [Source:MGI Symbol;Acc:MGI:1889376]
ENSMUSG00000090266	268.537	-0.436064	0.131986	-3.30385	0.000953663	0.0183148	299.738	198.078	244.451	211.793	207.236	331.855	279.054	334.908	309.721	Mettl23	74319	methyltransferase like 23 [Source:MGI Symbol;Acc:MGI:1921569]
ENSMUSG00000047675	4488.45	-0.221605	0.0670981	-3.3027	0.000957591	0.0183323	3606.5	4161.36	4504.27	4393.53	4236.02	4604.97	4620.66	5092.57	5176.14	Rps8	NA	ribosomal protein S8 [Source:MGI Symbol;Acc:MGI:98166]
ENSMUSG00000086288	116.676	0.464789	0.140734	3.30261	0.000957889	0.0183323	125.293	122.825	125.414	142.372	149.721	106.751	84.8009	97.6068	95.2988	Gm15265	NA	predicted gene 15265 [Source:MGI Symbol;Acc:MGI:3705193]
ENSMUSG00000034891	492.542	0.281615	0.085289	3.30189	0.000960347	0.0183512	551.287	576.068	480.398	576.548	490.247	478.057	427.949	418.187	434.139	Sncb	104069	synuclein, beta [Source:MGI Symbol;Acc:MGI:1889011]
ENSMUSG00000043323	1436.43	0.201653	0.0610825	3.30133	0.000962283	0.01836	1429.3	1577.7	1473.08	1596.69	1550.17	1410.19	1193.13	1341.42	1356.24	Fbrsl1	NA	fibrosin-like 1 [Source:MGI Symbol;Acc:MGI:1920907]
ENSMUSG00000019647	1524.93	0.229559	0.0695638	3.29998	0.000966919	0.0184202	1620.13	1712.64	1710.09	1670.81	1444.26	1413.28	1535.29	1315.45	1302.42	Sema6a	20358	sema domain, transmembrane domain (TM), and cytoplasmic domain, (semaphorin) 6A [Source:MGI Symbol;Acc:MGI:1203727]
ENSMUSG00000020850	7948.96	0.134373	0.0407273	3.29935	0.000969095	0.0184335	8284.73	7981.92	8162.52	8051.67	8895.65	7343.35	7821.4	7519.31	7480.08	Prpf8	192159	pre-mRNA processing factor 8 [Source:MGI Symbol;Acc:MGI:2179381]
ENSMUSG00000053565	1814.74	-0.210305	0.0637658	-3.29808	0.000973486	0.0184888	1559.41	1629.6	1771.74	1702.58	1820.39	1954.77	1784.76	2000.49	2108.93	Eif3k	73830	eukaryotic translation initiation factor 3, subunit K [Source:MGI Symbol;Acc:MGI:1921080]
ENSMUSG00000032244	4405.44	-0.139165	0.0422184	-3.29631	0.000979651	0.0185776	4475.84	4155.3	4191.8	4018.19	4233.28	4421.64	4689.68	4802.43	4660.82	Fem1b	14155	fem 1 homolog b [Source:MGI Symbol;Acc:MGI:1335087]
ENSMUSG00000031511	2463.5	0.169024	0.0512921	3.29533	0.000983071	0.0186141	2479.83	2876.02	2546.54	2547.4	2501.44	2274.25	2340.9	2286.15	2318.94	Arhgef7	54126	Rho guanine nucleotide exchange factor (GEF7) [Source:MGI Symbol;Acc:MGI:1860493]
ENSMUSG00000022483	5837.59	0.220145	0.0668153	3.29483	0.000984809	0.0186187	6733.03	5249.49	6135.71	6542.06	6489.15	5526.27	5375.98	5151.67	5334.97	Col2a1	12824	collagen, type II, alpha 1 [Source:MGI Symbol;Acc:MGI:88452]
ENSMUSG00000004562	1372.5	0.195765	0.0594455	3.29319	0.000990589	0.0186996	1483.27	1383.08	1509.22	1479.02	1420.53	1375.38	1316.39	1183.82	1201.82	Arhgef40	268739	Rho guanine nucleotide exchange factor (GEF) 40 [Source:MGI Symbol;Acc:MGI:2685515]
ENSMUSG00000030091	1538.32	0.193136	0.0586587	3.29254	0.000992873	0.0187144	1494.84	1633.92	1615.5	1639.04	1761.97	1491.41	1460.35	1330.68	1417.13	Nup210	54563	nucleoporin 210 [Source:MGI Symbol;Acc:MGI:1859555]
ENSMUSG00000021699	490.539	0.377361	0.114685	3.29042	0.00100037	0.0188271	441.415	649.59	563.299	516.54	559.63	399.154	488.098	384.159	412.962	Pde4d	238871	phosphodiesterase 4D, cAMP specific [Source:MGI Symbol;Acc:MGI:99555]
ENSMUSG00000005973	1989.5	-0.242807	0.0738189	-3.28922	0.00100464	0.0188507	1775.3	1740.31	1800.43	1973.21	1908.04	1981.85	2502.61	2216.3	2007.45	Rcn1	NA	reticulocalbin 1 [Source:MGI Symbol;Acc:MGI:104559]
ENSMUSG00000030739	1615.63	0.216752	0.0658921	3.28949	0.00100369	0.0188507	1759.88	1613.16	1795.12	1671.99	1774.75	1579.6	1291.73	1544.69	1509.78	Myh14	71960	myosin, heavy polypeptide 14 [Source:MGI Symbol;Acc:MGI:1919210]
ENSMUSG00000020776	1617.78	0.147403	0.0448374	3.2875	0.00101081	0.0188527	1679.88	1749.83	1686.71	1690.82	1646.94	1586.56	1556.98	1458.73	1503.6	Fbf1	217335	Fas (TNFRSF6) binding factor 1 [Source:MGI Symbol;Acc:MGI:1922033]
ENSMUSG00000053141	795.219	0.299562	0.0911072	3.28801	0.00100897	0.0188527	862.591	1030.18	891.713	782.458	768.692	660.616	706.016	760.258	694.446	Ptprt	19281	protein tyrosine phosphatase, receptor type, T [Source:MGI Symbol;Acc:MGI:1321152]
ENSMUSG00000053693	1444.98	0.206669	0.0628648	3.28752	0.00101074	0.0188527	1488.09	1728.2	1457.14	1535.5	1470.74	1386.98	1337.09	1253.67	1347.42	Mast1	56527	microtubule associated serine/threonine kinase 1 [Source:MGI Symbol;Acc:MGI:1861901]
ENSMUSG00000090553	1333.61	-0.205464	0.0624808	-3.28843	0.00100747	0.0188527	1123.78	1248.15	1325.35	1270.76	1277.2	1434.94	1324.27	1485.59	1512.43	Snrpe	20643	small nuclear ribonucleoprotein E [Source:MGI Symbol;Acc:MGI:98346]
ENSMUSG00000020121	964.954	0.252181	0.0767962	3.28377	0.0010243	0.0190189	1006.2	1186.74	991.619	1014.25	995.1	934.454	923.935	836.374	795.922	Srgap1	117600	SLIT-ROBO Rho GTPase activating protein 1 [Source:MGI Symbol;Acc:MGI:2152936]
ENSMUSG00000035770	3112.61	0.122168	0.0372002	3.28406	0.00102323	0.0190189	3316.4	3241.03	3290.52	3174.54	3123.15	2989.01	2977.89	3044.62	2856.32	Dync1li2	234663	dynein, cytoplasmic 1 light intermediate chain 2 [Source:MGI Symbol;Acc:MGI:107738]
ENSMUSG00000053617	1454.81	0.195067	0.0593929	3.28435	0.00102218	0.0190189	1464	1680.63	1531.54	1486.08	1542.86	1390.85	1418.94	1330.68	1247.71	Sh3pxd2a	14218	SH3 and PX domains 2A [Source:MGI Symbol;Acc:MGI:1298393]
ENSMUSG00000095567	1317.99	0.171537	0.0522955	3.28014	0.00103756	0.0192365	1310.75	1393.46	1350.85	1443.72	1436.96	1257.8	1283.85	1166.8	1217.71	Noc2l	57741	NOC2 like nucleolar associated transcriptional repressor [Source:MGI Symbol;Acc:MGI:1931051]
ENSMUSG00000062115	1893.39	0.164815	0.0502552	3.27956	0.00103968	0.0192472	1874.57	2027.48	2034.25	1934.38	2071.45	1699.5	1758.14	1749.76	1890.98	Rai1	19377	retinoic acid induced 1 [Source:MGI Symbol;Acc:MGI:103291]
ENSMUSG00000009569	629.004	0.265264	0.0809104	3.27849	0.00104365	0.019292	697.783	666.89	660.016	650.676	720.306	505.905	652.769	555.195	551.498	Mrtfb	239719	myocardin related transcription factor B [Source:MGI Symbol;Acc:MGI:3050795]
ENSMUSG00000041415	2663.35	0.127794	0.0389864	3.27793	0.00104573	0.0193019	2889.44	2748.87	2742.1	2736.84	2717.81	2428.19	2598.26	2566.43	2542.18	Dicer1	192119	dicer 1, ribonuclease type III [Source:MGI Symbol;Acc:MGI:2177178]
ENSMUSG00000021071	1010.42	0.355461	0.108465	3.2772	0.00104842	0.0193229	1010.05	1379.62	1115.97	1046.02	1042.57	797.535	756.305	966.218	979.46	Trim9	94090	tripartite motif-containing 9 [Source:MGI Symbol;Acc:MGI:2137354]
ENSMUSG00000047904	210.323	-0.325081	0.0992122	-3.27662	0.00105057	0.0193339	200.468	202.402	188.121	171.788	181.674	238.255	234.681	235.51	240.012	Sstr2	20606	somatostatin receptor 2 [Source:MGI Symbol;Acc:MGI:98328]
ENSMUSG00000023026	1403.85	0.210441	0.0642619	3.27473	0.00105762	0.0194349	1612.42	1579.43	1495.4	1301.35	1478.04	1301.12	1328.22	1269.78	1268.89	Dip2b	239667	disco interacting protein 2 homolog B [Source:MGI Symbol;Acc:MGI:2145977]
ENSMUSG00000074129	9812.88	-0.287563	0.0878817	-3.27216	0.00106728	0.0195835	7544.54	8898.78	9328.45	8710.58	10202.1	11038.6	9234.42	11213.1	12145.3	Rpl13a	22121	ribosomal protein L13A [Source:MGI Symbol;Acc:MGI:1351455]
ENSMUSG00000022452	1025.29	-0.176524	0.0539826	-3.27001	0.00107542	0.019704	950.296	930.705	1011.81	964.836	990.535	1110.05	1044.23	1071.88	1153.29	Smdt1	NA	single-pass membrane protein with aspartate rich tail 1 [Source:MGI Symbol;Acc:MGI:1916279]
ENSMUSG00000003623	1781.29	-0.260262	0.0796163	-3.26896	0.00107945	0.0197488	1951.67	1569.05	1685.65	1504.91	1475.3	1887.47	1908.02	2067.65	1981.86	Crot	74114	carnitine O-octanoyltransferase [Source:MGI Symbol;Acc:MGI:1921364]
ENSMUSG00000031543	232.707	0.34678	0.106197	3.26544	0.00109292	0.0199659	248.658	291.494	247.639	268.271	229.147	189.521	200.169	203.273	216.187	Ank1	11733	ankyrin 1, erythroid [Source:MGI Symbol;Acc:MGI:88024]
ENSMUSG00000070394	504.19	-0.268634	0.0822781	-3.26495	0.00109485	0.0199718	408.647	482.652	469.77	460.062	489.334	530.658	511.763	588.327	596.5	Tmem256	NA	transmembrane protein 256 [Source:MGI Symbol;Acc:MGI:1916436]
ENSMUSG00000069895	1104.81	0.203692	0.0624415	3.26213	0.00110579	0.0201418	1058.24	1191.92	1206.31	1181.34	1229.72	984.735	965.349	1087.11	1038.58	Atxn1l	52335	ataxin 1-like [Source:MGI Symbol;Acc:MGI:3694797]
ENSMUSG00000021910	7805.54	0.137652	0.0422164	3.26062	0.0011117	0.0202199	8607.6	7841.79	7872.37	8112.86	8236.51	7447.01	7804.64	7221.11	7105.94	Nisch	64652	nischarin [Source:MGI Symbol;Acc:MGI:1928323]
ENSMUSG00000024097	4315.81	-0.145581	0.044697	-3.25706	0.00112574	0.0204454	4368.86	4075.73	4299.14	3953.47	3910.1	4627.4	4477.68	4694.98	4434.93	Srsf7	225027	serine/arginine-rich splicing factor 7 [Source:MGI Symbol;Acc:MGI:1926232]
ENSMUSG00000005779	2891.9	-0.161461	0.0495957	-3.25555	0.00113171	0.0204843	2599.34	2805.09	2846.25	2729.78	2757.98	3105.82	2821.11	3120.73	3241.04	Psmb4	NA	proteasome (prosome, macropain) subunit, beta type 4 [Source:MGI Symbol;Acc:MGI:1098257]
ENSMUSG00000020564	282.43	0.292037	0.0896987	3.25575	0.00113092	0.0204843	291.064	322.633	312.472	305.923	304.921	248.311	250.458	274.015	232.07	Atxn7l1	380753	ataxin 7-like 1 [Source:MGI Symbol;Acc:MGI:3584458]
ENSMUSG00000025816	1354.83	0.184093	0.0565552	3.2551	0.00113351	0.0204843	1355.09	1420.28	1423.13	1527.26	1433.31	1367.64	1217.78	1229.49	1219.47	Sec61a2	57743	Sec61, alpha subunit 2 (S. cerevisiae) [Source:MGI Symbol;Acc:MGI:1931071]
ENSMUSG00000036270	1610.96	0.132094	0.0405837	3.25487	0.00113445	0.0204843	1680.85	1669.39	1656.95	1657.87	1716.32	1564.13	1493.88	1511.56	1547.72	Edc4	234699	enhancer of mRNA decapping 4 [Source:MGI Symbol;Acc:MGI:2446249]
ENSMUSG00000029016	1415.13	0.152769	0.0469491	3.25393	0.00113822	0.0205225	1518.93	1537.05	1447.57	1416.66	1484.43	1381.57	1342.02	1299.33	1308.59	Clcn6	26372	chloride channel, voltage-sensitive 6 [Source:MGI Symbol;Acc:MGI:1347049]
ENSMUSG00000024384	1675.16	0.142841	0.0439064	3.25331	0.00114071	0.0205376	1793.61	1655.55	1765.36	1757.88	1770.18	1585.79	1636.85	1560.81	1550.37	Iws1	73473	IWS1, SUPT6 interacting protein [Source:MGI Symbol;Acc:MGI:1920723]
ENSMUSG00000035227	1985.88	-0.166159	0.0510958	-3.25192	0.00114629	0.0206084	1807.1	1886.49	1930.1	1995.56	1803.05	2107.16	1974.09	2216.3	2153.05	Spcs2	66624	signal peptidase complex subunit 2 homolog (S. cerevisiae) [Source:MGI Symbol;Acc:MGI:1913874]
ENSMUSG00000045991	844.104	0.284693	0.0875848	3.25048	0.00115212	0.0206833	893.433	814.799	952.294	936.597	989.623	840.08	800.678	721.753	647.679	Onecut2	NA	one cut domain, family member 2 [Source:MGI Symbol;Acc:MGI:1891408]
ENSMUSG00000044763	347.154	-0.283282	0.0871904	-3.24901	0.00115808	0.0207605	320.942	307.928	339.042	298.864	316.789	382.136	345.12	422.664	390.902	Trmt10c	NA	tRNA methyltransferase 10C, mitochondrial RNase P subunit [Source:MGI Symbol;Acc:MGI:1196261]
ENSMUSG00000028439	989.141	0.212181	0.0654023	3.24425	0.00117759	0.0210606	986.92	1184.14	1023.5	1016.61	1053.53	953.793	894.353	900.848	888.574	Fam219a	71901	family with sequence similarity 219, member A [Source:MGI Symbol;Acc:MGI:1919151]
ENSMUSG00000041272	1987.07	0.210651	0.0649334	3.24411	0.0011782	0.0210606	1988.3	1913.31	2141.6	2273.25	2259.52	1908.36	1909.99	1774.83	1714.5	Tox	252838	thymocyte selection-associated high mobility group box [Source:MGI Symbol;Acc:MGI:2181659]
ENSMUSG00000032328	2304.21	-0.166743	0.0514124	-3.24324	0.00118177	0.0210941	2261.05	2318.98	2248.94	2052.04	2043.15	2509.41	2495.71	2446.44	2362.18	Tmem30a	69981	transmembrane protein 30A [Source:MGI Symbol;Acc:MGI:106402]
ENSMUSG00000029068	2940.01	0.238343	0.0735245	3.24168	0.00118829	0.0211499	3305.8	2821.52	2914.28	3533.42	3195.28	2943.38	2680.1	2570.01	2496.3	Ccnl2	56036	cyclin L2 [Source:MGI Symbol;Acc:MGI:1927119]
ENSMUSG00000030084	2876.1	0.189092	0.0583305	3.24173	0.00118807	0.0211499	3279.77	3244.49	2903.65	2842.74	2936	2507.86	2778.71	2616.58	2775.14	Plxna1	18844	plexin A1 [Source:MGI Symbol;Acc:MGI:107685]
ENSMUSG00000021643	644.903	-0.267378	0.0825208	-3.24012	0.00119478	0.0212047	512.736	624.506	627.069	623.613	570.585	741.065	665.588	770.109	668.857	Serf1	20365	small EDRK-rich factor 1 [Source:MGI Symbol;Acc:MGI:1337114]
ENSMUSG00000022253	1336.98	-0.175948	0.0542972	-3.24046	0.00119336	0.0212047	1276.06	1227.39	1322.16	1269.58	1226.99	1372.29	1341.04	1496.34	1500.96	Nadk2	68646	NAD kinase 2, mitochondrial [Source:MGI Symbol;Acc:MGI:1915896]
ENSMUSG00000006471	859.738	0.223132	0.0688773	3.23956	0.00119714	0.0212165	984.029	813.934	902.341	955.423	937.585	826.93	779.971	745.035	792.392	Ndor1	78797	NADPH dependent diflavin oxidoreductase 1 [Source:MGI Symbol;Acc:MGI:1926047]
ENSMUSG00000019578	1300.98	-0.224962	0.06948	-3.2378	0.00120457	0.0213178	1236.54	1196.25	1147.85	1268.41	1204.16	1438.04	1223.7	1441.72	1552.14	Ubxn6	66530	UBX domain protein 6 [Source:MGI Symbol;Acc:MGI:1913780]
ENSMUSG00000027423	1286.1	-0.14939	0.0461711	-3.23556	0.00121403	0.0214548	1246.18	1210.95	1190.37	1258.99	1226.07	1349.08	1423.87	1337.84	1331.54	Snx5	69178	sorting nexin 5 [Source:MGI Symbol;Acc:MGI:1916428]
ENSMUSG00000033658	999.3	0.183394	0.0567302	3.23274	0.00122607	0.0216369	987.884	1045.75	1037.32	1054.26	1150.3	921.303	932.809	937.563	926.517	Ddx19b	NA	DEAD (Asp-Glu-Ala-Asp) box polypeptide 19b [Source:MGI Symbol;Acc:MGI:2148251]
ENSMUSG00000024855	1201.47	0.184279	0.057031	3.23121	0.00123267	0.0217033	1265.46	1351.94	1161.67	1231.93	1331.06	1106.18	1152.7	1097.85	1114.47	Pacs1	NA	phosphofurin acidic cluster sorting protein 1 [Source:MGI Symbol;Acc:MGI:1277113]
ENSMUSG00000036438	10840.1	-0.160982	0.0498234	-3.23106	0.00123332	0.0217033	9713.07	10538.8	10995	10456.7	9797.63	11346.5	10789.4	12153.4	11770.3	Calm2	12314	calmodulin 2 [Source:MGI Symbol;Acc:MGI:103250]
ENSMUSG00000020532	1348.4	0.217685	0.0674255	3.22853	0.00124429	0.0218434	1466.89	1585.49	1510.28	1271.94	1352.06	1210.61	1278.92	1224.11	1235.36	Acaca	107476	acetyl-Coenzyme A carboxylase alpha [Source:MGI Symbol;Acc:MGI:108451]
ENSMUSG00000021704	1020.57	0.208708	0.0646473	3.22841	0.00124479	0.0218434	962.825	1117.54	1142.54	1137.8	1068.13	933.68	935.768	987.709	899.162	Mtx3	382793	metaxin 3 [Source:MGI Symbol;Acc:MGI:2686040]
ENSMUSG00000025508	3943.9	-0.19787	0.0613063	-3.22757	0.00124848	0.0218773	3163.16	3875.92	3710.33	3932.29	3828.85	4166.36	4279.49	4334.1	4204.62	Rplp2	NA	ribosomal protein, large P2 [Source:MGI Symbol;Acc:MGI:1914436]
ENSMUSG00000020770	1245.73	0.203819	0.0631909	3.22544	0.00125778	0.0219932	1328.1	1202.3	1355.11	1441.37	1292.72	1161.88	1127.06	1083.53	1219.47	Unk	217331	unkempt family zinc finger [Source:MGI Symbol;Acc:MGI:2442456]
ENSMUSG00000100826	1389.19	0.20302	0.0629472	3.22525	0.00125862	0.0219932	1414.84	1546.56	1412.5	1637.87	1366.67	1331.29	1300.61	1239.34	1253	Snhg14	16353	small nucleolar RNA host gene 14 [Source:MGI Symbol;Acc:MGI:1289201]
ENSMUSG00000102918	856.24	0.381133	0.118217	3.224	0.00126413	0.0220585	771.031	1225.66	901.279	964.836	909.284	635.862	788.845	756.677	752.684	Pcdhgc3	NA	protocadherin gamma subfamily C, 3 [Source:MGI Symbol;Acc:MGI:1935201]
ENSMUSG00000047067	251.316	-0.335689	0.104203	-3.22149	0.00127525	0.0222215	204.323	211.052	210.44	250.622	250.144	283.895	260.319	291.029	300.015	Dusp28	NA	dual specificity phosphatase 28 [Source:MGI Symbol;Acc:MGI:1914696]
ENSMUSG00000040712	464.859	0.266466	0.0827699	3.21936	0.00128476	0.0223246	543.577	504.276	450.639	483.594	530.416	447.115	401.325	389.532	433.257	Camta2	216874	calmodulin binding transcription activator 2 [Source:MGI Symbol;Acc:MGI:2135957]
ENSMUSG00000056476	938.279	0.298152	0.0926106	3.21942	0.0012845	0.0223246	960.898	930.705	1023.5	1123.68	1076.35	758.083	1000.85	770.109	800.334	Med12l	329650	mediator complex subunit 12-like [Source:MGI Symbol;Acc:MGI:2139916]
ENSMUSG00000031748	3390.65	0.204777	0.0636479	3.21734	0.00129384	0.0224511	3529.4	4119.84	3233.12	3568.72	3559.54	3200.97	3091.29	3201.32	3011.62	Gnao1	14681	guanine nucleotide binding protein, alpha O [Source:MGI Symbol;Acc:MGI:95775]
ENSMUSG00000026204	412.696	0.245535	0.0763874	3.21434	0.00130746	0.0226559	438.524	426.429	446.388	428.293	478.378	379.815	353.994	366.249	396.196	Ptprn	19275	protein tyrosine phosphatase, receptor type, N [Source:MGI Symbol;Acc:MGI:102765]
ENSMUSG00000021099	3036.17	-0.180949	0.0563028	-3.21386	0.00130965	0.0226624	2972.33	2551.65	2807.99	3059.23	2941.48	3197.1	3195.81	3415.34	3184.57	Six6	20476	sine oculis-related homeobox 6 [Source:MGI Symbol;Acc:MGI:1341840]
ENSMUSG00000022377	1602.52	0.145678	0.0453553	3.21194	0.00131842	0.0227195	1679.88	1663.33	1603.81	1747.29	1675.24	1496.83	1571.77	1530.37	1454.19	Asap1	13196	ArfGAP with SH3 domain, ankyrin repeat and PH domain1 [Source:MGI Symbol;Acc:MGI:1342335]
ENSMUSG00000033998	746.832	-0.210538	0.0655368	-3.21252	0.00131577	0.0227195	735.371	687.649	732.289	675.385	660.966	861.74	798.706	818.464	750.92	Kcnk1	16525	potassium channel, subfamily K, member 1 [Source:MGI Symbol;Acc:MGI:109322]
ENSMUSG00000034156	1398.93	0.190244	0.059227	3.21212	0.00131758	0.0227195	1369.54	1572.51	1413.56	1560.21	1486.26	1342.89	1273	1224.11	1348.3	Tspoap1	207777	TSPO associated protein 1 [Source:MGI Symbol;Acc:MGI:2450877]
ENSMUSG00000015085	54.9169	0.80167	0.249825	3.20892	0.00133234	0.0228173	99.2703	61.4127	54.2043	60.0081	63.9055	40.9984	32.5399	50.1466	31.7663	Entpd2	12496	ectonucleoside triphosphate diphosphohydrolase 2 [Source:MGI Symbol;Acc:MGI:1096863]
ENSMUSG00000021318	2214.02	0.220309	0.0686592	3.20872	0.00133326	0.0228173	2108.77	2274.86	2439.19	2408.56	2583.61	2199.22	2086.5	1955.72	1869.8	Gli3	14634	GLI-Kruppel family member GLI3 [Source:MGI Symbol;Acc:MGI:95729]
ENSMUSG00000024949	5457.4	0.164244	0.0511861	3.20876	0.00133308	0.0228173	5466.61	5609.31	5541.59	6043.17	5999.81	5449.69	5087.07	4732.59	5186.73	Sf1	22668	splicing factor 1 [Source:MGI Symbol;Acc:MGI:1095403]
ENSMUSG00000028603	1049.48	-0.171569	0.0534481	-3.21	0.00132735	0.0228173	976.318	973.088	950.169	1006.02	1061.74	1081.43	1123.12	1113.97	1159.47	Scp2	20280	sterol carrier protein 2, liver [Source:MGI Symbol;Acc:MGI:98254]
ENSMUSG00000030691	1287.4	0.171459	0.0534343	3.20878	0.001333	0.0228173	1361.83	1452.28	1293.46	1322.53	1342.93	1205.2	1144.81	1264.41	1199.18	Fchsd2	207278	FCH and double SH3 domains 2 [Source:MGI Symbol;Acc:MGI:2448475]
ENSMUSG00000002985	2283.72	-0.340862	0.106255	-3.20795	0.00133687	0.0228478	1586.4	2000.67	1872.7	2370.91	2379.11	2628.54	2831.95	2475.99	2407.18	Apoe	11816	apolipoprotein E [Source:MGI Symbol;Acc:MGI:88057]
ENSMUSG00000027133	593.611	-0.19516	0.0608631	-3.20654	0.00134341	0.0228689	569.599	557.904	554.796	555.369	550.5	625.032	632.062	672.502	624.737	Nop10	NA	NOP10 ribonucleoprotein [Source:MGI Symbol;Acc:MGI:1913431]
ENSMUSG00000035048	797.566	-0.263297	0.0821136	-3.2065	0.00134361	0.0228689	636.101	775.011	805.624	694.211	750.433	826.93	821.385	931.294	937.105	Anapc13	69010	anaphase promoting complex subunit 13 [Source:MGI Symbol;Acc:MGI:1916260]
ENSMUSG00000046179	1171.91	0.196537	0.0612928	3.20653	0.00134346	0.0228689	1297.26	1162.52	1231.82	1231.93	1286.33	1039.66	1154.67	1004.72	1138.29	E2f8	108961	E2F transcription factor 8 [Source:MGI Symbol;Acc:MGI:1922038]
ENSMUSG00000017286	979.181	-0.178171	0.055603	-3.20434	0.0013537	0.0229936	862.591	926.38	984.179	894.238	957.67	1024.96	1037.33	1059.35	1065.94	Glod4	NA	glyoxalase domain containing 4 [Source:MGI Symbol;Acc:MGI:1914451]
ENSMUSG00000026219	5016.67	0.151788	0.0473782	3.20376	0.00135647	0.0229936	5495.53	5240.84	5418.3	4939.49	5149.87	4526.07	5075.23	4702.14	4602.58	Trip12	14897	thyroid hormone receptor interactor 12 [Source:MGI Symbol;Acc:MGI:1309481]
ENSMUSG00000037907	1859.53	0.2405	0.0750607	3.20407	0.00135499	0.0229936	1889.03	2344.93	1946.04	1972.03	1826.78	1805.48	1580.65	1697.82	1673.02	Ankrd13b	268445	ankyrin repeat domain 13b [Source:MGI Symbol;Acc:MGI:2144501]
ENSMUSG00000008307	247.607	0.460503	0.143879	3.20061	0.00137135	0.0231827	194.685	288.034	312.472	292.981	321.353	221.237	210.03	201.482	186.186	1700109H08Rik	77036	RIKEN cDNA 1700109H08 gene [Source:MGI Symbol;Acc:MGI:1924286]
ENSMUSG00000033735	274.026	-0.347013	0.10842	-3.20064	0.00137125	0.0231827	255.404	262.95	237.011	217.676	248.319	295.498	275.11	309.834	364.43	Spr	20751	sepiapterin reductase [Source:MGI Symbol;Acc:MGI:103078]
ENSMUSG00000030446	128.234	-0.499593	0.15616	-3.19923	0.00137794	0.0232625	132.039	110.716	123.288	89.4238	85.816	160.126	164.671	145.962	142.066	Zfp273	NA	zinc finger protein 273 [Source:MGI Symbol;Acc:MGI:3036278]
ENSMUSG00000060923	116.986	-0.479611	0.149988	-3.19766	0.00138548	0.0233582	93.4875	95.1464	119.037	78.8341	110.465	124.542	138.048	145.067	148.243	Acyp2	NA	acylphosphatase 2, muscle type [Source:MGI Symbol;Acc:MGI:1922822]
ENSMUSG00000038827	432.556	0.26108	0.0817263	3.19456	0.00140044	0.0235466	479.967	470.542	481.461	458.885	442.774	391.419	440.767	368.936	358.253	Abitram	230234	actin binding transcription modulator [Source:MGI Symbol;Acc:MGI:2677850]
ENSMUSG00000038831	1260.47	0.200549	0.0627745	3.19476	0.00139947	0.0235466	1316.54	1479.09	1249.89	1406.07	1236.12	1157.24	1168.48	1175.76	1155.06	Ralgps1	241308	Ral GEF with PH domain and SH3 binding motif 1 [Source:MGI Symbol;Acc:MGI:1922008]
ENSMUSG00000033767	1350.6	0.189573	0.0593863	3.19219	0.00141197	0.0237086	1462.07	1524.07	1463.51	1348.42	1343.84	1268.63	1331.18	1170.39	1243.3	Tmem131l	229473	transmembrane 131 like [Source:MGI Symbol;Acc:MGI:2443399]
ENSMUSG00000005871	8062.08	0.193757	0.0608161	3.18594	0.00144284	0.0241942	8819.63	9307.05	8594.03	8082.26	7888.68	7097.36	7910.15	7913.31	6946.23	Apc	11789	APC, WNT signaling pathway regulator [Source:MGI Symbol;Acc:MGI:88039]
ENSMUSG00000082935	261.743	-0.335845	0.105461	-3.18453	0.00144988	0.0242796	214.925	219.702	249.765	231.796	255.622	259.914	290.887	329.535	303.544	Gm7658	NA	predicted gene 7658 [Source:MGI Symbol;Acc:MGI:3648029]
ENSMUSG00000024513	777.445	-0.201354	0.0632455	-3.18369	0.0014541	0.0243176	744.045	698.894	750.357	753.042	700.222	883.399	878.576	796.077	792.392	Mbd2	17191	methyl-CpG binding domain protein 2 [Source:MGI Symbol;Acc:MGI:1333813]
ENSMUSG00000040268	5209.11	0.196945	0.061909	3.1812	0.00146667	0.0244949	5988.02	5337.71	5697.82	5544.27	5044.88	5097.72	5113.69	4655.58	4402.28	Plekha1	101476	pleckstrin homology domain containing, family A (phosphoinositide binding specific) member 1 [Source:MGI Symbol;Acc:MGI:2442213]
ENSMUSG00000031833	687.11	0.225627	0.0709643	3.17944	0.00147558	0.0245979	786.452	698.894	668.519	794.224	724.871	648.239	646.853	603.55	612.383	Mast3	546071	microtubule associated serine/threonine kinase 3 [Source:MGI Symbol;Acc:MGI:2683541]
ENSMUSG00000062353	137.672	-0.427293	0.134402	-3.17921	0.00147678	0.0245979	114.691	113.311	115.848	123.546	129.637	144.655	141.006	171.931	184.421	Gm15772	NA	predicted gene 15772 [Source:MGI Symbol;Acc:MGI:3805541]
ENSMUSG00000037791	1598.38	0.186266	0.0586205	3.17749	0.00148554	0.0246778	1717.47	1678.9	1665.45	1783.77	1603.12	1588.88	1557.97	1369.18	1420.66	Phf12	268448	PHD finger protein 12 [Source:MGI Symbol;Acc:MGI:1924057]
ENSMUSG00000038886	3849.46	0.126182	0.0397079	3.17775	0.00148421	0.0246778	4147.18	3840.45	3891.01	4029.95	4083.56	3765.66	3758.85	3534.44	3594	Man2a2	140481	mannosidase 2, alpha 2 [Source:MGI Symbol;Acc:MGI:2150656]
ENSMUSG00000028167	82.6354	-0.591309	0.186146	-3.17659	0.00149018	0.0247218	73.248	64.8725	62.7069	74.1276	62.0796	72.7141	106.494	108.353	119.124	Bdh2	69772	3-hydroxybutyrate dehydrogenase, type 2 [Source:MGI Symbol;Acc:MGI:1917022]
ENSMUSG00000038695	514.453	0.227903	0.0717542	3.17617	0.00149235	0.024725	582.129	544.064	535.666	534.189	555.978	496.622	425.976	471.02	484.436	Josd2	66124	Josephin domain containing 2 [Source:MGI Symbol;Acc:MGI:1913374]
ENSMUSG00000061559	989.137	-0.185456	0.058426	-3.1742	0.00150249	0.02486	953.187	890.051	996.933	870.705	950.366	1038.88	1026.48	1062.03	1113.58	Wdr61	66317	WD repeat domain 61 [Source:MGI Symbol;Acc:MGI:1917493]
ENSMUSG00000020366	1867.91	0.129605	0.0408399	3.1735	0.00150614	0.0248872	1875.53	1911.58	1933.28	2016.74	1975.59	1783.04	1752.22	1816.02	1747.15	Mapk9	26420	mitogen-activated protein kinase 9 [Source:MGI Symbol;Acc:MGI:1346862]
ENSMUSG00000026989	1923.25	-0.238671	0.0752503	-3.17169	0.00151555	0.0249942	1532.42	1696.2	1981.11	1897.9	1798.48	1963.28	2066.77	2109.74	2263.35	Dapl1	76747	death associated protein-like 1 [Source:MGI Symbol;Acc:MGI:1923997]
ENSMUSG00000034593	3383.31	0.174712	0.0550884	3.17148	0.00151663	0.0249942	3567.95	3955.5	3548.78	3312.21	3430.81	3043.94	3286.53	3220.13	3083.98	Myo5a	17918	myosin VA [Source:MGI Symbol;Acc:MGI:105976]
ENSMUSG00000036989	1067.99	0.189074	0.0596968	3.16724	0.00153895	0.0253287	1215.34	1139.16	1083.02	1171.92	1040.75	1032.7	967.321	978.754	982.99	Trim3	55992	tripartite motif-containing 3 [Source:MGI Symbol;Acc:MGI:1860040]
ENSMUSG00000016252	1485.75	-0.254022	0.080215	-3.16676	0.00154148	0.0253368	1163.29	1400.38	1510.28	1310.76	1458.87	1625.24	1473.17	1685.28	1744.5	Atp5e	67126	ATP synthase, H+ transporting, mitochondrial F1 complex, epsilon subunit [Source:MGI Symbol;Acc:MGI:1855697]
ENSMUSG00000035314	941.315	0.189943	0.0599988	3.16577	0.00154672	0.0253894	990.775	980.873	1026.69	1015.43	969.538	939.869	798.706	856.97	892.985	Gdpd5	233552	glycerophosphodiester phosphodiesterase domain containing 5 [Source:MGI Symbol;Acc:MGI:2686926]
ENSMUSG00000023277	223.544	-0.304131	0.0961627	-3.16267	0.00156329	0.0256277	211.07	194.618	197.686	205.91	203.585	257.594	237.64	238.196	265.601	Twf2	23999	twinfilin actin binding protein 2 [Source:MGI Symbol;Acc:MGI:1346078]
ENSMUSG00000047888	2513.96	0.201775	0.0638149	3.16188	0.00156752	0.0256632	2874.02	2584.52	2718.72	2494.45	2669.42	2049.92	2336.95	2441.96	2455.71	Tnrc6b	213988	trinucleotide repeat containing 6b [Source:MGI Symbol;Acc:MGI:2443730]
ENSMUSG00000025555	1234.5	0.215127	0.0680677	3.16049	0.00157503	0.0257186	1178.71	1475.63	1243.51	1344.89	1332.89	1089.16	1147.77	1160.54	1137.41	Farp1	223254	FERM, RhoGEF (Arhgef) and pleckstrin domain protein 1 (chondrocyte-derived) [Source:MGI Symbol;Acc:MGI:2446173]
ENSMUSG00000028649	8813.89	0.172749	0.0546549	3.16071	0.00157383	0.0257186	9515.49	9758.56	9514.44	8310.53	9291.86	7603.27	8566.86	8474.78	8289.23	Macf1	11426	microtubule-actin crosslinking factor 1 [Source:MGI Symbol;Acc:MGI:108559]
ENSMUSG00000030630	212.618	0.376346	0.119191	3.15751	0.00159124	0.0258498	254.44	243.056	229.571	224.736	231.886	205.766	205.1	152.231	166.773	Fah	14085	fumarylacetoacetate hydrolase [Source:MGI Symbol;Acc:MGI:95482]
ENSMUSG00000034111	584.622	0.195472	0.0619022	3.15775	0.00158989	0.0258498	603.332	634.886	604.749	629.496	624.448	537.62	551.206	558.777	517.084	Tmed8	382620	transmembrane p24 trafficking protein 8 [Source:MGI Symbol;Acc:MGI:1923480]
ENSMUSG00000035342	1484.31	0.182356	0.0577386	3.15831	0.00158688	0.0258498	1646.15	1476.5	1645.26	1590.8	1478.96	1419.47	1376.53	1285.01	1440.07	Lzts2	226154	leucine zipper, putative tumor suppressor 2 [Source:MGI Symbol;Acc:MGI:2385095]
ENSMUSG00000038510	432.614	-0.230605	0.0730344	-3.15749	0.00159136	0.0258498	426.959	385.775	406	398.877	391.649	491.981	469.363	479.079	443.846	Rpf2	67239	ribosome production factor 2 homolog [Source:MGI Symbol;Acc:MGI:1914489]
ENSMUSG00000023908	611.835	0.289385	0.0916999	3.15579	0.00160067	0.0259671	572.491	606.342	663.205	757.749	730.349	577.072	526.554	527.435	545.321	Pkmyt1	268930	protein kinase, membrane associated tyrosine/threonine 1 [Source:MGI Symbol;Acc:MGI:2137630]
ENSMUSG00000020386	759.706	-0.211339	0.0670492	-3.152	0.00162157	0.026272	721.878	706.678	716.346	703.624	701.135	772.781	757.291	898.162	859.454	Sar1b	66397	secretion associated Ras related GTPase 1B [Source:MGI Symbol;Acc:MGI:1913647]
ENSMUSG00000106858	87.8941	0.639304	0.202862	3.15142	0.00162477	0.0262896	75.1756	97.7413	104.157	111.78	133.289	50.281	71.9821	71.638	75.0037	Gm43844	NA	predicted gene 43844 [Source:MGI Symbol;Acc:MGI:5663981]
ENSMUSG00000004347	455.957	-0.277874	0.0881982	-3.15057	0.00162953	0.0263325	438.524	363.286	459.142	396.524	425.428	457.171	522.61	522.958	517.967	Pde1c	18575	phosphodiesterase 1C [Source:MGI Symbol;Acc:MGI:108413]
ENSMUSG00000034994	30787.9	-0.117492	0.0373407	-3.14648	0.00165247	0.0266686	29294.4	30236.7	27934.3	29656.9	31219.7	31626.8	31926.5	31912.9	33283.1	Eef2	13629	eukaryotic translation elongation factor 2 [Source:MGI Symbol;Acc:MGI:95288]
ENSMUSG00000009207	818.943	0.194572	0.0618473	3.14601	0.00165517	0.0266775	835.605	900.431	912.97	882.472	806.122	738.745	799.692	762.945	731.507	Lnpk	69605	lunapark, ER junction formation factor [Source:MGI Symbol;Acc:MGI:1918115]
ENSMUSG00000022983	1078.82	0.238796	0.0760284	3.14087	0.00168445	0.0271144	1269.31	1114.08	1169.11	1110.74	1122.91	1050.49	1076.77	926.817	869.161	Scaf4	224432	SR-related CTD-associated factor 4 [Source:MGI Symbol;Acc:MGI:2146350]
ENSMUSG00000057858	654.032	-0.27887	0.0888084	-3.14013	0.00168873	0.0271483	505.989	601.152	687.65	594.198	598.886	691.558	676.435	748.617	781.804	Fam204a	76539	family with sequence similarity 204, member A [Source:MGI Symbol;Acc:MGI:1289174]
ENSMUSG00000022521	1679.66	0.175353	0.0558577	3.13929	0.00169359	0.0271491	1718.44	1847.57	1850.38	1630.81	1799.4	1640.71	1627.98	1493.65	1508.02	Crebbp	12914	CREB binding protein [Source:MGI Symbol;Acc:MGI:1098280]
ENSMUSG00000025927	4768.28	0.27386	0.0872384	3.13921	0.00169403	0.0271491	5993.8	4605.09	4946.4	5443.08	4838.56	4638.23	4721.24	3932.03	3796.07	Tfap2b	21419	transcription factor AP-2 beta [Source:MGI Symbol;Acc:MGI:104672]
ENSMUSG00000027508	1452.24	0.197873	0.0630372	3.13899	0.00169532	0.0271491	1667.36	1520.61	1550.67	1502.55	1457.05	1327.42	1471.2	1345	1228.3	Pag1	94212	phosphoprotein associated with glycosphingolipid microdomains 1 [Source:MGI Symbol;Acc:MGI:2443160]
ENSMUSG00000003970	8990.61	-0.136117	0.0433755	-3.1381	0.00170046	0.0271827	7965.72	8479.27	8704.56	8916.49	8996.98	9697.28	9136.8	9308.46	9709.89	Rpl8	26961	ribosomal protein L8 [Source:MGI Symbol;Acc:MGI:1350927]
ENSMUSG00000030647	1251.65	-0.244489	0.0779155	-3.13787	0.00170178	0.0271827	1041.86	1205.76	1193.56	1133.09	1209.64	1349.08	1178.34	1456.94	1496.54	Ndufc2	68197	NADH:ubiquinone oxidoreductase subunit C2 [Source:MGI Symbol;Acc:MGI:1344370]
ENSMUSG00000020231	853.493	0.187788	0.0599151	3.13424	0.00172302	0.0273843	945.477	915.135	892.776	833.053	923.891	799.855	796.734	746.826	827.688	Dip2a	64451	disco interacting protein 2 homolog A [Source:MGI Symbol;Acc:MGI:2385920]
ENSMUSG00000024548	785.362	0.297212	0.0947964	3.13527	0.00171694	0.0273843	718.023	1007.69	797.121	916.594	840.814	682.275	724.752	728.021	652.974	Setbp1	240427	SET binding protein 1 [Source:MGI Symbol;Acc:MGI:1933199]
ENSMUSG00000030342	411.515	0.310554	0.0990853	3.13421	0.00172319	0.0273843	437.56	497.356	442.137	409.467	464.684	372.853	306.664	358.19	414.726	Cd9	12527	CD9 antigen [Source:MGI Symbol;Acc:MGI:88348]
ENSMUSG00000046598	1119.46	0.253268	0.0808019	3.13444	0.00172185	0.0273843	1111.25	1396.06	1246.7	1154.27	1120.17	1012.58	912.102	1073.67	1048.29	Bdh1	71911	3-hydroxybutyrate dehydrogenase, type 1 [Source:MGI Symbol;Acc:MGI:1919161]
ENSMUSG00000000441	2740	0.125157	0.0399916	3.12957	0.00175064	0.0277496	2761.26	2911.48	2758.04	2974.52	2821.88	2677.27	2637.7	2532.4	2585.42	Raf1	110157	v-raf-leukemia viral oncogene 1 [Source:MGI Symbol;Acc:MGI:97847]
ENSMUSG00000040385	4709.03	-0.132207	0.042242	-3.12975	0.00174954	0.0277496	4526.92	4384.52	4363.97	4465.31	4841.3	5028.88	4767.58	4891.09	5111.72	Ppp1ca	19045	protein phosphatase 1 catalytic subunit alpha [Source:MGI Symbol;Acc:MGI:103016]
ENSMUSG00000079487	1436.83	0.198342	0.0633937	3.12873	0.00175563	0.0277934	1659.64	1432.39	1593.18	1462.55	1471.65	1369.97	1396.26	1217.85	1328.01	Med12	NA	mediator complex subunit 12 [Source:MGI Symbol;Acc:MGI:1926212]
ENSMUSG00000027566	2300.77	-0.20942	0.0669616	-3.12746	0.00176324	0.0278785	2044.2	2092.36	2161.79	2073.22	2385.5	2470.73	2224.54	2532.4	2722.19	Psma7	26444	proteasome (prosome, macropain) subunit, alpha type 7 [Source:MGI Symbol;Acc:MGI:1347070]
ENSMUSG00000029104	1850.56	0.165012	0.052785	3.12612	0.00177129	0.0278995	2068.29	1944.45	1907.78	1827.3	1968.29	1684.8	1824.2	1636.93	1793.03	Htt	15194	huntingtin [Source:MGI Symbol;Acc:MGI:96067]
ENSMUSG00000070639	1923.66	0.158305	0.050634	3.12646	0.00176922	0.0278995	1908.3	2139.93	1964.11	1944.97	2123.49	1770.67	1789.69	1880.5	1791.27	Lrrc8b	433926	leucine rich repeat containing 8 family, member B [Source:MGI Symbol;Acc:MGI:2141353]
ENSMUSG00000092349	115.986	-0.551109	0.176278	-3.12637	0.0017698	0.0278995	107.944	89.0916	88.2148	89.4238	105.901	133.051	100.578	157.604	172.067	Smim40	474160	small integral membrane protein 40 [Source:MGI Symbol;Acc:MGI:3054967]
ENSMUSG00000033965	1530.62	0.213213	0.0682432	3.12432	0.00178219	0.0280357	1649.04	1591.54	1546.42	1682.58	1682.54	1571.86	1471.2	1289.48	1290.95	Slc16a2	20502	solute carrier family 16 (monocarboxylic acid transporters), member 2 [Source:MGI Symbol;Acc:MGI:1203732]
ENSMUSG00000025507	422.877	0.331929	0.106358	3.12088	0.00180313	0.0283294	377.805	425.564	487.838	501.244	534.98	352.741	366.813	365.354	393.549	Pidd1	57913	p53 induced death domain protein 1 [Source:MGI Symbol;Acc:MGI:1889507]
ENSMUSG00000049076	1360.58	0.147772	0.0473744	3.11925	0.00181314	0.0284149	1398.46	1421.14	1446.51	1404.89	1439.7	1335.93	1329.2	1239.34	1230.06	Acap2	78618	ArfGAP with coiled-coil, ankyrin repeat and PH domains 2 [Source:MGI Symbol;Acc:MGI:1925868]
ENSMUSG00000055670	1383.08	0.179423	0.0575176	3.11944	0.00181195	0.0284149	1536.28	1498.99	1449.7	1361.36	1444.26	1182.76	1322.3	1298.44	1353.6	Zzef1	195018	zinc finger, ZZ-type with EF hand domain 1 [Source:MGI Symbol;Acc:MGI:2444286]
ENSMUSG00000018286	2470.94	-0.178686	0.0573163	-3.11755	0.00182364	0.0285276	2219.61	2334.55	2437.07	2280.31	2400.11	2592.95	2381.33	2772.39	2820.14	Psmb6	19175	proteasome (prosome, macropain) subunit, beta type 6 [Source:MGI Symbol;Acc:MGI:104880]
ENSMUSG00000024232	213.896	-0.439761	0.141078	-3.11715	0.00182607	0.0285276	200.468	167.804	182.806	174.141	197.194	189.521	254.403	253.419	305.309	Bambi	68010	BMP and activin membrane-bound inhibitor [Source:MGI Symbol;Acc:MGI:1915260]
ENSMUSG00000036398	635.494	-0.189088	0.0606642	-3.11697	0.0018272	0.0285276	608.151	582.123	609.001	607.14	587.018	706.255	654.742	660.861	704.153	Ppp1r11	76497	protein phosphatase 1, regulatory inhibitor subunit 11 [Source:MGI Symbol;Acc:MGI:1923747]
ENSMUSG00000061410	2534.98	0.134035	0.0430287	3.11501	0.00183939	0.028682	2716.92	2769.63	2634.75	2541.52	2528.83	2324.53	2416.82	2444.65	2437.18	Zcchc14	142682	zinc finger, CCHC domain containing 14 [Source:MGI Symbol;Acc:MGI:2159407]
ENSMUSG00000014769	2161.98	-0.157314	0.050556	-3.11168	0.00186028	0.0289548	1961.31	2073.33	2176.67	2072.04	2002.98	2321.44	2119.04	2386.44	2344.53	Psmb1	NA	proteasome (prosome, macropain) subunit, beta type 1 [Source:MGI Symbol;Acc:MGI:104884]
ENSMUSG00000034345	1368.58	-0.191066	0.0614068	-3.11148	0.00186153	0.0289548	1175.82	1399.52	1309.4	1284.88	1267.16	1406.32	1407.1	1556.34	1510.66	Gtf2h5	66467	general transcription factor IIH, polypeptide 5 [Source:MGI Symbol;Acc:MGI:107227]
ENSMUSG00000021072	2315.85	-0.127183	0.0408926	-3.11017	0.00186977	0.0290467	2189.73	2203.07	2305.27	2286.19	2142.66	2484.66	2475	2411.51	2344.53	Tmx1	NA	thioredoxin-related transmembrane protein 1 [Source:MGI Symbol;Acc:MGI:1919986]
ENSMUSG00000028684	673.174	-0.190398	0.0612315	-3.10948	0.00187416	0.0290787	650.558	624.506	661.079	613.024	618.971	724.047	677.421	749.513	739.448	Urod	22275	uroporphyrinogen decarboxylase [Source:MGI Symbol;Acc:MGI:98916]
ENSMUSG00000004187	421.513	0.355478	0.11441	3.10706	0.00188958	0.0292731	436.596	529.36	438.948	516.54	413.56	363.571	312.58	347.444	435.022	Kifc2	16581	kinesin family member C2 [Source:MGI Symbol;Acc:MGI:109187]
ENSMUSG00000050910	668.218	0.189697	0.0610593	3.10678	0.00189139	0.0292731	717.059	715.328	662.142	696.564	743.13	634.315	596.564	622.355	626.502	Cdr2l	237988	cerebellar degeneration-related protein 2-like [Source:MGI Symbol;Acc:MGI:2684867]
ENSMUSG00000019718	224.47	-0.441841	0.142375	-3.10335	0.00191342	0.0295406	186.011	194.618	220.005	181.201	186.239	297.045	318.496	230.137	206.481	L3hypdh	67217	L-3-hydroxyproline dehydratase (trans-) [Source:MGI Symbol;Acc:MGI:1914467]
ENSMUSG00000025366	503.553	0.259881	0.0837338	3.10365	0.00191147	0.0295406	543.577	495.626	584.556	560.075	534.067	474.189	494.014	399.382	446.493	Esyt1	23943	extended synaptotagmin-like protein 1 [Source:MGI Symbol;Acc:MGI:1344426]
ENSMUSG00000025868	985.378	-0.194337	0.0626572	-3.10159	0.00192487	0.0296806	931.02	909.946	891.713	907.181	990.535	1068.28	956.475	1101.43	1111.82	Higd2a	67044	HIG1 domain family, member 2A [Source:MGI Symbol;Acc:MGI:1914294]
ENSMUSG00000001521	995.251	0.217862	0.0702681	3.10044	0.00193232	0.0297586	1054.39	934.165	1039.45	1155.45	1125.65	951.472	934.782	890.102	871.808	Tulp3	22158	tubby-like protein 3 [Source:MGI Symbol;Acc:MGI:1329045]
ENSMUSG00000021234	196.869	-0.344233	0.111084	-3.09886	0.00194265	0.0297705	201.432	152.234	172.178	170.611	182.587	224.331	234.681	215.81	217.952	Fam161b	217705	family with sequence similarity 161, member B [Source:MGI Symbol;Acc:MGI:2443027]
ENSMUSG00000024498	2682.75	0.173327	0.0559159	3.09978	0.00193665	0.0297705	2657.17	2928.78	2855.82	2925.1	2759.81	2728.33	2544.03	2433.01	2312.76	Tcerg1	56070	transcription elongation regulator 1 (CA150) [Source:MGI Symbol;Acc:MGI:1926421]
ENSMUSG00000035168	1094.67	0.220826	0.0712463	3.09947	0.00193868	0.0297705	1239.43	1024.99	1138.29	1158.98	1280.85	1008.72	970.28	970.695	1059.76	Tanc1	66860	tetratricopeptide repeat, ankyrin repeat and coiled-coil containing 1 [Source:MGI Symbol;Acc:MGI:1914110]
ENSMUSG00000066553	87.0086	1.14397	0.369139	3.09902	0.00194161	0.0297705	148.424	153.964	166.864	58.8314	46.5597	46.4133	63.1076	66.2652	32.6487	Gm6969	NA	predicted pseudogene 6969 [Source:MGI Symbol;Acc:MGI:3645320]
ENSMUSG00000022054	3066.51	0.242879	0.0783949	3.09815	0.00194731	0.0298053	3294.23	3656.22	3280.95	3411.05	2823.71	2548.86	2694.89	2746.42	3142.21	Nefm	18040	neurofilament, medium polypeptide [Source:MGI Symbol;Acc:MGI:97314]
ENSMUSG00000005374	1051.03	0.223236	0.0720988	3.09625	0.00195988	0.0299507	1281.84	1108.02	1161.67	1000.13	1059.92	970.037	978.168	942.04	957.4	Tbl2	27368	transducin (beta)-like 2 [Source:MGI Symbol;Acc:MGI:1351652]
ENSMUSG00000026097	650.135	-0.185467	0.0599056	-3.09598	0.00196162	0.0299507	639.956	592.503	591.995	627.143	612.58	676.86	685.309	711.007	713.859	Ormdl1	227102	ORM1-like 1 (S. cerevisiae) [Source:MGI Symbol;Acc:MGI:2181669]
ENSMUSG00000030751	2035.67	-0.132731	0.0428928	-3.09449	0.0019715	0.0300281	1865.9	1946.18	2007.68	2048.51	1895.25	2104.07	2115.09	2149.14	2189.23	Psma1	26440	proteasome (prosome, macropain) subunit, alpha type 1 [Source:MGI Symbol;Acc:MGI:1347005]
ENSMUSG00000042043	988.368	-0.256765	0.0829671	-3.09479	0.00196955	0.0300281	778.742	958.384	1043.7	896.591	870.941	1047.39	1072.83	1178.45	1048.29	Tbca	21371	tubulin cofactor A [Source:MGI Symbol;Acc:MGI:107549]
ENSMUSG00000025651	2406.19	-0.13703	0.0442932	-3.0937	0.00197678	0.030035	2253.34	2279.19	2194.74	2339.14	2454.88	2571.3	2439.5	2567.33	2556.3	Uqcrc1	22273	ubiquinol-cytochrome c reductase core protein 1 [Source:MGI Symbol;Acc:MGI:107876]
ENSMUSG00000027646	2351.34	0.156646	0.0506311	3.09387	0.00197562	0.030035	2661.99	2459.97	2546.54	2341.49	2310.64	2263.42	2161.44	2189.44	2227.17	Src	20779	Rous sarcoma oncogene [Source:MGI Symbol;Acc:MGI:98397]
ENSMUSG00000015291	5110.95	0.126062	0.040765	3.09241	0.00198541	0.0301293	5080.13	5584.23	5051.62	5506.62	5317.85	4837.04	4956.91	4782.73	4881.42	Gdi1	14567	guanosine diphosphate (GDP) dissociation inhibitor 1 [Source:MGI Symbol;Acc:MGI:99846]
ENSMUSG00000002221	1481.26	0.172535	0.055824	3.09069	0.00199692	0.0302672	1428.34	1498.99	1647.38	1624.92	1599.46	1368.42	1362.73	1353.96	1447.13	Paxip1	55982	PAX interacting (with transcription-activation domain) protein 1 [Source:MGI Symbol;Acc:MGI:1890430]
ENSMUSG00000020171	1510.71	-0.184936	0.0598515	-3.08992	0.0020021	0.0303088	1449.54	1302.64	1521.97	1450.78	1397.7	1530.09	1567.83	1735.43	1640.38	Yeats4	64050	YEATS domain containing 4 [Source:MGI Symbol;Acc:MGI:1927224]
ENSMUSG00000030057	7596.78	-0.19827	0.0641813	-3.08921	0.00200689	0.0303195	6285.83	6988.94	7559.9	7463.36	7353.7	7821.41	7549.25	8687.01	8661.61	Cnbp	12785	cellular nucleic acid binding protein [Source:MGI Symbol;Acc:MGI:88431]
ENSMUSG00000042737	264.647	-0.312065	0.101021	-3.0891	0.00200767	0.0303195	235.165	237.001	221.068	257.682	244.667	286.215	270.179	289.238	340.605	Dpm3	68563	dolichyl-phosphate mannosyltransferase polypeptide 3 [Source:MGI Symbol;Acc:MGI:1915813]
ENSMUSG00000010054	646.996	-0.208309	0.0675101	-3.0856	0.00203143	0.0305297	644.775	606.342	571.802	589.491	612.58	678.407	678.407	678.77	762.391	Tusc2	80385	tumor suppressor 2, mitochondrial calcium regulator [Source:MGI Symbol;Acc:MGI:1931086]
ENSMUSG00000017418	1745.1	0.14517	0.0470557	3.08508	0.002035	0.0305297	1754.1	1744.64	1898.21	1835.54	1881.56	1629.88	1661.51	1712.15	1588.31	Arl5b	75869	ADP-ribosylation factor-like 5B [Source:MGI Symbol;Acc:MGI:1923119]
ENSMUSG00000020621	287.165	-0.278289	0.0902105	-3.08489	0.00203629	0.0305297	265.042	243.921	268.896	285.921	249.231	314.837	333.287	327.744	295.603	Rdh14	105014	retinol dehydrogenase 14 (all-trans and 9-cis) [Source:MGI Symbol;Acc:MGI:1920402]
ENSMUSG00000022883	1156.73	0.243527	0.0788985	3.08659	0.00202466	0.0305297	1292.44	1383.95	1110.66	1191.92	1230.64	930.586	1037.33	1129.19	1103.88	Robo1	19876	roundabout guidance receptor 1 [Source:MGI Symbol;Acc:MGI:1274781]
ENSMUSG00000028998	829.066	-0.303206	0.0982563	-3.08587	0.00202956	0.0305297	628.391	807.014	900.216	693.034	725.784	854.004	922.949	993.978	936.223	Tomm7	66169	translocase of outer mitochondrial membrane 7 [Source:MGI Symbol;Acc:MGI:1913419]
ENSMUSG00000053293	1984.21	0.153796	0.0498428	3.08563	0.00203124	0.0305297	2213.82	1970.4	2033.19	2084.99	2086.97	1959.41	1904.08	1782.89	1822.15	Pom121	107939	nuclear pore membrane protein 121 [Source:MGI Symbol;Acc:MGI:2137624]
ENSMUSG00000018554	105.251	0.45361	0.14717	3.08223	0.00205457	0.0307668	108.908	114.176	125.414	135.312	115.03	88.9588	81.8427	77.9063	99.7108	Ybx2	53422	Y box protein 2 [Source:MGI Symbol;Acc:MGI:1096372]
ENSMUSG00000104342	95.2081	0.620853	0.201826	3.07618	0.00209669	0.0313597	78.0669	90.8216	117.974	141.195	136.027	75.0348	80.8566	68.9516	67.9445	Gm36401	NA	predicted gene, 36401 [Source:MGI Symbol;Acc:MGI:5595560]
ENSMUSG00000064351	66084.5	-0.171125	0.0556819	-3.07326	0.00211737	0.0316311	58566.6	66661.3	63243.6	63020.2	61416.8	68086.7	64755.3	77656.5	71353.2	mt-Co1	17708	mitochondrially encoded cytochrome c oxidase I [Source:MGI Symbol;Acc:MGI:102504]
ENSMUSG00000007892	7305.62	-0.223226	0.0726644	-3.07201	0.00212621	0.0316871	5729.73	7075.43	6730.89	6820.92	7641.27	7491.88	7653.77	8336.87	8269.82	Rplp1	56040	ribosomal protein, large, P1 [Source:MGI Symbol;Acc:MGI:1927099]
ENSMUSG00000029093	2731.34	0.182342	0.0593526	3.07219	0.00212495	0.0316871	3142.92	2614.8	2872.83	2789.79	2995.34	2395.7	2684.05	2514.49	2572.19	Sorcs2	81840	sortilin-related VPS10 domain containing receptor 2 [Source:MGI Symbol;Acc:MGI:1932289]
ENSMUSG00000019230	758.712	0.289246	0.0941866	3.07099	0.00213352	0.0317132	976.318	754.251	823.692	809.521	763.214	708.576	721.793	691.307	579.735	Lhx9	16876	LIM homeobox protein 9 [Source:MGI Symbol;Acc:MGI:1316721]
ENSMUSG00000022195	573.134	0.203876	0.0663852	3.0711	0.0021327	0.0317132	657.304	571.743	614.315	603.611	597.973	543.809	529.512	515.794	524.144	6030458C11Rik	77877	RIKEN cDNA 6030458C11 gene [Source:MGI Symbol;Acc:MGI:1925127]
ENSMUSG00000052727	16479.3	0.202464	0.0659341	3.0707	0.0021356	0.0317132	18109.6	20121.7	15942.4	16376.3	16933.1	14431.4	15775.9	15790.8	14832.2	Map1b	17755	microtubule-associated protein 1B [Source:MGI Symbol;Acc:MGI:1306778]
ENSMUSG00000024462	3108.39	0.169455	0.0551991	3.06989	0.00214135	0.031723	3155.45	3629.4	3192.74	3226.32	3140.5	2760.04	2873.37	3086.7	2911.03	Gabbr1	54393	gamma-aminobutyric acid (GABA) B receptor, 1 [Source:MGI Symbol;Acc:MGI:1860139]
ENSMUSG00000026220	206.506	0.339782	0.110676	3.07007	0.00214011	0.031723	225.527	252.57	243.388	191.79	224.582	179.465	170.588	183.572	187.068	Slc16a14	71781	solute carrier family 16 (monocarboxylic acid transporters), member 14 [Source:MGI Symbol;Acc:MGI:1919031]
ENSMUSG00000002395	912.011	-0.294119	0.0958851	-3.06741	0.00215921	0.0318556	832.714	819.124	801.373	784.811	905.632	1001.75	814.483	1078.15	1170.06	Use1	67023	unconventional SNARE in the ER 1 homolog (S. cerevisiae) [Source:MGI Symbol;Acc:MGI:1914273]
ENSMUSG00000048970	258.082	-0.336858	0.109807	-3.06774	0.00215683	0.0318556	262.151	216.242	261.456	195.32	220.018	307.875	297.789	288.343	273.543	C1galt1c1	59048	C1GALT1-specific chaperone 1 [Source:MGI Symbol;Acc:MGI:1913493]
ENSMUSG00000059278	304.014	-0.261481	0.0852498	-3.06723	0.00216052	0.0318556	269.861	277.655	291.215	274.155	283.923	326.44	317.51	365.354	330.016	Naa38	NA	N(alpha)-acetyltransferase 38, NatC auxiliary subunit [Source:MGI Symbol;Acc:MGI:1925554]
ENSMUSG00000084319	381.376	-0.394406	0.128549	-3.06814	0.00215395	0.0318556	270.825	393.56	363.487	345.929	298.53	356.609	474.293	482.661	446.493	Tpt1-ps3	NA	tumor protein, translationally-controlled, pseudogene 3 [Source:MGI Symbol;Acc:MGI:2664997]
ENSMUSG00000029110	2218.01	0.135955	0.0443356	3.06648	0.00216592	0.0318974	2148.29	2382.12	2379.67	2315.61	2326.16	2133.46	2136.78	2038.1	2101.87	Rnf4	19822	ring finger protein 4 [Source:MGI Symbol;Acc:MGI:1201691]
ENSMUSG00000041444	2570.04	0.180448	0.0588889	3.06422	0.00218241	0.0321023	2474.05	2833.63	2752.73	2613.29	2882.14	2217.78	2376.4	2542.25	2438.06	Arhgap32	330914	Rho GTPase activating protein 32 [Source:MGI Symbol;Acc:MGI:2450166]
ENSMUSG00000083097	91.2676	-0.462948	0.151153	-3.06278	0.00219292	0.0322189	82.8859	78.712	76.5236	75.3042	77.5996	118.354	90.7172	109.248	112.064	Gm14494	NA	predicted gene 14494 [Source:MGI Symbol;Acc:MGI:3704210]
ENSMUSG00000031065	2660.97	0.118392	0.0386848	3.06042	0.00221025	0.0324023	2881.73	2713.4	2649.63	2776.84	2767.11	2594.5	2515.43	2486.73	2563.36	Cdk16	18555	cyclin-dependent kinase 16 [Source:MGI Symbol;Acc:MGI:97516]
ENSMUSG00000031960	2902.03	0.126314	0.0412772	3.06013	0.00221239	0.0324023	3081.23	3052.47	3072.64	2915.69	2948.78	2849.77	2852.66	2622.85	2722.19	Aars	234734	alanyl-tRNA synthetase [Source:MGI Symbol;Acc:MGI:2384560]
ENSMUSG00000098318	440.764	-0.236883	0.0774122	-3.06002	0.00221321	0.0324023	401.9	375.396	441.074	409.467	416.299	515.961	457.53	469.229	480.024	Lockd	NA	lncRNA downstream of Cdkn1b [Source:MGI Symbol;Acc:MGI:1915081]
ENSMUSG00000059022	174.628	0.412659	0.134942	3.05805	0.00222783	0.0325781	169.627	225.756	177.492	216.5	192.629	150.843	135.09	132.53	171.185	Kcp	333088	kielin/chordin-like protein [Source:MGI Symbol;Acc:MGI:2141640]
ENSMUSG00000033105	1708.64	0.135395	0.0443029	3.05612	0.00224219	0.0327113	1847.58	1800.86	1812.12	1681.4	1752.84	1581.15	1608.26	1660.21	1633.32	Lss	16987	lanosterol synthase [Source:MGI Symbol;Acc:MGI:1336155]
ENSMUSG00000064363	19292.1	-0.172467	0.0564296	-3.05633	0.00224064	0.0327113	17589.2	18877.9	17726.9	19362.6	17753.9	20882.9	18269.7	22121.8	21044.3	mt-Nd4	17719	mitochondrially encoded NADH dehydrogenase 4 [Source:MGI Symbol;Acc:MGI:102498]
ENSMUSG00000001632	1642.55	0.141648	0.0463622	3.05525	0.00224876	0.0327361	1624.95	1666.79	1752.6	1727.29	1798.48	1584.24	1565.86	1508.88	1553.9	Brpf1	78783	bromodomain and PHD finger containing, 1 [Source:MGI Symbol;Acc:MGI:1926033]
ENSMUSG00000026121	1324.18	0.167474	0.054816	3.05519	0.00224915	0.0327361	1333.88	1454.01	1449.7	1357.83	1365.75	1302.67	1195.1	1172.18	1286.53	Sema4c	20353	sema domain, immunoglobulin domain (Ig), transmembrane domain (TM) and short cytoplasmic domain, (semaphorin) 4C [Source:MGI Symbol;Acc:MGI:109252]
ENSMUSG00000035403	928.155	-0.293893	0.0962342	-3.05393	0.00225865	0.032836	913.672	690.244	793.933	909.534	910.197	899.644	1064.94	1063.82	1107.41	Crb2	241324	crumbs family member 2 [Source:MGI Symbol;Acc:MGI:2679260]
ENSMUSG00000022791	1723.71	0.138778	0.0454598	3.05277	0.00226741	0.0329058	1823.49	1786.16	1815.31	1847.31	1715.41	1663.14	1610.23	1556.34	1695.97	Tnk2	51789	tyrosine kinase, non-receptor, 2 [Source:MGI Symbol;Acc:MGI:1858308]
ENSMUSG00000034160	5215.18	0.189164	0.0619681	3.05259	0.00226873	0.0329058	5896.46	5302.25	5305.64	5616.05	5462.1	5133.31	5299.07	4462.15	4459.63	Ogt	108155	O-linked N-acetylglucosamine (GlcNAc) transferase (UDP-N-acetylglucosamine:polypeptide-N-acetylglucosaminyl transferase) [Source:MGI Symbol;Acc:MGI:1339639]
ENSMUSG00000071658	1409.74	0.204471	0.0669947	3.05205	0.00227288	0.0329277	1402.31	1692.74	1391.24	1542.56	1459.78	1372.29	1257.22	1267.99	1301.54	Gng3	14704	guanine nucleotide binding protein (G protein), gamma 3 [Source:MGI Symbol;Acc:MGI:102704]
ENSMUSG00000024780	778.198	0.248835	0.0816054	3.04925	0.00229414	0.0330758	914.636	819.989	877.896	775.398	796.08	612.655	708.975	774.586	723.565	Cdc37l1	67072	cell division cycle 37-like 1 [Source:MGI Symbol;Acc:MGI:1914322]
ENSMUSG00000028468	1207.61	0.185862	0.0609592	3.04896	0.00229638	0.0330758	1285.69	1262.85	1224.38	1348.42	1258.94	1110.82	1237.5	1031.59	1108.29	Rgp1	242406	RAB6A GEF compex partner 1 [Source:MGI Symbol;Acc:MGI:1915956]
ENSMUSG00000030621	220.212	0.302308	0.0991199	3.04993	0.00228898	0.0330758	255.404	223.162	233.822	245.915	244.667	202.671	184.393	187.154	204.716	Me3	109264	malic enzyme 3, NADP(+)-dependent, mitochondrial [Source:MGI Symbol;Acc:MGI:1916679]
ENSMUSG00000031431	629.632	-0.225062	0.0737913	-3.04999	0.00228851	0.0330758	591.767	511.196	599.435	589.491	638.142	707.802	664.602	668.92	695.329	Tsc22d3	14605	TSC22 domain family, member 3 [Source:MGI Symbol;Acc:MGI:1196284]
ENSMUSG00000032178	4137.67	0.0962279	0.0315547	3.04956	0.00229175	0.0330758	4167.42	4249.58	4306.58	4235.86	4338.27	3949.77	4040.86	3887.26	4063.44	Ilf3	16201	interleukin enhancer binding factor 3 [Source:MGI Symbol;Acc:MGI:1339973]
ENSMUSG00000059674	386.445	0.26442	0.0867508	3.04805	0.00230334	0.0331378	442.379	404.805	434.697	418.88	387.085	355.835	378.646	306.253	349.429	Cdh24	239096	cadherin-like 24 [Source:MGI Symbol;Acc:MGI:1928330]
ENSMUSG00000024151	2114.7	-0.162669	0.0533778	-3.04751	0.00230746	0.0331588	1916.98	1964.34	2026.81	2146.17	1989.29	2151.26	2123.97	2398.98	2314.53	Msh2	17685	mutS homolog 2 [Source:MGI Symbol;Acc:MGI:101816]
ENSMUSG00000011256	525.672	0.209021	0.0686048	3.04674	0.00231338	0.0331673	559.961	599.422	526.1	578.901	531.329	485.019	484.154	479.079	487.083	Adam19	11492	a disintegrin and metallopeptidase domain 19 (meltrin beta) [Source:MGI Symbol;Acc:MGI:105377]
ENSMUSG00000042388	1890.7	0.187516	0.0615445	3.04684	0.00231263	0.0331673	2146.36	1966.07	1914.15	2050.86	1920.82	1909.13	1584.59	1751.55	1772.74	Dlgap3	242667	DLG associated protein 3 [Source:MGI Symbol;Acc:MGI:3039563]
ENSMUSG00000032314	854.701	-0.207095	0.0680113	-3.045	0.00232677	0.0333209	815.366	766.361	874.708	831.877	713.003	894.229	926.893	911.594	958.283	Etfa	110842	electron transferring flavoprotein, alpha polypeptide [Source:MGI Symbol;Acc:MGI:106092]
ENSMUSG00000073676	751.811	-0.246507	0.080978	-3.04413	0.00233357	0.0333799	612.006	733.492	703.592	731.863	692.005	830.798	720.807	898.162	843.571	Hspe1	15528	heat shock protein 1 (chaperonin 10) [Source:MGI Symbol;Acc:MGI:104680]
ENSMUSG00000035266	403.053	0.240532	0.0790528	3.04268	0.00234481	0.0335023	395.154	444.593	459.142	414.173	449.164	355.835	363.855	358.19	387.372	Helq	191578	helicase, POLQ-like [Source:MGI Symbol;Acc:MGI:2176740]
ENSMUSG00000004885	452.052	-0.343031	0.112772	-3.0418	0.00235165	0.0335616	356.602	338.202	382.618	482.418	461.033	529.111	545.289	477.288	495.907	Crabp2	12904	cellular retinoic acid binding protein II [Source:MGI Symbol;Acc:MGI:88491]
ENSMUSG00000006586	1508.19	0.202119	0.0664797	3.04031	0.00236337	0.0336268	1647.12	1755.02	1619.75	1511.97	1470.74	1437.26	1453.45	1413.06	1265.36	Runx1t1	12395	RUNX1 translocation partner 1 [Source:MGI Symbol;Acc:MGI:104793]
ENSMUSG00000015804	1008.49	-0.176856	0.0581728	-3.04019	0.00236432	0.0336268	950.296	970.493	1001.18	926.007	917.501	1011.04	1043.25	1113.97	1142.7	Med28	66999	mediator complex subunit 28 [Source:MGI Symbol;Acc:MGI:1914249]
ENSMUSG00000052551	212.698	0.363311	0.119479	3.0408	0.00235953	0.0336268	247.694	273.33	243.388	221.206	194.455	194.162	185.379	177.304	177.362	Adarb2	94191	adenosine deaminase, RNA-specific, B2 [Source:MGI Symbol;Acc:MGI:2151118]
ENSMUSG00000028234	3292.37	-0.205885	0.0677622	-3.03834	0.00237881	0.0337944	2659.09	3143.29	3222.5	3226.32	3160.58	3296.12	3406.83	3832.63	3684.01	Rps20	67427	ribosomal protein S20 [Source:MGI Symbol;Acc:MGI:1914677]
ENSMUSG00000068798	631.957	-0.184117	0.0606368	-3.0364	0.00239425	0.0339656	609.115	564.824	603.687	605.964	597.06	691.558	696.156	668.92	650.326	Rap1a	109905	RAS-related protein 1a [Source:MGI Symbol;Acc:MGI:97852]
ENSMUSG00000095123	498.63	0.393133	0.129485	3.03613	0.00239632	0.0339656	465.51	524.17	584.556	653.029	562.369	474.189	505.847	343.862	374.136	Gm21781	NA	predicted gene, 21781 [Source:MGI Symbol;Acc:MGI:5433945]
ENSMUSG00000002496	1963.23	0.137469	0.0453215	3.0332	0.00241978	0.0341428	2082.75	2079.38	1961.98	2010.86	2089.71	1779.95	1966.2	1823.19	1875.09	Tsc2	22084	TSC complex subunit 2 [Source:MGI Symbol;Acc:MGI:102548]
ENSMUSG00000020262	1003.11	0.181597	0.0598607	3.03365	0.00241611	0.0341428	1039.93	1075.15	1023.5	1126.03	1027.97	857.872	987.043	931.294	959.165	Adarb1	110532	adenosine deaminase, RNA-specific, B1 [Source:MGI Symbol;Acc:MGI:891999]
ENSMUSG00000020814	2065.93	-0.326821	0.107741	-3.0334	0.00241818	0.0341428	2458.63	1588.94	1805.75	1814.36	1614.07	2426.64	2286.67	2308.54	2289.82	Mxra7	67622	matrix-remodelling associated 7 [Source:MGI Symbol;Acc:MGI:1914872]
ENSMUSG00000038274	2205.18	-0.204523	0.0674215	-3.03349	0.00241741	0.0341428	1884.21	2012.78	2193.68	2077.93	2160.01	2354.7	2135.8	2389.13	2638.37	Fau	14109	Finkel-Biskis-Reilly murine sarcoma virus (FBR-MuSV) ubiquitously expressed (fox derived) [Source:MGI Symbol;Acc:MGI:102547]
ENSMUSG00000039470	1132.86	-0.188885	0.0622838	-3.03265	0.00242415	0.0341657	1044.75	1053.53	1018.19	1080.15	1136.61	1198.24	1101.43	1293.07	1269.77	Zdhhc2	70546	zinc finger, DHHC domain containing 2 [Source:MGI Symbol;Acc:MGI:1923452]
ENSMUSG00000106262	80.4221	0.6061	0.200033	3.03	0.00244556	0.0344285	68.429	91.6865	106.283	105.897	103.162	79.6761	52.261	55.5195	60.8854	Gm43375	NA	predicted gene 43375 [Source:MGI Symbol;Acc:MGI:5663512]
ENSMUSG00000090841	1986.86	-0.177184	0.0584976	-3.02891	0.00245441	0.0345141	1673.14	1876.98	1920.53	1914.38	2003.89	2025.94	2072.69	2227.94	2166.28	Myl6	17904	myosin, light polypeptide 6, alkali, smooth muscle and non-muscle [Source:MGI Symbol;Acc:MGI:109318]
ENSMUSG00000004032	1371.04	-0.188404	0.0622161	-3.02822	0.00246001	0.034516	1344.49	1218.74	1383.8	1274.29	1235.2	1406.32	1376.53	1516.94	1583.02	Gstm5	14866	glutathione S-transferase, mu 5 [Source:MGI Symbol;Acc:MGI:1309466]
ENSMUSG00000039262	9666.1	0.132706	0.0438233	3.02821	0.00246009	0.034516	10427.2	10599.3	9435.79	9787.2	10039.6	8929.91	9662.37	9038.93	9074.57	Prrc2b	227723	proline-rich coiled-coil 2B [Source:MGI Symbol;Acc:MGI:1923304]
ENSMUSG00000015672	284.034	-0.274441	0.0906491	-3.02751	0.00246579	0.0345571	246.73	256.895	290.152	243.562	262.013	309.422	298.775	315.207	333.546	Mrpl32	NA	mitochondrial ribosomal protein L32 [Source:MGI Symbol;Acc:MGI:2137226]
ENSMUSG00000027692	1926.43	0.202818	0.0670914	3.02301	0.00250273	0.0350354	2044.2	2344.06	1957.73	1921.43	1957.33	1653.09	1787.72	1859.01	1813.33	Tnik	665113	TRAF2 and NCK interacting kinase [Source:MGI Symbol;Acc:MGI:1916264]
ENSMUSG00000071234	282.963	-0.326707	0.108089	-3.02258	0.00250633	0.0350465	225.527	264.68	246.576	255.328	279.358	321.799	269.193	325.953	358.253	Syndig1l	627191	synapse differentiation inducing 1 like [Source:MGI Symbol;Acc:MGI:2685107]
ENSMUSG00000032324	4343.97	-0.117568	0.0389301	-3.01996	0.00252804	0.0352965	3977.56	4191.63	4299.14	4200.56	4262.5	4471.92	4354.43	4682.44	4655.53	Tspan3	56434	tetraspanin 3 [Source:MGI Symbol;Acc:MGI:1928098]
ENSMUSG00000060279	1972.71	0.150933	0.0499822	3.01974	0.00252988	0.0352965	2099.13	2130.41	1935.41	2114.4	2038.59	1902.17	1968.17	1777.52	1788.62	Ap2a1	11771	adaptor-related protein complex 2, alpha 1 subunit [Source:MGI Symbol;Acc:MGI:101921]
ENSMUSG00000029823	4852.28	0.15766	0.0522278	3.01869	0.00253871	0.03538	4658.96	5273.71	5001.67	5398.37	5099.66	4700.12	4767.58	4495.29	4275.21	Luc7l2	192196	LUC7-like 2 (S. cerevisiae) [Source:MGI Symbol;Acc:MGI:2183260]
ENSMUSG00000028399	3558.49	0.211845	0.0702065	3.01745	0.0025491	0.0354851	3424.34	4378.46	3735.84	3885.23	3517.54	3331.7	3365.41	3335.65	3052.21	Ptprd	19266	protein tyrosine phosphatase, receptor type, D [Source:MGI Symbol;Acc:MGI:97812]
ENSMUSG00000087497	269.406	-0.294957	0.0978007	-3.0159	0.00256218	0.0356275	258.295	222.297	254.016	254.152	236.45	300.913	272.152	293.716	332.664	2810001G20Rik	66456	RIKEN cDNA 2810001G20 gene [Source:MGI Symbol;Acc:MGI:1913706]
ENSMUSG00000031696	2979.21	-0.154743	0.0513277	-3.01481	0.00257142	0.035716	2989.67	2891.59	2895.14	2727.43	2677.64	3071.01	3039.03	3412.66	3108.68	Vps35	65114	VPS35 retromer complex component [Source:MGI Symbol;Acc:MGI:1890467]
ENSMUSG00000019790	1156.57	0.172092	0.0571026	3.01373	0.0025806	0.0358037	1160.4	1238.63	1229.69	1201.34	1258.03	1106.18	991.973	1154.27	1068.58	Stxbp5	78808	syntaxin binding protein 5 (tomosyn) [Source:MGI Symbol;Acc:MGI:1926058]
ENSMUSG00000034613	1780.9	0.191424	0.0635287	3.01319	0.00258513	0.0358266	2089.49	1813.84	1937.54	1770.83	1811.26	1604.35	1802.51	1602.01	1596.26	Ppm1h	319468	protein phosphatase 1H (PP2C domain containing) [Source:MGI Symbol;Acc:MGI:2442087]
ENSMUSG00000019948	286.254	-0.305129	0.101307	-3.01192	0.00259599	0.0359204	275.644	257.76	291.215	240.032	230.973	297.045	302.719	341.176	339.723	Actr6	67019	ARP6 actin-related protein 6 [Source:MGI Symbol;Acc:MGI:1914269]
ENSMUSG00000034926	2785.62	0.123339	0.0409528	3.01173	0.00259766	0.0359204	2758.36	2869.1	2856.88	2938.04	3032.77	2663.35	2628.83	2581.66	2741.61	Dhcr24	74754	24-dehydrocholesterol reductase [Source:MGI Symbol;Acc:MGI:1922004]
ENSMUSG00000052572	1492.48	0.257096	0.0853816	3.01114	0.00260269	0.03595	1558.45	1842.38	1751.54	1449.61	1442.44	1261.67	1338.08	1494.55	1293.59	Dlg2	23859	discs large MAGUK scaffold protein 2 [Source:MGI Symbol;Acc:MGI:1344351]
ENSMUSG00000001998	523.023	0.199084	0.0661752	3.00844	0.00262595	0.0361911	553.215	552.714	573.927	558.899	534.98	468.001	498.945	504.153	462.376	Ap4e1	108011	adaptor-related protein complex AP-4, epsilon 1 [Source:MGI Symbol;Acc:MGI:1336993]
ENSMUSG00000061848	818.055	-0.457064	0.151915	-3.00868	0.00262383	0.0361911	745.973	631.426	637.697	628.32	865.463	968.49	682.351	927.712	1275.06	Gm5805	NA	predicted gene 5805 [Source:MGI Symbol;Acc:MGI:3644633]
ENSMUSG00000002393	848.64	-0.218611	0.0726823	-3.00776	0.00263181	0.0362317	746.937	714.463	777.99	862.469	855.421	887.267	891.395	984.127	917.693	Nr2f6	13864	nuclear receptor subfamily 2, group F, member 6 [Source:MGI Symbol;Acc:MGI:1352453]
ENSMUSG00000022890	1640.88	-0.162806	0.0541802	-3.0049	0.00265669	0.0365339	1402.31	1623.54	1641.01	1566.09	1558.38	1738.18	1701.93	1801.7	1734.79	Atp5j	11957	ATP synthase, H+ transporting, mitochondrial F0 complex, subunit F [Source:MGI Symbol;Acc:MGI:107777]
ENSMUSG00000025245	758.32	-0.236612	0.0787527	-3.0045	0.0026602	0.0365418	685.254	691.109	769.488	676.562	691.092	758.857	753.347	903.535	895.633	Lztfl1	93730	leucine zipper transcription factor-like 1 [Source:MGI Symbol;Acc:MGI:1934860]
ENSMUSG00000004610	503.69	-0.279783	0.09316	-3.00325	0.00267111	0.0366513	389.371	459.298	451.702	483.594	514.896	526.791	624.174	530.121	553.263	Etfb	110826	electron transferring flavoprotein, beta polypeptide [Source:MGI Symbol;Acc:MGI:106098]
ENSMUSG00000096054	282.079	0.304597	0.101444	3.0026	0.00267681	0.0366891	293.956	339.932	327.351	304.747	273.881	234.387	268.207	265.061	231.188	Syne1	64009	spectrin repeat containing, nuclear envelope 1 [Source:MGI Symbol;Acc:MGI:1927152]
ENSMUSG00000020907	113.859	-0.561222	0.186978	-3.00154	0.00268621	0.0367775	102.162	75.2522	85.0263	92.9537	115.03	149.296	97.6196	142.381	165.008	Rcvrn	19674	recoverin [Source:MGI Symbol;Acc:MGI:97883]
ENSMUSG00000002948	1587.87	0.129748	0.0432424	3.00048	0.00269551	0.0367836	1598.93	1620.95	1678.21	1675.52	1683.45	1506.88	1452.46	1519.62	1554.78	Map2k7	26400	mitogen-activated protein kinase kinase 7 [Source:MGI Symbol;Acc:MGI:1346871]
ENSMUSG00000029208	1767.66	0.13661	0.0455279	3.00057	0.00269471	0.0367836	1767.59	1812.11	1869.52	1933.2	1828.61	1729.67	1714.75	1636.03	1617.43	Guf1	NA	GUF1 homolog, GTPase [Source:MGI Symbol;Acc:MGI:2140726]
ENSMUSG00000041351	1168.27	0.173023	0.0576586	3.00082	0.00269251	0.0367836	1255.82	1213.55	1157.42	1279	1246.16	1090.71	1003.81	1102.33	1165.65	Rap1gap	110351	Rap1 GTPase-activating protein [Source:MGI Symbol;Acc:MGI:109338]
ENSMUSG00000008140	1282.73	0.199251	0.0664238	2.99969	0.00270253	0.036839	1219.19	1493.8	1283.9	1399.01	1407.75	1213.71	1132.98	1168.6	1225.65	Emc10	69683	ER membrane protein complex subunit 10 [Source:MGI Symbol;Acc:MGI:1916933]
ENSMUSG00000000247	3668.25	0.195106	0.0650554	2.99907	0.00270805	0.0368739	3725.04	3721.95	3662.51	4300.58	4026.05	3669.74	3555.72	3221.02	3131.63	Lhx2	16870	LIM homeobox protein 2 [Source:MGI Symbol;Acc:MGI:96785]
ENSMUSG00000019984	1152.87	0.171379	0.0571725	2.99758	0.0027213	0.0369735	1288.59	1172.03	1226.5	1189.57	1190.47	1140.22	1110.3	1057.56	1000.64	Med23	70208	mediator complex subunit 23 [Source:MGI Symbol;Acc:MGI:1917458]
ENSMUSG00000070880	757.961	0.240314	0.0801642	2.99777	0.00271963	0.0369735	896.324	785.39	784.367	849.526	753.172	756.536	696.156	692.202	607.971	Gad1	14415	glutamate decarboxylase 1 [Source:MGI Symbol;Acc:MGI:95632]
ENSMUSG00000024665	2245.28	0.155921	0.0520923	2.99316	0.00276103	0.0374282	2453.81	2478.13	2393.49	2242.65	2192.87	2196.12	2163.41	2037.21	2049.81	Fads2	56473	fatty acid desaturase 2 [Source:MGI Symbol;Acc:MGI:1930079]
ENSMUSG00000027936	557.618	0.250181	0.0835836	2.99319	0.00276081	0.0374282	589.839	563.959	634.509	629.496	585.192	566.242	496.972	439.678	512.673	Crtc2	74343	CREB regulated transcription coactivator 2 [Source:MGI Symbol;Acc:MGI:1921593]
ENSMUSG00000036036	1132.63	0.33179	0.110861	2.99286	0.00276378	0.0374282	1117.03	1651.22	1128.72	1242.52	1091.87	997.885	957.461	995.768	1011.23	Zfp57	22715	zinc finger protein 57 [Source:MGI Symbol;Acc:MGI:99204]
ENSMUSG00000021871	353.057	-0.276368	0.0923942	-2.99119	0.00277895	0.0375928	338.29	307.063	354.985	292.981	320.44	418.493	419.074	360.877	365.312	Gm49342	NA	predicted gene, 49342 [Source:MGI Symbol;Acc:MGI:6121535]
ENSMUSG00000052423	673.9	0.200651	0.0671003	2.99031	0.00278696	0.0376602	724.769	772.416	680.21	722.45	676.485	645.918	591.634	602.655	648.562	B4galt3	57370	UDP-Gal:betaGlcNAc beta 1,4-galactosyltransferase, polypeptide 3 [Source:MGI Symbol;Acc:MGI:1928767]
ENSMUSG00000034205	198.573	0.396204	0.132539	2.98935	0.00279575	0.0376973	258.295	188.563	190.246	216.5	257.448	167.088	178.476	156.708	173.832	Loxl2	94352	lysyl oxidase-like 2 [Source:MGI Symbol;Acc:MGI:2137913]
ENSMUSG00000045179	293.897	0.27064	0.090532	2.98945	0.00279484	0.0376973	316.123	322.633	295.466	347.106	310.398	270.744	239.612	263.27	279.72	Sox3	20675	SRY (sex determining region Y)-box 3 [Source:MGI Symbol;Acc:MGI:98365]
ENSMUSG00000030750	705.775	-0.2372	0.0793644	-2.98874	0.00280126	0.0377307	605.26	648.725	651.514	657.736	706.612	757.31	670.518	832.792	821.511	Nsmce1	67711	NSE1 homolog, SMC5-SMC6 complex component [Source:MGI Symbol;Acc:MGI:1914961]
ENSMUSG00000028675	2413	-0.180152	0.0603057	-2.98732	0.0028144	0.0378667	2453.81	2091.49	2445.57	2288.54	2115.27	2623.9	2491.76	2691.8	2514.83	Pnrc2	52830	proline-rich nuclear receptor coactivator 2 [Source:MGI Symbol;Acc:MGI:106512]
ENSMUSG00000021453	450.081	0.325129	0.108881	2.9861	0.00282565	0.0379691	553.215	502.546	514.409	448.296	454.642	431.643	314.552	436.992	394.431	Gadd45g	23882	growth arrest and DNA-damage-inducible 45 gamma [Source:MGI Symbol;Acc:MGI:1346325]
ENSMUSG00000026447	606.294	0.268941	0.0900723	2.98583	0.0028281	0.0379691	707.421	711.003	623.88	570.665	664.617	588.675	588.676	496.093	505.613	Pik3c2b	240752	phosphatidylinositol-4-phosphate 3-kinase catalytic subunit type 2 beta [Source:MGI Symbol;Acc:MGI:2685045]
ENSMUSG00000028822	969.599	-0.163526	0.0547907	-2.98455	0.00283993	0.0380868	900.179	935.03	884.273	930.713	953.105	1062.86	968.308	1070.99	1020.93	Tmem50a	71817	transmembrane protein 50A [Source:MGI Symbol;Acc:MGI:1919067]
ENSMUSG00000020866	999.311	0.234461	0.0785976	2.98306	0.00285384	0.0382198	1183.53	1046.61	937.415	1147.21	1038.92	936.775	965.349	822.942	915.045	Cacna1g	12291	calcium channel, voltage-dependent, T type, alpha 1G subunit [Source:MGI Symbol;Acc:MGI:1201678]
ENSMUSG00000027679	411.234	-0.224579	0.0752909	-2.98282	0.00285603	0.0382198	366.24	376.261	407.063	357.695	405.344	446.341	431.893	458.483	451.787	Dnajc19	67713	DnaJ heat shock protein family (Hsp40) member C19 [Source:MGI Symbol;Acc:MGI:1914963]
ENSMUSG00000044433	805.036	0.205078	0.0687606	2.9825	0.00285904	0.0382198	838.497	954.924	799.247	841.29	842.64	767.366	693.198	735.185	772.98	Camsap3	69697	calmodulin regulated spectrin-associated protein family, member 3 [Source:MGI Symbol;Acc:MGI:1916947]
ENSMUSG00000000223	319.993	0.354926	0.11906	2.98106	0.0028725	0.0383585	352.747	454.108	328.414	321.22	314.05	285.442	278.068	280.284	265.601	Drp2	13497	dystrophin related protein 2 [Source:MGI Symbol;Acc:MGI:107432]
ENSMUSG00000027714	748.463	-0.321817	0.107989	-2.9801	0.00288158	0.0383974	557.07	586.448	677.022	770.692	778.734	836.212	755.319	917.862	856.807	Exosc9	50911	exosome component 9 [Source:MGI Symbol;Acc:MGI:1355319]
ENSMUSG00000029510	250.217	0.396271	0.132961	2.98035	0.00287923	0.0383974	348.892	260.355	288.027	275.331	228.234	212.728	221.863	183.572	232.953	Gpc2	71951	glypican 2 (cerebroglycan) [Source:MGI Symbol;Acc:MGI:1919201]
ENSMUSG00000000581	1144.91	-0.194638	0.0653276	-2.97942	0.00288795	0.0384412	1028.36	1090.72	1152.11	1030.73	1077.26	1173.48	1129.03	1332.47	1290.06	C1d	57316	C1D nuclear receptor co-repressor [Source:MGI Symbol;Acc:MGI:1927354]
ENSMUSG00000015882	2304.12	0.183856	0.0617404	2.97789	0.00290241	0.0385513	2302.49	2436.61	2671.95	2300.31	2455.8	2049.92	2055.93	2360.47	2103.63	Lcorl	209707	ligand dependent nuclear receptor corepressor-like [Source:MGI Symbol;Acc:MGI:2651932]
ENSMUSG00000040550	781.394	-0.206657	0.0693966	-2.97791	0.00290217	0.0385513	718.023	738.682	782.242	638.909	775.996	806.044	856.883	872.193	843.571	Otud6b	72201	OTU domain containing 6B [Source:MGI Symbol;Acc:MGI:1919451]
ENSMUSG00000028295	212.373	-0.347364	0.116662	-2.97751	0.00290598	0.0385576	189.866	201.537	209.377	170.611	175.284	218.916	222.849	278.493	244.424	Smim8	66291	small integral membrane protein 8 [Source:MGI Symbol;Acc:MGI:1913541]
ENSMUSG00000021725	1208.85	0.197747	0.0664248	2.977	0.00291084	0.0385811	1460.14	1194.52	1296.65	1189.57	1268.07	1141.77	1111.29	1099.64	1118	Parp8	52552	poly (ADP-ribose) polymerase family, member 8 [Source:MGI Symbol;Acc:MGI:1098713]
ENSMUSG00000028524	1503.15	0.140139	0.0471085	2.97481	0.00293169	0.0388161	1613.38	1601.92	1547.48	1524.91	1547.43	1397.81	1483.03	1461.42	1350.95	Sgip1	73094	SH3-domain GRB2-like (endophilin) interacting protein 1 [Source:MGI Symbol;Acc:MGI:1920344]
ENSMUSG00000020536	2737.73	0.160732	0.0540438	2.97411	0.00293836	0.0388219	3214.24	2728.11	2775.05	2825.09	2819.15	2622.35	2616.99	2482.26	2556.3	Llgl1	16897	LLGL1 scribble cell polarity complex component [Source:MGI Symbol;Acc:MGI:102682]
ENSMUSG00000037020	452.231	0.247656	0.0832686	2.97418	0.00293772	0.0388219	505.026	462.758	464.456	495.361	504.854	452.529	427.949	366.249	390.902	Wdr62	233064	WD repeat domain 62 [Source:MGI Symbol;Acc:MGI:1923696]
ENSMUSG00000027018	1340.11	-0.158061	0.0531533	-2.97368	0.00294254	0.0388359	1240.4	1230.85	1396.56	1270.76	1236.12	1397.81	1390.34	1473.06	1425.07	Hat1	107435	histone aminotransferase 1 [Source:MGI Symbol;Acc:MGI:96013]
ENSMUSG00000093674	3385.45	-0.194242	0.0653321	-2.97314	0.00294765	0.0388622	2737.16	3395	3345.78	3052.18	3376.95	3588.52	3505.43	3765.47	3702.54	Rpl41	NA	ribosomal protein L41 [Source:MGI Symbol;Acc:MGI:1915195]
ENSMUSG00000015568	356.792	0.329067	0.110755	2.97112	0.00296713	0.0390776	349.855	444.593	364.55	365.932	435.47	331.081	350.05	272.224	297.368	Lpl	16956	lipoprotein lipase [Source:MGI Symbol;Acc:MGI:96820]
ENSMUSG00000021294	569.938	0.218199	0.0734569	2.97044	0.0029737	0.0391229	555.143	673.81	605.812	620.083	584.279	535.3	528.526	501.466	525.026	Kif26a	668303	kinesin family member 26A [Source:MGI Symbol;Acc:MGI:2447072]
ENSMUSG00000018476	2154.37	0.197584	0.0665393	2.96944	0.00298346	0.0391888	2610.9	2143.39	2163.92	2255.6	2248.56	2116.45	2002.68	1850.05	1997.75	Kdm6b	216850	KDM1 lysine (K)-specific demethylase 6B [Source:MGI Symbol;Acc:MGI:2448492]
ENSMUSG00000046329	2236.09	0.143205	0.0482288	2.96928	0.00298501	0.0391888	2299.6	2414.99	2222.37	2366.2	2365.42	2145.84	2253.14	1995.12	2062.16	Slc25a23	66972	solute carrier family 25 (mitochondrial carrier; phosphate carrier), member 23 [Source:MGI Symbol;Acc:MGI:1914222]
ENSMUSG00000022178	437.933	-0.354991	0.119674	-2.96633	0.00301379	0.0395251	467.438	330.418	352.859	412.997	385.259	562.374	535.429	474.602	420.021	Ajuba	16475	ajuba LIM protein [Source:MGI Symbol;Acc:MGI:1341886]
ENSMUSG00000021144	2168.02	0.178272	0.0601527	2.96365	0.00304011	0.0398174	2313.09	2286.11	2111.84	2429.74	2290.56	2128.82	2148.62	1833.93	1969.51	Mta1	116870	metastasis associated 1 [Source:MGI Symbol;Acc:MGI:2150037]
ENSMUSG00000063800	861.88	-0.16556	0.055868	-2.96341	0.00304247	0.0398174	832.714	811.339	856.64	825.993	763.214	904.285	906.186	905.325	951.224	Prpf38a	230596	PRP38 pre-mRNA processing factor 38 (yeast) domain containing A [Source:MGI Symbol;Acc:MGI:1916962]
ENSMUSG00000028991	1804.27	0.151246	0.0510502	2.9627	0.00304956	0.0398682	2006.61	1833.73	1830.19	1919.08	1847.78	1654.63	1825.19	1683.49	1637.73	Mtor	56717	mechanistic target of rapamycin kinase [Source:MGI Symbol;Acc:MGI:1928394]
ENSMUSG00000030852	1597.69	0.137402	0.0463918	2.96176	0.00305881	0.0399473	1704.94	1745.5	1567.67	1631.98	1672.5	1535.51	1493.88	1489.18	1538.02	Tacc2	57752	transforming, acidic coiled-coil containing protein 2 [Source:MGI Symbol;Acc:MGI:1928899]
ENSMUSG00000026349	1959.23	0.149311	0.0504407	2.96012	0.00307519	0.0400404	2179.13	1981.64	2095.9	2009.68	1979.25	1952.45	1855.76	1833.04	1746.26	Ccnt2	NA	cyclin T2 [Source:MGI Symbol;Acc:MGI:1920199]
ENSMUSG00000037344	439.814	0.233205	0.0787833	2.96008	0.00307558	0.0400404	442.379	483.517	496.341	508.304	426.341	397.607	391.464	401.173	411.197	Slc12a9	83704	solute carrier family 12 (potassium/chloride transporters), member 9 [Source:MGI Symbol;Acc:MGI:1933532]
ENSMUSG00000050310	1423.21	0.143578	0.0485038	2.96013	0.0030751	0.0400404	1497.73	1471.31	1427.38	1449.61	1580.29	1329.74	1359.77	1388.88	1304.18	Rictor	78757	RPTOR independent companion of MTOR, complex 2 [Source:MGI Symbol;Acc:MGI:1926007]
ENSMUSG00000001158	592.368	-0.218351	0.0737922	-2.959	0.00308636	0.0401387	563.817	523.305	599.435	551.839	524.025	605.693	607.411	693.993	661.798	Snrnp27	66618	small nuclear ribonucleoprotein 27 (U4/U6.U5) [Source:MGI Symbol;Acc:MGI:1913868]
ENSMUSG00000021244	2536.13	0.182163	0.061654	2.95461	0.00313067	0.0406337	2776.68	2809.41	2576.3	2512.1	2708.68	2430.51	2600.23	2245.85	2165.4	Ylpm1	56531	YLP motif containing 1 [Source:MGI Symbol;Acc:MGI:1926195]
ENSMUSG00000033768	2491.85	0.233322	0.0789726	2.95447	0.00313211	0.0406337	2580.06	3213.35	2389.24	2679.18	2481.36	2201.54	2208.77	2351.52	2321.59	Nrxn2	18190	neurexin II [Source:MGI Symbol;Acc:MGI:1096362]
ENSMUSG00000061286	324.586	-0.302376	0.102353	-2.95426	0.0031342	0.0406337	284.318	262.085	302.906	327.103	295.791	365.118	362.869	313.416	407.667	Exosc5	27998	exosome component 5 [Source:MGI Symbol;Acc:MGI:107889]
ENSMUSG00000015536	953.962	-0.166222	0.0562722	-2.9539	0.00313783	0.0406385	888.614	868.427	971.425	890.708	904.719	970.811	1055.08	1039.65	996.226	Mocs2	17434	molybdenum cofactor synthesis 2 [Source:MGI Symbol;Acc:MGI:1336894]
ENSMUSG00000068206	892.452	0.156204	0.0529244	2.95145	0.00316282	0.0409196	937.767	931.57	944.854	936.597	926.63	878.758	819.413	800.555	855.925	Pick1	18693	protein interacting with C kinase 1 [Source:MGI Symbol;Acc:MGI:894645]
ENSMUSG00000024887	164.421	0.566147	0.191916	2.94997	0.00317808	0.0410743	215.889	185.103	195.56	175.318	188.978	108.298	81.8427	158.499	170.303	Asah2	54447	N-acylsphingosine amidohydrolase 2 [Source:MGI Symbol;Acc:MGI:1859310]
ENSMUSG00000026021	1264.64	-0.170556	0.0578551	-2.94799	0.00319852	0.0412103	1171.97	1173.76	1295.59	1164.86	1183.16	1274.82	1296.66	1444.4	1376.54	Sumo1	22218	small ubiquitin-like modifier 1 [Source:MGI Symbol;Acc:MGI:1197010]
ENSMUSG00000052613	1067.49	0.270784	0.0918463	2.94823	0.00319601	0.0412103	1269.31	1064.77	1243.51	991.898	1206.9	916.662	853.925	1089.79	970.636	Pcdh15	11994	protocadherin 15 [Source:MGI Symbol;Acc:MGI:1891428]
ENSMUSG00000055407	2813.16	0.126302	0.0428345	2.94859	0.00319222	0.0412103	2909.68	3023.06	2742.1	2961.57	2972.52	2654.84	2592.34	2796.57	2665.72	Map6	17760	microtubule-associated protein 6 [Source:MGI Symbol;Acc:MGI:1201690]
ENSMUSG00000081406	179.457	-0.310655	0.10547	-2.94545	0.00322489	0.0415072	168.663	163.479	159.424	149.432	168.893	196.483	198.197	197.005	213.54	Rps6-ps4	NA	ribosomal protein S6, pseudogene 4 [Source:MGI Symbol;Acc:MGI:3650907]
ENSMUSG00000018474	4460.01	0.219844	0.0747232	2.94211	0.00325988	0.0419142	4364.04	5730.41	4485.14	4761.82	4451.48	4073.54	4236.1	4036.8	4000.79	Chd3	216848	chromodomain helicase DNA binding protein 3 [Source:MGI Symbol;Acc:MGI:1344395]
ENSMUSG00000063785	775.331	-0.205021	0.0697594	-2.93898	0.00329299	0.0422963	761.393	723.978	781.179	700.094	665.53	880.305	765.18	841.747	858.572	Utp14a	72554	UTP14A small subunit processome component [Source:MGI Symbol;Acc:MGI:1919804]
ENSMUSG00000026116	1698.92	0.177825	0.0605384	2.93738	0.00330994	0.0424701	1812.89	1829.41	1746.23	1753.18	1811.26	1553.3	1791.66	1523.2	1469.19	Tmem131	56030	transmembrane protein 131 [Source:MGI Symbol;Acc:MGI:1927110]
ENSMUSG00000021218	5839.22	-0.0974969	0.0332139	-2.93542	0.00333094	0.0426198	5657.44	5688.89	5760.53	5753.71	5456.62	6041.46	6226.95	6125.95	5841.47	Gdi2	NA	guanosine diphosphate (GDP) dissociation inhibitor 2 [Source:MGI Symbol;Acc:MGI:99845]
ENSMUSG00000025781	2559.5	-0.161021	0.0548498	-2.93567	0.00332833	0.0426198	2381.52	2453.91	2496.58	2345.02	2483.19	2732.19	2427.67	2851.19	2864.26	Atp5c1	11949	ATP synthase, H+ transporting, mitochondrial F1 complex, gamma polypeptide 1 [Source:MGI Symbol;Acc:MGI:1261437]
ENSMUSG00000029776	634.948	-0.189481	0.0645517	-2.93534	0.00333187	0.0426198	598.513	576.933	579.241	645.969	589.757	710.123	700.1	665.338	648.562	Hibadh	58875	3-hydroxyisobutyrate dehydrogenase [Source:MGI Symbol;Acc:MGI:1889802]
ENSMUSG00000042826	415.298	0.287888	0.098096	2.93476	0.00333811	0.0426559	510.808	445.458	446.388	468.298	387.998	403.795	390.478	342.967	341.488	Fgf11	14166	fibroblast growth factor 11 [Source:MGI Symbol;Acc:MGI:109167]
ENSMUSG00000000628	434.101	0.417064	0.14218	2.93334	0.00335332	0.0427625	629.354	462.758	513.346	449.472	387.998	392.966	431.893	320.58	318.545	Hk2	15277	hexokinase 2 [Source:MGI Symbol;Acc:MGI:1315197]
ENSMUSG00000035171	572.478	-0.203647	0.0694187	-2.93361	0.00335047	0.0427625	506.953	531.955	533.54	591.844	518.548	580.939	627.132	634.892	626.502	1110059E24Rik	NA	RIKEN cDNA 1110059E24 gene [Source:MGI Symbol;Acc:MGI:1913456]
ENSMUSG00000025261	8267.98	0.166184	0.0566733	2.93232	0.00336441	0.0428164	9154.07	8515.6	8566.4	8096.38	9102.88	7027.74	8396.27	7868.54	7683.91	Huwe1	59026	HECT, UBA and WWE domain containing 1 [Source:MGI Symbol;Acc:MGI:1926884]
ENSMUSG00000042115	1065.01	-0.239071	0.0815293	-2.93233	0.00336432	0.0428164	986.92	947.139	978.865	989.545	1028.88	1145.63	964.363	1256.35	1287.42	Klhdc8a	213417	kelch domain containing 8A [Source:MGI Symbol;Acc:MGI:2442630]
ENSMUSG00000014294	967.624	-0.21969	0.0749333	-2.93181	0.00336994	0.042843	792.235	890.051	994.807	889.531	942.15	983.961	1002.82	1088	1125.06	Ndufa2	17991	NADH:ubiquinone oxidoreductase subunit A2 [Source:MGI Symbol;Acc:MGI:1343103]
ENSMUSG00000024146	1000.56	-0.18577	0.0633924	-2.93048	0.00338437	0.0429388	905.962	978.278	886.399	936.597	1006.97	1076.01	995.917	1063.82	1155.06	Cript	56724	cysteine-rich PDZ-binding protein [Source:MGI Symbol;Acc:MGI:1929655]
ENSMUSG00000039194	772.091	0.256984	0.0876933	2.93048	0.00338437	0.0429388	867.41	888.321	875.771	708.331	822.555	792.12	649.811	645.638	698.858	Rlbp1	19771	retinaldehyde binding protein 1 [Source:MGI Symbol;Acc:MGI:97930]
ENSMUSG00000040824	1498.18	-0.24392	0.083318	-2.92759	0.00341605	0.0432525	1215.34	1441.9	1530.47	1342.53	1394.05	1539.37	1455.42	1729.16	1835.39	Snrpd2	107686	small nuclear ribonucleoprotein D2 [Source:MGI Symbol;Acc:MGI:98345]
ENSMUSG00000074505	2835.36	0.201001	0.0686541	2.92773	0.00341445	0.0432525	3320.25	2973.76	2964.23	2825.09	2959.74	2308.29	2791.53	2826.12	2549.24	Fat3	270120	FAT atypical cadherin 3 [Source:MGI Symbol;Acc:MGI:2444314]
ENSMUSG00000044709	361.982	-0.22351	0.0763743	-2.92651	0.00342784	0.04327	332.507	323.498	348.608	352.989	328.657	397.607	377.66	389.532	406.785	Gemin7	69731	gem nuclear organelle associated protein 7 [Source:MGI Symbol;Acc:MGI:1916981]
ENSMUSG00000072825	1681.17	0.14771	0.0504687	2.92676	0.00342518	0.04327	1807.1	1842.38	1664.39	1735.53	1732.75	1485.22	1607.27	1619.02	1636.85	Cep170b	217882	centrosomal protein 170B [Source:MGI Symbol;Acc:MGI:2145043]
ENSMUSG00000072893	348.167	0.282725	0.0965958	2.92689	0.00342368	0.04327	344.073	415.184	377.304	404.76	350.567	348.873	292.859	291.925	307.956	4933439C10Rik	NA	RIKEN cDNA 4933439C10 gene [Source:MGI Symbol;Acc:MGI:1921726]
ENSMUSG00000021396	289.379	-0.476309	0.162777	-2.92615	0.00343188	0.0432771	250.585	223.162	271.021	242.386	246.493	365.891	214.96	374.309	415.609	Nxnl2	75124	nucleoredoxin-like 2 [Source:MGI Symbol;Acc:MGI:1922374]
ENSMUSG00000043284	427.233	-0.215592	0.0736906	-2.92564	0.00343751	0.0433042	425.995	404.805	369.864	391.817	399.866	450.209	450.628	470.124	481.789	Tmem11	216821	transmembrane protein 11 [Source:MGI Symbol;Acc:MGI:2144726]
ENSMUSG00000053768	1288.37	-0.16968	0.0580062	-2.9252	0.00344237	0.0433217	1216.3	1218.74	1260.51	1215.46	1193.21	1319.68	1258.21	1476.64	1436.54	Chchd3	66075	coiled-coil-helix-coiled-coil-helix domain containing 3 [Source:MGI Symbol;Acc:MGI:1913325]
ENSMUSG00000047013	415.522	0.369856	0.126472	2.92442	0.00345095	0.0433859	442.379	586.448	373.053	483.594	423.602	345.779	343.148	334.908	406.785	Fbxo41	330369	F-box protein 41 [Source:MGI Symbol;Acc:MGI:1261912]
ENSMUSG00000028476	713.864	0.194359	0.0664791	2.92361	0.00346003	0.0434562	760.43	698.894	739.729	798.931	785.125	675.313	647.839	618.773	699.741	Reck	53614	reversion-inducing-cysteine-rich protein with kazal motifs [Source:MGI Symbol;Acc:MGI:1855698]
ENSMUSG00000028070	687.976	-0.196453	0.0672066	-2.92312	0.00346548	0.0434807	605.26	634.021	681.273	657.736	654.575	765.819	671.505	748.617	772.98	Naxe	246703	NAD(P)HX epimerase [Source:MGI Symbol;Acc:MGI:2180167]
ENSMUSG00000020149	3320.98	-0.10249	0.0350727	-2.92222	0.00347541	0.0435312	3268.21	3254.87	3149.16	3288.68	3119.5	3518.13	3468.95	3469.97	3351.34	Rab1a	19324	RAB1A, member RAS oncogene family [Source:MGI Symbol;Acc:MGI:97842]
ENSMUSG00000020457	1390.45	-0.133379	0.0456533	-2.92157	0.00348271	0.0435312	1311.72	1321.67	1369.99	1382.54	1281.76	1451.96	1461.34	1507.08	1425.95	Drg1	13494	developmentally regulated GTP binding protein 1 [Source:MGI Symbol;Acc:MGI:1343297]
ENSMUSG00000042541	1229.62	-0.230884	0.079026	-2.92162	0.00348214	0.0435312	996.558	1185.01	1339.16	1122.5	1065.4	1309.63	1325.26	1389.78	1333.3	Sem1	NA	SEM1, 26S proteasome complex subunit [Source:MGI Symbol;Acc:MGI:109238]
ENSMUSG00000043909	2990.74	0.126048	0.043145	2.9215	0.00348347	0.0435312	3214.24	3177.02	3144.91	2895.68	3093.94	2750.76	2960.14	2840.45	2839.55	Trp53bp1	27223	transformation related protein 53 binding protein 1 [Source:MGI Symbol;Acc:MGI:1351320]
ENSMUSG00000011752	878.941	0.196778	0.0673904	2.91997	0.00350069	0.0437024	970.536	937.625	985.242	844.819	917.501	768.913	886.465	817.569	781.804	Pgam1	18648	phosphoglycerate mutase 1 [Source:MGI Symbol;Acc:MGI:97552]
ENSMUSG00000024006	1765.55	0.221523	0.0759036	2.91847	0.00351749	0.0438682	2062.51	1811.24	1963.04	1826.13	1761.97	1792.33	1725.6	1447.98	1499.19	Stk38	106504	serine/threonine kinase 38 [Source:MGI Symbol;Acc:MGI:2442572]
ENSMUSG00000036281	619.544	0.188991	0.0647745	2.91768	0.00352642	0.0438917	650.558	683.324	643.011	625.967	673.747	615.749	551.206	558.777	573.558	Snapc4	227644	small nuclear RNA activating complex, polypeptide 4 [Source:MGI Symbol;Acc:MGI:2443935]
ENSMUSG00000074406	539.205	0.214221	0.0734202	2.91773	0.00352585	0.0438917	523.337	576.933	594.121	603.611	576.063	501.263	455.558	493.407	528.556	Zfp628	232816	zinc finger protein 628 [Source:MGI Symbol;Acc:MGI:2665174]
ENSMUSG00000097290	527.632	0.217858	0.0746914	2.91678	0.00353669	0.0439756	541.649	513.791	582.43	602.434	576.063	509.772	456.544	468.334	497.672	1300002E11Rik	NA	RIKEN cDNA 1300002E11 gene [Source:MGI Symbol;Acc:MGI:1919001]
ENSMUSG00000063229	9570.85	0.228853	0.0784738	2.91629	0.00354217	0.0439998	10143.9	10466.1	11793.1	9269.48	9520.1	8813.11	7611.37	8872.37	9648.13	Ldha	16828	lactate dehydrogenase A [Source:MGI Symbol;Acc:MGI:96759]
ENSMUSG00000064330	112.161	-0.685976	0.23531	-2.9152	0.00355464	0.0441108	67.4652	86.4967	74.398	91.777	121.42	155.484	81.8427	158.499	172.067	Pde6h	78600	phosphodiesterase 6H, cGMP-specific, cone, gamma [Source:MGI Symbol;Acc:MGI:1925850]
ENSMUSG00000040272	417.673	0.245781	0.0844511	2.91034	0.00361041	0.0447583	401.9	430.754	451.702	498.891	463.771	400.701	353.994	379.681	377.666	Accs	329470	1-aminocyclopropane-1-carboxylate synthase (non-functional) [Source:MGI Symbol;Acc:MGI:1919717]
ENSMUSG00000004099	4668.56	0.147651	0.0507691	2.90828	0.00363426	0.0450092	5142.78	4747.81	5015.49	4718.28	4773.74	4666.08	4618.69	4103.07	4231.09	Dnmt1	13433	DNA methyltransferase (cytosine-5) 1 [Source:MGI Symbol;Acc:MGI:94912]
ENSMUSG00000034312	1861.51	0.131665	0.0452866	2.90737	0.00364486	0.0450956	1901.56	1908.12	1905.65	1939.08	2027.63	1706.46	1727.57	1768.56	1868.92	Iqsec1	232227	IQ motif and Sec7 domain 1 [Source:MGI Symbol;Acc:MGI:1196356]
ENSMUSG00000025437	1667.18	0.126161	0.0434016	2.90683	0.00365114	0.0451285	1772.41	1737.72	1736.66	1773.18	1639.63	1600.48	1607.27	1596.63	1540.66	Usp33	170822	ubiquitin specific peptidase 33 [Source:MGI Symbol;Acc:MGI:2159711]
ENSMUSG00000037110	502.766	0.221123	0.0760948	2.90589	0.00366212	0.0452194	564.78	563.959	533.54	481.241	536.806	443.247	499.931	454.901	446.493	Ralgapa2	241694	Ral GTPase activating protein, alpha subunit 2 (catalytic) [Source:MGI Symbol;Acc:MGI:3036245]
ENSMUSG00000039474	320.085	0.268993	0.0925786	2.90556	0.00366591	0.0452213	327.688	325.228	324.163	358.872	395.301	278.48	279.054	294.611	297.368	Wfs1	22393	wolframin ER transmembrane glycoprotein [Source:MGI Symbol;Acc:MGI:1328355]
ENSMUSG00000022836	620.502	-0.481114	0.165631	-2.90473	0.00367573	0.0452976	522.374	448.918	482.524	564.782	619.883	544.582	560.08	893.684	947.694	Mylk	107589	myosin, light polypeptide kinase [Source:MGI Symbol;Acc:MGI:894806]
ENSMUSG00000031229	6832.78	0.132359	0.0455824	2.90373	0.0036875	0.0453651	7244.8	7388.55	7388.78	6749.14	6773.98	6182.25	6618.41	6799.34	6349.73	Atrx	22589	ATRX, chromatin remodeler [Source:MGI Symbol;Acc:MGI:103067]
ENSMUSG00000054387	3109.41	0.167497	0.0576852	2.90364	0.00368849	0.0453651	3428.2	3268.71	3267.13	3214.55	3165.15	3158.42	3080.44	2724.93	2677.19	Mdm4	17248	transformed mouse 3T3 cell double minute 4 [Source:MGI Symbol;Acc:MGI:107934]
ENSMUSG00000038025	2318.56	0.136338	0.0469797	2.90207	0.00370702	0.045548	2541.51	2349.25	2393.49	2396.79	2397.37	2333.81	2229.47	2081.08	2144.22	Phf2	18676	PHD finger protein 2 [Source:MGI Symbol;Acc:MGI:1338034]
ENSMUSG00000034818	1023.56	0.373196	0.128639	2.90112	0.00371835	0.0455589	984.992	1582.03	1010.75	1133.09	983.232	950.699	868.716	839.06	859.454	Celf5	319586	CUGBP, Elav-like family member 5 [Source:MGI Symbol;Acc:MGI:2442333]
ENSMUSG00000035649	891.055	0.194708	0.0671021	2.90167	0.00371176	0.0455589	969.572	926.38	936.352	1024.84	866.376	889.588	800.678	828.315	777.392	Zcchc7	319885	zinc finger, CCHC domain containing 7 [Source:MGI Symbol;Acc:MGI:2442912]
ENSMUSG00000063455	1378.97	0.231439	0.0797772	2.90107	0.00371887	0.0455589	1452.43	1678.9	1369.99	1410.78	1465.26	1174.26	1448.52	1202.62	1208	D630045J12Rik	330286	RIKEN cDNA D630045J12 gene [Source:MGI Symbol;Acc:MGI:2669829]
ENSMUSG00000020783	1350.56	-0.130636	0.045056	-2.8994	0.00373872	0.0457571	1304.01	1252.47	1321.1	1283.7	1318.28	1373.06	1412.03	1424.7	1465.66	Ncbp3	NA	nuclear cap binding subunit 3 [Source:MGI Symbol;Acc:MGI:1914124]
ENSMUSG00000049090	359.86	-0.241098	0.0831805	-2.89849	0.00374964	0.0458457	343.109	308.793	309.283	360.048	345.09	407.663	374.701	383.263	406.785	Zadh2	225791	zinc binding alcohol dehydrogenase, domain containing 2 [Source:MGI Symbol;Acc:MGI:2444835]
ENSMUSG00000001313	2108.52	-0.212217	0.0732477	-2.89725	0.00376449	0.0459401	2174.31	1777.51	1932.22	1983.8	1983.81	2538.81	2108.19	2108.84	2369.24	Rnd2	11858	Rho family GTPase 2 [Source:MGI Symbol;Acc:MGI:1338755]
ENSMUSG00000061315	3835.91	-0.152739	0.052719	-2.89723	0.00376473	0.0459401	3420.49	3797.21	3952.66	3638.14	3465.5	3996.96	3862.38	4229.33	4160.5	Naca	17938	nascent polypeptide-associated complex alpha polypeptide [Source:MGI Symbol;Acc:MGI:106095]
ENSMUSG00000038143	3757.24	0.114938	0.0396958	2.89547	0.00378592	0.0461534	3829.13	4076.59	3842.12	3741.68	3953.01	3528.96	3702.64	3669.66	3471.35	Stox2	71069	storkhead box 2 [Source:MGI Symbol;Acc:MGI:1918319]
ENSMUSG00000027589	1871.18	-0.151089	0.0522121	-2.89376	0.0038066	0.0463602	1934.32	1659.01	1805.75	1752	1768.36	1967.92	1917.88	2064.97	1970.39	Pcmtd2	245867	protein-L-isoaspartate (D-aspartate) O-methyltransferase domain containing 2 [Source:MGI Symbol;Acc:MGI:1923927]
ENSMUSG00000002661	215.692	-0.295538	0.102186	-2.89215	0.0038262	0.0464625	212.034	194.618	191.309	181.201	199.933	237.481	217.918	257.897	248.836	Alkbh7	66400	alkB homolog 7 [Source:MGI Symbol;Acc:MGI:1913650]
ENSMUSG00000011751	313.284	0.525542	0.181684	2.89262	0.0038204	0.0464625	308.413	564.824	319.911	331.809	286.662	250.632	246.514	233.719	277.073	Sptbn4	80297	spectrin beta, non-erythrocytic 4 [Source:MGI Symbol;Acc:MGI:1890574]
ENSMUSG00000024900	630.902	-0.280349	0.0969334	-2.89219	0.0038257	0.0464625	481.895	583.853	527.163	622.437	663.704	637.409	746.445	714.589	700.623	Cpt1a	12894	carnitine palmitoyltransferase 1a, liver [Source:MGI Symbol;Acc:MGI:1098296]
ENSMUSG00000027893	4271.29	0.101175	0.0349982	2.89087	0.00384177	0.0466063	4447.89	4584.33	4438.37	4244.1	4300.84	4120.73	4174.96	4108.44	4021.96	Ahcyl1	229709	S-adenosylhomocysteine hydrolase-like 1 [Source:MGI Symbol;Acc:MGI:2385184]
ENSMUSG00000032382	1272.89	-0.201603	0.0697587	-2.89	0.00385238	0.0466895	1354.12	1186.74	1240.32	1058.97	1125.65	1411.74	1349.91	1340.53	1388.01	Snx1	56440	sorting nexin 1 [Source:MGI Symbol;Acc:MGI:1928395]
ENSMUSG00000043336	310.487	0.390663	0.135292	2.88755	0.00388254	0.0470093	434.669	321.768	349.671	324.75	304.008	214.275	251.444	298.193	295.603	Filip1l	78749	filamin A interacting protein 1-like [Source:MGI Symbol;Acc:MGI:1925999]
ENSMUSG00000039405	1541.96	0.20931	0.0725081	2.88672	0.00389285	0.0470884	1673.14	1526.67	1743.04	1640.22	1620.46	1557.17	1533.32	1267.99	1315.65	Prss23	76453	protease, serine 23 [Source:MGI Symbol;Acc:MGI:1923703]
ENSMUSG00000002190	350.932	0.238467	0.0826474	2.88535	0.00390974	0.0471286	372.986	358.096	407.063	374.168	369.739	301.686	326.385	342.072	306.192	Clgn	12745	calmegin [Source:MGI Symbol;Acc:MGI:107472]
ENSMUSG00000006576	846.56	0.225615	0.0782047	2.88492	0.00391509	0.0471286	802.836	987.793	817.315	981.308	934.846	775.875	742.501	766.527	810.04	Slc4a3	20536	solute carrier family 4 (anion exchanger), member 3 [Source:MGI Symbol;Acc:MGI:109350]
ENSMUSG00000031391	2437.44	0.219848	0.0761763	2.88604	0.0039012	0.0471286	2472.12	3093.99	2274.45	2594.47	2567.18	2227.84	2191.02	2282.57	2233.35	L1cam	16728	L1 cell adhesion molecule [Source:MGI Symbol;Acc:MGI:96721]
ENSMUSG00000040929	1111.17	0.214374	0.0743072	2.88497	0.00391454	0.0471286	1127.63	1216.14	1170.17	1201.34	1203.25	1083.75	1148.76	905.325	944.165	Rfx3	19726	regulatory factor X, 3 (influences HLA class II expression) [Source:MGI Symbol;Acc:MGI:106582]
ENSMUSG00000066189	419.108	0.295781	0.102518	2.88516	0.00391216	0.0471286	496.351	486.112	424.069	458.885	418.125	410.757	412.172	314.312	351.194	Cacng3	NA	calcium channel, voltage-dependent, gamma subunit 3 [Source:MGI Symbol;Acc:MGI:1859165]
ENSMUSG00000034163	1331.72	0.208063	0.0721867	2.88229	0.00394794	0.0474781	1566.16	1274.96	1402.93	1433.13	1405.01	1302.67	1313.43	1147.1	1140.06	Zfc3h1	216345	zinc finger, C3H1-type containing [Source:MGI Symbol;Acc:MGI:2446143]
ENSMUSG00000070000	453.703	0.292504	0.101523	2.88116	0.00396208	0.0476023	445.271	592.503	441.074	520.07	471.075	416.946	370.757	402.964	422.668	Fcho1	74015	FCH domain only 1 [Source:MGI Symbol;Acc:MGI:1921265]
ENSMUSG00000045215	781.526	0.30526	0.106012	2.87948	0.00398334	0.0478116	717.059	1031.91	800.31	842.466	875.506	595.637	746.445	739.663	684.74	Asxl3	211961	additional sex combs like 3, transcriptional regulator [Source:MGI Symbol;Acc:MGI:2685175]
ENSMUSG00000070565	1014.64	0.169708	0.0589743	2.87766	0.00400636	0.0480416	1028.36	1134.84	1043.7	1049.55	1076.35	873.343	993.945	973.382	958.283	Rasal2	226525	RAS protein activator like 2 [Source:MGI Symbol;Acc:MGI:2443881]
ENSMUSG00000034892	3818.97	-0.200333	0.0696529	-2.87617	0.00402535	0.0481853	3016.66	3762.61	3885.7	3554.6	3689.17	3950.54	4081.29	4394.1	4036.08	Rps29	NA	ribosomal protein S29 [Source:MGI Symbol;Acc:MGI:107681]
ENSMUSG00000036192	7935.24	0.17442	0.0606445	2.87611	0.00402608	0.0481853	8368.58	8047.66	9302.94	8130.51	7945.28	8153.27	7043.4	7440.5	6985.05	Rorb	225998	RAR-related orphan receptor beta [Source:MGI Symbol;Acc:MGI:1343464]
ENSMUSG00000039703	1510.26	0.151032	0.0525215	2.87562	0.0040324	0.0482146	1515.08	1620.95	1598.49	1530.79	1632.33	1431.85	1532.33	1353.06	1377.42	Nploc4	217365	NPL4 homolog, ubiquitin recognition factor [Source:MGI Symbol;Acc:MGI:2679787]
ENSMUSG00000063856	1090.04	-0.28781	0.100101	-2.8752	0.00403774	0.0482322	904.998	1143.49	892.776	954.246	1067.22	1332.83	1048.18	1109.49	1357.13	Gpx1	14775	glutathione peroxidase 1 [Source:MGI Symbol;Acc:MGI:104887]
ENSMUSG00000024309	1070.75	-0.156746	0.0545261	-2.87469	0.00404418	0.0482629	980.174	1078.61	1050.07	1008.37	977.754	1176.58	1083.68	1123.82	1157.7	Pfdn6	NA	prefoldin subunit 6 [Source:MGI Symbol;Acc:MGI:95908]
ENSMUSG00000020196	1642.07	0.150276	0.052309	2.87285	0.00406792	0.0483298	1771.44	1633.92	1709.03	1660.22	1811.26	1547.11	1652.63	1507.08	1485.96	Cabin1	104248	calcineurin binding protein 1 [Source:MGI Symbol;Acc:MGI:1298375]
ENSMUSG00000030683	1164.88	0.202404	0.0704564	2.87275	0.00406918	0.0483298	1181.61	1363.19	1094.71	1249.58	1294.54	1137.9	1039.3	1028.9	1094.17	Sez6l2	233878	seizure related 6 homolog like 2 [Source:MGI Symbol;Acc:MGI:2385295]
ENSMUSG00000043962	3781.62	0.1117	0.0388685	2.87379	0.00405579	0.0483298	3811.79	3928.68	4129.09	3791.1	3892.76	3566.86	3761.81	3547.87	3604.59	Thrap3	230753	thyroid hormone receptor associated protein 3 [Source:MGI Symbol;Acc:MGI:2442637]
ENSMUSG00000068394	594.459	0.224469	0.0781173	2.87348	0.00405976	0.0483298	567.672	589.043	665.331	674.208	681.05	554.639	540.359	512.212	565.616	Cep152	99100	centrosomal protein 152 [Source:MGI Symbol;Acc:MGI:2139083]
ENSMUSG00000104244	79.3282	0.516398	0.179727	2.87323	0.00406295	0.0483298	67.4652	96.8763	92.4661	109.426	92.2065	66.5257	59.1634	68.0561	61.7678	2900018N21Rik	NA	RIKEN cDNA 2900018N21 gene [Source:MGI Symbol;Acc:MGI:1920114]
ENSMUSG00000008683	5084.25	-0.160174	0.0557981	-2.8706	0.00409694	0.0485669	4324.52	4962.32	4785.92	4944.19	5143.48	5250.11	5103.83	5646.87	5597.04	Rps15a	267019	ribosomal protein S15A [Source:MGI Symbol;Acc:MGI:2389091]
ENSMUSG00000017978	226.569	-0.328678	0.114493	-2.87072	0.00409544	0.0485669	190.83	208.457	215.754	211.793	190.804	279.253	287.929	232.824	221.482	Cadps2	320405	Ca2+-dependent activator protein for secretion 2 [Source:MGI Symbol;Acc:MGI:2443963]
ENSMUSG00000019689	218.385	-0.291271	0.101556	-2.86807	0.00412978	0.0489097	181.192	197.213	194.498	210.617	209.975	231.293	228.765	249.838	262.072	Fmc1	66117	formation of mitochondrial complex V assembly factor 1 [Source:MGI Symbol;Acc:MGI:1913367]
ENSMUSG00000021967	428.817	-0.240835	0.0840418	-2.86566	0.00416139	0.0490342	400.936	397.885	366.676	395.347	423.602	502.81	424.99	443.26	503.849	Mrpl57	67840	mitochondrial ribosomal protein L57 [Source:MGI Symbol;Acc:MGI:1915090]
ENSMUSG00000022370	772.242	-0.204858	0.0714763	-2.8661	0.00415563	0.0490342	637.065	698.894	719.535	771.869	789.69	817.647	812.511	841.747	861.219	Mrpl13	NA	mitochondrial ribosomal protein L13 [Source:MGI Symbol;Acc:MGI:2137218]
ENSMUSG00000046876	185.704	0.392647	0.137018	2.86566	0.00416145	0.0490342	160.953	217.972	214.691	232.973	212.714	180.238	163.685	151.335	136.771	Atxn1	20238	ataxin 1 [Source:MGI Symbol;Acc:MGI:104783]
ENSMUSG00000049680	545.777	-0.268982	0.0938636	-2.86567	0.00416125	0.0490342	594.658	451.513	483.587	447.119	523.112	618.07	642.909	569.522	581.499	Urgcp	72046	upregulator of cell proliferation [Source:MGI Symbol;Acc:MGI:1919296]
ENSMUSG00000056679	513.328	0.200138	0.0698295	2.8661	0.00415562	0.0490342	532.012	573.473	530.351	543.603	544.11	501.263	470.349	486.243	438.551	Gpr173	70771	G-protein coupled receptor 173 [Source:MGI Symbol;Acc:MGI:1918021]
ENSMUSG00000062328	1560.73	-0.218153	0.0761387	-2.86521	0.00416736	0.0490342	1265.46	1588.08	1503.9	1408.42	1507.26	1500.7	1780.82	1773.94	1718.03	Rpl17	319195	ribosomal protein L17 [Source:MGI Symbol;Acc:MGI:2448270]
ENSMUSG00000103133	63.9191	0.51289	0.179008	2.86517	0.00416785	0.0490342	75.1756	70.9273	74.398	70.5977	77.5996	57.243	53.2471	53.7285	42.355	Gm37303	NA	predicted gene, 37303 [Source:MGI Symbol;Acc:MGI:5610531]
ENSMUSG00000074578	482.405	-0.227551	0.0794507	-2.86405	0.00418263	0.0491617	452.981	437.673	486.775	418.88	444.6	478.057	515.708	574	532.968	Zfas1	68949	zinc finger, NFX1-type containing 1, antisense RNA 1 [Source:MGI Symbol;Acc:MGI:1916199]
ENSMUSG00000068740	3340.8	0.17997	0.0628536	2.86332	0.00419226	0.0492285	3619.03	3502.25	3531.78	3368.69	3600.62	3410.6	3313.15	2753.59	2967.5	Celsr2	53883	cadherin, EGF LAG seven-pass G-type receptor 2 [Source:MGI Symbol;Acc:MGI:1858235]
ENSMUSG00000021279	3441.25	0.12504	0.0436875	2.86215	0.00420772	0.0492707	3436.87	3756.55	3577.48	3408.69	3682.78	3219.53	3180.03	3291.77	3417.52	Cdc42bpb	217866	CDC42 binding protein kinase beta [Source:MGI Symbol;Acc:MGI:2136459]
ENSMUSG00000028691	2604.1	-0.136576	0.0477083	-2.86274	0.00419999	0.0492707	2351.65	2501.49	2584.8	2447.39	2582.7	2568.97	2746.17	2853.88	2799.84	Prdx1	NA	peroxiredoxin 1 [Source:MGI Symbol;Acc:MGI:99523]
ENSMUSG00000057230	966.93	0.25618	0.0894986	2.86239	0.00420464	0.0492707	1082.34	1217.01	1004.37	900.121	1004.23	773.555	908.158	916.071	896.515	Aak1	269774	AP2 associated kinase 1 [Source:MGI Symbol;Acc:MGI:1098687]
ENSMUSG00000013367	1166.76	0.131656	0.046034	2.85997	0.0042368	0.049459	1214.37	1209.22	1215.88	1248.4	1183.16	1127.84	1110.3	1072.78	1118.88	Iglon5	210094	IgLON family member 5 [Source:MGI Symbol;Acc:MGI:2686277]
ENSMUSG00000028681	256.749	0.303823	0.106249	2.85953	0.00424276	0.049459	272.752	264.68	271.021	271.801	321.353	218.916	224.821	206.855	258.542	Ptch2	19207	patched 2 [Source:MGI Symbol;Acc:MGI:1095405]
ENSMUSG00000031221	783.159	-0.170118	0.059493	-2.85946	0.00424365	0.049459	737.299	731.762	776.928	728.333	736.739	843.948	768.138	859.656	865.631	Igbp1	18518	immunoglobulin (CD79A) binding protein 1 [Source:MGI Symbol;Acc:MGI:1346500]
ENSMUSG00000038604	533.902	0.202786	0.070905	2.85997	0.00423678	0.049459	569.599	597.692	548.419	562.429	556.891	533.753	496.972	456.692	482.671	Ripor1	75687	RHO family interacting cell polarization regulator 1 [Source:MGI Symbol;Acc:MGI:1922937]
ENSMUSG00000041319	425.815	-0.226299	0.0791265	-2.85997	0.00423683	0.049459	396.117	389.235	413.44	396.524	386.172	481.924	407.241	474.602	487.083	Thoc6	386612	THO complex 6 [Source:MGI Symbol;Acc:MGI:2677480]
ENSMUSG00000034730	886.393	0.322492	0.112794	2.85914	0.00424796	0.0494629	821.148	1272.37	945.917	977.779	847.205	782.064	769.124	791.6	770.332	Adgrb1	107831	adhesion G protein-coupled receptor B1 [Source:MGI Symbol;Acc:MGI:1933736]
ENSMUSG00000104184	116.071	0.47828	0.167324	2.8584	0.00425777	0.0495309	93.4875	131.475	162.613	136.489	139.679	92.8265	100.578	89.5475	97.946	Gm37818	NA	predicted gene, 37818 [Source:MGI Symbol;Acc:MGI:5611046]
ENSMUSG00000006418	1243.35	-0.128422	0.0449444	-2.85735	0.004272	0.0496038	1223.05	1165.11	1187.18	1224.87	1172.21	1333.61	1286.8	1294.86	1302.42	Rnf114	81018	ring finger protein 114 [Source:MGI Symbol;Acc:MGI:1933159]
ENSMUSG00000038175	320.017	0.26413	0.0924316	2.85757	0.00426897	0.0496038	337.326	349.447	352.859	350.635	339.612	328.761	288.915	276.702	255.895	Mylip	218203	myosin regulatory light chain interacting protein [Source:MGI Symbol;Acc:MGI:2388271]
ENSMUSG00000053012	383.413	-0.245948	0.0860959	-2.85667	0.00428108	0.0496167	361.421	351.177	343.294	378.874	335.96	415.399	473.307	407.441	383.843	Krcc1	NA	lysine-rich coiled-coil 1 [Source:MGI Symbol;Acc:MGI:1889377]
ENSMUSG00000055013	4974.79	0.123735	0.0433126	2.8568	0.00427936	0.0496167	4963.51	5370.58	5149.4	5112.45	5219.25	4531.48	4543.75	5003.92	4878.77	Agap1	347722	ArfGAP with GTPase domain, ankyrin repeat and PH domain 1 [Source:MGI Symbol;Acc:MGI:2653690]
ENSMUSG00000031987	2031.03	0.139297	0.048797	2.85463	0.00430871	0.0498906	2109.73	2226.43	2166.04	2122.64	1965.55	2012.79	1861.67	1919	1895.39	Egln1	112405	egl-9 family hypoxia-inducible factor 1 [Source:MGI Symbol;Acc:MGI:1932286]
ENSMUSG00000038780	1111.06	0.145287	0.0509668	2.85063	0.00436332	0.0504759	1102.57	1220.47	1180.8	1169.57	1129.3	1057.45	1032.4	1075.47	1031.52	Smurf1	75788	SMAD specific E3 ubiquitin protein ligase 1 [Source:MGI Symbol;Acc:MGI:1923038]
ENSMUSG00000024130	1326.98	0.174633	0.0612805	2.84973	0.00437559	0.0505265	1517	1486.01	1333.85	1270.76	1378.53	1239.23	1222.71	1279.63	1215.06	Abca3	27410	ATP-binding cassette, sub-family A (ABC1), member 3 [Source:MGI Symbol;Acc:MGI:1351617]
ENSMUSG00000026411	1451.27	-0.204917	0.0719153	-2.84942	0.00437986	0.0505265	1200.88	1345.89	1390.18	1386.07	1472.57	1464.34	1465.28	1625.29	1710.97	Tmem9	NA	transmembrane protein 9 [Source:MGI Symbol;Acc:MGI:1913491]
ENSMUSG00000030302	684.561	0.255628	0.089703	2.84972	0.0043758	0.0505265	746.937	883.997	691.901	663.619	700.222	586.354	607.411	621.46	659.15	Atp2b2	11941	ATPase, Ca++ transporting, plasma membrane 2 [Source:MGI Symbol;Acc:MGI:105368]
ENSMUSG00000052331	454.132	0.261554	0.0918107	2.84883	0.00438798	0.0505733	433.705	550.984	452.765	505.95	506.679	406.116	436.823	423.56	370.607	Ankrd44	329154	ankyrin repeat domain 44 [Source:MGI Symbol;Acc:MGI:3045243]
ENSMUSG00000034120	7969.73	0.110803	0.0389046	2.84807	0.00439856	0.0506485	7803.8	8141.07	8349.58	8770.59	8143.39	7839.2	7515.72	7629.45	7534.79	Srsf2	20382	serine/arginine-rich splicing factor 2 [Source:MGI Symbol;Acc:MGI:98284]
ENSMUSG00000037989	2340.13	0.191889	0.0674003	2.84701	0.00441326	0.0507708	2185.87	2495.43	2455.13	2546.22	2703.2	2248.72	2331.04	2014.82	2080.69	Wnk2	75607	WNK lysine deficient protein kinase 2 [Source:MGI Symbol;Acc:MGI:1922857]
ENSMUSG00000004530	3394.33	0.16661	0.0585918	2.84357	0.00446108	0.0509671	3516.87	3743.58	3825.12	3342.8	3407.99	3422.98	3256.94	2944.32	3088.39	Coro1c	23790	coronin, actin binding protein 1C [Source:MGI Symbol;Acc:MGI:1345964]
ENSMUSG00000025332	2070.77	-0.249248	0.087637	-2.8441	0.00445377	0.0509671	1946.85	1645.17	1679.27	2113.23	2169.14	2281.99	2475	2168.84	2157.46	Kdm5c	20591	lysine (K)-specific demethylase 5C [Source:MGI Symbol;Acc:MGI:99781]
ENSMUSG00000027238	1236.58	0.196767	0.0691926	2.84375	0.00445857	0.0509671	1525.68	1223.06	1260.51	1289.59	1255.29	1128.62	1154.67	1161.43	1130.35	Frmd5	228564	FERM domain containing 5 [Source:MGI Symbol;Acc:MGI:2442557]
ENSMUSG00000030583	1519.62	0.21785	0.0765621	2.8454	0.00443559	0.0509671	1649.04	1431.52	1597.43	1770.83	1654.24	1337.48	1581.63	1277.84	1376.54	Sipa1l3	74206	signal-induced proliferation-associated 1 like 3 [Source:MGI Symbol;Acc:MGI:1921456]
ENSMUSG00000036928	148.498	0.519772	0.182797	2.84343	0.00446304	0.0509671	187.939	171.264	154.11	171.788	172.545	89.7323	88.7451	144.172	156.184	Stag3	50878	stromal antigen 3 [Source:MGI Symbol;Acc:MGI:1355311]
ENSMUSG00000038486	2218.33	0.174392	0.0613021	2.8448	0.00444398	0.0509671	2323.7	2568.09	2278.7	2225.01	2284.17	1908.36	2011.56	2247.64	2117.75	Sv2a	64051	synaptic vesicle glycoprotein 2 a [Source:MGI Symbol;Acc:MGI:1927139]
ENSMUSG00000043987	666.722	0.188054	0.0661345	2.84351	0.00446199	0.0509671	753.683	672.08	717.409	708.331	673.747	588.675	621.216	604.446	660.915	Cep164	214552	centrosomal protein 164 [Source:MGI Symbol;Acc:MGI:2384878]
ENSMUSG00000064210	967.918	0.187249	0.0658238	2.8447	0.0044453	0.0509671	1032.22	1031.04	1011.81	1053.08	988.71	949.151	970.28	797.868	877.102	Ano6	105722	anoctamin 6 [Source:MGI Symbol;Acc:MGI:2145890]
ENSMUSG00000024248	1307.16	-0.219809	0.0773137	-2.84308	0.00446799	0.0509769	1181.61	1227.39	1282.83	1143.68	1254.37	1323.55	1245.39	1604.69	1500.96	Cox7a2l	20463	cytochrome c oxidase subunit 7A2 like [Source:MGI Symbol;Acc:MGI:106015]
ENSMUSG00000017837	1424.15	-0.163769	0.057619	-2.84228	0.00447927	0.0510588	1274.13	1319.94	1326.41	1377.83	1462.52	1525.45	1401.19	1571.56	1558.31	Nkiras2	71966	NFKB inhibitor interacting Ras-like protein 2 [Source:MGI Symbol;Acc:MGI:1919216]
ENSMUSG00000044340	1514.72	0.123763	0.0435537	2.84162	0.00448843	0.0511164	1542.06	1562.13	1570.86	1569.62	1617.72	1503.02	1416.96	1447.98	1402.13	Phlpp1	98432	PH domain and leucine rich repeat protein phosphatase 1 [Source:MGI Symbol;Acc:MGI:2138327]
ENSMUSG00000026587	1947.11	0.182996	0.0644553	2.83912	0.0045238	0.0513949	1884.21	2310.33	2043.82	2030.86	2007.55	1694.86	1909.01	1868.86	1774.5	Astn1	11899	astrotactin 1 [Source:MGI Symbol;Acc:MGI:1098567]
ENSMUSG00000031295	606.117	0.18118	0.0638104	2.83934	0.00452065	0.0513949	671.761	621.911	645.137	623.613	634.49	532.979	586.704	555.195	583.264	Phka2	110094	phosphorylase kinase alpha 2 [Source:MGI Symbol;Acc:MGI:97577]
ENSMUSG00000103310	56.6537	0.587606	0.206975	2.83902	0.00452526	0.0513949	64.5739	82.1719	73.3352	54.1249	58.4279	47.1868	38.4562	49.2511	42.355	Pcdha12	192164	protocadherin alpha 12 [Source:MGI Symbol;Acc:MGI:1298370]
ENSMUSG00000022639	121.93	0.487149	0.171617	2.83858	0.00453141	0.0514179	156.134	141.855	147.733	134.136	118.682	79.6761	80.8566	124.471	113.829	Dubr	NA	Dppa2 upstream binding RNA [Source:MGI Symbol;Acc:MGI:1915440]
ENSMUSG00000040822	460.966	-0.256029	0.09021	-2.83814	0.00453774	0.0514283	488.641	421.239	388.995	380.051	440.948	488.113	503.875	484.452	552.38	1700123O20Rik	58248	RIKEN cDNA 1700123O20 gene [Source:MGI Symbol;Acc:MGI:1920893]
ENSMUSG00000044231	115.887	-0.393161	0.138538	-2.83794	0.00454059	0.0514283	120.474	93.4165	95.6546	103.543	95.8583	130.731	123.257	143.276	136.771	Nhlrc1	105193	NHL repeat containing 1 [Source:MGI Symbol;Acc:MGI:2145264]
ENSMUSG00000026960	864.452	-0.163133	0.0575353	-2.83535	0.00457755	0.0517999	887.65	797.5	775.865	815.404	827.12	936.001	931.823	891.893	916.81	Arl6ip6	65103	ADP-ribosylation factor-like 6 interacting protein 6 [Source:MGI Symbol;Acc:MGI:1929507]
ENSMUSG00000025404	2396.62	0.124812	0.0440479	2.83356	0.00460329	0.0520439	2533.8	2469.48	2343.54	2526.22	2568.09	2360.89	2339.91	2222.57	2205.11	R3hdm2	71750	R3H domain containing 2 [Source:MGI Symbol;Acc:MGI:1919000]
ENSMUSG00000023966	262.142	-0.31681	0.111828	-2.83301	0.00461125	0.0520866	204.323	234.406	250.828	224.736	267.49	291.63	261.305	290.134	334.428	Rsph9	75564	radial spoke head 9 homolog (Chlamydomonas) [Source:MGI Symbol;Acc:MGI:1922814]
ENSMUSG00000030036	779.635	-0.185329	0.0654381	-2.83213	0.00462394	0.0521827	796.09	683.324	752.483	722.45	722.132	893.456	798.706	829.21	818.864	Mogs	57377	mannosyl-oligosaccharide glucosidase [Source:MGI Symbol;Acc:MGI:1929872]
ENSMUSG00000023064	2367.45	-0.206104	0.0727923	-2.8314	0.00463443	0.0522538	2022.03	2057.76	2391.36	2263.83	2348.07	2492.39	2267.93	2707.92	2755.72	Sncg	20618	synuclein, gamma [Source:MGI Symbol;Acc:MGI:1298397]
ENSMUSG00000005682	2053.44	0.160529	0.0567048	2.83097	0.00464075	0.0522777	2247.56	1918.5	2159.67	2260.3	2187.39	1926.15	1985.92	1833.93	1961.57	Pan2	103135	PAN2 poly(A) specific ribonuclease subunit [Source:MGI Symbol;Acc:MGI:1918984]
ENSMUSG00000005774	246.709	0.266744	0.0942407	2.83045	0.00464828	0.0523152	283.354	265.545	251.89	280.038	252.883	214.275	218.905	237.301	216.187	Rfx5	53970	regulatory factor X, 5 (influences HLA class II expression) [Source:MGI Symbol;Acc:MGI:1858421]
ENSMUSG00000032238	1517.47	-0.167576	0.0592234	-2.82956	0.00466119	0.0524131	1474.6	1469.58	1474.14	1331.94	1440.61	1525.45	1585.58	1782.89	1572.43	Rora	19883	RAR-related orphan receptor alpha [Source:MGI Symbol;Acc:MGI:104661]
ENSMUSG00000039640	790.935	-0.244235	0.0863279	-2.82916	0.00466705	0.0524318	646.703	708.408	770.551	711.86	817.991	853.231	759.264	908.012	942.4	Mrpl12	NA	mitochondrial ribosomal protein L12 [Source:MGI Symbol;Acc:MGI:1926273]
ENSMUSG00000033705	254.312	0.362117	0.128056	2.8278	0.00468684	0.0526066	292.028	298.414	303.969	264.741	250.144	181.012	263.277	195.214	240.012	Stard9	668880	START domain containing 9 [Source:MGI Symbol;Acc:MGI:3045258]
ENSMUSG00000001056	585.256	-0.256657	0.090787	-2.82703	0.00469821	0.0526868	469.365	545.794	539.917	555.369	583.366	622.711	557.122	688.62	705.035	Nhp2	52530	NHP2 ribonucleoprotein [Source:MGI Symbol;Acc:MGI:1098547]
ENSMUSG00000021760	357.245	-0.297239	0.105195	-2.82561	0.00471906	0.0528729	282.39	281.114	352.859	354.165	351.48	358.156	426.962	409.232	398.843	Gpx8	69590	glutathione peroxidase 8 (putative) [Source:MGI Symbol;Acc:MGI:1916840]
ENSMUSG00000027808	1905.05	-0.145163	0.0513808	-2.82523	0.00472463	0.0528879	1694.34	1773.18	1849.32	1823.77	1956.42	1956.32	1974.09	2104.37	2013.63	Serp1	28146	stress-associated endoplasmic reticulum protein 1 [Source:MGI Symbol;Acc:MGI:92638]
ENSMUSG00000063888	1317.17	-0.158434	0.0561006	-2.8241	0.00474139	0.0529328	1283.77	1242.96	1364.67	1170.75	1201.42	1440.36	1352.87	1429.18	1368.6	Rpl7l1	66229	ribosomal protein L7-like 1 [Source:MGI Symbol;Acc:MGI:1913479]
ENSMUSG00000078517	931.849	0.179573	0.0635811	2.82432	0.00473814	0.0529328	988.848	1035.37	1010.75	920.124	958.583	913.568	917.033	801.45	840.924	Emc1	230866	ER membrane protein complex subunit 1 [Source:MGI Symbol;Acc:MGI:2443696]
ENSMUSG00000098332	187.081	-0.320017	0.113296	-2.82462	0.00473365	0.0529328	186.975	169.534	140.293	172.964	172.545	222.784	206.086	213.123	199.422	2310009A05Rik	66364	RIKEN cDNA 2310009A05 gene [Source:MGI Symbol;Acc:MGI:1913614]
ENSMUSG00000067786	14529.3	0.134123	0.0475139	2.82281	0.0047604	0.0530975	14041.4	15837.6	16129.5	15405.6	14219	14037.7	13521.8	13817.2	13753.9	Nnat	18111	neuronatin [Source:MGI Symbol;Acc:MGI:104716]
ENSMUSG00000036062	787.486	0.29586	0.104848	2.8218	0.00477549	0.0532181	859.7	1019.8	835.383	807.167	768.692	805.27	738.556	591.014	661.798	Phf24	230085	PHD finger protein 24 [Source:MGI Symbol;Acc:MGI:2140712]
ENSMUSG00000005899	1234.69	0.169082	0.0599463	2.82056	0.00479394	0.0533759	1162.33	1345.02	1300.9	1281.35	1402.27	1180.44	1154.67	1136.36	1148.88	Smpd4	77626	sphingomyelin phosphodiesterase 4 [Source:MGI Symbol;Acc:MGI:1924876]
ENSMUSG00000037805	2733.84	-0.184597	0.0654997	-2.81828	0.00482813	0.0537086	2306.35	2670.15	2767.61	2527.4	2616.47	2859.83	2657.42	3053.57	3145.74	Rpl10a	19896	ribosomal protein L10A [Source:MGI Symbol;Acc:MGI:1343877]
ENSMUSG00000004633	466.184	0.20882	0.0741267	2.81707	0.00484638	0.0538635	517.555	462.758	530.351	494.184	474.727	415.399	453.586	422.664	424.433	Chn2	69993	chimerin 2 [Source:MGI Symbol;Acc:MGI:1917243]
ENSMUSG00000020098	176.543	-0.348867	0.123866	-2.81648	0.00485528	0.0539143	135.894	151.369	162.613	160.022	177.11	181.012	184.393	220.287	216.187	Pcbd1	13180	pterin 4 alpha carbinolamine dehydratase/dimerization cofactor of hepatocyte nuclear factor 1 alpha (TCF1) 1 [Source:MGI Symbol;Acc:MGI:94873]
ENSMUSG00000020808	1245.8	-0.188921	0.0671349	-2.81405	0.00489214	0.054228	1281.84	1121	1192.49	1122.5	1148.47	1486.77	1251.31	1290.38	1317.42	Pimreg	109212	PICALM interacting mitotic regulator [Source:MGI Symbol;Acc:MGI:1924434]
ENSMUSG00000072623	361.672	0.217202	0.0771851	2.81405	0.00489223	0.054228	360.457	390.1	391.121	392.994	393.475	337.27	345.12	326.848	317.663	Zfp9	22750	zinc finger protein 9 [Source:MGI Symbol;Acc:MGI:99210]
ENSMUSG00000000416	448.426	0.383517	0.136324	2.81328	0.00490386	0.0542539	416.357	685.919	447.451	477.711	472.901	380.589	414.144	392.218	348.547	Cttnbp2	30785	cortactin binding protein 2 [Source:MGI Symbol;Acc:MGI:1353467]
ENSMUSG00000023075	675.083	-0.17565	0.0624415	-2.81304	0.00490763	0.0542539	630.318	654.78	656.828	594.198	652.749	697.746	766.166	701.157	721.801	Akirin1	NA	akirin 1 [Source:MGI Symbol;Acc:MGI:1915300]
ENSMUSG00000064043	549.566	0.224163	0.0796725	2.81355	0.00489975	0.0542539	577.31	555.309	542.043	645.969	615.319	506.678	547.261	462.065	494.142	Trerf1	NA	transcriptional regulating factor 1 [Source:MGI Symbol;Acc:MGI:2442086]
ENSMUSG00000066456	1343.61	-0.165546	0.0588555	-2.81275	0.00491199	0.054254	1180.64	1198.84	1389.12	1333.12	1275.37	1425.66	1381.47	1444.4	1463.9	Hmgn3	94353	high mobility group nucleosomal binding domain 3 [Source:MGI Symbol;Acc:MGI:2138069]
ENSMUSG00000024604	1373.95	0.137818	0.0490396	2.81033	0.004949	0.0545662	1431.23	1414.22	1376.36	1442.55	1496.3	1374.61	1300.61	1259.93	1269.77	Rbm22	66810	RNA binding motif protein 22 [Source:MGI Symbol;Acc:MGI:1914060]
ENSMUSG00000042613	825.569	0.163484	0.0581726	2.81033	0.00494902	0.0545662	941.622	833.828	839.634	870.705	849.03	782.064	772.082	758.468	782.686	Pbxip1	229534	pre B cell leukemia transcription factor interacting protein 1 [Source:MGI Symbol;Acc:MGI:2441670]
ENSMUSG00000035236	1570.21	0.149913	0.0533605	2.80944	0.00496285	0.0546282	1559.41	1666.79	1659.08	1666.11	1659.72	1499.92	1522.47	1550.96	1347.42	Scai	320271	suppressor of cancer cell invasion [Source:MGI Symbol;Acc:MGI:2443716]
ENSMUSG00000053641	1741.36	0.187821	0.0668544	2.8094	0.00496341	0.0546282	1994.08	1806.05	1983.24	1668.46	1753.75	1660.82	1659.53	1668.27	1478.01	Dennd4a	102442	DENN/MADD domain containing 4A [Source:MGI Symbol;Acc:MGI:2142979]
ENSMUSG00000035150	1401.25	-0.315984	0.112529	-2.80801	0.0049849	0.0548163	1105.47	1088.13	1126.6	1435.49	1562.95	1368.42	1637.84	1653.94	1632.43	Eif2s3x	26905	eukaryotic translation initiation factor 2, subunit 3, structural gene X-linked [Source:MGI Symbol;Acc:MGI:1349431]
ENSMUSG00000027253	1149.85	0.228031	0.0812348	2.80706	0.00499965	0.05493	1261.6	1056.99	1226.5	1230.75	1373.06	972.358	993.945	1153.37	1080.05	Lrp4	228357	low density lipoprotein receptor-related protein 4 [Source:MGI Symbol;Acc:MGI:2442252]
ENSMUSG00000026123	1601.66	-0.225335	0.080316	-2.8056	0.00502226	0.0550152	1745.42	1358	1389.12	1450.78	1506.34	1834.87	1552.05	1766.77	1811.56	Plekhb2	226971	pleckstrin homology domain containing, family B (evectins) member 2 [Source:MGI Symbol;Acc:MGI:2385825]
ENSMUSG00000032586	476.867	0.221114	0.0788016	2.80596	0.00501676	0.0550152	510.808	486.977	520.786	497.714	529.503	463.359	438.795	382.368	461.493	Traip	22036	TRAF-interacting protein [Source:MGI Symbol;Acc:MGI:1096377]
ENSMUSG00000036199	988.088	-0.153988	0.0548896	-2.80542	0.00502507	0.0550152	865.483	951.464	961.86	944.833	981.406	1036.56	1022.54	1047.71	1080.94	Ndufa13	67184	NADH:ubiquinone oxidoreductase subunit A13 [Source:MGI Symbol;Acc:MGI:1914434]
ENSMUSG00000038811	2380.28	-0.470617	0.167731	-2.80577	0.0050196	0.0550152	1720.36	1926.28	2119.28	2009.68	2384.59	2739.93	1955.35	3161.03	3406.05	Gngt2	14710	guanine nucleotide binding protein (G protein), gamma transducing activity polypeptide 2 [Source:MGI Symbol;Acc:MGI:893584]
ENSMUSG00000032536	754.761	0.293491	0.104693	2.80334	0.00505769	0.0553238	728.625	1019.8	695.09	850.703	814.339	625.032	673.477	693.993	691.799	Trak1	67095	trafficking protein, kinesin binding 1 [Source:MGI Symbol;Acc:MGI:1914345]
ENSMUSG00000030527	427.203	0.249766	0.0891525	2.80156	0.00508561	0.0555443	400.936	505.141	442.137	483.594	467.423	405.343	350.05	394.009	396.196	Crtc3	70461	CREB regulated transcription coactivator 3 [Source:MGI Symbol;Acc:MGI:1917711]
ENSMUSG00000041977	1460.54	0.143673	0.0512898	2.8012	0.00509122	0.0555443	1588.32	1479.09	1553.86	1487.26	1515.47	1332.06	1317.37	1394.25	1477.13	Arhgef11	213498	Rho guanine nucleotide exchange factor (GEF) 11 [Source:MGI Symbol;Acc:MGI:2441869]
ENSMUSG00000049536	284.588	-0.279661	0.0998261	-2.80148	0.00508685	0.0555443	282.39	258.625	280.587	240.032	238.276	327.214	284.97	345.653	303.544	Tceal1	237052	transcription elongation factor A (SII)-like 1 [Source:MGI Symbol;Acc:MGI:2385317]
ENSMUSG00000085334	603.237	0.30324	0.10835	2.7987	0.00513095	0.0559287	637.065	653.915	649.388	713.037	641.794	651.333	569.941	440.574	472.082	Gm12940	NA	predicted gene 12940 [Source:MGI Symbol;Acc:MGI:3702626]
ENSMUSG00000027652	1905.8	0.143615	0.0513668	2.79587	0.00517605	0.0563218	2081.78	2004.13	1990.68	1900.26	1968.29	1800.84	1918.87	1823.19	1664.2	Ralgapb	228850	Ral GTPase activating protein, beta subunit (non-catalytic) [Source:MGI Symbol;Acc:MGI:2444531]
ENSMUSG00000031012	1904.05	0.148473	0.0531018	2.796	0.00517387	0.0563218	1883.24	2161.55	1966.23	1977.91	1960.99	1725.8	1840.97	1882.29	1737.44	Cask	12361	calcium/calmodulin-dependent serine protein kinase (MAGUK family) [Source:MGI Symbol;Acc:MGI:1309489]
ENSMUSG00000020658	1452.93	0.188431	0.0674223	2.79479	0.0051933	0.0564015	1365.69	1739.45	1504.97	1540.21	1531.91	1397.04	1328.22	1307.39	1361.54	Efr3b	668212	EFR3 homolog B [Source:MGI Symbol;Acc:MGI:2444851]
ENSMUSG00000028779	713.365	-0.173564	0.0621078	-2.79457	0.00519696	0.0564015	699.711	646.131	682.336	640.086	706.612	770.46	738.556	734.29	802.099	Pef1	67898	penta-EF hand domain containing 1 [Source:MGI Symbol;Acc:MGI:1915148]
ENSMUSG00000039756	1159.53	-0.203103	0.0726736	-2.79472	0.00519439	0.0564015	983.065	1104.56	1161.67	1097.79	1086.39	1182.76	1131.99	1373.66	1313.89	Dnttip2	99480	deoxynucleotidyltransferase, terminal, interacting protein 2 [Source:MGI Symbol;Acc:MGI:1923173]
ENSMUSG00000064326	627.935	-0.275387	0.0985726	-2.79375	0.00521007	0.0564946	512.736	568.284	550.545	602.434	638.142	691.558	581.773	703.844	802.099	Siva1	NA	SIVA1, apoptosis-inducing factor [Source:MGI Symbol;Acc:MGI:1353606]
ENSMUSG00000022822	1742.33	0.135857	0.0486485	2.79263	0.00522816	0.0566414	1819.63	1961.75	1746.23	1797.89	1746.45	1656.95	1674.32	1604.69	1673.02	Abcc5	27416	ATP-binding cassette, sub-family C (CFTR/MRP), member 5 [Source:MGI Symbol;Acc:MGI:1351644]
ENSMUSG00000046591	778.035	0.195242	0.0699319	2.79189	0.00524006	0.0567211	855.845	772.416	832.195	797.754	863.637	758.857	776.026	659.965	685.622	Ticrr	77011	TOPBP1-interacting checkpoint and replication regulator [Source:MGI Symbol;Acc:MGI:1924261]
ENSMUSG00000022428	795.93	-0.199782	0.0715976	-2.79034	0.00526521	0.0567922	748.864	764.631	768.425	691.858	759.563	876.437	748.417	891.893	913.281	Cby1	73739	chibby family member 1, beta catenin antagonist [Source:MGI Symbol;Acc:MGI:1920989]
ENSMUSG00000025283	897.44	0.224462	0.0804403	2.79042	0.00526405	0.0567922	1041.86	929.84	994.807	908.357	921.152	877.211	693.198	876.67	833.865	Sat1	20229	spermidine/spermine N1-acetyl transferase 1 [Source:MGI Symbol;Acc:MGI:98233]
ENSMUSG00000055692	221.192	0.325338	0.116582	2.79064	0.00526038	0.0567922	224.563	264.68	233.822	256.505	234.625	183.332	222.849	163.872	206.481	Tmem191c	NA	transmembrane protein 191C [Source:MGI Symbol;Acc:MGI:107238]
ENSMUSG00000060743	4318.29	-0.143425	0.0514052	-2.79008	0.00526942	0.0567922	4029.6	3897.54	4253.44	4205.27	4250.63	4645.2	4205.53	4906.31	4471.1	H3f3a	NA	H3.3 histone A [Source:MGI Symbol;Acc:MGI:1097686]
ENSMUSG00000066491	107.115	-0.423328	0.151705	-2.79047	0.00526313	0.0567922	84.8134	96.0114	86.0891	104.72	94.0324	126.863	105.508	147.753	118.241	Cox6c2	NA	cytochrome c oxidase subunit 6C2 [Source:MGI Symbol;Acc:MGI:3649160]
ENSMUSG00000069072	105.1	0.480342	0.172204	2.78938	0.00528091	0.0568668	109.872	144.45	99.9059	127.076	118.682	68.8464	105.508	85.9656	85.5925	Slc7a14	241919	solute carrier family 7 (cationic amino acid transporter, y+ system), member 14 [Source:MGI Symbol;Acc:MGI:3040688]
ENSMUSG00000009647	310.14	0.229413	0.0822958	2.78766	0.005309	0.0571199	329.616	332.147	306.095	347.106	344.177	284.668	282.998	282.97	281.485	Mcu	215999	mitochondrial calcium uniporter [Source:MGI Symbol;Acc:MGI:3026965]
ENSMUSG00000028176	86.6969	0.740777	0.265835	2.78661	0.00532624	0.0572559	103.125	181.643	91.4032	69.4211	81.2513	55.6959	67.0518	66.2652	64.415	Lrrc7	242274	leucine rich repeat containing 7 [Source:MGI Symbol;Acc:MGI:2676665]
ENSMUSG00000020307	662.309	-0.196542	0.0705666	-2.78519	0.00534959	0.0574574	637.065	572.608	672.77	610.67	618.971	748.801	676.435	675.188	748.272	Cdc34	216150	cell division cycle 34 [Source:MGI Symbol;Acc:MGI:102657]
ENSMUSG00000057278	800.531	-0.247733	0.0889804	-2.78412	0.00536724	0.0575973	657.304	747.332	875.771	748.336	668.269	893.456	809.552	863.238	941.517	Snrpg	NA	small nuclear ribonucleoprotein polypeptide G [Source:MGI Symbol;Acc:MGI:1915261]
ENSMUSG00000024099	1853.28	-0.17396	0.0625152	-2.78268	0.00539115	0.0577544	1694.34	1820.76	1869.52	1742.59	1641.46	1957.87	1776.87	2095.41	2080.69	Ndufv2	72900	NADH:ubiquinone oxidoreductase core subunit V2 [Source:MGI Symbol;Acc:MGI:1920150]
ENSMUSG00000031441	1454.97	0.164421	0.0590853	2.78277	0.00538973	0.0577544	1554.59	1434.12	1464.58	1483.73	1701.71	1325.1	1388.37	1394.25	1348.3	Atp11a	50770	ATPase, class VI, type 11A [Source:MGI Symbol;Acc:MGI:1354735]
ENSMUSG00000000131	2106.06	0.156917	0.0564155	2.78144	0.0054118	0.0579258	2121.3	2119.17	2166.04	2285.01	2344.42	2025.94	2122.98	1820.5	1949.21	Xpo6	74204	exportin 6 [Source:MGI Symbol;Acc:MGI:2429950]
ENSMUSG00000037111	643.477	0.284147	0.102172	2.78105	0.00541826	0.0579452	812.474	704.948	657.891	683.621	634.49	539.168	692.212	521.167	545.321	Setd7	73251	SET domain containing (lysine methyltransferase) 7 [Source:MGI Symbol;Acc:MGI:1920501]
ENSMUSG00000008348	1299.26	0.537306	0.193386	2.77841	0.00546253	0.0583443	1330.03	1684.09	1579.36	1459.02	1485.35	788.252	776.026	1239.34	1351.83	Ubc	22190	ubiquitin C [Source:MGI Symbol;Acc:MGI:98889]
ENSMUSG00000042121	762.524	0.181953	0.0654914	2.77827	0.00546495	0.0583443	781.633	791.445	772.676	829.523	849.03	665.257	677.421	729.812	765.92	Ssh1	231637	slingshot protein phosphatase 1 [Source:MGI Symbol;Acc:MGI:2686240]
ENSMUSG00000033904	2604.44	0.158946	0.0572525	2.77623	0.00549931	0.0586609	2939.56	2551.65	2828.19	2590.94	2745.2	2540.35	2493.74	2502.85	2247.46	Ccp110	101565	centriolar coiled coil protein 110 [Source:MGI Symbol;Acc:MGI:2141942]
ENSMUSG00000092035	611.81	0.223275	0.0804507	2.7753	0.005515	0.0587779	675.616	653.915	639.823	591.844	705.699	627.353	563.038	531.912	517.084	Peg10	170676	paternally expressed 10 [Source:MGI Symbol;Acc:MGI:2157785]
ENSMUSG00000028634	163.287	0.622332	0.224473	2.77242	0.00556417	0.0592513	159.989	322.633	147.733	145.902	189.891	126.863	124.243	118.203	134.124	Hivep3	16656	human immunodeficiency virus type I enhancer binding protein 3 [Source:MGI Symbol;Acc:MGI:106589]
ENSMUSG00000026305	1938.66	0.174612	0.0630504	2.76941	0.00561582	0.0597503	2212.86	2090.63	2132.03	1894.37	1881.56	1950.13	1740.39	1784.68	1761.26	Lrrfip1	16978	leucine rich repeat (in FLII) interacting protein 1 [Source:MGI Symbol;Acc:MGI:1342770]
ENSMUSG00000000740	4027.48	-0.168566	0.0609011	-2.76786	0.00564261	0.0599328	3381.94	3773.85	3800.67	4135.85	3995.92	4163.27	4049.73	4436.18	4509.93	Rpl13	270106	ribosomal protein L13 [Source:MGI Symbol;Acc:MGI:105922]
ENSMUSG00000022048	2397.67	0.159894	0.0577637	2.76807	0.00563899	0.0599328	2501.03	2812.01	2453.01	2456.8	2349.9	2304.42	2313.29	2261.07	2127.46	Dpysl2	12934	dihydropyrimidinase-like 2 [Source:MGI Symbol;Acc:MGI:1349763]
ENSMUSG00000002308	382.721	-0.249797	0.0902787	-2.76695	0.00565829	0.0600482	378.769	366.746	344.356	330.633	345.09	454.85	374.701	394.905	454.434	Cd320	54219	CD320 antigen [Source:MGI Symbol;Acc:MGI:1860083]
ENSMUSG00000004383	1078.92	0.148043	0.0535168	2.76628	0.00566995	0.0600828	1168.11	1185.01	1070.27	1093.09	1120.17	992.47	992.959	1056.66	1031.52	Large1	16795	LARGE xylosyl- and glucuronyltransferase 1 [Source:MGI Symbol;Acc:MGI:1342270]
ENSMUSG00000028409	1842.01	-0.129581	0.046849	-2.76593	0.00567602	0.0600828	1760.84	1732.53	1862.08	1726.11	1760.14	1885.93	1839.98	1991.54	2018.92	Smu1	NA	smu-1 suppressor of mec-8 and unc-52 homolog (C. elegans) [Source:MGI Symbol;Acc:MGI:1915546]
ENSMUSG00000039976	3351.94	0.195482	0.0706682	2.7662	0.00567137	0.0600828	3365.55	4203.74	3449.94	3366.34	3371.47	2932.55	3069.59	3221.92	3186.33	Tbc1d16	207592	TBC1 domain family, member 16 [Source:MGI Symbol;Acc:MGI:2652878]
ENSMUSG00000025020	606.092	0.197203	0.0713521	2.76379	0.00571336	0.0604267	583.092	708.408	614.315	651.852	654.575	567.789	552.192	556.986	565.616	Slit1	20562	slit guidance ligand 1 [Source:MGI Symbol;Acc:MGI:1315203]
ENSMUSG00000020485	536.623	-0.211053	0.0763826	-2.7631	0.00572547	0.0605035	481.895	516.385	533.54	509.48	467.423	563.148	527.54	613.401	616.795	Supt4a	20922	SPT4A, DSIF elongation factor subunit [Source:MGI Symbol;Acc:MGI:107416]
ENSMUSG00000060166	534.222	0.269857	0.0977191	2.76155	0.0057527	0.0607333	662.123	577.798	504.844	565.958	578.801	515.187	531.484	422.664	449.14	Zdhhc8	27801	zinc finger, DHHC domain containing 8 [Source:MGI Symbol;Acc:MGI:1338012]
ENSMUSG00000060206	2367.14	0.15971	0.0578384	2.76131	0.00575696	0.0607333	2660.06	2598.36	2558.23	2252.07	2342.59	2251.04	2318.22	2169.74	2153.93	Zfp462	242466	zinc finger protein 462 [Source:MGI Symbol;Acc:MGI:107690]
ENSMUSG00000026825	1182.4	0.195409	0.0707885	2.76047	0.00577188	0.0607364	1206.66	1362.32	1090.46	1307.23	1298.19	1164.2	1047.19	1084.42	1080.94	Dnm1	13429	dynamin 1 [Source:MGI Symbol;Acc:MGI:107384]
ENSMUSG00000051234	1310.97	-0.16189	0.0586412	-2.76069	0.00576801	0.0607364	1153.66	1206.63	1304.09	1236.64	1324.67	1310.4	1389.35	1404.11	1469.19	Rnf7	19823	ring finger protein 7 [Source:MGI Symbol;Acc:MGI:1337096]
ENSMUSG00000074405	786.173	0.164186	0.0594689	2.76087	0.00576471	0.0607364	855.845	818.259	840.697	785.988	828.033	781.29	726.724	693.098	745.625	Zfp865	319748	zinc finger protein 865 [Source:MGI Symbol;Acc:MGI:2442656]
ENSMUSG00000024346	741.447	-0.179452	0.0650217	-2.75988	0.00578234	0.0607439	638.992	694.569	762.048	727.157	680.137	775.875	782.929	789.809	821.511	Pfdn1	67199	prefoldin 1 [Source:MGI Symbol;Acc:MGI:1914449]
ENSMUSG00000038542	755.67	0.152976	0.0554241	2.7601	0.00577837	0.0607439	797.054	798.365	789.682	802.461	769.605	741.839	683.337	711.007	707.682	Pcid2	NA	PCI domain containing 2 [Source:MGI Symbol;Acc:MGI:2443003]
ENSMUSG00000025525	378.766	-0.243615	0.0882819	-2.75951	0.00578876	0.0607601	367.204	308.793	386.87	354.165	335.047	396.06	398.367	442.365	420.021	Apool	68117	apolipoprotein O-like [Source:MGI Symbol;Acc:MGI:1915367]
ENSMUSG00000021188	1092.47	0.143274	0.0519312	2.75891	0.00579944	0.0607727	1182.57	1134.84	1152.11	1098.97	1132.04	990.923	1009.72	1095.17	1035.93	Trip11	109181	thyroid hormone receptor interactor 11 [Source:MGI Symbol;Acc:MGI:1924393]
ENSMUSG00000026648	245.342	0.334024	0.121072	2.75889	0.00579973	0.0607727	294.919	288.034	300.78	245.915	221.843	242.123	201.156	205.064	208.246	Dclre1c	227525	DNA cross-link repair 1C [Source:MGI Symbol;Acc:MGI:2441769]
ENSMUSG00000021364	1846.06	-0.1726	0.0626512	-2.75493	0.00587046	0.0614622	1672.17	1708.31	1802.56	1707.29	1847.78	1986.49	1739.4	2033.62	2116.87	Elovl2	54326	elongation of very long chain fatty acids (FEN1/Elo2, SUR4/Elo3, yeast)-like 2 [Source:MGI Symbol;Acc:MGI:1858960]
ENSMUSG00000037112	456.735	0.226484	0.0822435	2.75383	0.00589028	0.0616179	509.844	492.166	501.655	441.236	493.898	395.286	467.391	421.769	387.372	Sik2	235344	salt inducible kinase 2 [Source:MGI Symbol;Acc:MGI:2445031]
ENSMUSG00000004567	595.653	0.226019	0.0820839	2.75351	0.00589603	0.0616264	612.006	627.101	609.001	688.328	648.184	517.508	483.168	559.672	615.913	Mcoln1	94178	mucolipin 1 [Source:MGI Symbol;Acc:MGI:1890498]
ENSMUSG00000042743	531.72	-0.206151	0.0748773	-2.75318	0.00590197	0.0616367	537.794	521.575	503.781	464.768	459.207	573.204	609.383	572.209	543.556	Sgtb	218544	small glutamine-rich tetratricopeptide repeat (TPR)-containing, beta [Source:MGI Symbol;Acc:MGI:2444615]
ENSMUSG00000011171	607.995	0.258893	0.094046	2.75284	0.00590812	0.0616464	633.209	611.532	786.493	614.2	634.49	512.093	518.666	546.24	615.031	Vipr2	22355	vasoactive intestinal peptide receptor 2 [Source:MGI Symbol;Acc:MGI:107166]
ENSMUSG00000022801	1206.1	0.147427	0.0535649	2.75231	0.00591774	0.0616464	1346.41	1269.77	1209.5	1208.4	1266.24	1157.24	1191.16	1099.64	1106.53	Lrch3	70144	leucine-rich repeats and calponin homology (CH) domain containing 3 [Source:MGI Symbol;Acc:MGI:1917394]
ENSMUSG00000060904	1104.17	-0.157585	0.0572544	-2.75236	0.00591676	0.0616464	966.68	1070.83	1084.09	1073.09	1058.09	1154.92	1099.45	1228.59	1201.82	Arl1	104303	ADP-ribosylation factor-like 1 [Source:MGI Symbol;Acc:MGI:99436]
ENSMUSG00000029603	2459.14	0.115639	0.0420234	2.75177	0.00592741	0.0616955	2488.5	2582.79	2529.53	2647.41	2486.84	2366.3	2217.64	2400.77	2412.47	Dtx1	14357	deltex 1, E3 ubiquitin ligase [Source:MGI Symbol;Acc:MGI:1352744]
ENSMUSG00000020894	3358.71	0.125129	0.0454818	2.75119	0.00593798	0.061754	3479.28	3637.19	3183.17	3595.78	3541.28	3258.21	3191.87	3131.48	3210.16	Vamp2	22318	vesicle-associated membrane protein 2 [Source:MGI Symbol;Acc:MGI:1313277]
ENSMUSG00000022263	2302.73	0.190717	0.0693516	2.74999	0.00595966	0.0618762	2561.75	2639.02	2380.74	2143.82	2453.97	1920.74	2268.92	2184.96	2170.7	Trio	223435	triple functional domain (PTPRF interacting) [Source:MGI Symbol;Acc:MGI:1927230]
ENSMUSG00000030469	260.221	-0.357636	0.130048	-2.75003	0.00595893	0.0618762	294.919	198.078	199.812	214.146	249.231	300.139	280.04	322.371	283.249	Zfp719	210105	zinc finger protein 719 [Source:MGI Symbol;Acc:MGI:2444708]
ENSMUSG00000021241	598.27	-0.201408	0.0732568	-2.74934	0.00597147	0.0619471	535.867	524.17	611.126	595.374	541.371	657.521	595.578	652.801	670.622	Isca2	74316	iron-sulfur cluster assembly 2 [Source:MGI Symbol;Acc:MGI:1921566]
ENSMUSG00000022748	187.226	-0.294444	0.107137	-2.74829	0.00599061	0.0620271	164.808	179.913	162.613	182.377	161.59	218.916	197.211	197.005	220.599	Cmss1	66497	cms small ribosomal subunit 1 [Source:MGI Symbol;Acc:MGI:1913747]
ENSMUSG00000022946	592.217	0.202564	0.0737522	2.74655	0.00602254	0.0620271	598.513	698.029	589.87	597.727	657.314	529.111	555.15	568.627	535.615	Dop1b	70028	DOP1 leucine zipper like protein B [Source:MGI Symbol;Acc:MGI:1917278]
ENSMUSG00000029101	1804.15	0.109926	0.0400135	2.74723	0.00601014	0.0620271	1808.07	1924.55	1858.89	1847.31	1884.3	1703.37	1708.84	1740.8	1761.26	Rgs12	71729	regulator of G-protein signaling 12 [Source:MGI Symbol;Acc:MGI:1918979]
ENSMUSG00000031392	977.251	0.16635	0.060549	2.74736	0.00600766	0.0620271	972.463	987.793	990.556	1110.74	1074.53	929.813	953.517	878.461	897.397	Irak1	16179	interleukin-1 receptor-associated kinase 1 [Source:MGI Symbol;Acc:MGI:107420]
ENSMUSG00000032481	4675	0.107014	0.0389638	2.7465	0.00602355	0.0620271	4963.51	4785.86	4967.66	4567.67	4854.08	4490.48	4667.01	4334.1	4444.63	Smarcc1	20588	SWI/SNF related, matrix associated, actin dependent regulator of chromatin, subfamily c, member 1 [Source:MGI Symbol;Acc:MGI:1203524]
ENSMUSG00000038593	677.986	0.186992	0.0680842	2.74648	0.00602387	0.0620271	751.756	681.594	691.901	717.744	741.304	676.087	648.825	581.163	611.501	Tctn1	NA	tectonic family member 1 [Source:MGI Symbol;Acc:MGI:3603820]
ENSMUSG00000039844	3519.88	0.123095	0.0448193	2.74647	0.00602398	0.0620271	3390.61	3885.43	3643.38	3600.48	3740.3	3266.72	3367.38	3375.05	3409.58	Rapgef1	107746	Rap guanine nucleotide exchange factor (GEF) 1 [Source:MGI Symbol;Acc:MGI:104580]
ENSMUSG00000042506	5824.05	0.130455	0.0474946	2.74673	0.00601934	0.0620271	5996.7	6636.03	5845.56	5687.82	6112.11	5455.88	5702.36	5522.4	5457.62	Usp22	216825	ubiquitin specific peptidase 22 [Source:MGI Symbol;Acc:MGI:2144157]
ENSMUSG00000092341	17784.9	0.215245	0.0783591	2.74691	0.00601604	0.0620271	16041.3	18775.8	21138.6	20871	17936.5	14704.5	16517.4	16999.7	17079.7	Malat1	72289	metastasis associated lung adenocarcinoma transcript 1 (non-coding RNA) [Source:MGI Symbol;Acc:MGI:1919539]
ENSMUSG00000025574	848.916	0.193601	0.0704991	2.74614	0.00603001	0.0620379	771.995	930.705	919.347	917.77	955.844	782.837	769.124	778.168	814.452	Tk1	21877	thymidine kinase 1 [Source:MGI Symbol;Acc:MGI:98763]
ENSMUSG00000045294	2198.95	0.23286	0.0848168	2.74545	0.00604282	0.0621184	2004.68	2351.85	2627.31	2419.15	2372.72	1845.7	1802.51	2211.82	2154.81	Insig1	231070	insulin induced gene 1 [Source:MGI Symbol;Acc:MGI:1916289]
ENSMUSG00000022142	1743.76	0.14196	0.0517139	2.7451	0.00604929	0.0621337	1910.23	1718.69	1941.79	1754.35	1772.92	1652.31	1710.81	1608.27	1624.49	Nup155	NA	nucleoporin 155 [Source:MGI Symbol;Acc:MGI:2181182]
ENSMUSG00000027447	2240.12	-0.212246	0.0773347	-2.74452	0.00606	0.0621924	1826.38	2139.06	2147.98	2017.92	2331.64	2324.53	2186.09	2527.03	2660.43	Cst3	13010	cystatin C [Source:MGI Symbol;Acc:MGI:102519]
ENSMUSG00000028187	598.333	-0.186202	0.0678865	-2.74284	0.006091	0.0624591	549.36	572.608	618.566	553.016	526.764	655.201	621.216	662.652	625.619	Rpf1	70285	ribosome production factor 1 homolog [Source:MGI Symbol;Acc:MGI:1917535]
ENSMUSG00000029430	5044.47	-0.110657	0.0403669	-2.74129	0.00611983	0.0627031	4670.52	4776.35	5221.68	4959.49	4735.4	5315.09	5246.81	5316.44	5158.49	Ran	19384	RAN, member RAS oncogene family [Source:MGI Symbol;Acc:MGI:1333112]
ENSMUSG00000031834	1418.67	0.177721	0.064878	2.7393	0.00615693	0.0629279	1586.4	1671.12	1384.87	1430.78	1403.18	1325.87	1325.26	1300.23	1340.36	Pik3r2	18709	phosphoinositide-3-kinase regulatory subunit 2 [Source:MGI Symbol;Acc:MGI:1098772]
ENSMUSG00000037152	577.979	-0.222042	0.0810459	-2.7397	0.00614945	0.0629279	484.786	538.01	580.304	589.491	499.376	574.751	647.839	653.697	633.561	Ndufc1	66377	NADH:ubiquinone oxidoreductase subunit C1 [Source:MGI Symbol;Acc:MGI:1913627]
ENSMUSG00000046079	775.242	0.158175	0.0577417	2.73935	0.00615606	0.0629279	762.357	837.288	793.933	837.76	831.685	719.406	751.375	709.216	734.154	Lrrc8d	231549	leucine rich repeat containing 8D [Source:MGI Symbol;Acc:MGI:1922368]
ENSMUSG00000036372	703.462	-0.193244	0.0705618	-2.73865	0.00616916	0.0630013	616.825	636.616	706.781	675.385	672.834	737.971	689.254	793.391	802.099	Tmem258	69038	transmembrane protein 258 [Source:MGI Symbol;Acc:MGI:1916288]
ENSMUSG00000039278	744.958	0.206626	0.0754694	2.73788	0.00618374	0.0630984	742.118	891.781	715.284	825.993	784.212	693.878	647.839	699.366	704.153	Pcsk1n	30052	proprotein convertase subtilisin/kexin type 1 inhibitor [Source:MGI Symbol;Acc:MGI:1353431]
ENSMUSG00000029389	560.35	0.213673	0.0780982	2.73595	0.00621996	0.0634161	509.844	628.831	605.812	607.14	632.665	524.47	517.68	496.093	520.614	Ddx55	67848	DEAD (Asp-Glu-Ala-Asp) box polypeptide 55 [Source:MGI Symbol;Acc:MGI:1915098]
ENSMUSG00000063160	1027.54	0.147373	0.0538852	2.73494	0.00623925	0.0635608	1108.36	1127.92	1054.33	1051.91	1026.14	976.226	960.419	932.19	1010.34	Numbl	18223	numb-like [Source:MGI Symbol;Acc:MGI:894702]
ENSMUSG00000022710	3850.82	0.0984469	0.0360003	2.73461	0.00624535	0.063571	3905.27	4133.68	3983.48	3939.35	3870.85	3685.21	3834.77	3702.79	3601.94	Usp7	252870	ubiquitin specific peptidase 7 [Source:MGI Symbol;Acc:MGI:2182061]
ENSMUSG00000068115	638.945	-0.239672	0.0876561	-2.73423	0.00625269	0.0635937	671.761	573.473	576.053	550.662	586.105	769.687	603.467	692.202	727.095	Ninl	78177	ninein-like [Source:MGI Symbol;Acc:MGI:1925427]
ENSMUSG00000093930	8099.17	0.112563	0.0411834	2.7332	0.0062722	0.06374	7976.32	8632.37	8595.09	8402.31	8289.46	8172.6	7708.99	7788.84	7326.54	Hmgcs1	208715	3-hydroxy-3-methylglutaryl-Coenzyme A synthase 1 [Source:MGI Symbol;Acc:MGI:107592]
ENSMUSG00000009731	90.3536	0.399776	0.146323	2.73215	0.00629228	0.0637594	93.4875	102.066	100.969	105.897	104.075	78.9026	73.9542	80.5928	73.2389	Kcnd1	NA	potassium voltage-gated channel, Shal-related family, member 1 [Source:MGI Symbol;Acc:MGI:96671]
ENSMUSG00000021448	55.0154	0.803956	0.29428	2.73194	0.00629624	0.0637594	87.7048	95.1464	54.2043	42.3586	59.3408	36.3571	55.2192	26.8643	37.9431	Shc3	NA	src homology 2 domain-containing transforming protein C3 [Source:MGI Symbol;Acc:MGI:106179]
ENSMUSG00000023021	828.606	0.176876	0.064753	2.73155	0.00630368	0.0637594	793.198	941.084	906.593	895.415	830.772	772.781	785.887	777.272	754.449	Cers5	71949	ceramide synthase 5 [Source:MGI Symbol;Acc:MGI:1919199]
ENSMUSG00000039298	1995.03	0.148744	0.0544416	2.73218	0.00629172	0.0637594	2264.9	2011.05	2160.73	1963.79	2026.72	1834.87	1990.85	1859.01	1843.33	Cdk5rap2	214444	CDK5 regulatory subunit associated protein 2 [Source:MGI Symbol;Acc:MGI:2384875]
ENSMUSG00000061175	416.725	0.225155	0.0824292	2.73149	0.00630481	0.0637594	439.488	487.842	435.76	449.472	412.647	351.194	398.367	371.622	404.138	Fnip2	329679	folliculin interacting protein 2 [Source:MGI Symbol;Acc:MGI:2683054]
ENSMUSG00000079104	355.52	-0.245955	0.0900342	-2.7318	0.00629896	0.0637594	372.986	313.118	332.665	291.804	330.483	404.569	408.227	376.1	369.724	Prps1l3	NA	phosphoribosyl pyrophosphate synthetase 1-like 3 [Source:MGI Symbol;Acc:MGI:3779453]
ENSMUSG00000032815	569.51	0.279379	0.102327	2.73025	0.00632855	0.0639476	756.574	518.98	615.378	575.371	623.535	540.715	494.014	509.525	491.495	Fanca	14087	Fanconi anemia, complementation group A [Source:MGI Symbol;Acc:MGI:1341823]
ENSMUSG00000092981	81.045	0.544701	0.199573	2.72933	0.00634634	0.0640754	88.6686	83.9018	95.6546	111.78	92.2065	77.3555	50.2889	49.2511	80.2981	Mir5125	NA	microRNA 5125 [Source:MGI Symbol;Acc:MGI:4950450]
ENSMUSG00000009863	1454.67	-0.176012	0.0645104	-2.72843	0.00636366	0.0641429	1300.15	1435.85	1371.05	1368.42	1401.36	1501.47	1387.38	1675.43	1650.96	Sdhb	67680	succinate dehydrogenase complex, subunit B, iron sulfur (Ip) [Source:MGI Symbol;Acc:MGI:1914930]
ENSMUSG00000028631	92.851	0.585374	0.214566	2.72818	0.00636847	0.0641429	105.053	166.074	92.4661	94.1303	86.7289	75.0348	72.9682	77.9063	65.2974	Kcnq4	60613	potassium voltage-gated channel, subfamily Q, member 4 [Source:MGI Symbol;Acc:MGI:1926803]
ENSMUSG00000052557	629.491	0.217601	0.0797546	2.72838	0.00636458	0.0641429	681.399	707.543	653.639	602.434	708.438	552.318	617.271	521.167	621.207	Gan	NA	giant axonal neuropathy [Source:MGI Symbol;Acc:MGI:1890619]
ENSMUSG00000037032	3811.33	-0.155041	0.0568381	-2.72776	0.00637658	0.0641727	3803.11	3715.9	3660.38	3465.17	3498.37	4168.69	3580.37	4161.27	4248.74	Apbb1	11785	amyloid beta (A4) precursor protein-binding, family B, member 1 [Source:MGI Symbol;Acc:MGI:107765]
ENSMUSG00000014554	290.838	-0.255444	0.0936829	-2.72669	0.00639731	0.064255	291.064	243.921	292.278	248.269	263.838	332.628	320.468	325.058	300.015	Dguok	27369	deoxyguanosine kinase [Source:MGI Symbol;Acc:MGI:1351602]
ENSMUSG00000018567	1942.59	-0.151936	0.0557249	-2.72654	0.00640023	0.064255	1730.97	1852.76	1794.05	1847.31	2031.28	2160.54	1989.86	1981.69	2094.81	Gabarap	NA	gamma-aminobutyric acid receptor associated protein [Source:MGI Symbol;Acc:MGI:1861742]
ENSMUSG00000036560	617.811	0.227726	0.0835175	2.72668	0.00639743	0.064255	683.326	593.368	654.702	665.972	708.438	641.277	513.735	544.449	555.028	Lgi4	243914	leucine-rich repeat LGI family, member 4 [Source:MGI Symbol;Acc:MGI:2180197]
ENSMUSG00000070822	258.857	0.248449	0.0911488	2.72575	0.0064156	0.0643575	285.282	256.03	275.273	282.391	293.052	225.878	242.57	228.346	240.894	Zscan18	232875	zinc finger and SCAN domain containing 18 [Source:MGI Symbol;Acc:MGI:3643810]
ENSMUSG00000039860	783.416	0.211808	0.0777447	2.72441	0.00644161	0.0645664	845.243	864.967	856.64	860.116	745.869	785.931	640.937	690.411	760.626	Srrm3	58212	serine/arginine repetitive matrix 3 [Source:MGI Symbol;Acc:MGI:1920309]
ENSMUSG00000050288	563.997	-0.220473	0.0809563	-2.72336	0.00646223	0.064721	565.744	451.513	495.278	551.839	564.194	625.806	598.536	608.028	615.031	Fzd2	57265	frizzled class receptor 2 [Source:MGI Symbol;Acc:MGI:1888513]
ENSMUSG00000084067	110.021	-0.468946	0.172216	-2.72301	0.00646894	0.0647362	71.3204	115.041	109.471	81.1874	92.2065	126.863	136.076	145.962	112.064	Gm14269	NA	predicted gene 14269 [Source:MGI Symbol;Acc:MGI:3650060]
ENSMUSG00000004263	2997.19	0.158131	0.0581078	2.72133	0.00650189	0.0648575	3089.91	3158	2963.17	3338.1	3163.32	3047.03	2941.41	2574.49	2699.25	Atn1	13498	atrophin 1 [Source:MGI Symbol;Acc:MGI:104725]
ENSMUSG00000016319	2058.44	0.132043	0.0485191	2.72147	0.00649916	0.0648575	2039.38	2224.7	2157.54	2168.53	2118.01	2015.88	2051.98	1917.21	1832.74	Slc25a5	11740	solute carrier family 25 (mitochondrial carrier, adenine nucleotide translocator), member 5 [Source:MGI Symbol;Acc:MGI:1353496]
ENSMUSG00000024593	1139.34	0.176311	0.0647826	2.72157	0.00649718	0.0648575	1093.9	1225.66	1187.18	1224.87	1270.81	1013.36	1080.72	1156.06	1001.52	Megf10	70417	multiple EGF-like-domains 10 [Source:MGI Symbol;Acc:MGI:2685177]
ENSMUSG00000034040	389.135	0.233633	0.0858507	2.72138	0.00650094	0.0648575	384.552	427.294	395.372	453.002	424.515	339.59	328.357	388.636	360.9	Galnt17	NA	polypeptide N-acetylgalactosaminyltransferase 17 [Source:MGI Symbol;Acc:MGI:2137594]
ENSMUSG00000013822	824.24	-0.167251	0.0614956	-2.71972	0.00653363	0.0650613	794.162	757.711	815.189	757.749	784.212	881.852	803.636	888.311	935.341	Elof1	66126	ELF1 homolog, elongation factor 1 [Source:MGI Symbol;Acc:MGI:1913376]
ENSMUSG00000034424	800.662	-0.212018	0.0779621	-2.7195	0.00653798	0.0650613	616.825	762.901	770.551	809.521	781.473	868.702	870.688	860.552	864.749	Gcsh	NA	glycine cleavage system protein H (aminomethyl carrier) [Source:MGI Symbol;Acc:MGI:1915383]
ENSMUSG00000105572	476.838	0.44842	0.164866	2.7199	0.00653016	0.0650613	315.159	599.422	611.126	577.725	602.538	422.361	349.064	402.068	412.079	Gm43300	NA	predicted gene 43300 [Source:MGI Symbol;Acc:MGI:5663437]
ENSMUSG00000039809	860.495	0.213411	0.0784855	2.71911	0.00654572	0.0650863	847.171	993.847	903.404	873.059	963.147	724.821	749.403	893.684	795.922	Gabbr2	242425	gamma-aminobutyric acid (GABA) B receptor, 2 [Source:MGI Symbol;Acc:MGI:2386030]
ENSMUSG00000025938	716.219	0.263658	0.096985	2.71854	0.00655706	0.0651471	845.243	839.883	844.949	694.211	643.62	683.049	672.491	632.206	590.323	Slco5a1	240726	solute carrier organic anion transporter family, member 5A1 [Source:MGI Symbol;Acc:MGI:2443431]
ENSMUSG00000031558	1368.97	0.291643	0.107321	2.71748	0.00657817	0.0653047	1239.43	1468.71	1451.82	1674.34	1615.9	1155.69	1504.72	1128.3	1081.82	Slit2	20563	slit guidance ligand 2 [Source:MGI Symbol;Acc:MGI:1315205]
ENSMUSG00000003039	1693.21	-0.147801	0.0544092	-2.71646	0.00659836	0.0653934	1500.62	1729.07	1596.37	1655.52	1597.64	1779.95	1682.21	1832.14	1865.39	Fam32a	67922	family with sequence similarity 32, member A [Source:MGI Symbol;Acc:MGI:1915172]
ENSMUSG00000025907	1560.95	-0.148987	0.0548487	-2.71632	0.0066012	0.0653934	1609.53	1460.93	1526.22	1426.07	1420.53	1561.03	1660.52	1732.74	1650.96	Rb1cc1	12421	RB1-inducible coiled-coil 1 [Source:MGI Symbol;Acc:MGI:1341850]
ENSMUSG00000042272	1624.74	0.16273	0.0599102	2.71624	0.00660284	0.0653934	1674.1	1904.66	1753.67	1614.33	1579.38	1509.98	1512.61	1546.49	1527.43	Sestd1	228071	SEC14 and spectrin domains 1 [Source:MGI Symbol;Acc:MGI:1916262]
ENSMUSG00000026930	2155.86	0.118218	0.0435324	2.71564	0.00661477	0.0654594	2341.04	2292.16	2229.81	2182.65	2124.4	2109.48	2031.28	2007.66	2084.22	Gpsm1	67839	G-protein signalling modulator 1 (AGS3-like, C. elegans) [Source:MGI Symbol;Acc:MGI:1915089]
ENSMUSG00000025060	2144	0.154691	0.0569782	2.71492	0.00662923	0.0655505	2070.22	2101.01	2281.89	2372.08	2402.85	1926.15	2062.83	2027.36	2051.57	Slk	20874	STE20-like kinase [Source:MGI Symbol;Acc:MGI:103241]
ENSMUSG00000021040	429.067	-0.267231	0.0984465	-2.71448	0.00663804	0.0655855	336.362	429.889	434.697	396.524	369.739	430.87	460.488	526.539	476.494	Slirp	NA	SRA stem-loop interacting RNA binding protein [Source:MGI Symbol;Acc:MGI:1916394]
ENSMUSG00000071337	5332.57	0.141595	0.0521906	2.71304	0.00666692	0.0658187	5965.85	5303.98	5549.03	5656.05	5346.15	5342.94	5124.54	5076.45	4628.17	Tia1	21841	cytotoxic granule-associated RNA binding protein 1 [Source:MGI Symbol;Acc:MGI:107914]
ENSMUSG00000033981	1604.91	0.543096	0.2002	2.71277	0.00667236	0.0658202	1663.5	2842.28	1650.57	1714.35	1453.39	1327.42	1282.86	1286.8	1223	Gria2	14800	glutamate receptor, ionotropic, AMPA2 (alpha 2) [Source:MGI Symbol;Acc:MGI:95809]
ENSMUSG00000029673	1206.39	0.292329	0.107867	2.71008	0.00672661	0.0663029	1106.43	1629.6	1209.5	1331.94	1289.07	1177.35	1168.48	989.5	955.636	Auts2	NA	autism susceptibility candidate 2 [Source:MGI Symbol;Acc:MGI:1919847]
ENSMUSG00000026005	554.39	-0.184154	0.0679747	-2.70916	0.00674548	0.0664363	533.939	481.787	552.671	534.189	513.07	593.316	583.745	622.355	574.44	Rpe	66646	ribulose-5-phosphate-3-epimerase [Source:MGI Symbol;Acc:MGI:1913896]
ENSMUSG00000026074	7797.8	0.134775	0.0497586	2.70858	0.00675709	0.0664981	8102.58	8699.84	8486.69	7885.77	7421.26	7199.47	7666.59	7469.16	7248.89	Map4k4	26921	mitogen-activated protein kinase kinase kinase kinase 4 [Source:MGI Symbol;Acc:MGI:1349394]
ENSMUSG00000025204	883.045	-0.214045	0.0790741	-2.7069	0.00679156	0.0667845	776.814	858.048	832.195	778.928	876.418	987.056	812.511	989.5	1035.93	Ndufb8	67264	NADH:ubiquinone oxidoreductase subunit B8 [Source:MGI Symbol;Acc:MGI:1914514]
ENSMUSG00000022555	500.587	0.182332	0.0674034	2.70508	0.00682874	0.0670554	507.917	543.199	523.974	548.309	520.373	491.207	455.558	462.961	451.787	Dgat1	13350	diacylglycerol O-acyltransferase 1 [Source:MGI Symbol;Acc:MGI:1333825]
ENSMUSG00000031226	782.799	-0.295174	0.109121	-2.70503	0.00682987	0.0670554	576.346	631.426	715.284	888.355	745.869	808.365	870.688	902.639	906.221	Pbdc1	67683	polysaccharide biosynthesis domain containing 1 [Source:MGI Symbol;Acc:MGI:1914933]
ENSMUSG00000031231	1029.66	-0.18606	0.0688117	-2.70391	0.00685292	0.0672287	870.302	1037.1	1052.2	981.308	911.11	1064.41	1066.91	1147.1	1136.53	Cox7b	NA	cytochrome c oxidase subunit 7B [Source:MGI Symbol;Acc:MGI:1913392]
ENSMUSG00000027601	693.556	-0.207124	0.0766817	-2.70109	0.00691134	0.0675331	738.262	607.207	669.582	604.787	624.448	741.839	797.72	754.886	703.27	Mtfr1	67472	mitochondrial fission regulator 1 [Source:MGI Symbol;Acc:MGI:1914722]
ENSMUSG00000028433	1763.65	0.164903	0.0610363	2.70172	0.0068982	0.0675331	1976.73	1844.11	1728.16	1836.72	1876.08	1732.76	1780.82	1529.47	1568.02	Ubap2	68926	ubiquitin-associated protein 2 [Source:MGI Symbol;Acc:MGI:1916176]
ENSMUSG00000028567	958.366	-0.150428	0.0556828	-2.70152	0.00690229	0.0675331	970.536	867.562	917.221	915.417	900.155	1040.43	966.335	999.35	1048.29	Txndc12	66073	thioredoxin domain containing 12 (endoplasmic reticulum) [Source:MGI Symbol;Acc:MGI:1913323]
ENSMUSG00000040761	2609.29	0.137026	0.0507175	2.70174	0.00689767	0.0675331	2801.74	2723.78	2812.24	2489.75	2763.46	2513.28	2604.18	2335.4	2439.83	Spen	56381	spen family transcription repressor [Source:MGI Symbol;Acc:MGI:1891706]
ENSMUSG00000044627	2158.08	-0.1288	0.0476823	-2.70121	0.00690881	0.0675331	1973.84	2011.05	2173.48	2063.81	2139.01	2183.74	2188.06	2342.56	2347.18	Swi5	72931	SWI5 recombination repair homolog (yeast) [Source:MGI Symbol;Acc:MGI:1920181]
ENSMUSG00000107331	127.999	0.347552	0.128683	2.70084	0.00691647	0.0675331	131.075	138.395	145.607	155.315	137.853	111.392	98.6057	114.621	119.124	Gm42732	NA	predicted gene 42732 [Source:MGI Symbol;Acc:MGI:5662869]
ENSMUSG00000042903	944.882	-0.213099	0.0789192	-2.70021	0.00692953	0.0676077	1013.91	773.281	929.975	876.588	819.816	992.47	1002.82	1045.92	1049.17	Foxo4	54601	forkhead box O4 [Source:MGI Symbol;Acc:MGI:1891915]
ENSMUSG00000030269	866.255	-0.209509	0.0776431	-2.69836	0.00696818	0.0678257	889.577	818.259	801.373	749.513	790.602	901.965	828.287	996.664	1020.05	Mtmr14	97287	myotubularin related protein 14 [Source:MGI Symbol;Acc:MGI:1916075]
ENSMUSG00000037243	456.82	0.220991	0.0818984	2.69836	0.00696821	0.0678257	520.446	452.378	494.215	483.594	489.334	469.548	396.395	411.919	393.549	Zfp692	103836	zinc finger protein 692 [Source:MGI Symbol;Acc:MGI:2144276]
ENSMUSG00000039771	699.69	-0.160751	0.0595725	-2.69841	0.00696707	0.0678257	647.666	672.08	711.032	656.559	638.142	748.027	720.807	736.976	765.92	Polr2j	20022	polymerase (RNA) II (DNA directed) polypeptide J [Source:MGI Symbol;Acc:MGI:109582]
ENSMUSG00000022840	904.275	0.151698	0.0562731	2.69575	0.00702309	0.0683065	1006.2	954.059	926.786	928.36	913.849	827.703	897.311	826.524	857.69	Adcy5	224129	adenylate cyclase 5 [Source:MGI Symbol;Acc:MGI:99673]
ENSMUSG00000019302	3074.69	0.136158	0.0505255	2.69483	0.00704253	0.0684422	3188.21	3417.49	2927.03	3211.02	3270.14	3013	2770.82	2928.2	2946.32	Atp6v0a1	11975	ATPase, H+ transporting, lysosomal V0 subunit A1 [Source:MGI Symbol;Acc:MGI:103286]
ENSMUSG00000039137	670.707	0.224881	0.0834665	2.69426	0.00705443	0.0684511	745.009	677.269	748.231	745.983	667.356	540.715	589.662	625.042	697.093	Whrn	73750	whirlin [Source:MGI Symbol;Acc:MGI:2682003]
ENSMUSG00000063077	7112.21	0.144572	0.053654	2.69452	0.00704904	0.0684511	7783.56	8071.87	7023.17	6931.52	7319.01	6337.73	6959.59	6878.15	6705.33	Kif1b	16561	kinesin family member 1B [Source:MGI Symbol;Acc:MGI:108426]
ENSMUSG00000008373	1549.8	-0.135076	0.0501698	-2.69239	0.00709429	0.0687842	1436.05	1434.98	1555.98	1493.14	1507.26	1635.29	1574.73	1574.25	1736.56	Prpf31	68988	pre-mRNA processing factor 31 [Source:MGI Symbol;Acc:MGI:1916238]
ENSMUSG00000025184	427.344	-0.269995	0.100292	-2.69209	0.00710066	0.0687924	477.076	362.421	383.681	381.228	354.219	516.734	452.6	453.11	465.023	R3hcc1l	52013	R3H domain and coiled-coil containing 1 like [Source:MGI Symbol;Acc:MGI:1196316]
ENSMUSG00000024856	368.886	-0.277489	0.103107	-2.69128	0.00711787	0.0688521	375.878	309.658	352.859	300.04	347.829	460.265	365.827	377.891	429.727	Cdk2ap2	52004	CDK2-associated protein 2 [Source:MGI Symbol;Acc:MGI:1098779]
ENSMUSG00000051355	374.6	-0.304612	0.113177	-2.69147	0.00711381	0.0688521	306.485	332.147	376.241	328.279	353.306	399.154	338.217	454.901	482.671	Commd1	17846	COMM domain containing 1 [Source:MGI Symbol;Acc:MGI:109474]
ENSMUSG00000080316	752.192	0.25957	0.0965068	2.68965	0.00715264	0.0691348	945.477	759.441	787.556	809.521	755.911	724.821	771.096	601.759	614.148	Spaca6	75202	sperm acrosome associated 6 [Source:MGI Symbol;Acc:MGI:1922452]
ENSMUSG00000078851	251.401	-0.327949	0.121968	-2.68881	0.00717062	0.0692548	225.527	217.972	211.503	256.505	218.192	248.311	243.556	331.326	309.721	H2aw	NA	H2A.W histone [Source:MGI Symbol;Acc:MGI:2448458]
ENSMUSG00000032383	3376.68	-0.147616	0.0549105	-2.6883	0.00718168	0.0693079	3021.48	3049.87	3357.48	3291.03	3394.3	3481	3332.87	3663.39	3798.72	Ppib	19035	peptidylprolyl isomerase B [Source:MGI Symbol;Acc:MGI:97750]
ENSMUSG00000003153	399.954	0.395795	0.147331	2.68644	0.00722184	0.0694803	608.151	493.896	420.88	358.872	356.045	353.514	336.245	334.908	337.076	Slc2a3	20527	solute carrier family 2 (facilitated glucose transporter), member 3 [Source:MGI Symbol;Acc:MGI:95757]
ENSMUSG00000027223	2753.25	0.141246	0.0525774	2.68645	0.0072216	0.0694803	2721.74	3034.31	2632.63	2989.81	2982.56	2598.37	2524.3	2613.89	2681.6	Mapk8ip1	19099	mitogen-activated protein kinase 8 interacting protein 1 [Source:MGI Symbol;Acc:MGI:1309464]
ENSMUSG00000044894	1178.96	-0.197122	0.0733676	-2.68677	0.00721457	0.0694803	1030.29	1088.99	1126.6	1070.73	1218.77	1304.99	1112.27	1283.22	1374.77	Uqcrq	22272	ubiquinol-cytochrome c reductase, complex III subunit VII [Source:MGI Symbol;Acc:MGI:107807]
ENSMUSG00000087260	580.796	-0.206457	0.0768421	-2.68676	0.00721482	0.0694803	514.663	535.415	581.367	521.247	565.107	583.26	583.745	680.561	661.798	Lamtor5	68576	late endosomal/lysosomal adaptor, MAPK and MTOR activator 5 [Source:MGI Symbol;Acc:MGI:1915826]
ENSMUSG00000001517	2522.33	0.212615	0.0791798	2.68521	0.00724833	0.0696812	2816.19	2402.88	2564.61	2768.61	2878.49	2592.95	2471.06	2042.58	2163.64	Foxm1	14235	forkhead box M1 [Source:MGI Symbol;Acc:MGI:1347487]
ENSMUSG00000038319	789.884	0.168095	0.0626177	2.68446	0.00726466	0.0697845	847.171	792.31	786.493	895.415	831.685	736.424	784.901	710.112	724.448	Kcnh2	16511	potassium voltage-gated channel, subfamily H (eag-related), member 2 [Source:MGI Symbol;Acc:MGI:1341722]
ENSMUSG00000052914	362.528	0.237614	0.0885241	2.68417	0.00727096	0.0697911	384.552	380.586	441.074	364.755	372.478	311.742	335.259	357.295	315.016	Cyp2j6	13110	cytochrome P450, family 2, subfamily j, polypeptide 6 [Source:MGI Symbol;Acc:MGI:1270148]
ENSMUSG00000031161	1443.33	0.115384	0.0430067	2.68292	0.00729826	0.0699722	1506.4	1499.85	1453.95	1496.67	1514.56	1404	1401.19	1326.2	1387.13	Hdac6	15185	histone deacetylase 6 [Source:MGI Symbol;Acc:MGI:1333752]
ENSMUSG00000100691	259.673	-0.338779	0.126278	-2.68279	0.00730106	0.0699722	202.396	225.756	230.634	245.915	257.448	267.65	240.598	333.117	333.546	2010320M18Rik	NA	RIKEN cDNA 2010320M18 gene [Source:MGI Symbol;Acc:MGI:1919343]
ENSMUSG00000068617	113.31	-0.513975	0.191652	-2.68181	0.00732243	0.0701231	88.6686	87.3617	78.6493	109.426	111.378	94.3737	165.657	130.739	153.537	Efcab1	66793	EF-hand calcium binding domain 1 [Source:MGI Symbol;Acc:MGI:1914043]
ENSMUSG00000097709	151.478	0.408355	0.152299	2.68126	0.00733451	0.0701849	155.17	137.53	182.806	195.32	180.761	130.731	119.313	154.022	107.652	2810429I04Rik	73270	RIKEN cDNA 2810429I04 gene [Source:MGI Symbol;Acc:MGI:1924187]
ENSMUSG00000040249	3649.73	0.19476	0.0726589	2.68047	0.00735197	0.0702979	3823.35	4234.88	3463.76	3760.51	4047.04	3174.67	3864.36	3232.67	3246.34	Lrp1	16971	low density lipoprotein receptor-related protein 1 [Source:MGI Symbol;Acc:MGI:96828]
ENSMUSG00000016624	1184.98	0.181123	0.0676083	2.679	0.00738419	0.0705519	1271.24	1169.44	1190.37	1326.06	1299.11	1229.95	1027.47	1079.05	1072.11	Phf21b	271305	PHD finger protein 21B [Source:MGI Symbol;Acc:MGI:2443812]
ENSMUSG00000037217	768.996	0.21349	0.0797362	2.67745	0.00741852	0.0708255	873.193	920.325	703.592	774.222	821.642	711.67	719.821	702.053	694.446	Syn1	20964	synapsin I [Source:MGI Symbol;Acc:MGI:98460]
ENSMUSG00000028582	631.866	0.204719	0.0765123	2.67563	0.00745885	0.0711561	655.377	660.835	656.828	720.097	662.791	523.696	629.104	548.031	630.031	Cc2d1b	319965	coiled-coil and C2 domain containing 1B [Source:MGI Symbol;Acc:MGI:2443076]
ENSMUSG00000068882	4810.85	-0.142503	0.0532767	-2.67477	0.00747794	0.0712836	4457.52	4469.29	5130.27	4665.33	4274.37	5052.86	4955.92	5244.8	5047.31	Ssb	20823	Sjogren syndrome antigen B [Source:MGI Symbol;Acc:MGI:98423]
ENSMUSG00000026077	69.377	0.512165	0.19151	2.67435	0.00748733	0.0713185	81.9221	97.7413	76.5236	75.3042	68.4702	66.5257	60.1494	47.4602	50.2966	Npas2	18143	neuronal PAS domain protein 2 [Source:MGI Symbol;Acc:MGI:109232]
ENSMUSG00000021981	562.41	-0.170489	0.0637596	-2.67394	0.00749661	0.0713524	547.432	526.765	511.22	518.893	558.717	607.24	582.759	589.223	619.443	Cab39l	69008	calcium binding protein 39-like [Source:MGI Symbol;Acc:MGI:1914081]
ENSMUSG00000016534	1673.29	-0.14791	0.0553603	-2.67178	0.0075451	0.0716522	1561.34	1570.78	1633.57	1601.39	1614.07	1615.18	1885.34	1862.59	1715.38	Lamp2	16784	lysosomal-associated membrane protein 2 [Source:MGI Symbol;Acc:MGI:96748]
ENSMUSG00000038462	1780.14	-0.145362	0.0544068	-2.67176	0.00754536	0.0716522	1618.2	1651.22	1743.04	1759.06	1730.93	1824.04	1742.36	2001.39	1950.98	Uqcrfs1	66694	ubiquinol-cytochrome c reductase, Rieske iron-sulfur polypeptide 1 [Source:MGI Symbol;Acc:MGI:1913944]
ENSMUSG00000052033	369.627	-0.22002	0.0823441	-2.67196	0.00754104	0.0716522	365.276	347.717	362.424	317.69	328.657	393.739	376.674	403.859	430.61	Pfdn4	NA	prefoldin 4 [Source:MGI Symbol;Acc:MGI:1923512]
ENSMUSG00000053420	167.126	-0.35348	0.132343	-2.67093	0.00756412	0.0717756	153.242	131.475	150.922	138.842	169.806	198.03	154.811	196.109	210.893	Gm4792	NA	predicted gene 4792 [Source:MGI Symbol;Acc:MGI:3648918]
ENSMUSG00000030079	731.498	-0.165191	0.0618579	-2.6705	0.00757394	0.0718141	705.494	692.839	729.1	674.208	670.095	834.665	771.096	767.422	738.566	Ruvbl1	56505	RuvB-like protein 1 [Source:MGI Symbol;Acc:MGI:1928760]
ENSMUSG00000035725	658.887	0.161462	0.0604895	2.66926	0.00760182	0.0720236	693.928	690.244	675.959	689.504	707.525	648.239	637.979	589.223	597.383	Prkx	19108	protein kinase, X-linked [Source:MGI Symbol;Acc:MGI:1309999]
ENSMUSG00000018566	160.444	0.329394	0.123467	2.66788	0.00763326	0.0721569	147.46	179.048	176.43	184.731	194.455	132.278	139.034	137.903	152.655	Slc2a4	20528	solute carrier family 2 (facilitated glucose transporter), member 4 [Source:MGI Symbol;Acc:MGI:95758]
ENSMUSG00000020392	1097.66	-0.209901	0.0786721	-2.66805	0.00762934	0.0721569	1051.49	943.679	950.169	1087.21	1099.17	1094.58	1088.61	1316.35	1247.71	Cdkn2aipnl	52626	CDKN2A interacting protein N-terminal like [Source:MGI Symbol;Acc:MGI:1261797]
ENSMUSG00000021948	630.127	0.17826	0.0668137	2.66801	0.00763014	0.0721569	637.065	656.51	647.263	711.86	671.008	615.749	608.397	543.553	579.735	Prkcd	18753	protein kinase C, delta [Source:MGI Symbol;Acc:MGI:97598]
ENSMUSG00000023919	509.676	-0.20063	0.0752185	-2.66729	0.00764649	0.0722271	503.098	472.272	515.472	443.589	455.555	536.847	512.749	570.418	577.087	Cenpq	NA	centromere protein Q [Source:MGI Symbol;Acc:MGI:1933744]
ENSMUSG00000025386	370.857	-0.442937	0.166113	-2.66648	0.00766506	0.0723477	351.783	242.191	284.838	349.459	371.565	433.191	298.775	481.766	524.144	Pde6g	18588	phosphodiesterase 6G, cGMP-specific, rod, gamma [Source:MGI Symbol;Acc:MGI:97526]
ENSMUSG00000018501	5117.33	0.0986697	0.0370084	2.66614	0.00767276	0.072352	5491.67	5312.63	5240.81	5045.38	5264.9	4750.4	5067.34	5015.56	4867.3	Ncor1	20185	nuclear receptor co-repressor 1 [Source:MGI Symbol;Acc:MGI:1349717]
ENSMUSG00000073664	904.202	0.238282	0.0893798	2.66595	0.00767712	0.072352	1079.44	886.591	855.577	994.251	1032.53	824.609	900.27	849.806	714.741	Nbeal1	269198	neurobeachin like 1 [Source:MGI Symbol;Acc:MGI:2444343]
ENSMUSG00000020431	3237.49	0.214155	0.0803697	2.66463	0.00770734	0.072527	3345.31	4029.88	3257.57	3182.78	3426.25	2676.5	2848.72	3351.76	3018.68	Adcy1	432530	adenylate cyclase 1 [Source:MGI Symbol;Acc:MGI:99677]
ENSMUSG00000024847	468.998	-0.231524	0.0868826	-2.66479	0.00770364	0.072527	450.09	443.728	383.681	437.706	461.033	499.716	451.614	552.508	540.909	Aip	11632	aryl-hydrocarbon receptor-interacting protein [Source:MGI Symbol;Acc:MGI:109622]
ENSMUSG00000003279	513.119	0.355085	0.133281	2.66417	0.00771784	0.072532	528.156	775.876	535.666	530.66	469.249	421.587	489.084	450.424	417.374	Dlgap1	224997	DLG associated protein 1 [Source:MGI Symbol;Acc:MGI:1346065]
ENSMUSG00000022456	4861.92	0.201554	0.0756557	2.6641	0.00771951	0.072532	4797.74	6270.15	5061.19	4946.55	4727.18	4449.49	4591.08	4465.73	4448.16	Sept3	24050	septin 3 [Source:MGI Symbol;Acc:MGI:1345148]
ENSMUSG00000043162	214.35	-0.281874	0.105824	-2.66362	0.00773047	0.0725802	215.889	174.723	191.309	191.79	204.498	229.746	219.891	248.942	252.365	Pyurf	NA	Pigy upstream reading frame [Source:MGI Symbol;Acc:MGI:1913709]
ENSMUSG00000001855	1126.1	0.161444	0.0606274	2.66289	0.00774716	0.0725877	1240.4	1082.94	1158.48	1175.45	1250.72	1062.86	1123.12	1022.63	1018.29	Nup214	227720	nucleoporin 214 [Source:MGI Symbol;Acc:MGI:1095411]
ENSMUSG00000042772	2075.99	0.135779	0.0509904	2.66283	0.00774875	0.0725877	2233.1	2129.55	2119.28	2126.17	2202	2029.03	2117.06	1843.78	1883.92	Smg7	226517	Smg-7 homolog, nonsense mediated mRNA decay factor (C. elegans) [Source:MGI Symbol;Acc:MGI:2682334]
ENSMUSG00000062866	1106.57	0.148468	0.0557458	2.66331	0.00773761	0.0725877	1077.52	1109.75	1185.05	1176.63	1235.2	1014.13	1062.97	1053.97	1043.88	Phactr2	215789	phosphatase and actin regulator 2 [Source:MGI Symbol;Acc:MGI:2446138]
ENSMUSG00000041084	1205.67	-0.146012	0.0548644	-2.66132	0.00778346	0.0728581	1075.59	1097.64	1216.94	1190.75	1177.69	1262.44	1224.68	1297.54	1307.71	Ostc	66357	oligosaccharyltransferase complex subunit (non-catalytic) [Source:MGI Symbol;Acc:MGI:1913607]
ENSMUSG00000001986	289.509	0.495247	0.18625	2.65904	0.0078363	0.0732447	341.181	492.166	283.775	269.448	274.794	265.329	254.403	245.36	179.127	Gria3	53623	glutamate receptor, ionotropic, AMPA3 (alpha 3) [Source:MGI Symbol;Acc:MGI:95810]
ENSMUSG00000047034	92.727	-0.533928	0.200798	-2.65903	0.00783652	0.0732447	81.9221	63.1426	74.398	90.6004	77.5996	116.033	76.9124	107.457	146.478	Ankrd33	208258	ankyrin repeat domain 33 [Source:MGI Symbol;Acc:MGI:2443398]
ENSMUSG00000033147	418.428	0.197378	0.07425	2.65829	0.00785389	0.0733521	418.284	461.893	435.76	438.883	462.858	400.701	394.423	387.741	365.312	Slc22a15	242126	solute carrier family 22 (organic anion/cation transporter), member 15 [Source:MGI Symbol;Acc:MGI:3607704]
ENSMUSG00000022106	1345.28	-0.142256	0.0535372	-2.65715	0.00788055	0.0735345	1310.75	1248.15	1391.24	1256.64	1225.16	1468.98	1448.52	1367.39	1390.66	Rcbtb2	105670	regulator of chromosome condensation (RCC1) and BTB (POZ) domain containing protein 2 [Source:MGI Symbol;Acc:MGI:1917200]
ENSMUSG00000025092	1753.65	0.155453	0.0585081	2.65695	0.00788523	0.0735345	1783.97	2025.75	1833.38	1774.36	1766.53	1624.46	1554.03	1765.88	1654.49	Hspa12a	73442	heat shock protein 12A [Source:MGI Symbol;Acc:MGI:1920692]
ENSMUSG00000048279	1083.43	0.198717	0.0748132	2.65618	0.00790311	0.0736461	1152.69	1276.69	1076.65	1097.79	1138.43	877.984	1024.51	1074.57	1031.52	Sacs	50720	sacsin [Source:MGI Symbol;Acc:MGI:1354724]
ENSMUSG00000022617	1163.6	0.172099	0.064813	2.65531	0.00792347	0.0737806	1130.52	1169.44	1298.78	1310.76	1218.77	1150.28	1005.78	1070.09	1118	Chkb	12651	choline kinase beta [Source:MGI Symbol;Acc:MGI:1328313]
ENSMUSG00000025393	13956	-0.0651343	0.0245332	-2.65494	0.00793222	0.0738069	13524.9	13881.9	13950.7	13632.4	13387.3	14211.7	14218.9	14397.5	14398.9	Atp5b	11947	ATP synthase, H+ transporting mitochondrial F1 complex, beta subunit [Source:MGI Symbol;Acc:MGI:107801]
ENSMUSG00000025790	173.899	0.388338	0.146335	2.65376	0.00796009	0.074011	172.518	257.76	187.058	174.141	178.935	143.108	145.936	143.276	162.361	Slco3a1	108116	solute carrier organic anion transporter family, member 3a1 [Source:MGI Symbol;Acc:MGI:1351867]
ENSMUSG00000024524	849.108	0.215149	0.0810967	2.65299	0.00797814	0.0741235	839.46	1021.53	786.493	922.477	952.192	734.877	775.04	813.987	795.922	Gnal	14680	guanine nucleotide binding protein, alpha stimulating, olfactory type [Source:MGI Symbol;Acc:MGI:95774]
ENSMUSG00000028756	2352.81	-0.259754	0.0980063	-2.65038	0.00804012	0.0746416	1895.77	2139.93	2119.28	2294.43	2367.24	2432.83	2105.23	2796.57	3023.97	Pink1	68943	PTEN induced putative kinase 1 [Source:MGI Symbol;Acc:MGI:1916193]
ENSMUSG00000062184	355.106	0.303192	0.114406	2.65014	0.00804589	0.0746416	328.652	480.057	390.058	397.701	342.351	322.572	301.733	312.521	320.31	Hs6st2	50786	heparan sulfate 6-O-sulfotransferase 2 [Source:MGI Symbol;Acc:MGI:1354959]
ENSMUSG00000038843	222.099	-0.436695	0.164857	-2.64893	0.00807474	0.0748535	255.404	141.855	181.744	176.494	204.498	255.273	211.016	297.298	275.308	Gcnt1	14537	glucosaminyl (N-acetyl) transferase 1, core 2 [Source:MGI Symbol;Acc:MGI:95676]
ENSMUSG00000017188	570.25	-0.206216	0.0778566	-2.64866	0.00808111	0.0748569	553.215	557.039	462.33	541.249	555.065	646.692	565.01	632.206	619.443	Coa3	NA	cytochrome C oxidase assembly factor 3 [Source:MGI Symbol;Acc:MGI:1098757]
ENSMUSG00000020696	194.405	-0.294249	0.111136	-2.64764	0.00810556	0.0749719	169.627	178.183	160.487	172.964	200.846	217.369	237.64	212.228	200.304	Rffl	67338	ring finger and FYVE like domain containing protein [Source:MGI Symbol;Acc:MGI:1914588]
ENSMUSG00000051111	368.162	0.286311	0.108136	2.64768	0.0081046	0.0749719	325.761	415.184	399.623	437.706	422.689	338.817	366.813	286.552	320.31	Sv2c	NA	synaptic vesicle glycoprotein 2c [Source:MGI Symbol;Acc:MGI:1922459]
ENSMUSG00000025278	890.44	0.207579	0.0784302	2.64667	0.00812889	0.0750762	1011.98	973.953	943.792	902.474	900.155	816.874	934.782	716.38	813.57	Flnb	286940	filamin, beta [Source:MGI Symbol;Acc:MGI:2446089]
ENSMUSG00000034551	232.739	0.273814	0.103448	2.64687	0.00812399	0.0750762	251.549	258.625	260.393	249.445	241.928	239.028	187.351	210.437	195.892	Hdx	NA	highly divergent homeobox [Source:MGI Symbol;Acc:MGI:2685226]
ENSMUSG00000097908	360.496	0.233557	0.0882605	2.64622	0.00813964	0.0751198	393.226	346.852	379.43	405.937	406.256	313.29	301.733	346.549	351.194	4933404O12Rik	66752	RIKEN cDNA 4933404O12 gene [Source:MGI Symbol;Acc:MGI:1914002]
ENSMUSG00000053522	73.8353	-0.594047	0.224567	-2.6453	0.00816181	0.0752687	37.5878	65.7375	73.3352	48.2418	75.7737	84.3174	76.9124	97.6068	105.005	Lgals7	16858	lectin, galactose binding, soluble 7 [Source:MGI Symbol;Acc:MGI:1316742]
ENSMUSG00000022211	1016.52	0.289216	0.109386	2.644	0.00819338	0.075504	980.174	1100.24	936.352	1244.87	1268.07	877.984	758.277	964.427	1018.29	Carmil3	268747	capping protein regulator and myosin 1 linker 3 [Source:MGI Symbol;Acc:MGI:2448573]
ENSMUSG00000035936	917.503	0.161768	0.0611927	2.64358	0.0082035	0.0755413	886.686	958.384	1004.37	987.192	977.754	816.1	863.786	921.444	841.806	Aldh5a1	214579	aldhehyde dehydrogenase family 5, subfamily A1 [Source:MGI Symbol;Acc:MGI:2441982]
ENSMUSG00000016493	133.56	0.386873	0.146369	2.64313	0.00821431	0.075585	111.8	161.749	148.796	155.315	167.98	116.033	117.341	105.666	117.359	Cd46	17221	CD46 antigen, complement regulatory protein [Source:MGI Symbol;Acc:MGI:1203290]
ENSMUSG00000024644	1081.7	0.129624	0.0490588	2.64222	0.00823651	0.0757334	1084.26	1154.73	1157.42	1128.39	1098.26	1031.92	1057.05	1022.63	1000.64	Cndp2	66054	CNDP dipeptidase 2 (metallopeptidase M20 family) [Source:MGI Symbol;Acc:MGI:1913304]
ENSMUSG00000038530	1673.39	-0.197474	0.0747616	-2.64138	0.00825687	0.0758645	1486.16	1454.87	1483.71	1614.33	1815.83	1865.81	1842.94	1864.38	1632.43	Rgs4	19736	regulator of G-protein signaling 4 [Source:MGI Symbol;Acc:MGI:108409]
ENSMUSG00000037331	2288.14	0.158951	0.0601915	2.64076	0.00827209	0.0759484	2297.67	2494.57	2350.98	2476.8	2376.37	2239.44	2364.56	1996.01	1996.86	Larp1	73158	La ribonucleoprotein domain family, member 1 [Source:MGI Symbol;Acc:MGI:1890165]
ENSMUSG00000001802	1466.82	0.142266	0.0539111	2.63889	0.00831777	0.0760461	1505.44	1641.71	1484.77	1536.68	1486.26	1467.43	1301.59	1371.87	1405.66	Lrp3	435965	low density lipoprotein receptor-related protein 3 [Source:MGI Symbol;Acc:MGI:3584516]
ENSMUSG00000015994	942.546	-0.140756	0.053331	-2.63929	0.00830795	0.0760461	897.288	906.486	932.101	902.474	868.202	938.322	1015.64	1023.53	998.873	Fnta	14272	farnesyltransferase, CAAX box, alpha [Source:MGI Symbol;Acc:MGI:104683]
ENSMUSG00000021143	2791.38	0.132622	0.0502408	2.63973	0.00829724	0.0760461	2744.87	3076.69	2819.68	2836.85	3041.9	2637.82	2798.43	2642.55	2523.65	Pacs2	217893	phosphofurin acidic cluster sorting protein 2 [Source:MGI Symbol;Acc:MGI:1924399]
ENSMUSG00000022637	615.644	0.170615	0.0646617	2.63858	0.00832545	0.0760461	677.544	690.244	630.257	623.613	615.319	570.883	591.634	568.627	572.675	Cblb	208650	Casitas B-lineage lymphoma b [Source:MGI Symbol;Acc:MGI:2146430]
ENSMUSG00000024253	314.079	-0.266996	0.101181	-2.63879	0.00832021	0.0760461	290.101	242.191	297.592	302.394	309.485	344.232	311.594	380.577	348.547	Dync2li1	213575	dynein cytoplasmic 2 light intermediate chain 1 [Source:MGI Symbol;Acc:MGI:1913996]
ENSMUSG00000029918	297.682	-0.291354	0.11036	-2.64003	0.00828999	0.0760461	255.404	249.111	276.335	260.035	313.137	324.119	280.04	365.354	355.606	Mrps33	14548	mitochondrial ribosomal protein S33 [Source:MGI Symbol;Acc:MGI:1338046]
ENSMUSG00000032420	341.306	0.313982	0.118986	2.63881	0.00831978	0.0760461	420.212	346.852	438.948	304.747	358.784	330.308	268.207	311.625	292.073	Nt5e	NA	5' nucleotidase, ecto [Source:MGI Symbol;Acc:MGI:99782]
ENSMUSG00000054519	299.001	-0.302238	0.114559	-2.63827	0.00833298	0.0760591	285.282	253.435	285.901	247.092	283.01	310.969	277.082	359.981	388.255	Zfp867	237775	zinc finger protein 867 [Source:MGI Symbol;Acc:MGI:2681848]
ENSMUSG00000020561	325.353	-0.25721	0.0975541	-2.63659	0.00837441	0.0763812	263.114	294.089	335.854	303.57	300.356	327.987	366.813	394.905	341.488	Twistnb	NA	twist basic helix-loop-helix transcription factor 1 neighbor [Source:MGI Symbol;Acc:MGI:106292]
ENSMUSG00000018401	1822.33	0.14408	0.0546631	2.63578	0.0083945	0.0763968	2051.91	1943.58	1745.16	1887.31	1882.47	1646.9	1791.66	1696.03	1755.97	Mtmr4	170749	myotubularin related protein 4 [Source:MGI Symbol;Acc:MGI:2180699]
ENSMUSG00000028792	1167.08	-0.146508	0.0555742	-2.63625	0.0083827	0.0763968	1091.01	1031.91	1151.04	1190.75	1108.3	1187.41	1275.96	1221.43	1245.94	Ak2	11637	adenylate kinase 2 [Source:MGI Symbol;Acc:MGI:87978]
ENSMUSG00000039065	256.906	-0.265122	0.100586	-2.63578	0.00839451	0.0763968	252.513	204.132	227.445	236.502	258.361	284.668	291.873	292.82	263.837	Atpsckmt	68073	ATP synthase C subunit lysine N-methyltransferase [Source:MGI Symbol;Acc:MGI:1915323]
ENSMUSG00000036564	2127.22	0.175986	0.0667814	2.63526	0.00840727	0.076457	2300.56	2556.84	2065.08	2149.7	2134.44	2008.92	1859.7	2064.07	2005.69	Ndrg4	234593	N-myc downstream regulated gene 4 [Source:MGI Symbol;Acc:MGI:2384590]
ENSMUSG00000034022	2303.29	0.120663	0.0458225	2.63326	0.00845687	0.0766843	2331.41	2317.25	2419	2453.27	2425.67	2309.83	2118.05	2088.25	2266.88	Cpsf1	94230	cleavage and polyadenylation specific factor 1 [Source:MGI Symbol;Acc:MGI:2679722]
ENSMUSG00000035203	2599.24	0.122096	0.0463632	2.63347	0.00845183	0.0766843	2657.17	2818.93	2559.29	2752.13	2695.9	2623.12	2466.13	2356	2464.53	Epn1	13854	epsin 1 [Source:MGI Symbol;Acc:MGI:1333763]
ENSMUSG00000040701	79.6068	0.486509	0.184727	2.63366	0.008447	0.0766843	80.9583	106.391	87.1519	110.603	71.209	65.7521	70.01	58.2059	66.1798	Ap1g2	11766	adaptor protein complex AP-1, gamma 2 subunit [Source:MGI Symbol;Acc:MGI:1328307]
ENSMUSG00000041278	566.238	-0.181263	0.0688194	-2.63389	0.00844121	0.0766843	576.346	529.36	523.974	516.54	526.764	645.145	568.955	616.087	592.971	Ttc1	NA	tetratricopeptide repeat domain 1 [Source:MGI Symbol;Acc:MGI:1914077]
ENSMUSG00000018581	155.46	0.383058	0.14562	2.63054	0.008525	0.0771653	190.83	174.723	191.309	144.725	164.328	122.995	165.657	130.739	113.829	Dnah11	13411	dynein, axonemal, heavy chain 11 [Source:MGI Symbol;Acc:MGI:1100864]
ENSMUSG00000021290	1012.55	-0.197976	0.0752725	-2.63013	0.00853519	0.0771653	892.469	1010.28	1025.63	937.773	886.461	1039.66	983.098	1155.16	1182.41	Atp5mpl	70257	ATP synthase membrane subunit 6.8PL [Source:MGI Symbol;Acc:MGI:1917507]
ENSMUSG00000022191	2117.1	0.105717	0.0401982	2.6299	0.00854089	0.0771653	2194.55	2231.62	2160.73	2173.23	2167.31	2076.99	2103.26	2004.07	1942.16	Drosha	14000	drosha, ribonuclease type III [Source:MGI Symbol;Acc:MGI:1261425]
ENSMUSG00000028064	354.765	0.238624	0.0907187	2.63038	0.00852901	0.0771653	389.371	397.02	356.048	383.581	377.043	340.364	313.566	280.284	355.606	Sema4a	20351	sema domain, immunoglobulin domain (Ig), transmembrane domain (TM) and short cytoplasmic domain, (semaphorin) 4A [Source:MGI Symbol;Acc:MGI:107560]
ENSMUSG00000029128	1062	-0.156834	0.059618	-2.63064	0.00852237	0.0771653	1107.39	978.278	1042.63	933.067	990.535	1144.86	1086.63	1132.78	1141.82	Rab28	100972	RAB28, member RAS oncogene family [Source:MGI Symbol;Acc:MGI:1917285]
ENSMUSG00000038914	1966.19	0.141011	0.0536287	2.62939	0.00855385	0.0772264	2167.56	2007.59	2027.88	1954.38	2094.27	1803.93	2032.26	1790.05	1817.74	Dido1	23856	death inducer-obliterator 1 [Source:MGI Symbol;Acc:MGI:1344352]
ENSMUSG00000015289	391.333	-0.21031	0.080001	-2.62884	0.00856768	0.0772862	358.53	365.016	356.048	368.285	381.607	419.267	385.548	423.56	464.141	Lage3	66192	L antigen family, member 3 [Source:MGI Symbol;Acc:MGI:1913442]
ENSMUSG00000034377	2529.23	0.148449	0.056474	2.62863	0.00857288	0.0772862	2570.43	2812.87	2666.64	2526.22	2640.21	2145.07	2454.29	2522.55	2424.83	Tulp4	68842	tubby like protein 4 [Source:MGI Symbol;Acc:MGI:1916092]
ENSMUSG00000069910	386.132	-0.25435	0.0968035	-2.62749	0.00860179	0.0774908	419.248	332.147	358.173	321.22	347.829	464.133	399.353	429.828	403.255	Spdl1	70385	spindle apparatus coiled-coil protein 1 [Source:MGI Symbol;Acc:MGI:1917635]
ENSMUSG00000039463	645.334	0.180294	0.0686256	2.62721	0.00860869	0.0774969	630.318	674.674	668.519	703.624	726.697	560.827	594.592	615.191	633.561	Slc9a8	77031	solute carrier family 9 (sodium/hydrogen exchanger), member 8 [Source:MGI Symbol;Acc:MGI:1924281]
ENSMUSG00000049091	424.227	-0.212781	0.0810198	-2.62629	0.00863215	0.0776519	445.271	371.071	392.184	362.402	409.908	473.415	444.711	457.588	461.493	Sephs2	20768	selenophosphate synthetase 2 [Source:MGI Symbol;Acc:MGI:108388]
ENSMUSG00000034171	444.933	0.204544	0.077936	2.62452	0.00867722	0.0779446	431.778	507.736	477.21	489.478	458.294	418.493	380.618	413.71	427.08	Faah	14073	fatty acid amide hydrolase [Source:MGI Symbol;Acc:MGI:109609]
ENSMUSG00000062797	513.285	-0.187015	0.0712514	-2.62473	0.00867189	0.0779446	516.591	464.487	487.838	494.184	456.468	562.374	514.722	577.582	545.321	Hikeshi	67669	heat shock protein nuclear import factor [Source:MGI Symbol;Acc:MGI:96738]
ENSMUSG00000085385	717.951	0.206312	0.0786169	2.62427	0.00868345	0.0779446	662.123	730.032	762.048	845.996	817.078	679.954	677.421	629.519	657.386	Snhg17	NA	small nucleolar RNA host gene 17 [Source:MGI Symbol;Acc:MGI:1915358]
ENSMUSG00000062861	346.506	0.23333	0.0889301	2.62375	0.00869683	0.0780085	350.819	355.502	403.875	380.051	366.087	291.63	298.775	323.267	348.547	Zfp28	22690	zinc finger protein 28 [Source:MGI Symbol;Acc:MGI:99175]
ENSMUSG00000004110	288.294	0.54714	0.208597	2.62295	0.0087173	0.0781358	299.738	561.364	244.451	303.57	266.577	212.728	239.612	229.242	237.365	Cacna1e	12290	calcium channel, voltage-dependent, R type, alpha 1E subunit [Source:MGI Symbol;Acc:MGI:106217]
ENSMUSG00000074800	128.251	-0.440035	0.167788	-2.62256	0.00872707	0.0781672	121.437	115.906	117.974	114.133	84.903	157.032	112.41	151.335	179.127	Gm4149	NA	predicted pseudogene 4149 [Source:MGI Symbol;Acc:MGI:3782325]
ENSMUSG00000026771	534.92	0.21609	0.082407	2.62222	0.00873583	0.0781895	515.627	552.714	581.367	625.967	577.888	520.602	439.781	522.958	477.377	Spopl	76857	speckle-type BTB/POZ protein-like [Source:MGI Symbol;Acc:MGI:1924107]
ENSMUSG00000070343	56.7914	-0.5716	0.218071	-2.62116	0.00876309	0.0783771	40.4791	48.4382	45.7016	62.3613	37.4304	69.6199	53.2471	81.4882	72.3565	Gm10288	NA	predicted gene 10288 [Source:MGI Symbol;Acc:MGI:3704227]
ENSMUSG00000020571	2393.97	-0.188386	0.0718873	-2.62057	0.00877819	0.0784558	1989.26	2360.5	2406.24	2369.73	2145.4	2524.11	2859.56	2524.34	2366.59	Pdia6	71853	protein disulfide isomerase associated 6 [Source:MGI Symbol;Acc:MGI:1919103]
ENSMUSG00000002265	3223.95	0.195771	0.0747447	2.61919	0.00881377	0.078661	3173.76	3305.04	3208.68	3705.2	3689.17	2801.81	3414.71	2971.19	2746.02	Peg3	18616	paternally expressed 3 [Source:MGI Symbol;Acc:MGI:104748]
ENSMUSG00000034621	2116.94	0.129109	0.0492933	2.61921	0.00881347	0.078661	2218.64	2192.69	2347.79	2140.29	2104.32	2068.48	2104.24	1910.05	1965.98	Gpatch8	237943	G patch domain containing 8 [Source:MGI Symbol;Acc:MGI:1918667]
ENSMUSG00000029247	4821.57	-0.1397	0.0533594	-2.6181	0.00884209	0.0788573	4359.22	4528.1	5080.32	4741.81	4359.27	4946.88	4895.77	5309.27	5173.49	Paics	67054	phosphoribosylaminoimidazole carboxylase, phosphoribosylaminoribosylaminoimidazole, succinocarboxamide synthetase [Source:MGI Symbol;Acc:MGI:1914304]
ENSMUSG00000035890	1020.94	0.181189	0.0692168	2.61771	0.00885233	0.0788921	1097.76	1046.61	1022.44	1134.27	1088.22	1017.22	930.837	837.269	1013.87	Rnf126	70294	ring finger protein 126 [Source:MGI Symbol;Acc:MGI:1917544]
ENSMUSG00000021608	2221.94	0.113904	0.0435266	2.61688	0.00887374	0.0790264	2336.22	2360.5	2255.32	2194.41	2349.9	2152.03	2009.58	2163.47	2175.99	Lpcat1	210992	lysophosphatidylcholine acyltransferase 1 [Source:MGI Symbol;Acc:MGI:2384812]
ENSMUSG00000025809	3385.67	-0.13199	0.0504448	-2.61652	0.00888312	0.0790535	3148.7	3151.08	3331.97	3374.57	3229.97	3269.04	3766.74	3709.06	3489.88	Itgb1	16412	integrin beta 1 (fibronectin receptor beta) [Source:MGI Symbol;Acc:MGI:96610]
ENSMUSG00000031879	336.192	-0.241928	0.0924886	-2.61576	0.00890298	0.0791736	326.725	306.198	341.168	309.453	272.968	392.966	343.148	351.026	382.078	Ciao2b	NA	cytosolic iron-sulfur assembly component 2B [Source:MGI Symbol;Acc:MGI:1915773]
ENSMUSG00000024054	2501.18	0.158084	0.0604417	2.61549	0.00891004	0.0791799	2798.84	2676.21	2811.18	2479.16	2344.42	2325.31	2437.53	2364.05	2273.94	Smchd1	74355	SMC hinge domain containing 1 [Source:MGI Symbol;Acc:MGI:1921605]
ENSMUSG00000027347	53.5345	0.54491	0.208572	2.61258	0.00898616	0.0797994	54.936	68.3324	51.0158	72.951	63.9055	37.1306	38.4562	45.6692	49.4142	Rasgrp1	19419	RAS guanyl releasing protein 1 [Source:MGI Symbol;Acc:MGI:1314635]
ENSMUSG00000075700	2218.42	-0.113537	0.043465	-2.61213	0.00899788	0.0798465	2290.93	2115.71	2102.27	2062.63	2128.05	2277.34	2381.33	2330.92	2276.58	Selenot	NA	selenoprotein T [Source:MGI Symbol;Acc:MGI:1916477]
ENSMUSG00000054999	78.4735	0.52978	0.202894	2.61112	0.00902473	0.0800278	65.5377	86.4967	113.723	104.72	84.903	66.5257	49.3028	63.5787	71.4741	Naaladl1	381204	N-acetylated alpha-linked acidic dipeptidase-like 1 [Source:MGI Symbol;Acc:MGI:2685810]
ENSMUSG00000024425	2917.77	-0.136677	0.0523506	-2.61081	0.00903294	0.0800436	2622.47	2838.82	2732.53	2835.68	2942.39	2999.84	2860.55	3278.33	3149.27	Ndfip1	65113	Nedd4 family interacting protein 1 [Source:MGI Symbol;Acc:MGI:1929601]
ENSMUSG00000030291	354.195	-0.209394	0.0802183	-2.61031	0.00904613	0.0801036	327.688	322.633	316.723	328.279	359.697	366.665	388.506	374.309	403.255	Med21	108098	mediator complex subunit 21 [Source:MGI Symbol;Acc:MGI:1347064]
ENSMUSG00000031068	1596.29	-0.178648	0.0684881	-2.60846	0.00909517	0.0804806	1461.1	1530.99	1571.92	1466.08	1509.08	1554.07	1559.94	1829.46	1883.92	Glrx3	30926	glutaredoxin 3 [Source:MGI Symbol;Acc:MGI:1353653]
ENSMUSG00000036309	4591.37	-0.119748	0.0459246	-2.60748	0.00912106	0.0806524	4215.61	4464.1	4447.94	4673.57	4309.06	4775.15	4522.06	5092.57	4822.3	Skp1a	21402	S-phase kinase-associated protein 1A [Source:MGI Symbol;Acc:MGI:103575]
ENSMUSG00000030223	1067.47	0.181383	0.0695733	2.60708	0.00913176	0.0806898	1242.32	1178.09	1131.91	1058.97	1019.75	966.943	1066.91	979.65	962.695	Ptpro	19277	protein tyrosine phosphatase, receptor type, O [Source:MGI Symbol;Acc:MGI:1097152]
ENSMUSG00000021076	1545.42	-0.117055	0.0449036	-2.6068	0.0091393	0.0806991	1488.09	1508.5	1560.23	1444.9	1447	1660.05	1562.9	1602.9	1634.2	Actr10	56444	ARP10 actin-related protein 10 [Source:MGI Symbol;Acc:MGI:1891654]
ENSMUSG00000027115	965.253	-0.209844	0.0805259	-2.60591	0.00916293	0.0808505	1064.99	840.748	936.352	793.048	876.418	1057.45	1037.33	1044.12	1036.82	Kif18a	228421	kinesin family member 18A [Source:MGI Symbol;Acc:MGI:2446977]
ENSMUSG00000104960	289.801	-0.280816	0.107777	-2.60552	0.00917347	0.0808862	239.02	277.655	285.901	295.334	225.495	304.007	343.148	340.281	297.368	Snhg8	69895	small nucleolar RNA host gene 8 [Source:MGI Symbol;Acc:MGI:1917145]
ENSMUSG00000002052	2662.87	0.104385	0.0400679	2.60521	0.00918166	0.0809012	2734.27	2822.39	2773.98	2623.88	2780.8	2504	2679.12	2543.15	2504.24	Supt6	20926	SPT6, histone chaperone and transcription elongation factor [Source:MGI Symbol;Acc:MGI:107726]
ENSMUSG00000063430	144.198	-0.327169	0.125608	-2.60468	0.00919604	0.0809706	128.184	120.23	130.728	141.195	128.724	169.408	137.062	172.827	169.42	Wscd2	320916	WSC domain containing 2 [Source:MGI Symbol;Acc:MGI:2445030]
ENSMUSG00000027422	754.127	0.217642	0.0835872	2.60378	0.00922023	0.0810857	759.466	800.96	751.42	893.061	815.252	663.71	803.636	655.488	644.15	Rrbp1	81910	ribosome binding protein 1 [Source:MGI Symbol;Acc:MGI:1932395]
ENSMUSG00000031633	5597.92	-0.111122	0.0426783	-2.60371	0.00922213	0.0810857	5081.1	5557.41	5382.16	5588.99	5419.19	5670.15	5594.88	6063.26	6024.12	Slc25a4	11739	solute carrier family 25 (mitochondrial carrier, adenine nucleotide translocator), member 4 [Source:MGI Symbol;Acc:MGI:1353495]
ENSMUSG00000040721	1602.18	0.218601	0.0840032	2.6023	0.00926016	0.0813627	1943	1582.89	1672.89	1686.11	1660.63	1624.46	1579.66	1256.35	1413.6	Zfhx2	239102	zinc finger homeobox 2 [Source:MGI Symbol;Acc:MGI:2686934]
ENSMUSG00000032872	903.139	-0.283322	0.108896	-2.60178	0.00927417	0.081371	818.257	787.985	938.478	789.518	785.125	922.851	796.734	1173.07	1116.23	Cyb5r4	266690	cytochrome b5 reductase 4 [Source:MGI Symbol;Acc:MGI:2386848]
ENSMUSG00000038115	266.901	-0.398964	0.15334	-2.60183	0.0092728	0.081371	275.644	204.132	260.393	187.084	241.928	315.61	226.793	335.803	354.723	Ano2	243634	anoctamin 2 [Source:MGI Symbol;Acc:MGI:2387214]
ENSMUSG00000018537	1083.76	0.238894	0.0918578	2.6007	0.00930343	0.0815703	1041.86	1231.71	1152.11	1300.17	1089.13	1136.35	1021.55	863.238	917.693	Pcgf2	22658	polycomb group ring finger 2 [Source:MGI Symbol;Acc:MGI:99161]
ENSMUSG00000028076	721.489	0.181385	0.0697707	2.59973	0.00932969	0.0816282	729.588	731.762	834.32	783.635	731.262	709.35	628.118	644.742	700.623	Cd1d1	12479	CD1d1 antigen [Source:MGI Symbol;Acc:MGI:107674]
ENSMUSG00000033287	650.01	0.185496	0.0713465	2.59993	0.00932418	0.0816282	746.937	725.708	617.503	674.208	669.182	616.523	576.843	616.982	606.207	Kctd17	72844	potassium channel tetramerisation domain containing 17 [Source:MGI Symbol;Acc:MGI:1920094]
ENSMUSG00000058638	555.978	-0.204334	0.0785981	-2.59973	0.00932969	0.0816282	574.418	517.25	549.482	489.478	473.814	607.24	553.178	608.028	630.914	Zfp110	65020	zinc finger protein 110 [Source:MGI Symbol;Acc:MGI:1890378]
ENSMUSG00000027977	370.702	0.262452	0.100982	2.599	0.00934957	0.0817317	424.067	391.83	399.623	403.584	383.433	349.647	291.873	394.009	298.25	Ndst3	83398	N-deacetylase/N-sulfotransferase (heparan glucosaminyl) 3 [Source:MGI Symbol;Acc:MGI:1932544]
ENSMUSG00000056185	323.269	0.267179	0.102808	2.59881	0.00935464	0.0817317	399.972	382.316	323.1	317.69	324.092	317.157	284.97	288.343	271.778	Snx32	225861	sorting nexin 32 [Source:MGI Symbol;Acc:MGI:2444704]
ENSMUSG00000018906	174.206	0.494867	0.190481	2.59798	0.00937734	0.0818726	195.649	216.242	250.828	197.674	139.679	153.164	184.393	115.516	114.712	P4ha2	18452	procollagen-proline, 2-oxoglutarate 4-dioxygenase (proline 4-hydroxylase), alpha II polypeptide [Source:MGI Symbol;Acc:MGI:894286]
ENSMUSG00000020895	368.05	-0.285465	0.109905	-2.59737	0.00939394	0.0819176	346.964	279.384	320.974	377.698	354.219	420.814	344.134	421.769	446.493	Tmem107	66910	transmembrane protein 107 [Source:MGI Symbol;Acc:MGI:1914160]
ENSMUSG00000087259	219.408	-0.373524	0.143812	-2.59731	0.00939564	0.0819176	227.454	206.727	225.32	143.549	166.154	259.914	224.821	249.838	270.896	2610035D17Rik	72386	RIKEN cDNA 2610035D17 gene [Source:MGI Symbol;Acc:MGI:1919636]
ENSMUSG00000021868	422.717	0.200088	0.0770482	2.59692	0.0094065	0.0819549	423.103	469.677	430.446	431.823	485.682	372.853	394.423	398.486	397.961	Ppif	105675	peptidylprolyl isomerase F (cyclophilin F) [Source:MGI Symbol;Acc:MGI:2145814]
ENSMUSG00000034203	297.187	-0.258943	0.0998099	-2.59436	0.00947666	0.0825085	307.449	304.468	252.953	251.799	248.319	317.157	328.357	344.758	319.428	Chchd4	NA	coiled-coil-helix-coiled-coil-helix domain containing 4 [Source:MGI Symbol;Acc:MGI:1919420]
ENSMUSG00000036246	406.668	0.262613	0.101243	2.59389	0.00948961	0.0825636	425.995	531.955	406	427.116	404.431	390.645	336.245	358.19	379.431	Gmip	78816	Gem-interacting protein [Source:MGI Symbol;Acc:MGI:1926066]
ENSMUSG00000013858	2037.52	0.10322	0.0398018	2.59335	0.00950452	0.0825884	2174.31	2063.81	2094.83	2112.05	2067.8	1998.09	1901.12	1922.59	2003.04	Tmem259	216157	transmembrane protein 259 [Source:MGI Symbol;Acc:MGI:2177957]
ENSMUSG00000081051	362.314	-0.329566	0.127083	-2.59331	0.00950572	0.0825884	326.725	280.249	327.351	330.633	362.436	433.964	304.691	424.455	470.317	Gm15427	NA	predicted pseudogene 15427 [Source:MGI Symbol;Acc:MGI:3642341]
ENSMUSG00000025135	1160.34	-0.19037	0.073415	-2.59307	0.00951244	0.0825892	1005.23	999.037	1073.46	1174.28	1209.64	1256.25	1148.76	1257.25	1319.18	Anapc11	66156	anaphase promoting complex subunit 11 [Source:MGI Symbol;Acc:MGI:1913406]
ENSMUSG00000021743	473.817	-0.250956	0.0967996	-2.59253	0.00952723	0.08266	360.457	502.546	457.016	451.825	412.647	534.526	546.275	496.093	502.966	Fezf2	54713	Fez family zinc finger 2 [Source:MGI Symbol;Acc:MGI:1859823]
ENSMUSG00000026035	298.607	-0.229879	0.0886976	-2.59172	0.00954977	0.0827979	291.064	263.815	281.65	264.741	284.836	327.987	346.106	293.716	333.546	Ppil3	70225	peptidylprolyl isomerase (cyclophilin)-like 3 [Source:MGI Symbol;Acc:MGI:1917475]
ENSMUSG00000024132	345.93	-0.233691	0.0901782	-2.59143	0.00955771	0.0828091	329.616	296.684	290.152	340.046	348.742	385.23	347.092	375.204	400.608	Eci1	13177	enoyl-Coenzyme A delta isomerase 1 [Source:MGI Symbol;Acc:MGI:94871]
ENSMUSG00000031808	1041.67	0.147978	0.0571622	2.58874	0.00963265	0.0834004	1105.47	1057.86	1042.63	1157.8	1083.65	1033.47	943.656	934.876	1015.64	Slc27a1	26457	solute carrier family 27 (fatty acid transporter), member 1 [Source:MGI Symbol;Acc:MGI:1347098]
ENSMUSG00000021774	1596.53	-0.140519	0.0542887	-2.58836	0.00964342	0.0834288	1468.81	1564.73	1641.01	1442.55	1517.3	1630.65	1630.94	1792.74	1680.08	Ube2e1	22194	ubiquitin-conjugating enzyme E2E 1 [Source:MGI Symbol;Acc:MGI:107411]
ENSMUSG00000105161	87.9224	0.434528	0.167892	2.58815	0.00964932	0.0834288	81.9221	95.1464	108.409	109.426	103.162	88.1852	69.024	69.8471	66.1798	Gm42595	NA	predicted gene 42595 [Source:MGI Symbol;Acc:MGI:5662732]
ENSMUSG00000020949	2130.64	-0.150302	0.058084	-2.58767	0.00966272	0.0834289	1915.05	2040.46	2200.05	2060.28	1943.64	2169.05	2108.19	2338.09	2401	Fkbp3	30795	FK506 binding protein 3 [Source:MGI Symbol;Acc:MGI:1353460]
ENSMUSG00000040767	337.871	-0.272981	0.105487	-2.58782	0.00965859	0.0834289	307.449	295.819	324.163	300.04	319.528	368.212	303.705	390.427	431.492	Snrnp25	78372	small nuclear ribonucleoprotein 25 (U11/U12) [Source:MGI Symbol;Acc:MGI:1925622]
ENSMUSG00000004748	258.229	-0.362698	0.140213	-2.58676	0.00968826	0.083513	300.702	217.107	200.875	196.497	230.06	306.328	246.514	326.848	299.132	Mtfp1	67900	mitochondrial fission process 1 [Source:MGI Symbol;Acc:MGI:1916686]
ENSMUSG00000034192	785.673	-0.195924	0.0757432	-2.58668	0.00969045	0.083513	673.689	705.813	798.184	767.162	746.782	806.817	768.138	904.43	900.045	Lsm3	NA	LSM3 homolog, U6 small nuclear RNA and mRNA degradation associated [Source:MGI Symbol;Acc:MGI:1914928]
ENSMUSG00000040725	5068.81	0.0997966	0.0385856	2.58637	0.00969928	0.083513	5110.01	5246.89	5408.73	5146.57	5204.65	4711.72	5129.47	4702.14	4959.07	Hnrnpul1	232989	heterogeneous nuclear ribonucleoprotein U-like 1 [Source:MGI Symbol;Acc:MGI:2443517]
ENSMUSG00000066900	1941.25	-0.127404	0.0492563	-2.58655	0.00969427	0.083513	1931.43	1758.48	1836.57	1874.37	1924.47	2018.98	1912.95	2090.04	2123.93	Suds3	71954	suppressor of defective silencing 3 homolog (S. cerevisiae) [Source:MGI Symbol;Acc:MGI:1919204]
ENSMUSG00000053646	3886.26	0.123708	0.0478463	2.58553	0.00972293	0.0836589	4429.57	3856.02	3913.33	3969.95	3997.75	3667.42	3833.79	3599.81	3708.71	Plxnb1	235611	plexin B1 [Source:MGI Symbol;Acc:MGI:2154238]
ENSMUSG00000086040	99.2747	0.42577	0.164877	2.58234	0.00981318	0.0843771	115.655	116.771	92.4661	128.253	107.726	102.883	75.9264	77.9063	75.8861	Wipf3	330319	WAS/WASL interacting protein family, member 3 [Source:MGI Symbol;Acc:MGI:3044681]
ENSMUSG00000062949	1414.4	0.131236	0.0508656	2.58005	0.00987863	0.0848813	1502.55	1498.99	1458.2	1486.08	1412.31	1424.89	1326.25	1362.02	1258.3	Atp11c	320940	ATPase, class VI, type 11C [Source:MGI Symbol;Acc:MGI:1859661]
ENSMUSG00000025203	18136.1	0.163098	0.0632323	2.57934	0.00989887	0.0849966	21823.1	18711.8	18780.2	17727.1	18160.1	17678.8	18009.3	16322.7	16012	Scd2	20250	stearoyl-Coenzyme A desaturase 2 [Source:MGI Symbol;Acc:MGI:98240]
ENSMUSG00000030168	1536.7	-0.192563	0.074679	-2.57854	0.00992177	0.0850833	1707.83	1303.51	1412.5	1404.89	1395.88	1619.82	1738.42	1648.57	1598.9	Adipor2	68465	adiponectin receptor 2 [Source:MGI Symbol;Acc:MGI:93830]
ENSMUSG00000106547	105.332	0.577478	0.223958	2.57851	0.00992263	0.0850833	68.429	128.015	140.293	167.081	114.117	90.5059	75.9264	85.9656	77.6509	B230303O12Rik	NA	RIKEN cDNA B230303O12 gene [Source:MGI Symbol;Acc:MGI:2442644]
ENSMUSG00000037997	547.879	0.198338	0.0769572	2.57726	0.00995879	0.0853346	607.187	628.831	542.043	594.198	533.155	539.168	515.708	482.661	487.965	Parp11	101187	poly (ADP-ribose) polymerase family, member 11 [Source:MGI Symbol;Acc:MGI:2141505]
ENSMUSG00000002058	2060.33	-0.248046	0.0962612	-2.5768	0.00997197	0.0853888	2078.89	1785.29	1788.74	1867.31	1989.29	2229.38	1798.57	2330.03	2675.43	Unc119	22248	unc-119 lipid binding chaperone [Source:MGI Symbol;Acc:MGI:1328357]
ENSMUSG00000020256	280.469	0.315336	0.122397	2.57634	0.00998512	0.0854427	347.928	350.312	314.597	251.799	270.229	236.708	265.249	263.27	224.129	Aldh1l2	216188	aldehyde dehydrogenase 1 family, member L2 [Source:MGI Symbol;Acc:MGI:2444680]
ENSMUSG00000020135	3593.25	0.219187	0.0851742	2.5734	0.0100705	0.0860665	3684.57	4807.49	3646.56	3478.11	3547.67	3253.57	3309.21	3342.81	3269.28	Apc2	23805	adenomatosis polyposis coli 2 [Source:MGI Symbol;Acc:MGI:1346052]
ENSMUSG00000032363	207.624	0.37611	0.146156	2.57335	0.0100718	0.0860665	216.853	273.33	201.937	205.91	256.535	181.785	216.932	142.381	172.95	Adamts7	108153	a disintegrin-like and metallopeptidase (reprolysin type) with thrombospondin type 1 motif, 7 [Source:MGI Symbol;Acc:MGI:1347346]
ENSMUSG00000020056	244.935	-0.24617	0.0957246	-2.57164	0.0101217	0.0864333	232.273	212.782	229.571	211.793	244.667	269.197	248.486	283.866	271.778	Washc3	67282	WASH complex subunit 3 [Source:MGI Symbol;Acc:MGI:1914532]
ENSMUSG00000020477	465.988	-0.203977	0.0793341	-2.57112	0.0101371	0.0864465	388.407	446.323	460.205	441.236	447.339	503.584	464.433	500.571	541.792	Mrps24	64660	mitochondrial ribosomal protein S24 [Source:MGI Symbol;Acc:MGI:1928142]
ENSMUSG00000022376	74.77	0.522016	0.203019	2.57127	0.0101326	0.0864465	115.655	76.9821	64.8325	88.2472	86.7289	68.8464	54.2331	63.5787	53.8262	Adcy8	NA	adenylate cyclase 8 [Source:MGI Symbol;Acc:MGI:1341110]
ENSMUSG00000044730	452.958	0.181331	0.0705467	2.57036	0.0101592	0.0865162	450.09	490.436	506.969	473.005	470.162	429.323	420.06	427.142	409.432	9930104L06Rik	194268	RIKEN cDNA 9930104L06 gene [Source:MGI Symbol;Acc:MGI:3041172]
ENSMUSG00000056602	1025.92	0.235721	0.0917002	2.57056	0.0101534	0.0865162	1086.19	1325.99	991.619	1001.31	1090.05	896.55	959.433	1023.53	858.572	Fry	320365	FRY microtubule binding protein [Source:MGI Symbol;Acc:MGI:2443895]
ENSMUSG00000024456	783.577	0.178458	0.0694755	2.56865	0.0102096	0.0867085	882.831	834.693	814.127	790.695	808.861	789.026	768.138	700.262	663.562	Diaph1	13367	diaphanous related formin 1 [Source:MGI Symbol;Acc:MGI:1194490]
ENSMUSG00000035067	351.517	0.224495	0.0873891	2.56891	0.0102018	0.0867085	325.761	379.721	373.053	405.937	394.388	327.987	311.594	314.312	330.899	Xkr6	219149	X-linked Kx blood group related 6 [Source:MGI Symbol;Acc:MGI:2447765]
ENSMUSG00000046721	1093.43	-0.174203	0.0678169	-2.56872	0.0102074	0.0867085	958.97	1021.53	985.242	1051.91	1154.86	1222.22	1135.94	1091.58	1218.59	Rpl14-ps1	NA	ribosomal protein L14, pseudogene 1 [Source:MGI Symbol;Acc:MGI:3710579]
ENSMUSG00000067608	425.661	-0.226509	0.0881602	-2.56929	0.0101906	0.0867085	382.624	363.286	425.131	427.116	383.433	473.415	408.227	464.752	502.966	Pcna-ps2	NA	proliferating cell nuclear antigen pseudogene 2 [Source:MGI Symbol;Acc:MGI:97505]
ENSMUSG00000026944	1416.26	0.179253	0.0697929	2.56835	0.0102183	0.0867233	1415.81	1530.13	1349.79	1570.8	1600.38	1250.84	1465.28	1263.52	1299.77	Abca2	11305	ATP-binding cassette, sub-family A (ABC1), member 2 [Source:MGI Symbol;Acc:MGI:99606]
ENSMUSG00000036672	734.269	0.168181	0.0654971	2.56777	0.0102355	0.0867889	731.516	743.872	755.671	793.048	837.162	711.67	671.505	650.115	713.859	Cenpt	320394	centromere protein T [Source:MGI Symbol;Acc:MGI:2443939]
ENSMUSG00000070934	1534.64	-0.145773	0.0567736	-2.56762	0.01024	0.0867889	1598.93	1477.36	1381.68	1454.31	1413.22	1640.71	1710.81	1603.8	1530.96	Rraga	68441	Ras-related GTP binding A [Source:MGI Symbol;Acc:MGI:1915691]
ENSMUSG00000022614	1089.39	0.183192	0.0713783	2.56649	0.0102734	0.0870128	1206.66	983.468	1172.3	1209.57	1182.25	1060.54	1027.47	954.577	1007.7	Lmf2	105847	lipase maturation factor 2 [Source:MGI Symbol;Acc:MGI:2146015]
ENSMUSG00000050947	428.506	-0.189799	0.0739728	-2.5658	0.0102939	0.0871276	431.778	407.4	385.807	385.934	403.518	433.964	479.223	467.438	461.493	Amigo1	229715	adhesion molecule with Ig like domain 1 [Source:MGI Symbol;Acc:MGI:2653612]
ENSMUSG00000027035	545.137	0.234593	0.0914606	2.56496	0.0103186	0.0872776	639.956	671.215	540.98	520.07	545.936	495.075	527.54	491.616	473.847	Cers6	241447	ceramide synthase 6 [Source:MGI Symbol;Acc:MGI:2442564]
ENSMUSG00000057716	903.153	0.221112	0.0862262	2.56433	0.0103375	0.0873776	902.107	1167.71	931.038	868.352	948.54	809.912	819.413	869.506	811.805	Tmem178b	434008	transmembrane protein 178B [Source:MGI Symbol;Acc:MGI:3647581]
ENSMUSG00000046709	587.243	0.249603	0.0973566	2.56381	0.0103531	0.0874508	639.956	774.146	596.247	554.192	592.495	533.753	558.108	507.734	528.556	Mapk10	26414	mitogen-activated protein kinase 10 [Source:MGI Symbol;Acc:MGI:1346863]
ENSMUSG00000030411	1119.55	0.230305	0.0898636	2.56282	0.0103825	0.0875798	1158.47	1474.77	1089.4	1142.51	1123.82	1074.47	1059.02	959.054	994.461	Nova2	384569	NOVA alternative splicing regulator 2 [Source:MGI Symbol;Acc:MGI:104296]
ENSMUSG00000075318	584.78	0.331827	0.129476	2.56284	0.0103819	0.0875798	623.572	885.727	565.425	550.662	590.67	504.358	505.847	539.972	496.789	Scn2a	110876	sodium channel, voltage-gated, type II, alpha [Source:MGI Symbol;Acc:MGI:98248]
ENSMUSG00000022641	1118.45	0.142499	0.0556214	2.56195	0.0104087	0.0876825	1194.13	1077.75	1210.56	1168.39	1184.99	997.885	1094.52	1070.99	1066.82	Bbx	70508	bobby sox HMG box containing [Source:MGI Symbol;Acc:MGI:1917758]
ENSMUSG00000024511	121.672	-0.393047	0.153409	-2.56209	0.0104044	0.0876825	112.763	86.4967	111.597	110.603	113.204	134.598	123.257	171.931	130.595	Rab27b	80718	RAB27B, member RAS oncogene family [Source:MGI Symbol;Acc:MGI:1931295]
ENSMUSG00000022817	1531.08	-0.17515	0.0684046	-2.5605	0.0104522	0.0879515	1567.12	1323.4	1320.03	1503.73	1525.52	1626.01	1750.25	1530.37	1633.32	Itgb5	16419	integrin beta 5 [Source:MGI Symbol;Acc:MGI:96614]
ENSMUSG00000041477	482.511	0.268234	0.104762	2.56041	0.0104548	0.0879515	454.908	541.47	498.467	537.719	576.975	495.848	468.377	380.577	388.255	Dcp1b	319618	decapping mRNA 1B [Source:MGI Symbol;Acc:MGI:2442404]
ENSMUSG00000040883	186.817	-0.278087	0.108673	-2.55895	0.010499	0.088264	161.917	157.424	161.55	181.201	191.717	206.539	205.1	201.482	214.422	Tmem205	235043	transmembrane protein 205 [Source:MGI Symbol;Acc:MGI:3045495]
ENSMUSG00000030701	1952.47	-0.317278	0.124034	-2.55799	0.0105279	0.0884474	1386.89	1681.5	1746.23	1901.43	2085.15	2120.31	1689.11	2409.72	2551.89	Plekhb1	27276	pleckstrin homology domain containing, family B (evectins) member 1 [Source:MGI Symbol;Acc:MGI:1351469]
ENSMUSG00000040125	270.082	0.469653	0.183641	2.55745	0.0105444	0.088526	317.087	467.082	235.948	272.978	246.493	203.445	223.835	222.973	240.894	Gpr26	NA	G protein-coupled receptor 26 [Source:MGI Symbol;Acc:MGI:2441758]
ENSMUSG00000044229	131.697	0.372225	0.145616	2.55621	0.0105819	0.0887813	120.474	159.154	145.607	148.255	157.938	93.6001	129.173	112.83	118.241	Nxpe4	244853	neurexophilin and PC-esterase domain family, member 4 [Source:MGI Symbol;Acc:MGI:1924792]
ENSMUSG00000030045	616.534	-0.167738	0.0656469	-2.55516	0.010614	0.0889903	560.925	576.068	617.503	597.727	570.585	611.882	655.728	690.411	667.974	Mrpl19	56284	mitochondrial ribosomal protein L19 [Source:MGI Symbol;Acc:MGI:1926274]
ENSMUSG00000022553	2234.48	-0.171624	0.0671744	-2.5549	0.010622	0.0889975	1987.33	2052.57	2178.8	2088.52	2273.21	2493.94	2062.83	2469.72	2503.36	Maf1	68877	MAF1 homolog, negative regulator of RNA polymerase III [Source:MGI Symbol;Acc:MGI:1916127]
ENSMUSG00000034206	441.959	0.230876	0.0904729	2.55188	0.0107143	0.0896504	457.8	476.597	525.037	431.823	472.901	403.022	452.6	353.713	404.138	Polq	77782	polymerase (DNA directed), theta [Source:MGI Symbol;Acc:MGI:2155399]
ENSMUSG00000040331	2025.02	-0.17076	0.066914	-2.55193	0.010713	0.0896504	1757.95	1863.14	2104.4	1981.44	1885.21	2092.47	1958.31	2294.21	2288.05	Nsmce4a	67872	NSE4 homolog A, SMC5-SMC6 complex component [Source:MGI Symbol;Acc:MGI:1915122]
ENSMUSG00000030323	707.496	-0.164693	0.0645457	-2.55158	0.0107237	0.0896687	719.95	625.371	636.634	665.972	708.438	748.027	774.054	753.095	735.919	Ift122	81896	intraflagellar transport 122 [Source:MGI Symbol;Acc:MGI:1932386]
ENSMUSG00000078919	274.211	0.285225	0.111797	2.55128	0.0107328	0.0896846	293.956	326.958	294.403	290.627	283.923	278.48	264.263	199.691	235.6	Dpm1	13480	dolichol-phosphate (beta-D) mannosyltransferase 1 [Source:MGI Symbol;Acc:MGI:1330239]
ENSMUSG00000020903	322.961	-0.229128	0.0898177	-2.55103	0.0107404	0.0896884	280.463	297.549	296.529	336.516	290.314	331.855	330.329	370.727	372.371	Stx8	55943	syntaxin 8 [Source:MGI Symbol;Acc:MGI:1890156]
ENSMUSG00000023072	977.237	-0.153259	0.0600896	-2.55052	0.0107564	0.0897613	991.739	876.212	974.614	909.534	904.719	1093.03	985.07	1014.57	1045.64	Cep89	NA	centrosomal protein 89 [Source:MGI Symbol;Acc:MGI:1919390]
ENSMUSG00000044502	1419.45	-0.146679	0.057531	-2.54957	0.0107856	0.0899448	1332.92	1385.68	1415.69	1367.24	1274.46	1429.53	1408.09	1557.23	1604.2	Bod1	69556	biorientation of chromosomes in cell division 1 [Source:MGI Symbol;Acc:MGI:1916806]
ENSMUSG00000039842	317.353	0.228513	0.0896522	2.54889	0.0108067	0.0900606	322.869	347.717	315.66	334.163	375.217	282.347	315.538	281.179	281.485	Mcph1	244329	microcephaly, primary autosomal recessive 1 [Source:MGI Symbol;Acc:MGI:2443308]
ENSMUSG00000024352	167.92	-0.312891	0.122855	-2.54683	0.0108706	0.0905325	134.93	139.26	147.733	163.551	173.458	202.671	176.504	175.513	197.657	Spata24	71242	spermatogenesis associated 24 [Source:MGI Symbol;Acc:MGI:1918492]
ENSMUSG00000010205	2017.39	0.190671	0.0748804	2.54634	0.0108859	0.0905996	2242.74	1911.58	2067.2	2174.41	2279.6	2049.92	1963.24	1633.35	1834.5	Raver1	71766	ribonucleoprotein, PTB-binding 1 [Source:MGI Symbol;Acc:MGI:1919016]
ENSMUSG00000031737	969.002	0.242929	0.0954838	2.54419	0.0109532	0.0910985	1268.35	877.942	1005.44	1050.73	1002.4	918.983	814.483	863.238	919.457	Irx5	54352	Iroquois homeobox 5 [Source:MGI Symbol;Acc:MGI:1859086]
ENSMUSG00000033419	1821.75	0.16504	0.0648953	2.54317	0.0109852	0.091304	1915.05	2171.07	1845.07	1827.3	1807.61	1729.67	1739.4	1777.52	1583.02	Snap91	20616	synaptosomal-associated protein 91 [Source:MGI Symbol;Acc:MGI:109132]
ENSMUSG00000021764	1130.78	-0.185323	0.0729101	-2.5418	0.0110283	0.091381	1063.06	1064.77	1157.42	1001.31	1043.49	1199.01	1054.09	1304.71	1289.18	Ndufs4	17993	NADH:ubiquinone oxidoreductase core subunit S4 [Source:MGI Symbol;Acc:MGI:1343135]
ENSMUSG00000023913	261.166	-0.362854	0.142725	-2.54232	0.0110118	0.091381	208.178	249.111	227.445	224.736	247.406	238.255	394.423	283.866	277.073	Pla2g7	27226	phospholipase A2, group VII (platelet-activating factor acetylhydrolase, plasma) [Source:MGI Symbol;Acc:MGI:1351327]
ENSMUSG00000024614	1292.89	-0.128023	0.050362	-2.54205	0.0110203	0.091381	1326.17	1207.49	1224.38	1186.04	1262.59	1369.97	1393.3	1355.75	1310.36	Tmx3	67988	thioredoxin-related transmembrane protein 3 [Source:MGI Symbol;Acc:MGI:2442418]
ENSMUSG00000056895	691.121	-0.230274	0.0905981	-2.54171	0.0110311	0.091381	608.151	600.287	614.315	728.333	660.053	742.612	638.965	801.45	825.923	H2bu2	NA	H2B.U histone 2 [Source:MGI Symbol;Acc:MGI:1925553]
ENSMUSG00000091537	1016.95	-0.344333	0.135457	-2.54201	0.0110216	0.091381	706.457	1050.07	1160.61	847.173	776.908	1132.48	969.294	1271.57	1238	Tma7	NA	translational machinery associated 7 [Source:MGI Symbol;Acc:MGI:1913417]
ENSMUSG00000039126	541.74	0.193781	0.07625	2.54139	0.0110414	0.0914049	569.599	531.09	586.681	601.257	581.54	489.66	483.168	561.463	471.2	Prune2	353211	prune homolog 2 [Source:MGI Symbol;Acc:MGI:1925004]
ENSMUSG00000026959	462.314	0.409612	0.161195	2.54109	0.0110506	0.0914208	444.307	773.281	417.692	502.421	458.294	378.268	361.883	398.486	426.198	Grin1	14810	glutamate receptor, ionotropic, NMDA1 (zeta 1) [Source:MGI Symbol;Acc:MGI:95819]
ENSMUSG00000015937	4304	0.124784	0.0491379	2.53947	0.011102	0.0917842	4253.2	4388.84	4641.37	4781.82	4282.58	4316.43	4123.69	3890.84	4057.26	Macroh2a1	26914	macroH2A.1 histone [Source:MGI Symbol;Acc:MGI:1349392]
ENSMUSG00000042745	995.176	-0.175965	0.0692981	-2.53924	0.0111093	0.0917842	1028.36	832.964	938.478	966.012	941.237	1104.64	1027.47	1004.72	1112.7	Id1	15901	inhibitor of DNA binding 1, HLH protein [Source:MGI Symbol;Acc:MGI:96396]
ENSMUSG00000010066	999.741	0.197472	0.0777922	2.53845	0.0111343	0.091866	1118.96	926.38	962.923	1191.92	1101.91	932.907	902.242	928.608	931.811	Cacna2d2	56808	calcium channel, voltage-dependent, alpha 2/delta subunit 2 [Source:MGI Symbol;Acc:MGI:1929813]
ENSMUSG00000024043	291.124	0.249636	0.09835	2.53824	0.0111413	0.091866	335.399	288.034	313.534	301.217	326.831	234.387	284.97	250.733	285.014	Arhgap28	268970	Rho GTPase activating protein 28 [Source:MGI Symbol;Acc:MGI:2147003]
ENSMUSG00000055897	900.537	0.236601	0.0932067	2.53845	0.0111343	0.091866	843.315	883.997	1004.37	1157.8	941.237	901.191	773.068	789.809	810.04	Ppp4r1l-ps	NA	protein phosphatase 4, regulatory subunit 1-like, pseudogene [Source:MGI Symbol;Acc:MGI:1924560]
ENSMUSG00000044927	3638.93	0.171169	0.0674574	2.53744	0.0111668	0.092015	3346.28	3705.52	3751.78	4362.94	3983.14	3417.56	3266.81	3452.06	3464.29	H1f10	NA	H1.10 linker histone [Source:MGI Symbol;Acc:MGI:2685307]
ENSMUSG00000018707	12237.9	0.140305	0.0553011	2.53711	0.011177	0.0920389	12856	13776.3	12262.9	11687.5	13229.4	10730.7	11716.3	12239.4	11642.3	Dync1h1	13424	dynein cytoplasmic 1 heavy chain 1 [Source:MGI Symbol;Acc:MGI:103147]
ENSMUSG00000020430	1583.11	-0.122885	0.0484527	-2.53619	0.0112067	0.0922223	1493.87	1498.99	1543.23	1526.09	1553.82	1636.07	1550.08	1756.92	1688.91	Pes1	64934	pescadillo ribosomal biogenesis factor 1 [Source:MGI Symbol;Acc:MGI:1890613]
ENSMUSG00000024862	1253.07	0.131825	0.0519942	2.53539	0.0112324	0.0923114	1306.9	1314.75	1330.66	1329.59	1239.77	1238.46	1116.22	1165.91	1235.36	Klc2	16594	kinesin light chain 2 [Source:MGI Symbol;Acc:MGI:107953]
ENSMUSG00000046985	977.015	0.152093	0.0599841	2.53555	0.0112271	0.0923114	923.31	1048.34	1053.26	1070.73	1018.84	932.907	873.646	942.935	929.164	Tapt1	231225	transmembrane anterior posterior transformation 1 [Source:MGI Symbol;Acc:MGI:2683537]
ENSMUSG00000051483	573.42	-0.163894	0.0646577	-2.53479	0.0112515	0.092408	526.229	538.875	535.666	543.603	577.888	631.221	577.829	624.146	605.324	Cbr1	NA	carbonyl reductase 1 [Source:MGI Symbol;Acc:MGI:88284]
ENSMUSG00000008682	2395.68	-0.127101	0.05015	-2.53441	0.0112636	0.0924461	2157.92	2279.19	2396.68	2389.73	2285.08	2361.66	2463.17	2621.06	2606.6	Rpl10	110954	ribosomal protein L10 [Source:MGI Symbol;Acc:MGI:105943]
ENSMUSG00000019996	3623.7	0.139476	0.0550444	2.53387	0.011281	0.0925277	3915.88	3446.89	4036.62	3846.4	3650.83	3668.2	3396.96	3326.69	3324.87	Map7	17761	microtubule-associated protein 7 [Source:MGI Symbol;Acc:MGI:1328328]
ENSMUSG00000006378	271.661	-0.275485	0.108732	-2.53361	0.0112895	0.0925371	212.034	233.541	264.644	251.799	281.184	323.346	275.11	283.866	319.428	Gcat	26912	glycine C-acetyltransferase (2-amino-3-ketobutyrate-coenzyme A ligase) [Source:MGI Symbol;Acc:MGI:1349389]
ENSMUSG00000029121	7497.19	0.178457	0.0704554	2.53291	0.011312	0.0925992	7399.01	9435.93	7211.29	7724.57	7757.22	7061.78	6842.25	7145.89	6896.81	Crmp1	12933	collapsin response mediator protein 1 [Source:MGI Symbol;Acc:MGI:107793]
ENSMUSG00000089832	284.458	0.22611	0.0892676	2.53295	0.0113107	0.0925992	320.942	304.468	283.775	314.16	297.617	280.027	262.291	245.36	251.483	Shkbp1	192192	Sh3kbp1 binding protein 1 [Source:MGI Symbol;Acc:MGI:2385803]
ENSMUSG00000040771	790.167	-0.178386	0.0704352	-2.53263	0.0113211	0.0926127	670.797	755.116	810.938	757.749	739.478	846.269	796.734	820.255	914.163	Oard1	106821	O-acyl-ADP-ribose deacylase 1 [Source:MGI Symbol;Acc:MGI:2146818]
ENSMUSG00000039361	2679.08	0.141143	0.055741	2.53212	0.0113376	0.0926868	2735.23	2908.89	2991.86	2656.83	2680.38	2582.9	2630.8	2611.21	2313.64	Picalm	233489	phosphatidylinositol binding clathrin assembly protein [Source:MGI Symbol;Acc:MGI:2385902]
ENSMUSG00000041000	274.4	0.24473	0.0967007	2.5308	0.0113802	0.0929742	319.014	297.549	274.21	281.214	302.182	269.971	247.5	221.182	256.777	Trim62	67525	tripartite motif-containing 62 [Source:MGI Symbol;Acc:MGI:1914775]
ENSMUSG00000020300	1182.95	0.155079	0.0613403	2.52818	0.0114655	0.0935534	1152.69	1364.05	1201	1249.58	1226.99	1127.84	1119.17	1157.85	1047.4	Cpeb4	67579	cytoplasmic polyadenylation element binding protein 4 [Source:MGI Symbol;Acc:MGI:1914829]
ENSMUSG00000035722	279.125	0.246595	0.0975394	2.52816	0.0114661	0.0935534	323.833	281.114	273.147	297.687	325.005	259.141	227.779	260.583	263.837	Abca7	27403	ATP-binding cassette, sub-family A (ABC1), member 7 [Source:MGI Symbol;Acc:MGI:1351646]
ENSMUSG00000026274	1129.13	0.134418	0.0531878	2.52724	0.0114964	0.0936782	1164.26	1101.1	1188.24	1241.34	1184.99	1075.24	1118.19	1036.06	1052.7	Pask	269224	PAS domain containing serine/threonine kinase [Source:MGI Symbol;Acc:MGI:2155936]
ENSMUSG00000055675	1237.47	0.593635	0.23489	2.52728	0.0114948	0.0936782	1680.85	1425.47	1492.21	1329.59	1350.23	624.259	717.849	1281.43	1235.36	Kbtbd11	74901	kelch repeat and BTB (POZ) domain containing 11 [Source:MGI Symbol;Acc:MGI:1922151]
ENSMUSG00000002249	374.587	0.219265	0.0867957	2.52622	0.0115298	0.0938886	409.61	353.772	407.063	443.589	386.172	354.288	352.022	324.162	340.605	Tead3	21678	TEA domain family member 3 [Source:MGI Symbol;Acc:MGI:109241]
ENSMUSG00000016200	489.416	0.190106	0.075315	2.52414	0.011598	0.0942298	511.772	506.006	513.346	548.309	511.244	463.359	431.893	499.675	419.138	Syt14	329324	synaptotagmin XIV [Source:MGI Symbol;Acc:MGI:2444490]
ENSMUSG00000020882	505.647	0.189002	0.0748639	2.52461	0.0115828	0.0942298	513.7	595.097	514.409	553.016	497.55	469.548	472.321	472.811	462.376	Cacnb1	12295	calcium channel, voltage-dependent, beta 1 subunit [Source:MGI Symbol;Acc:MGI:102522]
ENSMUSG00000028322	614.102	-0.179967	0.0713017	-2.52403	0.0116019	0.0942298	565.744	545.794	652.577	583.608	554.152	690.011	648.825	642.056	644.15	Exosc3	66362	exosome component 3 [Source:MGI Symbol;Acc:MGI:1913612]
ENSMUSG00000036167	1105.71	0.140616	0.0557046	2.52431	0.0115925	0.0942298	1083.3	1162.52	1222.25	1197.81	1101.91	1043.53	1084.66	1048.6	1006.81	Pphln1	223828	periphilin 1 [Source:MGI Symbol;Acc:MGI:1917029]
ENSMUSG00000029472	6528.09	0.0748992	0.0296896	2.52274	0.0116445	0.0945137	6553.77	6615.27	6647.99	6849.16	6729.25	6516.42	6366.97	6250.42	6223.54	Anapc5	59008	anaphase-promoting complex subunit 5 [Source:MGI Symbol;Acc:MGI:1929722]
ENSMUSG00000024968	3152.25	0.163765	0.0649414	2.52174	0.0116777	0.0946948	3690.35	3092.26	3510.52	3275.73	2984.39	3066.37	2806.32	2936.26	3008.09	Rcor2	104383	REST corepressor 2 [Source:MGI Symbol;Acc:MGI:1859854]
ENSMUSG00000028680	186.137	0.316327	0.125446	2.52161	0.011682	0.0946948	168.663	195.483	232.759	216.5	207.236	174.05	177.49	147.753	155.302	Plk3	12795	polo like kinase 3 [Source:MGI Symbol;Acc:MGI:109604]
ENSMUSG00000020423	3414.79	-0.266091	0.105598	-2.51985	0.0117405	0.0949565	4132.73	2773.95	2957.85	2780.37	3019.08	4074.31	3437.39	3722.49	3834.9	Btg2	NA	BTG anti-proliferation factor 2 [Source:MGI Symbol;Acc:MGI:108384]
ENSMUSG00000020900	7231.77	0.121357	0.0481574	2.52	0.0117356	0.0949565	7809.58	7813.25	7716.13	7091.54	7069.78	6856.79	7336.26	6735.76	6656.8	Myh10	77579	myosin, heavy polypeptide 10, non-muscle [Source:MGI Symbol;Acc:MGI:1930780]
ENSMUSG00000026360	960.922	-0.254191	0.10089	-2.51949	0.0117524	0.0949565	1088.12	819.124	944.854	816.58	757.737	1073.69	954.503	1090.69	1103	Rgs2	19735	regulator of G-protein signaling 2 [Source:MGI Symbol;Acc:MGI:1098271]
ENSMUSG00000030629	1590	-0.139108	0.0552111	-2.51957	0.0117497	0.0949565	1604.71	1449.69	1593.18	1466.08	1496.3	1732.76	1549.09	1738.12	1680.08	Zfand6	65098	zinc finger, AN1-type domain 6 [Source:MGI Symbol;Acc:MGI:1929510]
ENSMUSG00000081888	102.379	-0.374511	0.14864	-2.51958	0.0117496	0.0949565	92.5238	89.9566	96.7174	91.777	81.2513	116.807	139.034	107.457	105.888	Spcs2-ps	NA	signal peptidase complex subunit 2, pseudogene [Source:MGI Symbol;Acc:MGI:3650451]
ENSMUSG00000053113	261.369	-0.273189	0.108502	-2.51782	0.0118083	0.0953467	241.911	233.541	239.136	255.328	228.234	341.138	249.472	282.075	281.485	Socs3	12702	suppressor of cytokine signaling 3 [Source:MGI Symbol;Acc:MGI:1201791]
ENSMUSG00000030706	515.509	-0.186499	0.0741024	-2.51678	0.0118434	0.0955682	441.415	487.842	533.54	489.478	477.465	543.809	524.582	578.477	562.969	Mrpl48	52443	mitochondrial ribosomal protein L48 [Source:MGI Symbol;Acc:MGI:1289321]
ENSMUSG00000016427	684.656	-0.229595	0.0912393	-2.5164	0.011856	0.0956075	566.708	686.784	696.153	634.203	594.321	640.503	820.399	772.795	750.037	Ndufa1	NA	NADH:ubiquinone oxidoreductase subunit A1 [Source:MGI Symbol;Acc:MGI:1929511]
ENSMUSG00000024925	551.006	-0.208279	0.0827929	-2.51566	0.0118811	0.0956243	507.917	482.652	590.933	476.535	520.373	619.617	546.275	582.954	631.796	Rnaseh2c	NA	ribonuclease H2, subunit C [Source:MGI Symbol;Acc:MGI:1915459]
ENSMUSG00000058492	210.154	-0.246106	0.0978269	-2.51573	0.0118787	0.0956243	179.265	198.942	197.686	200.027	194.455	221.237	235.668	239.092	225.011	Scp2-ps2	NA	sterol carrier protein 2, pseudogene 2 [Source:MGI Symbol;Acc:MGI:107679]
ENSMUSG00000091337	4061.97	-0.183489	0.0729302	-2.51596	0.011871	0.0956243	3366.52	4197.69	3549.85	3975.83	4064.39	4141.61	4047.76	4717.36	4496.69	Eid1	NA	EP300 interacting inhibitor of differentiation 1 [Source:MGI Symbol;Acc:MGI:1889651]
ENSMUSG00000049760	569.969	-0.190039	0.075564	-2.51494	0.0119054	0.0957582	491.532	499.086	543.105	575.371	574.237	584.807	590.648	623.251	647.679	Micos13	224904	mitochondrial contact site and cristae organizing system subunit 13 [Source:MGI Symbol;Acc:MGI:2442174]
ENSMUSG00000040118	981.066	0.24194	0.096313	2.51202	0.0120042	0.0963924	905.962	1246.42	954.42	1137.8	1020.66	804.497	950.559	931.294	877.985	Cacna2d1	12293	calcium channel, voltage-dependent, alpha2/delta subunit 1 [Source:MGI Symbol;Acc:MGI:88295]
ENSMUSG00000055912	93.8139	0.517167	0.205913	2.51159	0.012019	0.0963924	99.2703	150.504	89.2776	102.367	99.51	83.5439	93.6754	59.9968	66.1798	Tmem150a	232086	transmembrane protein 150A [Source:MGI Symbol;Acc:MGI:2385244]
ENSMUSG00000061603	705.944	0.223296	0.0889047	2.51163	0.0120174	0.0963924	778.742	856.318	647.263	708.331	775.996	587.901	702.072	647.429	649.444	Akap6	238161	A kinase (PRKA) anchor protein 6 [Source:MGI Symbol;Acc:MGI:3050566]
ENSMUSG00000074024	147.748	-0.357818	0.142473	-2.51147	0.0120229	0.0963924	163.844	105.526	137.105	122.369	127.811	167.861	183.407	162.976	158.831	4632427E13Rik	NA	RIKEN cDNA 4632427E13 gene [Source:MGI Symbol;Acc:MGI:1915436]
ENSMUSG00000090112	1366.34	0.116735	0.0464722	2.51192	0.0120076	0.0963924	1440.86	1444.5	1425.25	1344.89	1417.79	1286.42	1314.41	1357.54	1265.36	Shprh	268281	SNF2 histone linker PHD RING helicase [Source:MGI Symbol;Acc:MGI:1917581]
ENSMUSG00000041313	883.227	0.192795	0.0768599	2.5084	0.0121281	0.0971727	851.026	1053.53	886.399	928.36	954.931	838.533	890.409	778.168	767.685	Slc7a1	11987	solute carrier family 7 (cationic amino acid transporter, y+ system), member 1 [Source:MGI Symbol;Acc:MGI:88117]
ENSMUSG00000030761	407.801	-0.502494	0.200458	-2.50673	0.0121853	0.0975683	349.855	307.928	339.042	344.752	378.868	335.723	320.468	602.655	690.917	Myo7a	17921	myosin VIIA [Source:MGI Symbol;Acc:MGI:104510]
ENSMUSG00000093904	2432.84	-0.185096	0.073853	-2.50627	0.0122012	0.0976331	2096.24	2497.16	2239.38	2234.42	2397.37	2343.87	2425.7	2836.87	2824.55	Tomm20	67952	translocase of outer mitochondrial membrane 20 [Source:MGI Symbol;Acc:MGI:1915202]
ENSMUSG00000105340	53.8446	0.480686	0.191837	2.50569	0.0122211	0.0977296	53.9722	63.1426	63.7697	67.0678	60.2538	46.4133	47.3307	40.2964	42.355	Gm42878	NA	predicted gene 42878 [Source:MGI Symbol;Acc:MGI:5663015]
ENSMUSG00000053460	232.006	0.254075	0.101441	2.50466	0.0122568	0.097827	267.933	219.702	263.581	238.856	260.187	218.916	210.03	201.482	207.363	Ggcx	56316	gamma-glutamyl carboxylase [Source:MGI Symbol;Acc:MGI:1927655]
ENSMUSG00000069729	2813.59	0.13382	0.0534214	2.50499	0.0122455	0.097827	2688.97	2940.02	2996.11	2886.27	3131.37	2508.64	2639.67	2744.63	2786.61	Arid1b	239985	AT rich interactive domain 1B (SWI-like) [Source:MGI Symbol;Acc:MGI:1926129]
ENSMUSG00000086841	445.114	-0.245802	0.0981312	-2.50483	0.0122509	0.097827	406.719	404.805	414.503	430.646	400.779	490.434	390.478	540.867	526.791	2410006H16Rik	69221	RIKEN cDNA 2410006H16 gene [Source:MGI Symbol;Acc:MGI:1916471]
ENSMUSG00000060373	4431.84	-0.111707	0.0446097	-2.5041	0.0122764	0.0979206	4134.66	4207.2	4541.47	4378.24	4136.51	4609.61	4364.29	4815.87	4698.76	Hnrnpc	15381	heterogeneous nuclear ribonucleoprotein C [Source:MGI Symbol;Acc:MGI:107795]
ENSMUSG00000026223	1066.61	-0.166793	0.0666514	-2.50247	0.0123329	0.0983082	917.527	1055.26	940.603	1086.03	1057.18	1063.64	1165.52	1156.06	1157.7	Itm2c	NA	integral membrane protein 2C [Source:MGI Symbol;Acc:MGI:1927594]
ENSMUSG00000022403	3698.15	-0.0803073	0.0320999	-2.5018	0.0123565	0.0984336	3605.54	3683.9	3555.16	3614.6	3573.23	3891.75	3800.26	3707.27	3851.66	St13	NA	suppression of tumorigenicity 13 [Source:MGI Symbol;Acc:MGI:1917606]
ENSMUSG00000001151	2230.12	-0.206568	0.0826245	-2.50008	0.0124165	0.0987396	2327.55	1987.69	2134.16	1883.78	2103.4	2377.91	2067.76	2441.07	2747.78	Pcnt	18541	pericentrin (kendrin) [Source:MGI Symbol;Acc:MGI:102722]
ENSMUSG00000031176	750.301	-0.210484	0.084193	-2.50002	0.0124187	0.0987396	646.703	637.481	764.174	690.681	767.779	749.574	788.845	908.907	798.569	Dynlt3	67117	dynein light chain Tctex-type 3 [Source:MGI Symbol;Acc:MGI:1914367]
ENSMUSG00000039958	79.6018	-0.473587	0.189418	-2.50022	0.0124115	0.0987396	70.3566	56.2229	88.2148	55.3016	69.3831	87.4117	89.7311	85.9656	113.829	Etfbkmt	320204	electron transfer flavoprotein beta subunit lysine methyltransferase [Source:MGI Symbol;Acc:MGI:2443575]
ENSMUSG00000014837	1726.11	0.16083	0.0643473	2.4994	0.0124404	0.0987867	1663.5	2056.03	1721.78	1813.19	1799.4	1677.84	1634.88	1551.86	1616.55	4931428F04Rik	74356	RIKEN cDNA 4931428F04 gene [Source:MGI Symbol;Acc:MGI:1921606]
ENSMUSG00000028799	1263.79	0.159019	0.0636229	2.4994	0.0124405	0.0987867	1253.89	1319.94	1283.9	1409.6	1360.27	1267.08	1253.28	1078.15	1148	Zfp362	230761	zinc finger protein 362 [Source:MGI Symbol;Acc:MGI:2652839]
ENSMUSG00000032827	2536.27	0.105615	0.0422723	2.49844	0.0124741	0.0989907	2534.77	2626.04	2608.18	2583.88	2735.16	2348.51	2566.71	2418.68	2404.53	Ppp1r9a	243725	protein phosphatase 1, regulatory subunit 9A [Source:MGI Symbol;Acc:MGI:2442401]
ENSMUSG00000028163	634.121	-0.188652	0.0755219	-2.49798	0.0124905	0.0989941	689.109	574.338	597.31	568.312	555.978	692.331	699.114	660.861	669.739	Nfkb1	18033	nuclear factor of kappa light polypeptide gene enhancer in B cells 1, p105 [Source:MGI Symbol;Acc:MGI:97312]
ENSMUSG00000051319	131.812	-0.36721	0.146994	-2.49813	0.0124851	0.0989941	120.474	98.6063	128.602	108.25	127.811	129.184	139.034	175.513	158.831	Mtln	NA	mitoregulin [Source:MGI Symbol;Acc:MGI:1915135]
ENSMUSG00000028179	220.496	-0.276864	0.110848	-2.49769	0.0125004	0.0990101	231.309	179.913	201.937	202.38	193.542	271.518	224.821	234.615	244.424	Cth	107869	cystathionase (cystathionine gamma-lyase) [Source:MGI Symbol;Acc:MGI:1339968]
ENSMUSG00000006262	1005.63	0.167712	0.0671539	2.49742	0.01251	0.0990227	955.115	1065.64	1069.21	1124.86	1072.7	1005.62	984.084	893.684	879.75	Mob1b	NA	MOB kinase activator 1B [Source:MGI Symbol;Acc:MGI:1915723]
ENSMUSG00000025893	154.969	-0.363021	0.145429	-2.49621	0.012553	0.0992999	159.989	136.665	156.236	109.426	125.072	181.785	146.922	186.259	192.362	Kbtbd3	69149	kelch repeat and BTB (POZ) domain containing 3 [Source:MGI Symbol;Acc:MGI:1916399]
ENSMUSG00000028458	918.624	0.153758	0.0616293	2.49488	0.0126	0.0996089	897.288	1058.72	968.237	958.952	925.717	890.361	858.855	865.029	844.454	Tesk1	21754	testis specific protein kinase 1 [Source:MGI Symbol;Acc:MGI:1201675]
ENSMUSG00000003352	1710.34	0.127985	0.051327	2.49352	0.0126482	0.0999262	1750.24	1936.66	1660.14	1797.89	1740.06	1619.82	1637.84	1609.17	1641.26	Cacnb3	12297	calcium channel, voltage-dependent, beta 3 subunit [Source:MGI Symbol;Acc:MGI:103307]
ENSMUSG00000021666	734.639	0.174512	0.0699926	2.4933	0.0126562	0.0999262	791.271	762.901	755.671	789.518	771.431	767.366	696.156	645.638	631.796	Gfm2	320806	G elongation factor, mitochondrial 2 [Source:MGI Symbol;Acc:MGI:2444783]
ENSMUSG00000032180	363.266	-0.201804	0.0810014	-2.49137	0.0127252	0.100407	350.819	325.228	309.283	349.459	367.913	391.419	381.604	389.532	404.138	Tmed1	NA	transmembrane p24 trafficking protein 1 [Source:MGI Symbol;Acc:MGI:106201]
ENSMUSG00000031708	3505.9	0.101672	0.0408188	2.49081	0.0127452	0.100502	3708.66	3636.32	3550.91	3576.95	3604.27	3552.16	3391.05	3168.19	3364.58	Tecr	106529	trans-2,3-enoyl-CoA reductase [Source:MGI Symbol;Acc:MGI:1915408]
ENSMUSG00000107176	1173.05	-0.194013	0.0779725	-2.48822	0.0128383	0.101171	958.006	1108.89	1206.31	1181.34	1059.92	1192.82	1173.41	1362.02	1314.77	Gm9794	NA	predicted pseudogene 9794 [Source:MGI Symbol;Acc:MGI:3642653]
ENSMUSG00000025571	2639.63	0.141139	0.0567366	2.48762	0.0128601	0.101258	3057.14	2823.25	2745.29	2618	2523.35	2501.68	2553.89	2455.39	2478.65	Tnrc6c	217351	trinucleotide repeat containing 6C [Source:MGI Symbol;Acc:MGI:2443265]
ENSMUSG00000066036	3733.31	0.153125	0.0615587	2.48747	0.0128655	0.101258	4253.2	3986.63	3734.78	3579.3	3982.23	3269.04	3832.8	3423.4	3538.41	Ubr4	69116	ubiquitin protein ligase E3 component n-recognin 4 [Source:MGI Symbol;Acc:MGI:1916366]
ENSMUSG00000019433	1208.18	-0.129998	0.0522673	-2.48718	0.0128761	0.101277	1177.75	1095.91	1146.79	1177.81	1201.42	1295.7	1249.33	1203.52	1325.36	Gipc1	67903	GIPC PDZ domain containing family, member 1 [Source:MGI Symbol;Acc:MGI:1926252]
ENSMUSG00000041881	1031.01	-0.176037	0.0708035	-2.48627	0.012909	0.101408	863.555	999.902	1042.63	1014.25	955.844	1114.69	998.875	1117.55	1171.82	Ndufa7	66416	NADH:ubiquinone oxidoreductase subunit A7 [Source:MGI Symbol;Acc:MGI:1913666]
ENSMUSG00000067220	52.4404	-0.938901	0.377602	-2.48648	0.0129014	0.101408	53.0084	13.8395	30.822	42.3586	46.5597	58.7901	36.4841	86.8611	103.24	Cnga1	12788	cyclic nucleotide gated channel alpha 1 [Source:MGI Symbol;Acc:MGI:88436]
ENSMUSG00000026434	4147.85	0.102995	0.0414345	2.48572	0.012929	0.101501	4063.33	4355.98	4490.45	4386.47	4099.08	3904.9	4082.27	4013.52	3934.61	Nucks1	98415	nuclear casein kinase and cyclin-dependent kinase substrate 1 [Source:MGI Symbol;Acc:MGI:1934811]
ENSMUSG00000049630	282.656	-0.360978	0.145266	-2.48494	0.0129572	0.101594	267.933	191.158	246.576	270.625	279.358	295.498	257.361	386.845	348.547	C1ql3	NA	C1q-like 3 [Source:MGI Symbol;Acc:MGI:2387350]
ENSMUSG00000026880	265.441	-0.266916	0.107425	-2.48469	0.0129666	0.101604	236.128	226.621	235.948	232.973	284.836	265.329	276.096	310.73	320.31	Stom	13830	stomatin [Source:MGI Symbol;Acc:MGI:95403]
ENSMUSG00000059714	632.609	-0.149088	0.060016	-2.48414	0.0129864	0.101695	624.535	615.857	570.739	611.847	594.321	686.143	655.728	673.397	660.915	Flot1	14251	flotillin 1 [Source:MGI Symbol;Acc:MGI:1100500]
ENSMUSG00000067879	967.946	0.356136	0.143419	2.48319	0.0130213	0.101905	952.224	1197.11	1247.76	998.958	964.973	707.029	622.202	1005.62	1015.64	Vxn	76982	vexin [Source:MGI Symbol;Acc:MGI:1924232]
ENSMUSG00000029464	330.595	-0.242381	0.0976275	-2.48271	0.0130386	0.101976	348.892	256.895	310.346	302.394	311.311	373.627	341.176	368.936	361.783	Gpn3	68080	GPN-loop GTPase 3 [Source:MGI Symbol;Acc:MGI:1289326]
ENSMUSG00000037887	1465.07	0.14577	0.0587258	2.48222	0.0130567	0.10199	1653.86	1607.97	1450.76	1503.73	1436.05	1456.6	1342.02	1396.05	1338.6	Dusp8	18218	dual specificity phosphatase 8 [Source:MGI Symbol;Acc:MGI:106626]
ENSMUSG00000045302	1113.64	0.147458	0.0594056	2.48222	0.0130568	0.10199	1235.58	1089.86	1196.74	1189.57	1110.13	1103.86	1076.77	995.768	1024.46	Preb	50907	prolactin regulatory element binding [Source:MGI Symbol;Acc:MGI:1355326]
ENSMUSG00000035232	460.672	0.181368	0.0731519	2.47933	0.0131629	0.102755	469.365	454.108	510.158	494.184	503.941	428.549	433.865	447.738	404.138	Pdk3	236900	pyruvate dehydrogenase kinase, isoenzyme 3 [Source:MGI Symbol;Acc:MGI:2384308]
ENSMUSG00000041124	1483.96	-0.135654	0.0547315	-2.47853	0.0131924	0.102897	1410.02	1471.31	1496.46	1327.24	1403.18	1610.54	1466.27	1641.41	1529.19	Msantd4	78100	Myb/SANT-like DNA-binding domain containing 4 with coiled-coils [Source:MGI Symbol;Acc:MGI:1925350]
ENSMUSG00000047238	812.092	-0.163334	0.0659032	-2.47839	0.0131977	0.102897	683.326	819.989	771.613	789.518	790.602	869.475	846.037	902.639	835.63	Mageh1	75625	melanoma antigen, family H, 1 [Source:MGI Symbol;Acc:MGI:1922875]
ENSMUSG00000042111	772.1	-0.227662	0.0918856	-2.47767	0.0132243	0.103041	821.148	601.152	695.09	777.752	694.744	899.644	870.688	810.405	778.274	Ccdc115	69668	coiled-coil domain containing 115 [Source:MGI Symbol;Acc:MGI:1916918]
ENSMUSG00000041775	347.261	0.217336	0.0877662	2.47631	0.0132749	0.10337	390.335	365.881	363.487	384.758	348.742	351.194	295.817	329.535	295.603	Mapk1ip1	69546	mitogen-activated protein kinase 1 interacting protein 1 [Source:MGI Symbol;Acc:MGI:1916796]
ENSMUSG00000079157	434.41	0.233908	0.0945365	2.47426	0.0133513	0.1039	425.995	508.601	478.273	481.241	432.732	358.929	359.911	432.515	431.492	Fam155a	270028	family with sequence similarity 155, member A [Source:MGI Symbol;Acc:MGI:2142765]
ENSMUSG00000029098	514.084	0.174571	0.0705709	2.4737	0.0133721	0.103997	575.382	531.09	550.545	535.366	516.722	515.187	465.419	479.079	457.964	Acox3	80911	acyl-Coenzyme A oxidase 3, pristanoyl [Source:MGI Symbol;Acc:MGI:1933156]
ENSMUSG00000040459	2470.29	0.175798	0.0710895	2.47291	0.0134018	0.104163	2484.65	2557.71	2694.27	2922.75	2358.11	2403.43	2499.65	2160.78	2151.28	Arglu1	234023	arginine and glutamate rich 1 [Source:MGI Symbol;Acc:MGI:2442985]
ENSMUSG00000030532	594.189	-0.233958	0.0946266	-2.47243	0.0134197	0.104237	553.215	512.061	591.995	531.836	566.933	611.108	560.08	651.906	768.568	Hddc3	68695	HD domain containing 3 [Source:MGI Symbol;Acc:MGI:1915945]
ENSMUSG00000046182	114.569	0.624241	0.252591	2.47135	0.0134605	0.104489	113.727	219.702	137.105	96.4836	111.378	102.109	92.6893	59.1014	98.8284	Gsg1l	269994	GSG1-like [Source:MGI Symbol;Acc:MGI:2685483]
ENSMUSG00000014353	867.835	0.129599	0.0524535	2.47074	0.0134834	0.104602	883.795	912.54	911.907	936.597	868.202	833.892	823.357	835.478	804.746	Tmem87b	72477	transmembrane protein 87B [Source:MGI Symbol;Acc:MGI:1919727]
ENSMUSG00000046364	3093.14	-0.174192	0.0705137	-2.47033	0.013499	0.104657	2542.48	2980.68	3190.61	2981.58	2936	3009.13	3217.5	3602.5	3377.81	Rpl27a	26451	ribosomal protein L27A [Source:MGI Symbol;Acc:MGI:1347076]
ENSMUSG00000033751	470.352	-0.211906	0.0857932	-2.46997	0.0135126	0.104697	447.198	403.94	496.341	416.527	434.557	515.961	469.363	490.72	558.557	Gadd45gip1	NA	growth arrest and DNA-damage-inducible, gamma interacting protein 1 [Source:MGI Symbol;Acc:MGI:1914947]
ENSMUSG00000023951	1834.62	0.258726	0.10476	2.4697	0.0135228	0.104711	2463.45	1808.65	2085.27	1803.77	1734.58	1858.85	1726.59	1471.27	1559.2	Vegfa	22339	vascular endothelial growth factor A [Source:MGI Symbol;Acc:MGI:103178]
ENSMUSG00000001415	1806.38	0.0927572	0.0375656	2.46921	0.0135413	0.104789	1844.69	1876.98	1868.45	1843.78	1853.26	1717.29	1774.9	1730.06	1748.03	Smg5	229512	Smg-5 homolog, nonsense mediated mRNA decay factor (C. elegans) [Source:MGI Symbol;Acc:MGI:2447364]
ENSMUSG00000022881	700.21	-0.194001	0.0785764	-2.46894	0.0135513	0.104802	683.326	586.448	739.729	650.676	631.752	709.35	721.793	799.659	779.156	Rfc4	106344	replication factor C (activator 1) 4 [Source:MGI Symbol;Acc:MGI:2146571]
ENSMUSG00000028423	1902.61	0.0959185	0.038881	2.46698	0.0136259	0.105313	1968.06	1955.69	1975.8	1941.44	1952.77	1885.93	1846.88	1832.14	1764.79	Nfx1	74164	nuclear transcription factor, X-box binding 1 [Source:MGI Symbol;Acc:MGI:1921414]
ENSMUSG00000042589	500.539	0.324756	0.13166	2.46663	0.0136392	0.10535	498.279	735.222	440.011	582.431	492.072	423.134	446.684	436.992	450.022	Cux2	13048	cut-like homeobox 2 [Source:MGI Symbol;Acc:MGI:107321]
ENSMUSG00000024104	1939.88	0.120134	0.0487179	2.46591	0.0136666	0.105438	1869.75	1984.23	2047.01	2134.4	2022.15	1782.27	1894.21	1894.83	1830.09	Washc2	28006	WASH complex subunit 2` [Source:MGI Symbol;Acc:MGI:106463]
ENSMUSG00000079083	291.117	-0.245349	0.0994971	-2.46589	0.0136674	0.105438	314.195	253.435	273.147	241.209	262.926	334.176	293.845	324.162	322.957	Jrkl	77532	Jrk-like [Source:MGI Symbol;Acc:MGI:1924782]
ENSMUSG00000029403	166.575	0.396349	0.160782	2.46513	0.0136963	0.105595	177.337	250.841	164.738	160.022	178.935	147.749	116.355	157.604	145.595	Cdkl2	53886	cyclin-dependent kinase-like 2 (CDC2-related kinase) [Source:MGI Symbol;Acc:MGI:1858227]
ENSMUSG00000074607	3937.32	0.162973	0.0661234	2.46469	0.0137134	0.105662	3696.13	3896.68	4217.3	4557.08	4304.49	4022.48	3650.38	3533.55	3557.82	Tox2	269389	TOX high mobility group box family member 2 [Source:MGI Symbol;Acc:MGI:3611233]
ENSMUSG00000022516	625.569	-0.155658	0.0631783	-2.46378	0.0137479	0.105735	637.065	599.422	571.802	585.961	582.453	674.54	664.602	630.415	683.857	Nudt16l1	66911	nudix (nucleoside diphosphate linked moiety X)-type motif 16-like 1 [Source:MGI Symbol;Acc:MGI:1914161]
ENSMUSG00000024112	3286.79	0.271406	0.110147	2.46403	0.0137386	0.105735	2969.43	3544.64	3682.7	3612.25	3981.31	2681.14	2335.97	3289.08	3484.58	Cacna1h	58226	calcium channel, voltage-dependent, T type, alpha 1H subunit [Source:MGI Symbol;Acc:MGI:1928842]
ENSMUSG00000042156	1058.44	0.127696	0.0518294	2.46377	0.0137484	0.105735	1153.66	1119.27	1096.84	1097.79	1031.62	991.697	998.875	1002.04	1034.17	Dzip1	66573	DAZ interacting protein 1 [Source:MGI Symbol;Acc:MGI:1914311]
ENSMUSG00000032303	753.796	-0.16749	0.0679967	-2.46321	0.0137699	0.105836	755.611	731.762	700.404	724.803	661.879	793.667	730.668	845.329	840.042	Chrna3	110834	cholinergic receptor, nicotinic, alpha polypeptide 3 [Source:MGI Symbol;Acc:MGI:87887]
ENSMUSG00000029580	16579.5	0.152425	0.0618932	2.46271	0.013789	0.105917	15472.7	17612.5	16337.8	18513.1	18828.4	16396.3	16136.8	14757.4	15160.5	Actb	11461	actin, beta [Source:MGI Symbol;Acc:MGI:87904]
ENSMUSG00000002319	1069.38	0.163633	0.0664562	2.46227	0.0138061	0.105949	1083.3	1172.03	1022.44	1114.27	1219.68	986.282	1075.79	942.935	1007.7	Ipo4	75751	importin 4 [Source:MGI Symbol;Acc:MGI:1923001]
ENSMUSG00000034145	103.737	0.42513	0.172665	2.46216	0.0138102	0.105949	118.546	140.125	116.911	117.663	91.2936	69.6199	84.8009	97.6068	97.0636	Tmem63c	217733	transmembrane protein 63c [Source:MGI Symbol;Acc:MGI:2444386]
ENSMUSG00000026833	3924.11	0.130022	0.052821	2.46156	0.0138334	0.106062	3805.04	4126.76	3901.64	4338.23	4232.37	3739.36	3485.71	3955.31	3732.54	Olfm1	56177	olfactomedin 1 [Source:MGI Symbol;Acc:MGI:1860437]
ENSMUSG00000003346	1484.76	-0.174166	0.070764	-2.46123	0.0138463	0.106096	1392.68	1375.3	1380.61	1424.9	1451.57	1610.54	1359.77	1588.57	1778.91	Abhd17a	216169	abhydrolase domain containing 17A [Source:MGI Symbol;Acc:MGI:106388]
ENSMUSG00000005360	3419.88	0.12757	0.0518588	2.45995	0.0138956	0.106408	3829.13	3709.84	3604.05	3315.74	3307.57	3307.72	3217.5	3199.53	3287.81	Slc1a3	20512	solute carrier family 1 (glial high affinity glutamate transporter), member 3 [Source:MGI Symbol;Acc:MGI:99917]
ENSMUSG00000028982	459.26	-0.257431	0.104751	-2.45755	0.013989	0.107057	416.357	439.403	411.315	417.703	428.167	474.189	407.241	590.118	548.851	Slc25a33	70556	solute carrier family 25, member 33 [Source:MGI Symbol;Acc:MGI:1917806]
ENSMUSG00000003923	1184.41	-0.15647	0.0637293	-2.45523	0.0140793	0.107415	1109.32	1079.48	1181.87	1142.51	1124.74	1266.31	1108.33	1324.41	1322.71	Tfam	21780	transcription factor A, mitochondrial [Source:MGI Symbol;Acc:MGI:107810]
ENSMUSG00000014329	168.191	0.304679	0.124073	2.45564	0.0140636	0.107415	166.736	177.318	194.498	185.907	193.542	139.24	174.532	152.231	129.712	Bicc1	83675	BicC family RNA binding protein 1 [Source:MGI Symbol;Acc:MGI:1933388]
ENSMUSG00000026547	1698.58	0.229238	0.0933657	2.45527	0.014078	0.107415	1996.01	1566.46	1818.5	1822.6	1884.3	1829.46	1604.31	1402.31	1363.3	Tagln2	21346	transgelin 2 [Source:MGI Symbol;Acc:MGI:1312985]
ENSMUSG00000028438	432.695	0.215557	0.0878031	2.45501	0.0140882	0.107415	487.677	425.564	477.21	436.529	477.465	382.136	450.628	359.086	397.961	Kif24	109242	kinesin family member 24 [Source:MGI Symbol;Acc:MGI:1918345]
ENSMUSG00000030884	2788.23	-0.128278	0.0522557	-2.45481	0.0140961	0.107415	2550.19	2782.6	2800.55	2667.42	2587.26	2794.85	2769.83	3133.27	3008.09	Uqcrc2	67003	ubiquinol cytochrome c reductase core protein 2 [Source:MGI Symbol;Acc:MGI:1914253]
ENSMUSG00000034902	2713.83	0.110687	0.0450866	2.45499	0.0140887	0.107415	2711.14	3044.68	2773.98	2786.26	2712.33	2628.54	2581.5	2552.1	2633.95	Pip5k1c	18717	phosphatidylinositol-4-phosphate 5-kinase, type 1 gamma [Source:MGI Symbol;Acc:MGI:1298224]
ENSMUSG00000042246	58.8114	0.525994	0.214262	2.4549	0.0140922	0.107415	61.6825	84.7668	56.3299	65.8912	71.209	54.1488	56.2052	36.7145	42.355	Tmc7	209760	transmembrane channel-like gene family 7 [Source:MGI Symbol;Acc:MGI:2443317]
ENSMUSG00000023978	860.133	-0.292326	0.119099	-2.45448	0.0141089	0.107446	900.179	705.813	737.603	720.097	847.205	1031.15	710.947	1058.45	1029.76	Prph2	19133	peripherin 2 [Source:MGI Symbol;Acc:MGI:102791]
ENSMUSG00000024033	229.96	-0.293881	0.119767	-2.45377	0.0141368	0.107528	186.011	213.647	226.382	191.79	227.321	265.329	208.058	274.911	276.19	Rsph1	22092	radial spoke head 1 homolog (Chlamydomonas) [Source:MGI Symbol;Acc:MGI:1194909]
ENSMUSG00000092060	635.69	0.168832	0.0688027	2.45386	0.0141331	0.107528	693.928	679.864	645.137	660.089	661.879	539.941	582.759	617.878	639.738	Bend4	666938	BEN domain containing 4 [Source:MGI Symbol;Acc:MGI:3648414]
ENSMUSG00000033565	4786.65	0.144078	0.0587278	2.45331	0.0141547	0.107598	4987.61	5656.89	4806.11	4944.19	4592.98	4695.48	4515.15	4540.95	4340.51	Rbfox2	93686	RNA binding protein, fox-1 homolog (C. elegans) 2 [Source:MGI Symbol;Acc:MGI:1933973]
ENSMUSG00000073639	2045.54	-0.116792	0.0476262	-2.45226	0.0141964	0.107849	2025.88	1929.74	1976.86	1961.44	1965.55	2141.97	2034.23	2307.64	2066.57	Rab18	NA	RAB18, member RAS oncogene family [Source:MGI Symbol;Acc:MGI:102790]
ENSMUSG00000021024	2105.93	-0.125949	0.0513932	-2.45069	0.0142582	0.108233	1845.66	2113.12	2135.22	2016.74	2009.37	2213.91	2129.88	2282.57	2206.87	Psma6	26443	proteasome (prosome, macropain) subunit, alpha type 6 [Source:MGI Symbol;Acc:MGI:1347006]
ENSMUSG00000038722	981.375	-0.167802	0.0684756	-2.45054	0.0142643	0.108233	943.55	899.566	1045.82	900.121	864.55	1034.24	971.266	1081.73	1091.52	Bud31	231889	BUD31 homolog [Source:MGI Symbol;Acc:MGI:2141291]
ENSMUSG00000062647	2271.74	-0.136318	0.0556329	-2.45031	0.0142733	0.108235	1953.6	2261.89	2152.23	2177.94	2333.46	2404.21	2294.55	2390.92	2476.89	Rpl7a	27176	ribosomal protein L7A [Source:MGI Symbol;Acc:MGI:1353472]
ENSMUSG00000066477	202.131	-0.293558	0.119873	-2.44892	0.0143286	0.108589	195.649	153.099	210.44	187.084	173.458	227.425	228.765	201.482	241.777	Gm16551	NA	predicted gene 16551 [Source:MGI Symbol;Acc:MGI:4414971]
ENSMUSG00000104467	56.8289	0.693743	0.28333	2.44853	0.0143441	0.10864	36.624	83.0369	93.5289	76.4809	52.9503	51.0546	41.4144	33.1326	43.2374	Gm37660	NA	predicted gene, 37660 [Source:MGI Symbol;Acc:MGI:5610888]
ENSMUSG00000030058	2938.72	0.0866671	0.0354024	2.44806	0.0143628	0.108716	3001.24	3025.66	2947.22	3107.48	3003.56	2869.89	2918.73	2758.96	2815.73	Copg1	54161	coatomer protein complex, subunit gamma 1 [Source:MGI Symbol;Acc:MGI:1858696]
ENSMUSG00000020474	212.767	0.261128	0.106694	2.44745	0.014387	0.108832	205.287	220.567	228.508	231.796	262.013	191.068	196.225	181.781	197.657	Polm	54125	polymerase (DNA directed), mu [Source:MGI Symbol;Acc:MGI:1860191]
ENSMUSG00000103558	54.7591	0.595018	0.24316	2.44702	0.0144043	0.108898	43.3705	68.3324	70.1467	58.8314	81.2513	34.0364	35.498	52.833	48.5318	Gm38220	NA	predicted gene, 38220 [Source:MGI Symbol;Acc:MGI:5611448]
ENSMUSG00000029616	1177.49	-0.147442	0.0602682	-2.44643	0.014428	0.109011	1039.93	1156.46	1080.9	1137.8	1201.42	1158.78	1259.19	1298.44	1264.47	Erp29	NA	endoplasmic reticulum protein 29 [Source:MGI Symbol;Acc:MGI:1914647]
ENSMUSG00000029148	1557.14	-0.116296	0.0475603	-2.44522	0.0144762	0.109034	1588.32	1512.83	1484.77	1429.6	1489	1660.05	1604.31	1566.19	1679.2	Nrbp1	192292	nuclear receptor binding protein 1 [Source:MGI Symbol;Acc:MGI:2183436]
ENSMUSG00000035637	192.827	0.25712	0.105147	2.44534	0.0144716	0.109034	213.961	194.618	203	212.97	214.54	162.446	187.351	165.663	180.891	Grhpr	76238	glyoxylate reductase/hydroxypyruvate reductase [Source:MGI Symbol;Acc:MGI:1923488]
ENSMUSG00000039523	709.011	0.157742	0.064504	2.44546	0.0144668	0.109034	797.054	706.678	725.912	703.624	781.473	653.654	673.477	647.429	691.799	Cep104	230967	centrosomal protein 104 [Source:MGI Symbol;Acc:MGI:2687282]
ENSMUSG00000042404	711.244	0.184331	0.0753587	2.44605	0.0144431	0.109034	746.937	737.817	735.477	737.746	799.732	746.48	646.853	590.118	660.033	Dennd4b	229541	DENN/MADD domain containing 4B [Source:MGI Symbol;Acc:MGI:2446201]
ENSMUSG00000060675	731.017	-0.251827	0.102995	-2.44504	0.0144836	0.109034	603.332	602.882	721.661	738.923	702.961	758.083	973.238	728.917	749.155	Plaat3	225845	phospholipase A and acyltransferase 3 [Source:MGI Symbol;Acc:MGI:2179715]
ENSMUSG00000071064	940.621	0.13529	0.0553181	2.44567	0.0144583	0.109034	962.825	934.165	1011.81	967.189	1021.58	893.456	938.726	856.97	878.867	Zfp827	622675	zinc finger protein 827 [Source:MGI Symbol;Acc:MGI:2444807]
ENSMUSG00000025264	620.81	-0.163594	0.0669323	-2.44417	0.0145186	0.109117	573.455	618.452	598.372	601.257	556.891	685.369	608.397	686.829	658.268	Tsr2	69499	TSR2 20S rRNA accumulation [Source:MGI Symbol;Acc:MGI:1916749]
ENSMUSG00000030275	1780.73	0.122942	0.0503189	2.44326	0.0145553	0.109117	1905.41	1857.08	1871.64	1824.95	1779.31	1742.04	1806.46	1658.42	1581.25	Etnk1	75320	ethanolamine kinase 1 [Source:MGI Symbol;Acc:MGI:1922570]
ENSMUSG00000032202	89.6317	-0.410303	0.167928	-2.44332	0.0145528	0.109117	73.248	70.9273	86.0891	69.4211	91.2936	109.845	102.55	85.0701	118.241	Rab27a	11891	RAB27A, member RAS oncogene family [Source:MGI Symbol;Acc:MGI:1861441]
ENSMUSG00000032294	18912	0.206497	0.0844937	2.44394	0.0145279	0.109117	21947.4	21103.5	23138.8	17203.5	17123.9	17483.9	17185	17054.3	17967.4	Pkm	18746	pyruvate kinase, muscle [Source:MGI Symbol;Acc:MGI:97591]
ENSMUSG00000032318	344.092	-0.237238	0.0971082	-2.44303	0.0145647	0.109117	326.725	277.655	296.529	349.459	344.177	348.873	363.855	410.128	379.431	Isl2	104360	insulin related protein 2 (islet 2) [Source:MGI Symbol;Acc:MGI:109156]
ENSMUSG00000047514	1320.14	-0.1464	0.0599248	-2.44306	0.0145635	0.109117	1386.89	1310.43	1199.93	1166.04	1235.2	1385.44	1409.07	1441.72	1346.54	Tspyl1	NA	testis-specific protein, Y-encoded-like 1 [Source:MGI Symbol;Acc:MGI:1298395]
ENSMUSG00000061911	1336.14	0.318048	0.130139	2.44391	0.0145291	0.109117	1233.65	2087.17	1365.73	1313.12	1323.76	1168.07	1128.05	1226.8	1178.88	Myt1l	17933	myelin transcription factor 1-like [Source:MGI Symbol;Acc:MGI:1100511]
ENSMUSG00000096956	82.7725	0.404284	0.165476	2.44316	0.0145593	0.109117	85.7772	81.3069	92.4661	94.1303	110.465	69.6199	77.8985	63.5787	69.7093	Snhg18	NA	small nucleolar RNA host gene 18 [Source:MGI Symbol;Acc:MGI:1914085]
ENSMUSG00000005534	1441.94	0.171748	0.0704075	2.43934	0.0147141	0.109972	1636.51	1513.69	1514.53	1429.6	1492.65	1226.08	1243.42	1467.68	1453.31	Insr	16337	insulin receptor [Source:MGI Symbol;Acc:MGI:96575]
ENSMUSG00000020303	65.3702	0.611429	0.250612	2.43975	0.0146975	0.109972	113.727	78.712	79.7121	57.6548	55.6891	40.9984	63.1076	53.7285	45.0022	Stc2	20856	stanniocalcin 2 [Source:MGI Symbol;Acc:MGI:1316731]
ENSMUSG00000022820	406.224	-0.225019	0.0922326	-2.43969	0.0147	0.109972	332.507	385.775	370.927	409.467	392.562	478.057	384.562	446.842	455.317	Ndufb4	68194	NADH:ubiquinone oxidoreductase subunit B4 [Source:MGI Symbol;Acc:MGI:1915444]
ENSMUSG00000031917	678.561	-0.196403	0.0805079	-2.43955	0.0147056	0.109972	618.753	632.291	657.891	629.496	648.184	684.596	650.797	742.349	842.689	Nip7	66164	NIP7, nucleolar pre-rRNA processing protein [Source:MGI Symbol;Acc:MGI:1913414]
ENSMUSG00000047260	583.757	-0.170605	0.0699691	-2.43829	0.0147567	0.110158	518.519	544.929	573.927	563.605	563.281	583.26	631.076	675.188	600.03	Emc6	66048	ER membrane protein complex subunit 6 [Source:MGI Symbol;Acc:MGI:1913298]
ENSMUSG00000047976	155.696	0.342651	0.140527	2.43834	0.014755	0.110158	183.12	179.048	174.304	144.725	177.11	125.316	130.159	169.245	118.241	Kcna1	NA	potassium voltage-gated channel, shaker-related subfamily, member 1 [Source:MGI Symbol;Acc:MGI:96654]
ENSMUSG00000022571	364.125	-0.223071	0.0915168	-2.43748	0.0147898	0.110339	380.697	306.198	320.974	317.69	367.913	371.306	405.269	401.173	405.902	Pycrl	66194	pyrroline-5-carboxylate reductase-like [Source:MGI Symbol;Acc:MGI:1913444]
ENSMUSG00000024191	470.691	0.274219	0.112615	2.43501	0.0148916	0.110976	401.9	530.225	522.912	577.725	518.548	449.435	364.841	402.964	467.67	Bnip1	224630	BCL2/adenovirus E1B interacting protein 1 [Source:MGI Symbol;Acc:MGI:109328]
ENSMUSG00000074211	341.855	-0.211899	0.0870233	-2.43497	0.014893	0.110976	325.761	288.034	314.597	317.69	351.48	369.759	344.134	376.1	389.137	Sdhaf1	NA	succinate dehydrogenase complex assembly factor 1 [Source:MGI Symbol;Acc:MGI:1915582]
ENSMUSG00000001768	299.245	-0.250389	0.102927	-2.43269	0.0149873	0.111612	266.97	261.22	264.644	295.334	291.227	310.969	389.492	308.043	305.309	Rin2	74030	Ras and Rab interactor 2 [Source:MGI Symbol;Acc:MGI:1921280]
ENSMUSG00000026600	254.589	0.237925	0.0978871	2.43061	0.0150735	0.112119	299.738	261.22	252.953	281.214	270.229	237.481	236.654	243.569	208.246	Soat1	20652	sterol O-acyltransferase 1 [Source:MGI Symbol;Acc:MGI:104665]
ENSMUSG00000071984	62.4572	0.59446	0.244555	2.43079	0.0150661	0.112119	89.6324	68.3324	61.644	52.9483	94.9453	57.243	32.5399	48.3557	56.4734	Fndc1	68655	fibronectin type III domain containing 1 [Source:MGI Symbol;Acc:MGI:1915905]
ENSMUSG00000074884	1221.68	-0.127501	0.0524665	-2.43015	0.0150927	0.112196	1092.94	1135.7	1202.06	1193.1	1244.33	1289.52	1308.5	1273.37	1255.65	Serf2	378702	small EDRK-rich factor 2 [Source:MGI Symbol;Acc:MGI:1337041]
ENSMUSG00000086158	98.0498	-0.356692	0.146805	-2.4297	0.0151113	0.112267	85.7772	77.8471	87.1519	83.5406	101.336	104.43	110.438	111.039	120.888	Ccpg1os	NA	cell cycle progression 1, opposite strand [Source:MGI Symbol;Acc:MGI:3648770]
ENSMUSG00000002477	1542.64	-0.140119	0.0576763	-2.42941	0.0151235	0.112291	1332.92	1433.25	1540.04	1595.51	1480.78	1643.8	1569.8	1619.02	1668.61	Snrpd1	20641	small nuclear ribonucleoprotein D1 [Source:MGI Symbol;Acc:MGI:98344]
ENSMUSG00000021193	1256.03	0.122776	0.0505648	2.4281	0.0151781	0.112629	1355.09	1276.69	1318.97	1286.06	1278.11	1180.44	1281.87	1156.95	1170.06	Pitrm1	69617	pitrilysin metallepetidase 1 [Source:MGI Symbol;Acc:MGI:1916867]
ENSMUSG00000000001	2890.03	-0.0979682	0.0403671	-2.42693	0.0152271	0.112858	2801.74	2861.31	2874.95	2793.32	2680.38	2917.07	3021.28	3136.85	2923.38	Gnai3	14679	guanine nucleotide binding protein (G protein), alpha inhibiting 3 [Source:MGI Symbol;Acc:MGI:95773]
ENSMUSG00000042269	59.7441	-0.51176	0.210849	-2.42714	0.0152185	0.112858	51.0808	34.5987	45.7016	60.0081	60.2538	63.4315	67.0518	78.8018	76.7685	Fam92b	436062	family with sequence similarity 92, member B [Source:MGI Symbol;Acc:MGI:3588213]
ENSMUSG00000036306	289.578	0.327769	0.135101	2.4261	0.0152621	0.11305	300.702	420.374	307.157	291.804	270.229	226.651	259.333	276.702	253.248	Lzts1	211134	leucine zipper, putative tumor suppressor 1 [Source:MGI Symbol;Acc:MGI:2684762]
ENSMUSG00000027799	4075.51	0.210791	0.0869157	2.42523	0.0152985	0.113124	3859.01	5328.2	4116.33	4121.73	4259.76	3375.02	3783.5	4013.52	3822.54	Nbea	26422	neurobeachin [Source:MGI Symbol;Acc:MGI:1347075]
ENSMUSG00000040964	1420.75	0.142399	0.0587141	2.42529	0.0152961	0.113124	1524.71	1434.98	1503.9	1441.37	1509.08	1304.21	1224.68	1379.03	1464.78	Arhgef10l	72754	Rho guanine nucleotide exchange factor (GEF) 10-like [Source:MGI Symbol;Acc:MGI:1920004]
ENSMUSG00000075410	164.654	-0.486185	0.200471	-2.42521	0.0152994	0.113124	166.736	114.176	112.66	145.902	159.764	196.483	123.257	217.6	245.306	Prcd	100038570	photoreceptor disc component [Source:MGI Symbol;Acc:MGI:3649529]
ENSMUSG00000023022	277.515	0.255733	0.105542	2.42305	0.0153909	0.113734	274.68	305.333	288.027	316.513	310.398	254.499	294.831	228.346	225.011	Lima1	65970	LIM domain and actin binding 1 [Source:MGI Symbol;Acc:MGI:1920992]
ENSMUSG00000005161	7471.9	-0.0987337	0.0407601	-2.42231	0.015422	0.113829	6910.37	7434.39	7234.67	7192.73	7447.73	7796.66	7262.31	7943.76	8024.52	Prdx2	21672	peroxiredoxin 2 [Source:MGI Symbol;Acc:MGI:109486]
ENSMUSG00000029209	488.296	-0.235922	0.0973888	-2.42248	0.0154152	0.113829	542.613	452.378	446.388	396.524	424.515	549.224	477.251	552.508	553.263	Gnpda2	67980	glucosamine-6-phosphate deaminase 2 [Source:MGI Symbol;Acc:MGI:1915230]
ENSMUSG00000028470	267.338	-0.252072	0.104103	-2.42136	0.0154624	0.11402	217.816	229.216	241.262	268.271	276.62	293.177	269.193	292.82	317.663	Hint2	68917	histidine triad nucleotide binding protein 2 [Source:MGI Symbol;Acc:MGI:1916167]
ENSMUSG00000040479	2353.8	0.125144	0.0516852	2.42127	0.0154662	0.11402	2336.22	2483.32	2380.74	2535.64	2487.75	2444.43	2148.62	2150.04	2217.46	Dgkz	104418	diacylglycerol kinase zeta [Source:MGI Symbol;Acc:MGI:1278339]
ENSMUSG00000030521	601.923	-0.193269	0.0798622	-2.42003	0.0155194	0.114301	549.36	529.36	619.629	611.847	521.286	601.052	622.202	675.188	687.387	Mphosph10	67973	M-phase phosphoprotein 10 (U3 small nucleolar ribonucleoprotein) [Source:MGI Symbol;Acc:MGI:1915223]
ENSMUSG00000034616	168.06	0.359021	0.148359	2.41995	0.0155227	0.114301	160.953	219.702	151.984	223.559	175.284	147.749	158.755	129.844	144.713	Ssh3	245857	slingshot protein phosphatase 3 [Source:MGI Symbol;Acc:MGI:2683546]
ENSMUSG00000038860	324.362	0.325658	0.134607	2.41932	0.0155493	0.11443	272.752	465.352	351.796	355.342	335.96	276.159	277.082	287.448	297.368	Garnl3	99326	GTPase activating RANGAP domain-like 3 [Source:MGI Symbol;Acc:MGI:2139309]
ENSMUSG00000021061	1522.97	-0.200963	0.0830779	-2.41898	0.0155642	0.114471	1356.05	1401.25	1504.97	1544.91	1332.89	1374.61	1846.88	1690.66	1654.49	Sptb	20741	spectrin beta, erythrocytic [Source:MGI Symbol;Acc:MGI:98387]
ENSMUSG00000020994	3825.53	0.145657	0.060239	2.41798	0.0156069	0.114618	3647.94	3979.71	4276.82	4306.46	3774.08	3887.11	3519.24	3534.44	3504	Pnn	18949	pinin [Source:MGI Symbol;Acc:MGI:1100514]
ENSMUSG00000040710	408.912	-0.310283	0.128316	-2.41811	0.0156013	0.114618	462.619	398.75	311.409	327.103	346.003	464.906	535.429	431.619	402.373	St8sia4	20452	ST8 alpha-N-acetyl-neuraminide alpha-2,8-sialyltransferase 4 [Source:MGI Symbol;Acc:MGI:106018]
ENSMUSG00000044018	1055.33	-0.154648	0.0639605	-2.41787	0.0156118	0.114618	1022.58	996.442	1045.82	998.958	960.409	1054.35	1069.87	1251.87	1097.7	Mrpl50	28028	mitochondrial ribosomal protein L50 [Source:MGI Symbol;Acc:MGI:107329]
ENSMUSG00000005045	981.824	0.341025	0.1411	2.41691	0.0156531	0.114854	889.577	1563.86	942.729	1071.91	946.715	807.591	828.287	890.998	894.75	Chd5	269610	chromodomain helicase DNA binding protein 5 [Source:MGI Symbol;Acc:MGI:3036258]
ENSMUSG00000066568	2795.88	-0.105564	0.0436939	-2.416	0.015692	0.115071	2882.69	2561.17	2688.96	2641.53	2749.76	3000.62	2888.16	2861.94	2888.08	Lsm14a	67070	LSM14A mRNA processing body assembly factor [Source:MGI Symbol;Acc:MGI:1914320]
ENSMUSG00000028049	619.293	0.204353	0.0845984	2.41556	0.0157109	0.115075	620.68	640.941	666.393	758.926	605.276	618.07	590.648	523.853	548.851	Scamp3	24045	secretory carrier membrane protein 3 [Source:MGI Symbol;Acc:MGI:1346346]
ENSMUSG00000028373	382.82	0.204994	0.0848611	2.41563	0.0157078	0.115075	399.972	428.159	377.304	403.584	423.602	331.855	339.203	395.8	345.9	Astn2	56079	astrotactin 2 [Source:MGI Symbol;Acc:MGI:1889277]
ENSMUSG00000038523	71.6309	0.465262	0.192633	2.41528	0.0157232	0.115097	79.0307	82.1719	82.9006	80.0108	84.903	74.2612	42.4004	51.9376	67.0622	1700003F12Rik	75480	RIKEN cDNA 1700003F12 gene [Source:MGI Symbol;Acc:MGI:1922730]
ENSMUSG00000029463	970.048	-0.154488	0.0640159	-2.41328	0.0158098	0.115663	983.065	898.701	905.53	924.83	907.458	1023.41	921.963	1092.48	1072.99	Fam216a	68948	family with sequence similarity 216, member A [Source:MGI Symbol;Acc:MGI:1916198]
ENSMUSG00000002957	2282.36	0.0996927	0.0413411	2.41147	0.0158884	0.115739	2404.65	2446.99	2236.19	2290.9	2379.11	2220.88	2185.1	2226.15	2151.28	Ap2a2	11772	adaptor-related protein complex 2, alpha 2 subunit [Source:MGI Symbol;Acc:MGI:101920]
ENSMUSG00000004698	436.63	0.197934	0.0820511	2.41233	0.0158508	0.115739	483.822	467.947	465.519	480.065	418.125	389.098	404.283	375.204	445.61	Hdac9	79221	histone deacetylase 9 [Source:MGI Symbol;Acc:MGI:1931221]
ENSMUSG00000014850	911.228	0.160765	0.06663	2.4128	0.0158306	0.115739	849.098	945.409	1018.19	1010.72	958.583	845.495	827.301	905.325	840.924	Msh3	17686	mutS homolog 3 [Source:MGI Symbol;Acc:MGI:109519]
ENSMUSG00000027472	715.29	-0.14696	0.0609542	-2.41098	0.0159096	0.115739	711.276	710.138	678.085	641.263	671.008	752.669	755.319	794.287	723.565	Pdrg1	68559	p53 and DNA damage regulated 1 [Source:MGI Symbol;Acc:MGI:1915809]
ENSMUSG00000027574	600.04	-0.214999	0.0891291	-2.41222	0.0158559	0.115739	568.636	480.922	645.137	569.488	538.632	661.389	590.648	654.592	690.917	Nkain4	58237	Na+/K+ transporting ATPase interacting 4 [Source:MGI Symbol;Acc:MGI:1915372]
ENSMUSG00000028833	1348.21	0.195441	0.0810233	2.41216	0.0158583	0.115739	1369.54	1700.53	1238.2	1454.31	1379.45	1270.18	1224.68	1256.35	1240.65	Ncdn	26562	neurochondrin [Source:MGI Symbol;Acc:MGI:1347351]
ENSMUSG00000033335	1145.7	0.148753	0.0616758	2.41185	0.0158718	0.115739	1228.83	1172.9	1194.62	1138.98	1252.55	1125.52	1164.53	986.814	1046.52	Dnm2	13430	dynamin 2 [Source:MGI Symbol;Acc:MGI:109547]
ENSMUSG00000040563	1051.35	0.187199	0.0776222	2.41166	0.01588	0.115739	1037.04	1273.23	1002.25	1161.33	1083.65	1013.36	901.256	979.65	1010.34	Plppr2	235044	phospholipid phosphatase related 2 [Source:MGI Symbol;Acc:MGI:2384575]
ENSMUSG00000058454	874.61	0.159237	0.0660456	2.41102	0.015908	0.115739	1029.33	908.216	871.519	908.357	868.202	815.327	829.274	786.227	855.042	Dhcr7	13360	7-dehydrocholesterol reductase [Source:MGI Symbol;Acc:MGI:1298378]
ENSMUSG00000099966	312.097	-0.222707	0.0923748	-2.4109	0.0159131	0.115739	269.861	267.275	293.341	330.633	293.965	343.458	312.58	347.444	350.312	2810402E24Rik	NA	RIKEN cDNA 2810402E24 gene [Source:MGI Symbol;Acc:MGI:1913715]
ENSMUSG00000062210	406.655	-0.247193	0.102594	-2.40943	0.0159773	0.116138	400.936	312.253	351.796	401.23	411.734	462.586	490.07	411.919	417.374	Tnfaip8	106869	tumor necrosis factor, alpha-induced protein 8 [Source:MGI Symbol;Acc:MGI:2147191]
ENSMUSG00000020003	256.915	-0.255149	0.105911	-2.40909	0.0159925	0.116181	269.861	221.432	244.451	218.853	229.147	310.969	249.472	287.448	280.602	Pex7	NA	peroxisomal biogenesis factor 7 [Source:MGI Symbol;Acc:MGI:1321392]
ENSMUSG00000021496	94.287	-0.391002	0.162425	-2.40727	0.0160722	0.116655	77.1031	70.9273	76.5236	98.8368	91.2936	96.6943	101.564	123.576	112.064	Pcbd2	72562	pterin 4 alpha carbinolamine dehydratase/dimerization cofactor of hepatocyte nuclear factor 1 alpha (TCF1) 2 [Source:MGI Symbol;Acc:MGI:1919812]
ENSMUSG00000028718	931.912	0.218496	0.0907688	2.40717	0.0160765	0.116655	843.315	960.114	1166.99	1058.97	942.15	804.497	819.413	880.252	911.516	Stil	20460	Scl/Tal1 interrupting locus [Source:MGI Symbol;Acc:MGI:107477]
ENSMUSG00000044024	261.971	0.384037	0.159565	2.40677	0.0160942	0.116716	237.092	409.13	275.273	291.804	248.319	241.349	197.211	214.019	243.541	Rell2	225392	RELT-like 2 [Source:MGI Symbol;Acc:MGI:1918044]
ENSMUSG00000015452	180.608	0.345943	0.143785	2.40597	0.0161297	0.116837	175.41	166.074	205.126	251.799	200.846	157.805	134.104	172.827	161.479	Ager	11596	advanced glycosylation end product-specific receptor [Source:MGI Symbol;Acc:MGI:893592]
[truncated: 13,704 more rows]
