# Supplementary figures and images for: Glycolytic flux controls retinal progenitor cell differentiation via regulating Wnt signaling
Source: eLife journal article supplement (doi:10.7554/elife.100604), 2024-10-04

Figure 6D

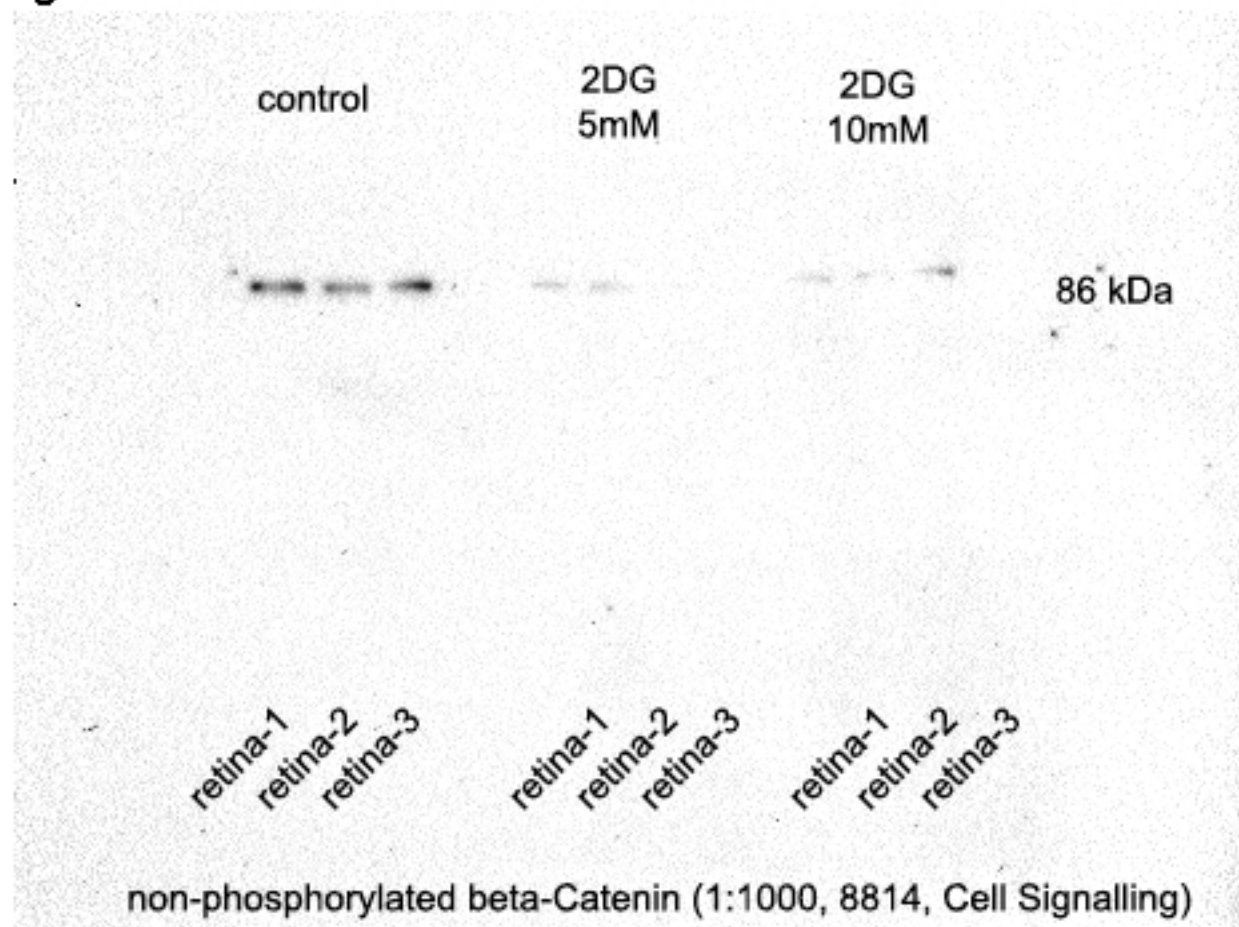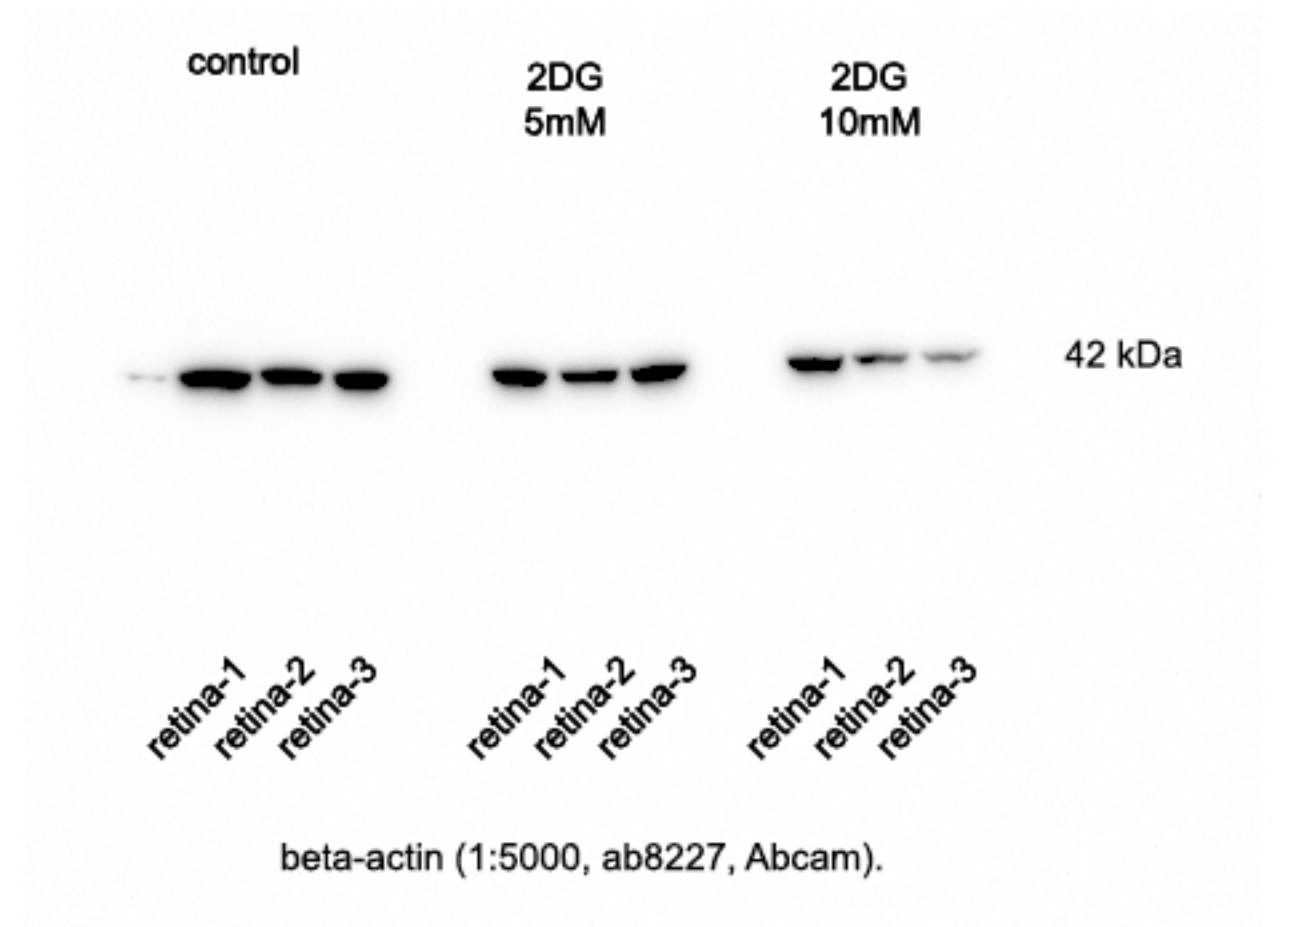

Figure 6E

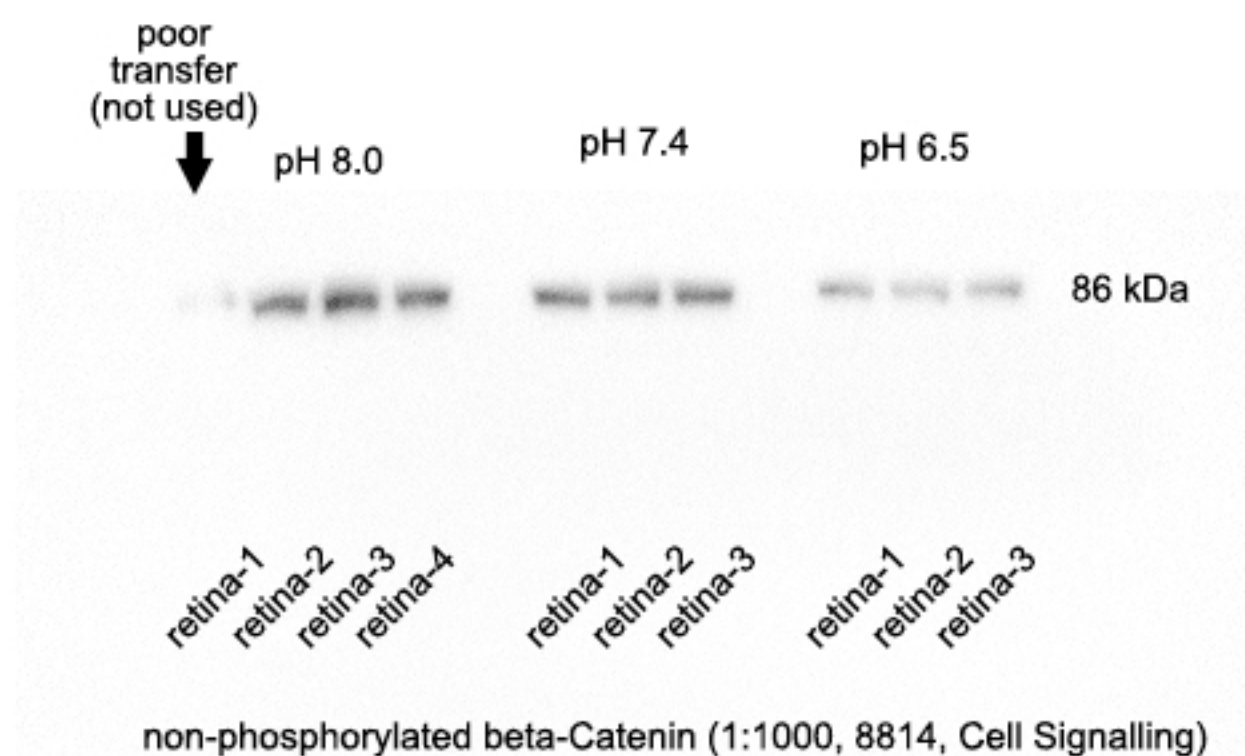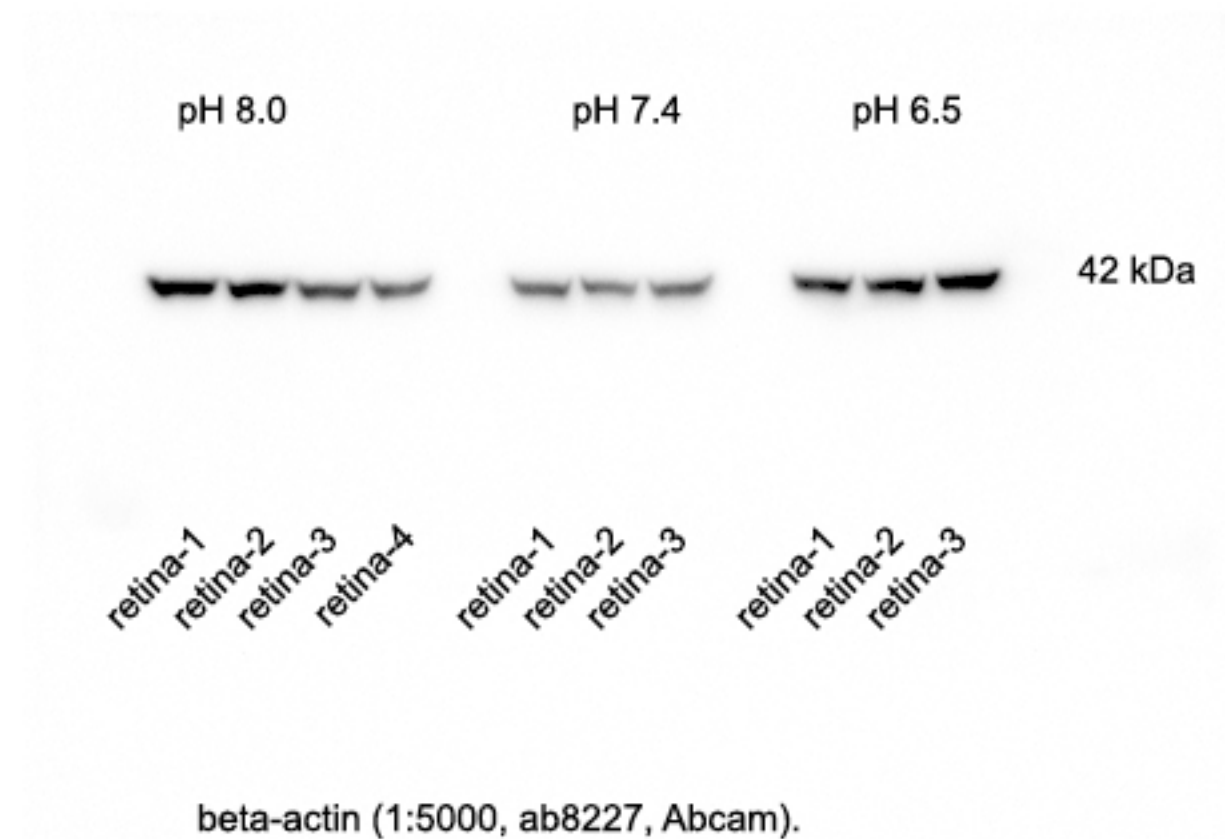

Supplement: fig6-data1 [file elife-100604-fig6-data1-v1.zip]
